# Supplementary material for: Emotional Appetite Questionnaire: psychometric properties in Brazilian adult samples before and after the COVID-19 pandemic onset
Source: PeerJ. 2023 Jan 26;11:e14597. doi: 10.7717/peerj.14597 (PMC9884477; doi:10.7717/peerj.14597)
Supplement: Supplemental Information 2 — Demographic characteristics, the answers given to the EMAQ (in the general database tab), and the raw EMAQ and TFEQ data used to estimate the polychoric correlation between the scales. [file peerj-11-14597-s002.xlsx]

## Sheet: Codes
Variable (in columns)	Code
Sample	1= data obtained before the pandemic; n=323; age= 18-24 years old
	2= data obtained after the start of the pandemic; n=1.011; age= 18-24 years old
	3= data obtained after the start of the pandemic; n=909; age ≥ 25 years old
ID (identification number)	-
Age (in years old)	-
Sex	1 = male
	2 = female
	3 = non-binary
Weight (in Kg) and Height (in meters)	-
BMI (Body Mass Index - kg/m²)	-
AWS (Anthropometric Weight Status)	1 = underweight
	2 = Normal range
	3 = Overweight or pre-obese
	4 = Obese
Economic Level	0 = Low income
	1 = Medium income
	2 = High income
Changediet (In the face of the pandemic, do you feel that there has been a change in your diet?) Only for samples 2 and 3	0 = No
	1 = Yes
Amountfood (In the context of the pandemic, do you feel that the amount of food ingested:) Only for samples 2 and 3	1 = Decreased
	2 = Neither decreased nor increased
	3 = Increased
Emotions (Do you believe that your emotions influenced your eating habits in the context of the COVID-19 pandemic?) Only for samples 2 and 3	0 = No
	1 = Yes

## Sheet: General Database
Sample	ID	Age	Sex	Weight	Height	BMI	AWS	EconLevel	Changediet	Amountfood	Emotions	EMAQ1	EMAQ2	EMAQ3	EMAQ4	EMAQ5	EMAQ6	EMAQ7	EMAQ8	EMAQ9	EMAQ10	EMAQ11	EMAQ12	EMAQ13	EMAQ14	EMAQ15	EMAQ16	EMAQ17	EMAQ18	EMAQ19	EMAQ20	EMAQ21	EMAQ22
1	1	20	1	86	1.63	32.3685	4	2				8	8	5	6	9	9	9	4	8	5	5	5	9	5	9	8	5	5	5	5	7	5
1	2	20	1	55	1.62	20.9572	2	2				2	6	5	6	5	7	1	1	1	2	6	7	1	8	1	1	1	9	1	8	1	8
1	4	20	1	42	1.6	16.4062	1	3				2	2	5	3	1	5	1	2	2	2	5	5	6	6	1	1	1	5	5	5	5	5
1	5	21	1	68	1.6	26.5625	3	3				8	5	5	5	9	9	5	5	5	5	5	3	9	5	8	5	2	2	9	2	5	5
1	6	21	1	80	1.75	26.1224	3	3				8	8	5	9	9	2	5	2	6	2	5	5	5	5	8	4	8	4	4	4	4	3
1	7	21	0	65	1.78	20.5151	2	3				7	7	5	7	7	5	7	3	8	4	5	5	8	5	7	7	2	5	5	5	5	5
1	8	22	0	121	1.9	33.518	4	2				1	3	6	6	9	9	3	5	3	5	6	8	5	7	3	4	2	7	2	6	3	7
1	9	19	1	64	1.68	22.6757	2	3				3	6	5	5	4	5	2	3	3	8	9	5	9	6	2	5	1	5	5	4	3	9
1	10	22	0	64	1.66	23.2254	2	3				5	3	5	2	5	5	5	3	5	5	5	5	6	6	5	5	2	5	5	2	5	5
1	11	22	1	60	1.55	24.974	2	3				3	7	5	5	9	7	7	5	7	2	5	5	3	7	3	3	3	5	5	7	5	5
1	12	20	1	52	1.65	19.1001	2	3				1	3	8	5	1	9	4	6	2	2	8	8	7	8	2	2	1	5	1	6	1	8
1	14	20	1	68	1.7	23.5294	2	2				9	9	5	1	9	5	9	5	1	1	5	1	1	5	5	1	1	5	9	5	1	5
1	16	18	1	53	1.65	19.4674	2	3				3	3	5	3	2	5	3	3	2	3	5	5	4	5	2	3	2	5	4	5	4	5
1	17	19	1	58	1.65	21.3039	2	3				9	9	5	9	9	5	9	7	9	6	5	5	5	6	9	7	5	5	8	4	6	5
1	18	20	1	82	1.75	26.7755	3	2				6	6	5	6	6	5	6	6	6	5	5	5	5	5	4	2	4	5	3	5	5	5
1	19	18	1	65	1.6	25.3906	3	2				6	6	5	6	8	6	7	5	7	6	3	5	6	5	8	7	6	6	7	5	7	6
1	20	18	0	65	1.7	22.4913	2	2				7	7	5	5	7	5	7	5	7	3	5	5	7	5	3	3	1	5	5	7	7	5
1	21	20	1	63	1.67	22.5896	2	2				4	4	2	6	8	7	4	2	4	5	5	5	8	5	5	7	2	5	5	3	5	5
1	22	22	1	50	1.58	20.0288	2	3				9	9	5	5	9	5	6	4	5	1	5	5	4	5	9	1	9	4	9	5	1	5
1	23	24	1	49	1.62	18.6709	2	2				2	2	5	5	5	5	9	9	9	1	5	5	5	7	9	9	1	5	4	5	5	5
1	24	19	1	34	1.53	14.5243	1	2				9	2	5	2	9	5	2	2	6	2	5	5	8	5	7	5	2	5	5	5	5	5
1	25	19	1	72	1.7	24.9135	2	2				9	5	5	6	9	5	6	2	9	2	5	5	9	5	3	7	9	5	9	1	2	5
1	26	20	1	80	1.7	27.6817	3	2				7	5	4	7	8	5	7	4	1	1	5	5	9	5	8	8	5	4	8	5	4	7
1	27	19	1	52	1.57	21.0962	2	3				6	5	5	5	3	7	8	3	7	4	5	5	6	5	6	5	4	5	5	7	5	5
1	28	20	1	55	1.56	22.6003	2	3				6	6	5	5	7	7	5	5	5	5	5	5	5	5	5	5	5	5	5	5	5	5
1	29	20	1	63	1.65	23.1405	2	3				9	9	7	9	9	7	9	4	9	5	6	5	8	6	9	9	5	9	9	5	5	7
1	30	19	1	46	1.55	19.1467	2	3				9	9	7	7	9	6	9	6	8	3	4	5	8	5	8	2	2	5	8	5	4	4
1	31	21	1	58	1.73	19.3792	2	2				9	9	5	1	8	8	7	5	8	1	1	5	9	4	3	9	9	9	2	4	9	9
1	32	20	1	52	1.55	21.6441	2	3				7	7	5	5	9	7	7	5	7	5	5	5	7	5	5	5	5	5	5	5	5	7
1	34	19	1	58	1.64	21.5645	2	3				6	6	5	6	6	6	4	4	4	4	6	5	5	6	5	4	2	6	5	6	4	6
1	35	20	1	52	1.59	20.5688	2	3				6	5	5	5	8	5	5	3	6	5	5	5	6	5	5	5	4	6	6	7	5	5
1	36	18	1	70	1.69	24.5089	2	2				9	9	3	9	7	5	9	2	7	2	5	5	3	5	9	3	3	5	3	3	3	7
1	37	21	1	49	1.53	20.9321	2	3				3	3	5	6	9	5	3	4	2	5	5	5	5	5	5	4	2	5	2	5	3	5
1	38	20	1	68	1.58	27.2392	3	3				9	6	3	2	9	5	2	2	9	2	5	5	1	5	9	3	8	5	7	2	2	5
1	39	21	1	44	1.5	19.5556	2	2				2	3	7	3	8	8	5	1	3	3	8	8	8	7	5	5	4	6	1	6	1	5
1	40	21	0	65	1.73	21.7181	2	2				2	8	8	8	8	8	7	7	1	2	9	6	4	9	8	6	2	7	1	6	9	9
1	41	19	1	45	1.59	17.7999	1	3				2	6	3	3	9	6	1	4	1	1	7	6	1	1	2	1	1	6	1	5	5	6
1	42	21	0	85	1.72	28.7317	3	3				5	5	5	5	5	5	5	5	5	5	5	5	5	5	5	5	2	5	5	5	1	5
1	43	20	1	53	1.61	20.4467	2	3				6	6	5	1	1	5	1	1	1	5	5	5	1	5	2	1	5	5	2	6	5	7
1	44	18	0	85	1.75	27.7551	3	3				5	5	4	4	7	5	7	7	7	4	5	5	5	5	4	4	4	4	4	5	5	5
1	45	19	0	85	1.78	26.8274	3	3				5	7	5	7	9	5	6	5	6	5	8	5	5	5	6	5	3	5	6	4	8	5
1	47	20	0	70	1.69	24.5089	2	3				7	5	5	5	2	6	5	5	5	7	5	6	8	5	5	5	1	5	4	5	5	5
1	48	24	1	54	1.62	20.5761	2	2				5	5	5	3	1	5	2	5	1	5	5	5	7	5	1	4	2	5	1	5	5	8
1	49	19	1	64	1.58	25.6369	3	2				8	4	5	5	5	8	5	8	9	5	5	5	5	5	5	5	5	5	9	5	5	5
1	51	20	1	73	1.77	23.3011	2	3				4	7	6	7	6	7	8	5	6	5	5	5	5	6	3	3	3	6	2	7	6	6
1	52	21	1	58	1.63	21.83	2	2				2	3	6	5	9	6	4	4	3	4	7	6	4	6	4	4	2	5	5	4	3	6
1	53	21	1		1.65	0		1				6	6	5	5	6	5	6	4	6	5	5	5	5	5	6	5	5	5	5	5	6	5
1	54	22	0	65	1.75	21.2245	2	1				4	4	5	4	6	5	5	5	4	5	5	5	5	5	5	4	4	5	4	5	5	5
1	55	21	1	60	1.63	22.5827	2	3				8	5	5	6	9	6	7	8	8	5	5	4	7	7	4	5	6	5	7	5	5	5
1	56	22	1					2				6	3	3	5	7	5	7	4	4	5	5	4	7	5	7	4	3	5	4	5	6	6
1	57	19	1	52	1.57	21.0962	2	3				3	3	5	6	9	7	2	2	1	5	6	5	3	5	7	3	2	6	1	1	5	6
1	58	22	0	76	1.7	26.2976	3	3				1	4	5	4	7	5	4	5	4	5	5	5	5	5	7	4	1	4	4	5	4	5
1	59	21	1	54	1.61	20.8325	2	3				4	4	5	4	4	5	4	4	4	4	5	5	4	7	9	6	4	7	4	7	4	4
1	60	19	1	47	1.65	17.2635	1	3				3	3	5	4	2	5	2	2	3	3	5	5	5	5	3	3	2	5	5	4	4	5
1	61	18	1	72	1.72	24.3375	2	3				9	6	5	7	9	7	7	5	9	5	5	5	9	5	6	4	5	5	9	5	6	5
1	62	19	0	60	1.64	22.3081	2	3				5	4	5	5	7	5	4	7	5	5	5	5	7	5	5	5	5	5	5	5	5	6
1	63	21	0	80	1.75	26.1224	3	2				4	4	5	5	5	6	4	5	4	5	5	5	7	5	4	5	2	5	5	5	4	5
1	64	21	1	49	1.65	17.9982	1	2				8	5	5	2	8	7	2	2	7	5	5	5	5	5	8	5	5	7	9	8	5	7
1	65	21	1	65	1.77	20.7476	2	2				7	6	5	5	9	6	5	5	9	5	5	5	6	6	7	5	5	5	3	5	3	5
1	67	18	1	83	1.6	32.4219	4	2				4	4	5	6	7	7	4	2	2	5	7	7	5	7	6	5	4	7	7	5	5	5
1	68	21	1	68	1.7	23.5294	2	2				4	5	1	1	7	5	5	5	3	5	5	5	5	5	2	1	1	5	4	5	1	5
1	70	18	1	51	1.65	18.7328	2	3				2	2	2	4	8	7	2	2	4	2	6	3	2	3	1	1	1	1	4	5	1	5
1	71	23	0	87	1.75	28.4082	3	3				6	5	5	3	7	5	5	5	6	2	6	6	8	5	6	2	2	4	2	8	5	7
1	73	19	0	76	1.8	23.4568	2	2				8	7	5	5	9	5	6	3	7	5	5	5	5	5	6	5	5	5	8	5	1	5
1	74	18	1	52	1.64	19.3337	2	3				2	2	6	5	9	7	6	3	1	2	7	7	9	5	9	2	1	5	4	7	5	7
1	76	21	1	73	1.72	24.6755	2	3				1	5	5	5	9	5	5	3	1	3	5	5	1	5	3	1	1	7	1	5	5	5
1	77	21	0	70	1.68	24.8016	2	3				5	5	6	6	6	5	5	3	5	3	5	5	5	6	3	5	3	5	3	3	3	5
1	78	19	1	59	1.6	23.0469	2	3				3	3	5	4	1	7	5	5	1	4	5	7	8	8	1	1	1	4	2	7	5	7
1	79	19	1	58	1.65	21.3039	2	2				3	6	5	6	8	5	5	4	7	5	5	5	4	5	7	6	5	5	5	8	5	6
1	80	18	1	58	1.7	20.0692	2	3				3	3	5	7	3	7	3	3	1	3	5	5	4	7	2	7	2	3	2	5	7	5
1	81	20	1	57	1.63	21.4536	2	2				2	4	5	4	2	7	4	5	4	4	6	5	5	6	3	2	2	7	2	6	4	5
1	82	21	1	49.5	1.6	19.3359	2	3				7	7	5	5	7	8	5	6	6	6	8	5	6	8	8	5	5	7	5	8	5	5
1	84	20	1	67	1.62	25.5296	3	3				5	5	6	4	7	5	4	4	5	4	5	6	5	5	5	5	4	5	5	5	4	6
1	85	21	0	80	1.93	21.4771	2	2				9	6	5	6	9	7	2	3	5	1	5	5	9	6	7	3	5	6	6	5	9	9
1	85	19	1	62	1.68	21.9671	2	3				2	2	7	4	9	9	3	2	1	5	7	5	5	5	9	5	2	6	9	5	5	5
1	86	19	1	57	1.65	20.9366	2	3				2	5	5	3	7	5	5	3	5	3	6	5	4	5	3	2	2	5	3	6	2	5
1	87	19	1	55	1.61	21.2183	2	3				8	8	6	7	8	5	7	5	7	5	5	5	6	5	7	5	6	5	6	5	6	6
1	89	19	1	76	1.62	28.959	3	3				8	4	5	3	9	7	8	5	5	5	5	5	7	7	8	4	5	5	5	5	5	5
1	91	19	1	68	1.63	25.5937	3	2				6	6	5	5	6	5	5	4	5	4	5	5	6	5	5	5	4	5	5	5	4	6
1	92	21	1	60	1.65	22.0386	2	3				1	4	5	6	8	5	5	5	1	5	5	5	7	5	8	6	1	3	3	5	5	5
1	94	19	1	69	1.74	22.7903	2	3				7	5	5	5	7	5	5	5	5	5	5	5	5	5	5	5	3	3	5	7	5	6
1	96	21	1	71	1.71	24.281	2	2				4	4	1	2	7	1	8	5	6	1	1	1	3	2	1	1	2	3	1	2	4	5
1	97	19	1	67	1.73	22.3863	2	3				8	8	8	3	8	8	5	2	5	7	7	3	3	3	5	5	8	8	2	5	3	8
1	99	19	1	69	1.6	26.9531	3	3				5	5	3	6	7	5	7	7	7	7	5	5	5	6	9	8	6	4	3	5	8	5
1	100	19	1	63	1.59	24.9199	2	3				8	8	5	3	9	5	8	5	8	3	5	5	8	5	7	8	4	6	2	5	5	5
1	101	20	0	70	1.8	21.6049	2	3				5	5	5	5	6	6	5	5	5	5	7	6	5	5	4	5	5	5	5	3	5	6
1	101	20	1	60	1.59	23.7332	2	3				3	3	5	3	8	5	3	3	3	5	8	5	5	5	7	5	5	5	5	5	5	7
1	102	20	1	45	1.58	18.026	1	3				7	7	5	5	8	7	7	6	6	5	5	5	5	5	7	5	6	5	7	6	6	7
1	104	21	1	58	1.64	21.5645	2	3				2	2	5	2	9	7	7	3	3	1	6	5	7	4	1	1	1	5	3	3	1	7
1	105	20	1	47	1.55	19.563	2	3				3	3	3	7	9	5	7	7	7	2	5	4	9	5	7	4	2	5	2	5	7	5
1	106	21	1	52	1.57	21.0962	2	2				1	1	5	3	9	9	9	1	1	1	5	4	9	5	1	1	1	1	1	1	1	9
1	107	21	1	58	1.63	21.83	2	3				7	3	3	5	6	4	6	6	9	5	6	5	7	5	8	5	2	5	7	5	7	5
1	108	21	0	93	1.91	25.4927	3	3				7	5	8	5	9	9	5	2	3	5	7	5	8	7	5	5	1	5	5	7	4	5
1	109	20	1	78	1.78	24.6181	2	2				6	5	9	5	9	9	4	2	1	1	8	8	9	8	1	1	1	3	2	7	1	9
1	110	21	1	66	1.67	23.6652	2	3				3	3	5	5	5	7	5	3	7	5	5	5	3	5	7	5	1	5	3	5	5	7
1	111	20	1	51	1.6	19.9219	2	3				7	7	5	8	8	7	7	5	7	5	5	5	8	5	7	5	5	7	5	7	5	6
1	112	21	1	67	1.58	26.8386	3	2				9	9	5	9	9	5	9	5	9	5	5	5	9	5	9	9	5	5	7	5	5	5
1	113	22	1	49	1.58	19.6283	2	3				2	2	5	6	3	5	7	7	3	3	5	5	3	5	4	2	1	5	1	5	1	5
1	114	20	1	51	1.59	20.1733	2	2				3	4	7	1	8	5	6	4	2	1	5	5	3	6	3	1	1	5	8	5	4	5
1	115	20	0	105	1.89	29.3945	3	2				1	7	4	5	5	7	8	5	9	3	5	5	7	7	3	9	7	5	5	5	1	7
1	116	20	1	53	1.58	21.2306	2	3				7	4	5	5	6	5	4	3	5	5	5	5	5	5	5	5	5	5	6	6	4	5
1	118	21	1	56	1.6	21.875	2	3				5	5	5	5	7	8	4	3	8	5	5	5	7	5	3	2	2	5	5	9	4	5
1	119	24	1	57	1.57	23.1247	2	3				4	3	1	5	9	1	6	1	9	1	1	1	2	1	6	5	9	3	9	2	1	4
1	120	21	1	64	1.65	23.5078	2	3				7	5	5	5	2	5	2	5	2	2	6	5	5	5	1	2	2	5	2	6	2	7
1	121	21	1		1.66	0		3				4	3	5	3	8	5	4	4	3	3	5	5	6	6	3	2	3	4	2	5	5	5
1	122	23	0	85	1.83	25.3815	3	3				1	5	5	4	8	9	1	1	1	1	6	5	7	5	5	1	5	7	5	6	1	7
1	124	18	1	52	1.65	19.1001	2	3				3	3	5	5	2	5	4	3	2	4	5	5	6	5	3	4	3	5	4	5	4	5
1	125	19	1	61	1.5	27.1111	3	3				6	3	4	3	7	3	7	3	7	5	3	2	6	2	3	3	2	4	6	4	5	3
1	126	21	1	58	1.63	21.83	2	3				7	4	5	5	8	5	8	5	7	7	5	5	5	5	7	7	4	5	3	5	3	5
1	127	18	1	53	1.67	19.0039	2	3				2	3	3	2	2	8	5	3	3	5	5	5	5	6	3	2	2	5	4	6	4	6
1	128	21	1	72	1.73	24.0569	2	3				4	4	5	6	6	5	6	7	7	4	6	6	6	5	6	4	4	4	5	5	4	5
1	129	19	1	72	1.64	26.7698	3	3				5	6	2	6	9	5	7	5	6	1	5	5	9	5	9	7	4	5	5	5	5	5
1	130	18	0	70	1.78	22.0932	2	3				5	4	5	4	4	5	5	5	5	5	5	5	4	5	5	4	5	4	3	5	5	5
1	131	18	0	91	1.77	29.0466	3	2				6	6	5	6	5	3	6	5	6	2	5	5	6	5	5	6	2	4	5	4	4	6
1	133	19	1	80	1.6	31.25	4	2				8	4	4	8	5	2	9	2	4	4	5	5	9	5	9	3	5	8	8	3	8	5
1	134	20	0	90	1.85	26.2966	3	2				9	5	5	5	5	5	5	5	9	5	5	5	5	5	1	5	5	5	5	6	5	5
1	135	19	1	56	1.65	20.5693	2	3				5	7	5	7	8	5	8	7	8	5	5	5	7	8	8	6	5	5	7	5	7	5
1	136	20	1					2				7	1	5	1	7	5	6	4	6	3	5	5	5	5	6	2	6	5	3	5	3	5
1	137	20	1	61	1.67	21.8724	2	3				7	5	5	5	8	5	4	4	3	5	5	5	5	5	5	1	3	5	1	5	5	5
1	138	19	1	66	1.77	21.0667	2	2				5	5	5	3	7	8	8	9	9	2	9	5	7	7	9	2	2	9	9	9	2	7
1	139	18	1	54	1.6	21.0937	2	3				1	9	5	2	9	6	6	9	9	1	5	5	6	5	1	1	1	9	9	5	1	9
1	141	22	0	73	1.72	24.6755	2	2				5	5	5	5	5	5	5	3	4	5	5	5	5	5	6	5	5	5	5	4	4	5
1	143	21	1	52	1.62	19.8141	2	3				1	5	8	6	4	8	4	3	3	2	8	8	8	8	2	2	1	5	1	8	1	7
1	144	20	0	78	1.75	25.4694	3	2				5	5	5	5	5	7	5	5	5	5	5	5	8	5	7	5	5	5	5	7	5	5
1	146	19	0	89	1.81	27.1664	3	3				5	5	5	5	5	5	5	5	5	5	5	5	7	5	5	5	5	7	5	5	5	5
1	147	22	0	63	1.77	20.1092	2	2				9	9	7	1	9	5	9	2	2	5	9	5	9	5	9	9	5	5	5	5	3	5
1	148	18	0	62	1.7	21.4533	2	2				7	7	5	4	7	5	7	5	7	3	6	5	6	5	4	4	4	5	7	5	7	5
1	149	22	0	67	1.72	22.6474	2	2				5	2	5	1	1	6	7	8	3	1	7	5	4	5	1	1	1	5	3	5	1	5
1	150	18	1	57	1.7	19.7232	2	2				5	6	5	5	7	5	5	4	4	5	3	5	4	6	6	4	3	5	5	5	5	5
1	151	20	1	68	1.7	23.5294	2	3				2	2	3	4	9	7	3	2	1	2	7	5	9	9	9	7	1	5	1	5	3	9
1	153	18	0	59	1.65	21.6713	2	3				5	5	5	7	7	5	8	5	4	5	5	5	5	5	3	3	2	5	5	5	5	5
1	154	18	0	68	1.73	22.7204	2	2				6	4	5	5	5	6	5	4	5	6	7	6	5	6	4	5	1	5	9	6	9	6
1	155	18	1	65	1.7	22.4913	2	3				2	6	5	4	9	6	9	4	2	2	6	5	6	5	1	3	2	4	1	6	4	6
1	156	19	1	63	1.75	20.5714	2	3				3	3	5	5	2	5	4	2	2	2	5	5	6	5	2	3	1	2	1	6	3	5
1	157	19	1	61	1.6	23.8281	2	2				3	3	5	8	8	5	3	1	3	5	5	5	6	6	8	3	1	5	2	5	2	5
1	158	18	1	57	1.73	19.0451	2	3				9	9	5	5	9	5	2	5	9	1	5	5	9	5	1	1	1	5	5	5	5	9
1	159	21	1	70	1.62	26.6728	3	3				7	7	5	7	9	5	7	5	9	5	5	5	5	5	8	5	5	5	5	5	5	5
1	160	21	1	62	1.7	21.4533	2	2				2	2	5	2	9	5	2	5	1	5	5	5	5	5	1	1	1	7	1	5	2	5
1	161	18	1	68	1.55	28.3039	3	2				3	3	7	8	3	8	3	1	3	1	8	8	9	8	3	3	3	1	3	8	5	8
1	162	21	1	53	1.65	19.4674	2	3				4	3	5	4	8	5	4	5	4	5	5	5	6	5	4	3	1	7	4	5	5	6
1	163	18	1	70	1.65	25.7117	3	2				8	8	5	3	9	6	7	8	8	2	5	5	9	6	8	8	8	6	6	3	4	7
1	164	18	1	56	1.66	20.3223	2	2				6	5	5	5	7	7	4	6	5	4	5	5	6	6	6	4	3	5	5	5	4	6
1	165	22	1	50	1.65	18.3655	1	2				5	6	5	5	5	5	5	5	5	6	5	5	5	5	4	4	4	5	5	4	4	5
1	166	19	1	60	1.65	22.0386	2	2				9	1	9	9	1	9	1	1	1	1	5	5	6	9	1	1	1	6	1	5	1	9
1	167	19	1	58	1.66	21.048	2	2				7	7	5	3	3	5	7	5	7	3	5	5	2	5	3	7	3	3	7	5	4	5
1	168	18	1	52	1.6	20.3125	2	3				6	6	5	3	7	5	6	3	6	3	5	5	3	6	3	2	1	5	4	6	3	6
1	169	20	1	80	1.76	25.8264	3	3				6	4	5	4	6	5	5	5	5	4	6	5	5	6	3	6	2	1	7	5	4	5
1	170	19	1	79	1.64	29.3724	3	3				7	6	6	5	9	5	5	5	6	5	5	5	7	9	9	3	3	7	7	5	3	7
1	171	19	1	47	1.64	17.4747	1	2				2	2	5	2	7	7	6	4	1	5	5	6	4	6	6	2	2	5	3	5	6	7
1	172	18	1	65	1.61	25.0762	3	2				7	6	6	5	9	6	6	4	8	5	5	6	6	6	8	6	7	6	6	4	6	5
1	173	18	1	65	1.6	25.3906	3	3				8	8	4	9	9	6	9	9	7	7	3	5	9	3	9	9	9	4	5	3	8	4
1	174	18	1	65	1.65	23.8751	2	3				7	3	5	2	8	5	9	1	6	3	5	5	7	7	4	1	3	5	7	4	5	6
1	175	19	1	70	1.63	26.3465	3	3				7	3	5	3	6	5	3	2	3	5	5	5	9	5	7	2	1	5	5	1	5	5
1	176	21	1	62	1.6	24.2187	2	3				9	6	5	5	9	9	7	5	3	5	5	5	7	5	5	4	1	5	6	5	5	5
1	177	18	1	60	1.7	20.7612	2	3				3	7	5	7	9	5	4	7	4	5	5	5	5	7	9	3	3	5	2	7	7	6
1	179	19	1	65	1.63	24.4646	2	3				3	5	7	8	8	5	3	5	3	4	5	5	5	5	3	3	1	7	8	5	3	7
1	180	20	1	61	1.7	21.1073	2	3				4	5	5	5	6	5	4	4	2	5	5	5	5	6	4	3	2	7	3	5	4	6
1	181	20	1	54	1.55	22.4766	2	3				7	5	5	5	7	7	5	5	7	5	5	5	5	5	7	7	5	7	8	6	5	7
1	182	18	1	59	1.61	22.7615	2	3				7	7	3	6	9	5	5	5	4	3	5	6	7	5	4	4	3	5	5	5	6	5
1	183	20	1	40	1.57	16.2278	1	3				3	3	5	5	2	5	3	3	2	3	5	5	4	5	2	2	2	4	1	5	3	5
1	184	19	1	52	1.58	20.83	2	3				4	5	5	5	3	7	3	3	3	4	5	5	7	3	4	4	3	5	5	5	5	6
1	185	20	1	50	1.53	21.3593	2	2				4	4	6	4	8	6	7	2	4	3	4	4	7	5	7	3	3	8	7	3	5	5
1	186	18	1	64	1.7	22.1453	2	1				2	5	5	4	1	8	4	5	5	4	9	6	9	6	3	3	1	5	1	9	4	6
1	187	18	1	48	1.6	18.75	2	3				2	5	5	5	9	5	5	3	1	3	5	5	7	5	3	1	1	5	1	5	5	5
1	188	18	1	50	1.64	18.5901	2	3				5	5	6	4	1	9	5	4	1	4	5	5	5	7	1	4	1	1	1	5	2	5
1	189	19	1	69	1.57	27.993	3	3				7	7	5	8	9	7	8	3	8	5	5	5	9	7	5	6	7	5	7	5	7	7
1	190	18	1	55	1.63	20.7008	2	2				8	8	5	1	1	5	8	1	1	5	5	5	8	5	1	1	1	5	1	5	5	5
1	191	20	1					2				7	5	4	5	9	5	6	3	4	2	5	5	6	4	4	3	1	5	5	1	5	5
1	192	20	0	68	1.82	20.5289	2	3				5	5	5	5	5	5	5	5	5	5	5	5	5	5	5	5	5	5	5	5	5	5
1	193	20	0	110	1.83	32.8466	4	2				7	8	5	5	7	5	3	4	1	5	5	5	5	5	6	7	2	3	1	5	5	5
1	194	19	1	59	1.53	25.204	3	2				9	9	5	5	7	6	7	3	3	3	7	3	2	6	3	3	7	3	4	5	2	5
1	195	23	1	75	1.75	24.4898	2	1				7	8	5	5	9	5	5	8	5	4	5	5	8	5	5	8	3	5	8	5	4	5
1	196	19	1	70	1.65	25.7117	3	2				1	5	5	5	9	9	5	5	9	1	9	9	5	9	1	1	1	9	1	5	5	9
1	197	20	1	52	1.6	20.3125	2	2				8	8	5	5	8	5	8	5	8	5	5	5	8	5	8	8	5	5	2	7	5	5
1	200	22	1	45	1.6	17.5781	1	2				7	5	5	5	7	5	8	6	9	5	5	5	5	5	5	5	5	5	5	5	5	5
1	202	20	1	55	1.66	19.9594	2	3				7	4	5	4	9	7	4	5	7	5	5	5	7	7	4	4	4	5	5	7	5	5
1	203	21	1	48	1.58	19.2277	2	3				5	6	5	6	7	5	6	6	5	5	5	5	5	5	1	1	1	1	1	5	5	5
1	204	21	1	66	1.62	25.1486	3	2				6	2	5	1	8	5	6	4	7	1	5	5	7	5	2	4	3	5	6	5	5	5
1	206	20	1	49	1.74	16.1844	1	3				2	2	5	5	1	6	3	3	2	5	5	5	5	5	1	1	1	5	2	5	5	5
1	208	22	1	51	1.63	19.1953	2	2				9	9	6	8	9	5	6	4	4	4	5	5	9	5	4	9	8	5	8	5	8	5
1	209	20	1	56	1.63	21.0772	2	3				4	2	2	3	1	1	2	2	2	2	7	5	5	5	1	1	1	1	5	5	5	5
1	210	22	1	89	1.73	29.737	3	3				8	8	2	6	9	6	8	8	9	6	2	2	9	6	9	7	4	4	9	4	6	4
1	212	21	0	78	1.69	27.31	3	3				5	5	4	3	6	5	4	5	6	5	7	5	5	5	3	3	4	3	5	6	5	5
1	213	20	0	100	1.75	32.6531	4	3				5	5	5	3	3	7	4	3	5	1	7	5	7	5	3	3	1	5	5	5	1	5
1	214	22	0	66	1.72	22.3094	2	2				4	4	5	5	8	6	4	4	3	4	5	6	4	5	8	5	2	6	5	5	4	6
1	215	22	1	48	1.54	20.2395	2	3				7	4	5	4	9	5	8	2	3	2	6	5	8	7	8	4	2	9	3	3	4	5
1	216	23	0	72	1.7	24.9135	2	3				7	4	5	4	6	6	4	4	2	3	7	7	8	6	4	4	3	7	7	6	3	5
1	217	21	1	50	1.65	18.3655	1	2				7	7	5	5	8	5	8	4	3	3	5	5	7	5	8	8	3	8	2	6	7	5
1	218	20	0	87	1.87	24.8792	2	2				4	5	5	5	6	6	4	9	4	5	5	5	5	6	5	4	4	5	4	5	4	5
1	219	24	1	54	1.64	20.0773	2	2				4	5	5	6	2	5	5	5	5	5	8	5	5	5	5	1	1	5	1	5	5	5
1	221	20	0	65	1.75	21.2245	2	3				1	3	5	1	3	5	3	7	1	5	5	5	5	5	1	2	1	5	1	5	5	5
1	222	22	0	76	1.7	26.2976	3	2				6	6	6	4	3	8	3	3	5	2	8	5	8	8	5	3	3	7	7	7	5	8
1	224	20	0	80	1.82	24.1517	2	3				2	4	5	4	6	5	6	2	1	2	7	5	7	5	4	4	2	6	1	6	4	6
1	225	20	0	86	1.9	23.8227	2	3				5	5	5	5	5	5	5	5	5	5	5	5	5	5	5	5	5	5	5	5	5	5
1	226	21	1	63	1.69	22.0581	2	2				9	7	5	5	3	5	6	2	7	2	5	5	7	5	7	4	2	5	4	5	7	5
1	227	18	1	67	1.67	24.0238	2	2				6	5	5	5	7	8	8	5	7	5	5	5	6	5	5	5	5	7	7	5	5	5
1	228	21	1	61	1.59	24.1288	2	2				9	9	2	5	9	2	9	6	9	5	4	4	9	2	9	9	8	9	9	3	8	5
1	229	20	1	57	1.68	20.1956	2	3				1	6	5	6	8	5	8	5	2	1	5	5	8	5	5	6	1	7	2	5	5	5
1	230	20	0	65	1.69	22.7583	2	2				5	4	4	5	7	5	5	6	5	5	6	5	7	5	5	5	5	5	4	4	5	7
1	231	18	1	54	1.62	20.5761	2	3				8	3	5	3	9	5	7	6	7	1	6	5	8	5	5	1	1	8	4	5	1	7
1	232	19	1	48	1.65	17.6309	1	2				8	7	5	2	6	7	7	6	2	3	5	5	8	8	1	2	2	8	6	8	5	8
1	233	20	1	62	1.6	24.2187	2	3				8	7	2	5	9	5	6	1	9	5	5	5	9	5	8	6	1	5	5	5	5	5
1	234	19	1	58	1.62	22.1003	2	3				7	7	3	5	9	5	5	3	3	5	5	5	5	5	2	3	3	5	5	5	5	8
1	237	24	1	51	1.63	19.1953	2	2				8	7	5	7	9	6	7	4	8	1	4	6	6	5	6	7	1	7	9	2	7	4
1	238	19	0	64	1.76	20.6612	2	2				7	7	6	4	9	8	8	5	8	7	6	5	9	7	7	7	4	8	8	7	4	5
1	239	23	1	51	1.69	17.8565	1	2				8	7	5	7	9	5	7	2	2	5	5	5	2	5	8	7	7	5	3	5	5	6
1	240	19	0	78	1.81	23.8088	2	3				5	6	7	6	8	8	4	4	3	1	6	7	8	8	1	1	1	5	4	5	4	8
1	242	18	1	50	1.7	17.301	1	3				4	4	5	5	2	5	5	2	4	5	5	5	4	5	1	5	3	5	5	5	5	5
1	245	18	1	55	1.65	20.202	2	3				4	4	5	6	9	6	4	3	6	5	5	5	9	5	4	5	4	7	2	6	5	5
1	246	22	1	51	1.65	18.7328	2	3				7	4	3	6	8	5	4	4	7	4	6	5	6	6	7	4	3	6	4	6	5	4
1	248	21	1	53	1.68	18.7783	2	2				6	5	5	5	6	5	6	6	5	5	6	6	6	6	5	5	3	5	5	6	3	5
1	249	22	1	56	1.58	22.4323	2	2				8	5	6	6	6	6	6	6	6	6	6	6	6	6	6	9	9	9	9	6	8	6
1	250	21	0	75	1.75	24.4898	2	3				6	5	7	6	7	8	5	6	5	5	7	7	7	7	6	7	6	7	6	6	7	7
1	251	23	1	60	1.65	22.0386	2	3				6	6	5	6	9	3	7	7	6	1	5	5	6	6	9	6	5	5	9	5	6	5
1	252	22	1	70	1.6	27.3437	3	2				5	7	5	5	9	7	5	5	5	2	2	5	9	5	5	2	2	5	2	7	5	5
1	254	23	1	58	1.65	21.3039	2	3				1	1	5	1	1	9	5	5	1	2	8	9	1	5	1	1	1	1	1	3	3	5
1	256	24	1	70	1.66	25.4028	3	2				4	4	5	4	6	5	4	4	4	4	5	6	6	5	4	4	4	5	1	5	4	5
1	258	18	0	81	1.75	26.449	3	3				9	5	6	5	5	6	5	4	6	5	6	5	5	5	4	5	5	5	4	5	4	6
1	259	19	0	74	1.75	24.1633	2	3				6	6	5	4	6	5	5	5	5	5	6	5	6	5	4	6	4	4	4	6	5	5
1	260	18	1	64	1.65	23.5078	2	2				9	3	3	5	3	7	3	3	3	5	5	5	7	7	8	2	2	2	9	4	6	4
1	261	20	1	50	1.58	20.0288	2	3				2	4	5	5	7	5	5	4	7	3	5	5	6	5	2	2	2	4	1	5	5	5
1	262	19	1	65	1.67	23.3067	2	3				2	2	5	7	9	5	2	5	2	5	5	5	5	5	4	3	3	5	1	6	5	5
1	264	21	0	72	1.72	24.3375	2	3				1	1	7	4	1	8	1	5	1	5	7	7	7	7	1	1	1	9	1	7	1	8
1	266	20	1	54	1.67	19.3625	2	3				1	4	8	5	3	5	5	5	3	5	5	5	8	5	3	1	1	5	2	6	5	5
1	267	20	1	43	1.53	18.369	1	3				3	3	5	9	7	5	6	5	6	1	5	4	5	1	1	1	1	1	1	5	1	5
1	268	23	0	128	1.8	39.5062	4	2				8	8	5	5	9	5	7	5	9	4	5	4	8	5	5	4	2	5	8	2	1	5
1	269	19	1	69	1.63	25.9701	3	3				2	3	5	7	8	6	4	5	2	1	5	5	2	5	8	1	4	5	2	6	4	6
1	270	20	1	46	1.6	17.9687	1	2				7	7	5	8	9	5	7	5	7	7	5	5	7	5	7	7	7	8	7	7	8	5
1	271	22	1	60	1.68	21.2585	2	2				3	3	5	1	1	5	3	6	5	1	5	5	5	3	1	1	1	5	5	5	5	5
1	273	18	1	48	1.56	19.7239	2	3				7	3	5	3	8	6	6	4	8	5	5	5	3	6	7	8	4	6	6	5	5	8
1	274	20	1	62	1.7	21.4533	2	2				7	7	5	5	8	5	7	5	7	5	8	5	7	5	7	3	1	5	3	5	3	6
1	275	18	1	63	1.52	27.268	3	2				8	7	5	7	7	7	8	5	7	5	5	5	6	5	7	6	2	5	6	5	4	5
1	276	18	1	48	1.53	20.5049	2	3				6	2	5	5	1	6	4	8	6	4	8	7	7	5	4	4	2	6	5	6	5	7
1	277	19	1	60	1.67	21.5139	2	3				1	3	5	5	5	5	8	4	1	4	5	5	9	5	9	4	2	5	1	5	4	7
1	278	18	1	69	1.67	24.7409	2	3				5	9	5	9	9	5	5	3	5	3	5	5	3	5	9	5	3	5	5	5	3	5
1	279	18	1	54	1.59	21.3599	2	2				9	9	5	1	1	5	1	2	1	4	5	5	5	5	1	1	1	4	1	5	9	9
1	282	18	1	65	1.6	25.3906	3	3				7	7	5	2	7	5	3	3	3	1	5	5	6	5	7	1	1	7	1	5	4	5
1	283	18	1					3				5	5	7	5	1	7	5	5	1	3	9	5	7	5	1	3	1	2	5	7	5	7
1	284	18	1	52	1.65	19.1001	2	3				1	1	5	1	1	5	1	9	1	5	5	5	5	1	5	1	1	1	9	5	5	5
1	285	18	0	56	1.68	19.8413	2	3				3	2	5	2	7	5	6	5	3	5	5	5	7	5	7	2	2	5	5	4	3	5
1	286	18	1	62	1.64	23.0518	2	2				9	4	5	3	9	5	4	3	9	1	5	5	1	5	1	3	1	5	5	5	9	5
1	287	22	0	70	1.74	23.1206	2	1				4	2	5	1	7	9	6	1	4	1	9	9	9	9	4	2	1	6	4	9	1	7
1	288	18	1	62	1.61	23.9188	2	3				6	6	5	6	9	5	9	6	7	5	5	5	6	5	7	5	4	5	6	6	5	5
1	290	20	1	62	1.55	25.8065	3	1				5	9	5	9	7	5	5	4	3	5	5	5	5	5	5	5	3	4	5	5	5	5
1	292	18	0	63	1.75	20.5714	2	2				8	3	7	3	1	8	8	2	7	4	6	5	7	5	4	4	4	5	5	6	5	5
1	293	18	0	76	1.83	22.694	2	3				8	8	5	8	8	4	8	8	8	5	7	5	3	5	5	5	5	5	5	5	5	5
1	294	19	0	103	1.93	27.6517	3	3				1	1	5	5	8	5	1	3	1	1	5	8	7	9	1	1	1	5	1	5	5	8
1	298	18	1	64	1.63	24.0882	2	3				6	5	5	5	7	5	5	5	6	5	5	5	5	5	7	5	5	7	5	5	4	6
1	301	18	0	60	1.83	17.9163	1	3				7	6	5	5	7	5	4	8	8	4	5	5	3	5	4	5	6	5	6	5	7	5
1	302	21	0	67	1.65	24.6097	2	3				5	7	7	7	7	5	3	3	5	2	5	5	5	5	3	3	3	5	5	5	8	5
1	304	18	1	80	1.73	26.7299	3	2				5	5	5	5	6	5	5	4	4	5	5	5	7	5	5	5	3	5	5	5	5	5
1	305	19	1	46	1.5	20.4444	2	3				5	4	5	5	6	5	5	4	4	5	5	5	5	5	4	4	3	5	2	5	4	5
1	306	18	1	75	1.7	25.9516	3	3				8	5	5	5	9	5	6	4	7	5	5	5	5	5	6	4	2	5	5	5	4	5
1	307	18	1	63	1.57	25.5588	3	2				3	5	5	5	8	5	5	4	4	5	5	5	4	5	6	4	2	5	3	6	2	6
1	308	18	0	79	1.65	29.0174	3	2				7	6	5	4	8	5	8	3	5	2	5	5	8	5	7	3	4	5	3	3	2	5
1	309	18	1	54	1.71	18.4672	1	3				1	3	5	5	1	5	5	6	4	5	5	5	4	5	2	1	1	4	1	5	5	5
1	310	19	1	74	1.87	21.1616	2	3				5	5	6	3	1	5	5	3	5	1	5	5	5	5	1	2	1	3	3	5	5	5
1	312	23	0	76	1.8	23.4568	2	2				8	5	5	2	2	5	8	5	8	2	5	4	7	3	1	4	1	1	6	5	3	5
1	313	18	0	79	1.84	23.3341	2	3				5	5	6	5	6	7	5	5	5	5	5	5	5	5	5	4	5	7	5	5	3	6
1	314	18	0	60	1.73	20.0474	2	3				2	5	5	5	3	7	5	4	2	4	8	5	9	5	2	1	3	5	2	8	5	6
1	315	19	1	54	1.62	20.5761	2	3				3	7	5	5	9	3	7	3	3	5	5	5	8	5	8	7	1	3	2	5	5	5
1	316	18	0	55	1.7	19.0311	2	3				6	6	5	7	4	5	7	6	8	5	5	5	5	5	8	5	6	5	5	3	7	5
1	317	19	1	59	1.7	20.4152	2	2				4	4	7	6	3	7	2	8	2	6	7	7	7	5	1	2	2	7	7	3	4	5
1	318	18	0	70	1.75	22.8571	2	3				5	5	5	5	5	5	5	5	5	5	5	5	5	5	1	5	5	5	5	5	5	5
1	319	18	0	70	1.8	21.6049	2	3				2	2	5	2	1	6	4	3	1	1	5	7	5	8	1	1	1	5	1	7	5	7
1	320	18	0	64	1.78	20.1995	2	3				4	6	5	4	6	6	5	4	5	4	8	5	6	5	4	4	3	5	5	6	5	6
1	321	19	1	48	1.62	18.2899	1	2				7	7	5	5	3	5	5	5	6	5	6	5	8	5	5	5	5	7	9	5	5	6
1	321	18	1	49	1.56	20.1348	2	3				6	7	6	4	9	9	6	3	5	3	6	8	9	7	7	5	3	5	6	9	9	9
1	322	18	1	65	1.6	25.3906	3	2				7	7	5	6	6	7	7	3	7	5	6	5	7	6	3	6	5	5	7	6	4	5
1	322	18	0	67	1.77	21.3859	2	3				4	4	7	7	9	5	4	3	3	3	5	5	9	8	5	5	5	5	5	6	6	5
1	324	19	0	98	1.9	27.1468	3	2				1	1	3	1	1	3	1	1	1	1	5	1	3	3	1	1	1	1	1	5	1	5
1	324	20	1	80	1.64	29.7442	3	3				7	7	5	5	7	5	6	3	6	5	5	5	5	5	5	5	5	5	5	5	5	5
1	325	20	1	75	1.57	30.4272	4	3				7	4	6	5	8	5	4	2	6	1	5	3	9	5	7	5	5	5	6	9	5	5
1	325	18	1	56	1.59	22.151	2	3				7	7	5	5	9	5	8	5	9	5	5	5	9	5	3	6	4	7	8	5	6	5
1	326	18	1	55	1.57	22.3133	2	2				4	4	5	4	5	5	6	4	8	4	7	6	6	7	6	4	3	2	4	5	4	6
1	327	18	1	65	1.61	25.0762	3	2				1	3	5	3	8	5	7	4	2	3	5	5	8	5	8	2	1	6	9	5	4	5
1	327	18	1	79	1.65	29.0174	3	3				4	3	5	3	9	6	3	5	4	5	7	5	7	5	6	5	3	5	4	2	7	5
1	328	19	1	64	1.66	23.2254	2	2				4	3	5	5	6	6	5	4	4	6	5	5	3	5	4	3	3	7	7	7	3	5
1	328	18	1	63	1.63	23.7118	2	3				3	5	5	7	5	5	6	4	3	5	5	5	5	5	5	5	4	5	5	5	4	5
1	329	21	1	60	1.7	20.7612	2	3				3	3	5	5	3	5	4	6	3	5	5	5	5	5	3	3	3	5	5	5	5	5
1	330	23	0	53	1.75	17.3061	1	2				3	5	5	3	5	5	5	3	3	5	5	5	5	5	3	1	3	5	4	5	4	5
1	330	20	0	71	1.81	21.6721	2	2				5	5	5	5	5	5	5	5	5	5	5	5	5	5	5	5	5	5	5	5	5	5
1	331	21	0	58	1.61	22.3757	2	3				1	1	1	1	5	1	1	1	1	5	5	1	1	1	1	1	1	1	1	5	1	8
1	332	18	0	84	1.8	25.9259	3	2				3	8	5	9	9	7	7	3	3	7	5	5	9	7	3	9	7	5	5	3	7	8
1	332	18	1	63	1.67	22.5896	2	3				8	7	6	7	5	7	5	4	3	2	3	6	5	5	2	1	2	7	2	6	4	6
1	333	19	1	89	1.73	29.737	3	3				9	7	5	3	8	5	4	8	9	4	5	5	8	8	8	3	9	5	5	5	7	5
1	334	19	1	53	1.57	21.5019	2	2				4	5	5	4	6	6	4	3	3	5	5	5	4	6	4	4	3	5	4	5	5	6
1	335	18	0	77.6	1.86	22.4303	2	3				7	6	5	2	8	5	3	2	7	1	5	5	2	5	8	1	1	5	5	1	2	5
1	336	19	1	78	1.63	29.3575	3	2				9	6	5	5	9	5	8	5	9	5	5	5	3	3	9	2	1	1	1	3	3	3
1	338	19	1	67	1.62	25.5296	3	2				2	3	5	6	7	4	6	2	2	1	7	6	9	4	8	6	4	3	5	2	3	3
1	338	21	1	56	1.58	22.4323	2	2				9	9	1	1	5	1	1	1	9	1	5	5	9	5	1	1	1	5	2	5	1	5
1	339	19	1	52	1.64	19.3337	2	3				2	1	5	2	1	9	1	5	2	1	9	9	9	9	1	1	1	1	1	9	1	9
1	339	19	1	61	1.64	22.68	2	3				7	7	5	5	7	6	5	3	6	2	5	5	6	5	6	5	2	5	5	6	4	5
1	340	19	1	69	1.59	27.2932	3	3				9	9	3	9	9	6	9	6	9	5	3	3	8	6	9	9	9	5	9	3	9	5
1	341	19	1	65	1.7	22.4913	2	2				1	3	5	5	2	5	1	1	1	3	5	5	1	5	2	2	1	5	5	1	1	5
1	341	18	1	69	1.7	23.8754	2	3				1	2	7	5	1	8	2	1	1	3	8	9	2	5	1	1	1	1	5	3	4	8
1	342	18	0	64	1.68	22.6757	2	1				9	7	5	4	9	8	5	5	3	5	8	5	7	5	4	7	8	8	3	5	5	5
1	342	18	1	56	1.65	20.5693	2	3				4	5	5	4	6	5	5	5	5	5	4	5	6	6	3	5	3	5	5	6	4	5
1	343	18	0	97	1.78	30.6148	4	2				3	3	5	6	7	5	4	7	3	3	5	5	6	5	4	6	5	3	7	8	4	6
1	343	18	1	57	1.72	19.2672	2	3				7	5	5	7	9	5	9	5	5	5	5	5	5	5	9	5	1	5	6	6	5	5
1	344	18	1	72	1.59	28.4799	3	2				8	9	8	7	8	5	8	5	7	5	5	4	7	6	5	5	4	5	5	4	5	5
1	344	19	1	63	1.63	23.7118	2	3				4	4	4	5	1	5	6	7	1	1	7	5	5	7	3	5	2	4	5	7	2	7
1	345	18	1	62	1.66	22.4996	2	2				7	7	5	6	7	5	7	5	8	5	5	5	7	5	4	7	3	5	5	5	3	5
1	346	18	1	62	1.65	22.7732	2	3				8	5	5	4	7	6	4	5	6	3	5	6	5	6	6	4	2	5	3	4	4	6
1	347	19	1	76	1.6	29.6875	3	2				3	7	5	1	9	5	7	1	1	1	5	5	6	3	1	7	1	5	1	5	3	5
1	348	18	1	50	1.67	17.9282	1	3				2	5	5	2	1	7	5	2	2	5	7	5	3	5	1	2	2	5	5	6	2	7
1	349	18	1	75	1.68	26.5731	3	3				9	9	5	1	9	5	4	5	9	5	5	5	5	5	9	5	1	5	5	4	5	5
1	350	18	0	52	1.64	19.3337	2	2				5	5	5	5	5	5	5	5	5	5	5	5	5	5	5	5	5	5	5	5	5	5
1	350	18	1	50	1.55	20.8117	2	3				7	5	5	4	7	4	8	8	8	6	5	5	6	5	6	4	6	5	5	4	5	5
1	351	21	0	72	1.78	22.7244	2	2				5	5	7	7	8	7	5	3	5	5	6	3	6	6	7	7	3	5	6	5	7	6
1	351	20	1	50	1.56	20.5457	2	3				5	3	5	5	5	5	5	2	5	5	5	5	5	5	9	5	5	5	5	5	5	5
1	352	20	1	55	1.57	22.3133	2	3				7	5	3	1	9	5	5	5	8	2	2	2	5	5	4	3	1	5	1	5	2	5
1	352	18	1	48	1.56	19.7239	2	3				4	4	6	6	4	7	3	5	4	3	7	7	6	7	3	3	3	6	3	6	4	6
1	353	19	1	90	1.7	31.1419	4	2				9	4	5	5	9	5	6	5	4	6	5	5	9	5	7	5	7	5	5	6	5	5
1	354	21	1	64	1.68	22.6757	2	2				6	5	3	6	6	5	4	3	2	1	5	5	5	5	2	1	1	5	5	5	3	5
1	354	20	0	70	1.72	23.6614	2	3				7	5	6	4	5	5	4	3	9	3	5	5	8	5	3	4	5	5	4	3	8	5
1	355	18	1	49.8	1.65	18.292	1	2				2	3	5	7	9	5	4	1	1	5	5	5	8	5	3	7	4	5	5	5	4	5
1	355	18	1	64	1.73	21.3839	2	3				1	2	5	9	8	5	8	5	1	5	7	5	3	7	3	5	5	5	5	7	3	9
1	356	18	0	82	1.72	27.7177	3	3				3	4	5	6	6	5	5	2	3	5	5	5	5	5	6	5	2	5	5	5	5	5
1	357	20	0	80	1.67	28.6851	3	3				3	5	7	4	8	7	6	4	5	3	6	5	6	8	5	5	5	5	5	7	5	8
1	359	18	1	80	1.64	29.7442	3	3				7	5	5	5	9	5	6	3	5	5	2	3	5	5	5	5	5	5	5	5	5	5
1	360	19	1	85	1.67	30.478	4	3				3	3	5	2	8	6	6	4	3	3	5	6	7	8	4	3	1	7	3	7	4	5
1	361	21	1	65	1.7	22.4913	2	2				5	3	9	1	9	5	5	1	1	5	5	5	1	5	1	1	1	5	5	5	5	5
2	3	22	0	83	1.7	28.7197	3	2	1	3	1	1	3	5	4	7	6	3	5	1	5	5	5	5	6	4	6	3	5	2	4	3	6
2	4	22	0	70	1.81	21.3669	2	1	1	2	1	6	5	5	6	7	6	4	5	4	3	5	6	6	5	4	3	4	4	5	4	3	5
2	5	21	1	74	1.7	25.6055	3	2	1	3	1	7	7	2	6	8	5	6	5	5	1	5	4	6	3	1	1	1	1	9	5	3	3
2	6	24	0	85	1.83	25.3815	3	1	1	3	1	8	8	3	8	8	3	4	7	8	3	3	3	7	3	5	6	6	3	8	3	7	2
2	8	21	0	63	1.66	22.8625	2	1	1	3	1	5	5	5	9	8	5	7	5	6	3	5	5	5	4	5	3	4	5	3	5	5	5
2	10	23	1	66	1.74	21.7994	2	2	1	3	1	5	5	5	5	7	5	5	7	7	7	7	5	7	5	4	4	4	6	7	6	4	7
2	12	22	1	89	1.58	35.6513	4	1	1	3	1	5	5	5	5	6	5	5	4	3	2	6	5	2	5	4	2	2	5	2	5	5	5
2	13	23	1	98	1.69	34.3125	4	1	1	2	1	7	6	3	5	7	5	6	4	4	2	7	5	7	5	1	3	2	5	5	5	4	3
2	15	20	0					2	1	1	1	4	3	5	4	2	7	4	5	3	5	7	7	7	5	2	3	2	7	3	7	5	6
2	16	18	0	65.9	1.78	20.7991	2	2	1	1	1	6	5	5	5	6	5	4	3	3	5	5	4	5	5	6	3	3	5	5	6	3	5
2	19	24	0	117	1.87	33.4582	4	2	1	2	1	3	3	5	7	7	5	5	5	3	3	3	5	5	5	3	7	1	1	1	3	3	3
2	20	20	0	75	1.81	22.8931	2	2	0	2	1	2	2	5	2	2	5	5	6	2	5	5	6	5	5	3	2	2	7	2	5	4	6
2	22	21	1	51	1.62	19.433	2	1	1	2	1	4	4	5	5	2	5	3	3	4	5	5	7	6	5	3	2	2	5	1	5	5	5
2	23	23	1	59	1.61	22.7615	2	1	1	3	1	7	7	4	7	8	7	7	2	6	3	4	3	8	7	7	7	7	7	8	6	6	6
2	24	22	1	75	1.68	26.5731	3	2	1	1	1	6	6	5	7	9	5	7	5	9	5	5	5	7	5	9	5	7	5	7	6	5	7
2	25	22	0	75	1.73	25.0593	3	2	1	3	1	2	2	7	2	5	6	2	6	2	1	6	1	9	6	1	1	2	6	2	2	2	7
2	26	21	0	85	1.8	26.2346	3	1	1	3	1	5	5	9	5	9	9	5	5	5	5	9	5	5	5	5	5	5	1	1	1	9	9
2	27	21	1	47	1.54	19.8178	2	2	0	2	1	7	5	5	3	7	6	3	3	7	2	6	5	7	5	3	3	2	5	7	5	3	7
2	28	21	0	72	1.79	22.4712	2	2	1	2	1	5	5	5	5	7	9	5	3	3	1	9	9	5	7	3	1	1	5	5	6	5	9
2	29	24	0	82	1.75	26.7755	3	1	1	3	1	7	3	5	3	1	9	2	5	1	5	6	5	5	7	2	9	1	3	7	5	3	8
2	30	21	0	64	1.76	20.6612	2	1	1	3	1	2	3	5	6	3	5	7	4	1	1	6	5	6	7	3	2	1	5	3	6	3	6
2	31	22	1	57	1.73	19.0451	2	3	1	3	1	6	7	3	5	8	5	6	1	2	3	5	2	3	5	4	2	2	5	6	3	5	6
2	32	22	1	59	1.6	23.0469	2	2	1	3	1	9	8	5	4	9	5	7	5	7	3	5	5	8	5	9	4	5	5	1	5	5	5
2	33	22	0	70	1.75	22.8571	2	2	0	2	0	5	5	5	5	5	5	5	5	5	5	5	5	5	5	5	5	5	5	5	5	5	5
2	34	22	1	54	1.62	20.5761	2	2	1	1	1	2	7	6	5	7	5	7	2	2	4	5	6	4	6	7	3	2	5	3	6	4	5
2	35	21	1	52	1.6	20.3125	2	1	1	3	1	3	5	5	5	1	5	2	3	1	5	5	5	5	5	2	1	1	5	4	5	4	5
2	38	24	0	94	1.86	27.1708	3	1	1	1	1	9	9	5	7	9	5	8	5	3	4	4	5	5	5	5	7	6	7	5	5	7	5
2	41	24	1	54	1.6	21.0937	2	1	1	3	1	8	9	5	4	9	6	9	4	9	2	4	6	5	7	2	3	3	5	6	4	8	7
2	42	24	1	75	1.74	24.7721	2	3	1	1	1	7	5	4	5	8	5	5	2	3	5	5	4	5	3	3	7	5	2	2	3	5	5
2	43	20	1	60	1.74	19.8177	2	2	1	3	1	9	5	5	4	9	6	3	5	3	3	9	8	8	7	8	4	5	3	1	2	9	5
2	44	20	0	60	1.63	22.5827	2	2	1	1	1	1	6	5	7	1	5	3	1	1	5	7	7	2	5	7	1	1	7	1	5	4	6
2	47	18	1	82	1.64	30.4878	4	1	1	3	1	1	1	5	5	9	5	6	1	1	9	9	5	1	5	6	2	1	1	6	5	2	5
2	48	24	1	75	1.74	24.7721	2	3	1	1	1	7	5	4	5	8	5	5	2	3	5	5	4	5	3	3	7	5	2	2	3	5	5
2	49	22	1	54	1.5	24	2	2	1	1	1	7	7	5	7	7	6	7	3	7	5	5	5	4	5	5	8	3	5	3	5	4	6
2	50	23	0	80	1.86	23.1241	2	1	1	2	1	3	4	6	4	2	8	4	3	4	6	5	7	4	4	3	8	3	5	7	7	2	6
2	51	23	1	65	1.7	22.4913	2	1	1	3	1	7	6	5	5	9	5	9	5	5	5	5	5	7	5	3	3	5	5	7	4	5	5
2	52	24	0	83	1.76	26.7949	3	1	0	2	0	5	5	5	5	5	5	5	5	5	5	6	5	5	5	5	5	5	5	5	5	5	5
2	53	23	1	127	1.73	42.4338	4	3	1	2	1	7	7	5	5	8	6	7	5	5	5	3	5	5	6	4	4	6	5	5	3	7	5
2	54	23	1	83	1.65	30.4867	4	1	1	3	1	3	2	6	3	7	7	3	7	2	2	7	7	6	6	3	1	1	7	3	7	3	6
2	56	20	0	80	1.78	25.2493	3	3	1	3	1	4	6	5	6	8	5	7	2	2	5	6	5	7	5	1	4	4	5	2	5	6	5
2	57	24	1	45	1.59	17.7999	1	2	1	3	1	8	2	5	2	1	8	1	4	8	1	8	5	5	5	1	1	1	3	1	7	3	7
2	58	21	1	55	1.64	20.4491	2	1	1	3	1	1	2	5	7	1	7	6	6	1	1	8	5	6	5	1	1	1	6	1	6	1	7
2	59	20	1	70	1.65	25.7117	3	3	1	3	1	9	4	3	4	9	5	8	9	9	4	3	3	3	3	7	2	2	1	9	2	3	5
2	60	20	0	55	1.76	17.7557	1	3	1	1	1	3	5	5	4	4	6	5	3	4	3	6	5	2	6	4	4	3	5	4	4	5	5
2	63	21	1	43	1.61	16.5889	1	2	1	2	1	7	5	4	7	8	4	5	2	4	4	7	6	5	5	2	5	2	5	2	8	2	6
2	64	24	0	85	1.72	28.7317	3	2	1	3	1	7	3	5	3	8	6	7	4	3	7	5	5	2	5	3	4	3	6	5	4	6	5
2	65	24	1	86	1.67	30.8365	4	1	1	3	1	9	5	3	5	9	7	9	2	2	5	5	5	3	5	2	1	1	5	1	5	1	5
2	67	23	1	48	1.58	19.2277	2	2	1	2	1	3	7	5	6	8	5	7	5	3	4	5	5	5	6	4	6	3	5	4	5	3	5
2	68	19	0	65	1.84	19.199	2	1	1	3	1	2	2	6	5	7	4	7	3	1	5	5	5	7	5	3	5	5	5	5	6	5	7
2	69	22	0	83	1.66	30.1205	4	1	1	1	1	2	2	5	5	7	5	3	6	2	1	6	6	4	5	2	1	2	5	5	4	2	6
2	71	20	0	62	1.75	20.2449	2	2	1	3	1	7	7	5	5	9	7	8	5	7	6	5	6	5	7	7	5	6	5	6	6	7	6
2	73	20	0	74	1.73	24.7252	2	1	0	2	1	7	7	5	5	4	5	6	3	3	5	5	5	7	5	4	6	2	5	5	5	4	6
2	75	23	1	71	1.6	27.7344	3	3	1	1	1	9	3	3	5	9	5	9	9	9	1	5	5	5	5	5	8	1	5	9	5	9	5
2	76	24	1	46	1.58	18.4265	1	1	1	1	1	3	3	5	5	7	6	3	4	3	4	5	5	5	5	6	4	3	7	4	5	4	5
2	77	22	1	55	1.6	21.4844	2	2	1	3	1	3	5	3	7	7	3	7	7	3	3	5	5	6	5	3	2	4	5	1	5	5	5
2	78	24	1	88	1.67	31.5537	4	3	1	3	1	5	5	4	1	5	6	4	1	3	2	5	5	1	5	7	1	1	9	1	5	9	2
2	80	23	0	66	1.7	22.8374	2	2	1	2	1	5	5	5	5	7	6	5	3	5	5	7	6	5	5	3	5	5	5	5	7	5	6
2	82	22	1	62	1.64	23.0518	2	1	1	2	1	4	4	7	2	9	5	3	5	2	2	5	5	7	5	1	1	1	5	4	6	3	5
2	83	20	1	76	1.78	23.9869	2	2	1	3	1	7	4	5	5	8	5	7	3	7	2	5	5	1	5	4	5	2	5	5	3	6	5
2	85	19	1	56	1.56	23.0112	2	2	1	1	1	3	5	5	5	7	5	6	4	2	5	5	5	5	5	4	3	2	7	4	5	5	5
2	86	24	1	58	1.68	20.5499	2	2	1	2	1	5	5	5	6	6	4	5	5	5	5	4	5	5	5	7	5	5	5	5	5	5	5
2	88	21	1	52	1.58	20.83	2	2	0	2	0	2	6	5	5	6	6	4	2	4	5	5	5	5	6	7	3	3	5	4	5	4	6
2	89	22	1	50	1.65	18.3655	1	1	1	3	1	2	2	4	4	7	7	4	7	2	1	7	7	3	7	6	2	1	5	6	2	7	8
2	90	24	1	57	1.71	19.4932	2	1	0	1	1	2	2	5	2	2	7	2	3	2	2	8	8	4	8	1	1	1	5	1	5	1	6
2	91	24	1	64	1.56	26.2985	3	1	1	1	1	1	1	5	5	6	6	7	5	8	5	6	5	8	5	3	1	1	9	1	5	5	5
2	92	24	1	52	1.56	21.3675	2	2	1	2	1	7	4	4	1	7	5	5	2	4	2	5	6	3	5	2	1	1	8	5	4	3	5
2	93	23	1	62.5	1.62	23.815	2	1	1	1	1	1	1	5	1	1	5	6	2	2	1	6	5	5	5	5	1	1	8	1	5	5	5
2	94	23	1	54	1.58	21.6311	2	2	1	1	1	6	2	5	4	3	7	6	4	3	2	6	6	3	5	2	3	2	7	5	4	5	5
2	95	23	1	48	1.62	18.2899	1	1	0	2	1	3	3	6	5	1	5	5	4	3	4	6	6	2	6	3	1	1	5	5	6	4	6
2	96	22	1	51	1.63	19.1953	2	1	0	2	0	2	2	5	5	6	5	5	3	3	5	5	5	3	5	5	5	5	5	5	5	5	5
2	97	22	0	67	1.69	23.4586	2	2	1	2	1	5	5	5	5	3	5	5	7	5	4	6	5	5	5	4	5	4	6	5	6	5	5
2	102	21	1	69	1.58	27.6398	3	3	1	1	1	5	5	5	5	7	5	6	5	5	5	5	6	7	5	3	3	3	2	7	8	3	5
2	104	21	1	50	1.6	19.5312	2	3	1	3	1	1	2	7	2	1	7	3	3	1	1	4	6	2	6	1	2	4	6	6	6	4	6
2	105	23	1	55	1.57	22.3133	2	2	1	2	1	1	1	5	3	6	7	5	4	4	3	6	7	8	6	3	1	1	3	1	5	6	5
2	106	19	0	60	1.84	17.7221	1	2	0	2	1	3	4	8	4	1	9	2	5	2	4	7	7	5	5	4	4	5	7	1	6	4	6
2	107	19	1	79	1.68	27.9904	3	2	1	3	1	1	2	5	8	9	7	7	3	1	2	9	5	5	8	8	2	2	9	1	4	5	7
2	108	21	1	53	1.54	22.3478	2	3	1	1	1	5	5	5	5	7	5	5	7	5	5	7	5	7	5	5	5	5	7	7	5	5	5
2	109	24	1	54	1.56	22.1893	2	2	1	3	1	9	4	5	2	1	5	7	4	9	4	5	5	8	5	4	2	1	5	7	5	3	5
2	111	21	0	78	1.72	26.3656	3	2	0	2	1	7	5	5	5	5	5	5	5	5	5	5	5	5	5	5	5	5	5	5	5	5	5
2	112	23	1	60	1.77	19.1516	2	2	1	1	1	1	2	5	5	8	5	5	3	1	1	5	5	5	5	6	2	4	6	1	5	5	5
2	116	22	1	65	1.56	26.7094	3	2	1	3	1	7	7	2	6	9	9	1	2	2	1	8	8	3	5	1	1	1	5	1	7	1	9
2	117	23	1	47	1.58	18.8271	2	2	1	3	1	7	3	5	5	7	5	5	2	8	1	5	5	5	5	5	5	1	9	1	5	1	5
2	118	24	1	48	1.57	19.4734	2	2	1	1	1	1	1	5	1	1	7	3	2	1	3	7	5	2	5	1	1	2	3	1	7	3	7
2	119	18	1	64	1.74	21.1389	2	1	1	3	1	3	5	5	5	7	5	5	5	3	5	5	5	5	5	5	5	3	5	5	3	5	6
2	122	21	1	60	1.65	22.0386	2	3	1	3	1	7	5	7	1	9	5	8	5	8	5	5	5	1	5	6	1	1	9	1	9	3	9
2	123	24	1	46	1.58	18.4265	1	1	1	1	1	3	3	5	5	7	6	3	4	3	4	5	5	5	5	6	4	3	7	4	5	4	5
2	124	23	1	44.5	1.54	18.7637	2	2	1	2	0	4	5	4	6	6	5	4	4	4	5	5	4	6	5	4	3	3	5	3	5	5	5
2	129	19	1	57	1.7	19.7232	2		1	3	1	4	5	6	5	7	5	4	5	4	5	5	6	5	5	4	5	3	7	6	6	5	5
2	130	19	1	62	1.65	22.7732	2	2	1	3	1	3	5	5	5	7	5	5	3	3	5	5	5	3	5	1	2	3	5	5	5	5	5
2	131	18	1	60	1.58	24.0346	2	2	1	2	1	5	5	5	5	3	5	5	3	2	5	5	5	5	5	5	5	1	5	5	4	5	5
2	132	24	1	58	1.63	21.83	2	2	1	3	1	1	6	5	7	8	7	7	7	3	3	5	7	7	5	8	7	2	2	1	6	6	8
2	133	19	1	64.8	1.62	24.6914	2	2	1	3	1	3	3	7	6	2	7	5	3	3	5	5	6	1	7	5	3	1	5	3	6	3	7
2	136	18	1	50.5	1.56	20.7512	2	3	1	3	1	7	3	5	4	8	5	7	2	2	5	6	6	5	7	7	3	3	5	2	5	5	6
2	137	24	1	48	1.57	19.4734	2	2	1	1	1	1	1	5	1	1	7	3	2	1	3	7	5	2	5	1	1	2	3	1	7	3	7
2	139	23	0	89	1.77	28.4082	3	1	1	3	1	9	9	5	1	9	9	9	9	9	5	7	5	7	9	9	1	1	5	5	5	5	5
2	140	23	1	39	1.5	17.3333	1	2	1	3	1	5	5	5	5	9	5	9	5	4	3	5	5	7	5	7	3	2	5	3	5	3	5
2	142	24	1	55	1.63	20.7008	2	1	1	3	1	9	9	1	9	9	5	9	9	9	8	4	8	6	8	2	2	2	8	8	8	2	8
2	143	23	1	70	1.55	29.1363	3	1	1	2	1	5	5	5	5	5	5	5	5	5	5	5	5	5	5	7	4	5	5	5	5	5	5
2	145	19	0	66	1.77	21.0667	2	3	1	1	1	3	5	7	5	4	6	5	5	2	5	8	8	6	5	6	7	3	3	7	5	5	6
2	146	20	0	64	1.66	23.2254	2	3	1	1	1	5	5	5	5	3	7	5	3	5	5	7	5	5	7	5	5	5	5	5	7	5	7
2	147	18	1	50	1.61	19.2894	2	3	1	3	1	8	7	2	3	9	7	8	1	7	1	5	5	8	3	7	1	1	5	5	2	4	2
2	148	19	1	60	1.53	25.6312	3	2	1	1	1	1	9	5	5	1	9	9	1	1	1	9	9	5	9	1	1	1	5	1	9	5	9
2	150	22	2	43	1.56	17.6693	1	1	1	3	1	7	3	5	3	9	5	9	4	9	5	5	5	5	6	4	4	1	6	9	6	5	6
2	151	23	1	89.6	1.68	31.746	4	1	1	3	1	7	7	5	7	9	5	7	5	3	3	5	5	1	5	9	6	3	1	5	5	3	5
2	152	20	1	57	1.72	19.2672	2	2	1	3	1	8	9	5	5	9	5	9	1	1	1	5	5	9	5	3	1	1	4	9	9	6	5
2	153	20	1	58	1.7	20.0692	2	2	1	3	1	7	7	5	7	9	7	7	9	8	5	5	5	7	7	9	5	6	5	6	5	5	7
2	154	20	0	103	1.84	30.423	4	3	1	3	1	4	5	5	5	6	6	5	3	2	4	7	5	4	5	2	5	5	5	5	3	5	5
2	155	18	1	52	1.67	18.6453	2	2	1	3	1	2	3	7	4	1	7	3	5	2	2	7	7	5	6	5	1	3	5	1	6	5	6
2	156	19	0	77	1.85	22.4982	2	2	1	3	1	6	5	5	4	6	7	5	7	5	4	7	5	7	5	7	5	5	5	5	6	5	7
2	157	18	1	62	1.64	23.0518	2	3	1	1	0	5	7	9	5	1	9	7	3	5	1	5	9	3	5	1	1	1	9	5	1	5	7
2	158	19	1	51.7	1.55	21.5193	2	3	1	2	1	5	5	5	5	6	5	5	5	5	5	5	5	5	5	6	5	3	5	5	5	4	5
2	159	18	0	110	1.85	32.1402	4	2	1	1	1	4	5	5	5	4	5	5	5	5	5	6	5	4	5	3	3	2	5	5	5	4	5
2	160	19	1	45	1.55	18.7305	2	3	1	3	1	7	7	6	3	3	5	7	8	7	2	5	6	7	7	3	3	2	7	8	6	4	6
2	161	18	1	61	1.67	21.8724	2	2	1	2	1	8	8	5	4	7	7	4	4	2	5	6	6	9	5	8	4	2	5	4	5	6	6
2	162	19	1	60	1.75	19.5918	2	1	1	1	1	1	2	6	2	1	8	4	5	3	8	9	9	9	8	1	1	1	1	1	7	5	7
2	163	18	0	110	1.85	32.1402	4	2	1	1	1	4	5	5	5	4	5	5	5	5	5	6	5	4	5	3	3	2	5	5	5	4	5
2	164	18	0	61	1.7	21.1073	2	2	1	3	1	3	3	5	7	3	9	3	5	1	3	8	9	5	6	3	1	1	7	1	8	4	5
2	165	18	1	54	1.51	23.6832	2	2	1	3	1	5	4	4	3	7	5	6	8	5	4	5	6	7	5	6	3	4	4	6	4	4	6
2	166	20		66				1	1	1	1	1	1	5	1	1	9	1	1	1	5	5	9	1	1	1	1	1	5	1	5	1	5
2	168	20	1	56	1.7	19.3772	2	2	1	3	1	2	2	6	2	1	7	7	8	1	6	9	9	9	9	1	1	1	2	1	8	1	8
2	169	21	1	58	1.69	20.3074	2	2	1	1	1	5	5	5	5	5	6	5	3	3	5	7	5	3	5	3	3	1	5	3	5	5	7
2	170	19	0	110	1.85	32.1402	4	2	1	1	1	4	4	5	5	4	5	5	4	3	5	5	5	4	5	3	5	3	5	5	5	4	5
2	171	19	1	52	1.51	22.806	2	3	1	3	1	9	9	9	9	9	9	9	9	9	9	9	9	9	9	9	9	9	9	9	9	9	9
2	172	20	0	74	1.78	23.3556	2	1	0	1	1	5	5	5	5	6	5	5	5	6	5	5	5	5	5	3	5	3	5	5	5	5	5
2	174	21	1	107	1.75	34.9388	4	1	1	1	1	9	1	5	1	9	5	9	9	9	1	6	5	9	5	1	2	7	7	9	9	9	7
2	175	18	1	53	1.58	21.2306	2	2	1	3	0	5	5	5	1	9	5	5	3	4	1	5	5	4	5	4	1	1	6	1	5	5	5
2	176	21	0	66	1.69	23.1084	2	2	1	3	1	7	7	3	8	6	5	6	6	6	7	7	1	8	1	5	5	5	5	5	7	5	5
2	177	18	0	59	1.75	19.2653	2	2	0	2	1	6	7	5	1	2	5	1	4	3	1	6	5	5	5	5	3	5	1	5	5	5	6
2	178	19	1	54	1.57	21.9076	2	2	1	3	1	5	5	5	4	3	6	4	4	4	3	6	6	5	5	4	4	4	5	5	4	4	6
2	179	21	0	66	1.69	23.1084	2	2	1	3	1	7	7	3	8	6	5	6	6	6	7	7	1	8	1	5	5	5	5	5	7	5	5
2	180	21	0	74	1.79	23.0954	2	1	0	3	1	7	5	5	5	9	6	5	4	5	5	6	5	5	5	3	3	3	7	5	5	4	5
2	181	20	1	82	1.7	28.3737	3	3	1	3	1	7	7	1	7	8	2	5	2	1	5	5	5	5	5	1	1	3	5	1	4	3	5
2	182	21	0	60.7	1.68	21.5065	2	2	0	2	0	5	1	4	1	7	4	2	9	3	1	1	5	1	1	1	5	5	5	5	5	5	5
2	184	21	1	50	1.64	18.5901	2	2	1	3	1	1	3	6	1	2	9	2	3	1	5	5	7	3	8	2	1	1	7	1	7	5	7
2	186	19	0	70	1.78	22.0932	2	1	1	3	1	7	8	5	5	9	5	8	5	5	5	5	7	5	7	9	5	5	5	5	3	5	5
2	187	22	1	46.7	1.51	20.4816	2	2	1	2	1	4	4	5	5	4	5	4	4	4	5	5	5	4	5	4	4	4	5	5	5	4	5
2	188	22	1	80	1.63	30.1103	4	1	1	3	1	6	4	3	6	9	1	9	4	9	4	1	1	3	1	9	9	9	1	6	1	6	1
2	190	21	0	82	1.77	26.1738	3	2	1	2	1	8	8	5	8	9	7	7	5	5	5	7	6	8	7	3	5	5	5	6	6	6	8
2	192	20	0	73	1.72	24.6755	2	2	1	1	1	4	6	8	4	7	8	3	7	3	4	8	8	7	8	4	4	3	7	7	8	5	8
2	196	22	1	52	1.6	20.3125	2	1	1	3	1	6	5	5	5	9	5	8	2	9	2	5	5	9	5	9	5	9	5	5	5	9	5
2	198	24	1	52	1.64	19.3337	2	1	0	2	0	5	4	5	5	5	6	5	3	5	3	5	5	5	5	1	5	5	5	3	6	5	5
2	215	20	1	68	1.7	23.5294	2	3	0	2	1	7	5	5	3	9	2	5	5	9	1	2	5	3	5	1	1	1	1	1	1	5	7
2	218	23	1	53	1.72	17.9151	1	3	1	3	1	8	6	5	6	9	5	8	5	9	5	5	5	8	5	2	1	2	5	9	5	5	5
2	219	19	1	49	1.57	19.8791	2	2	1	2	1	1	1	6	1	1	6	2	5	1	2	5	5	2	6	6	1	1	5	1	5	5	5
2	220	20	1	60	1.65	22.0386	2	1	1	1	1	6	3	6	3	1	5	3	3	3	6	5	6	9	5	6	2	5	2	5	6	6	6
2	224	20	1	72	1.65	26.4463	3	2	1	3	1	3	3	5	5	7	5	6	2	7	5	8	5	1	5	7	6	1	1	5	5	5	7
2	225	24	1	63.7	1.58	25.5167	3		1	3	1	9	9	5	1	3	5	9	3	9	2	5	5	1	4	1	5	2	9	1	5	3	5
2	226	19	1	49	1.63	18.4425	1	2	1	1	1	2	3	6	4	1	6	3	1	1	5	6	5	4	6	2	2	3	5	5	6	4	6
2	229	18	1	85	1.76	27.4406	3	2	1	3	1	8	5	6	3	9	5	8	4	1	3	6	6	1	5	6	1	4	9	1	3	1	7
2	230	20	1	64.8	1.72	21.9037	2	1	1	2	1	4	5	5	5	9	5	7	5	1	5	5	5	5	5	3	5	5	5	7	4	5	5
2	231	21	1	57	1.61	21.9899	2	2	0	2	1	6	8	2	2	6	3	2	1	6	1	5	5	6	2	1	3	5	6	6	5	5	6
2	236	23	1	61	1.57	24.7475	2	1	1	3	1	6	7	5	7	9	5	6	5	4	5	5	5	6	5	5	6	2	6	5	5	4	5
2	238	23	1	41	1.52	17.7458	1	2	1	3	1	4	8	6	6	9	8	8	4	2	2	8	8	2	8	9	9	9	4	4	8	4	8
2	241	21	1	61	1.58	24.4352	2	1	1	3	1	8	8	4	5	9	5	9	3	7	1	5	5	5	5	7	1	1	6	1	5	1	5
2	244	19	1	50	1.52	21.6413	2	1	1	1	1	3	3	5	4	2	5	4	4	3	5	5	5	5	5	4	3	5	5	4	5	4	5
2	247	19	1	91	1.69	31.8616	4	2	1	3	1	5	5	5	5	8	5	8	3	3	5	5	5	7	5	3	3	2	5	5	6	5	5
2	248	23	1	52	1.55	21.6441	2	3	0	2	1	2	7	5	4	7	5	6	4	7	4	5	6	6	5	4	4	5	5	1	5	4	5
2	250	22	0	85	1.83	25.3815	3	1	0	2	1	3	5	5	5	6	7	4	5	3	5	7	6	7	6	5	5	4	5	5	6	5	6
2	253	23	0	70	1.83	20.9024	2	3	1	3	1	6	4	5	5	7	5	3	5	6	4	5	6	5	6	3	6	5	5	4	4	5	5
2	255	20	1	76.4	1.7	26.436	3	2	1	3	1	8	5	5	6	9	5	8	8	9	6	5	5	7	5	4	3	9	5	7	5	5	5
2	256	23	1	75	1.7	25.9516	3	1	1	3	1	9	5	5	5	9	6	9	6	9	5	5	5	7	5	4	5	5	5	5	6	5	5
2	265	20	1	47.5	1.55	19.7711	2	1	1	3	1	8	7	8	7	9	8	5	5	8	5	5	5	9	6	8	3	3	5	3	7	5	5
2	268	22	1	59	1.68	20.9042	2	2	1	2	1	7	5	5	6	6	5	5	5	4	4	6	5	5	5	4	5	4	4	8	7	5	6
2	270	23	1	55	1.58	22.0317	2	1	1	3	1	2	2	3	1	2	6	1	7	4	1	7	7	7	6	2	3	1	7	1	5	2	6
2	271	19	1	65	1.61	25.0762	3	3	1	1	1	9	9	5	5	9	5	5	5	7	5	5	5	6	5	3	5	5	5	6	5	5	5
2	274	24	1	74	1.56	30.4076	4	1	1	3	1	9	9	9	9	9	9	9	9	9	9	9	9	9	9	9	9	9	9	9	9	9	9
2	275	24	1	53	1.6	20.7031	2	2	1	3	1	5	5	5	5	7	5	6	4	5	5	5	5	7	5	6	5	7	5	5	5	5	5
2	276	23	1	55	1.6	21.4844	2	2	1	3	1	9	5	7	5	9	9	5	1	9	5	5	9	6	6	3	1	1	5	1	5	5	9
2	278	23	1	69	1.65	25.3444	3	2	1	3	1	6	5	5	7	8	6	5	3	2	2	5	5	5	5	2	4	2	5	5	6	5	6
2	279	22	0	64	1.76	20.6612	2	1	1	1	1	2	2	7	2	2	5	3	3	2	5	5	5	5	5	4	3	1	4	2	5	2	5
2	281	20	1	53	1.56	21.7784	2	3	1	3	1	9	8	5	7	9	5	7	8	9	9	4	4	9	4	4	1	1	7	1	7	1	5
2	282	23	1	51	1.58	20.4294	2	1	1	3	1	3	3	5	6	8	5	6	5	2	2	5	5	4	5	6	2	1	6	1	5	5	6
2	287	20	1	60	1.62	22.8624	2	1	1	3	1	9	9	4	7	9	4	9	7	7	6	7	6	9	6	9	9	7	8	9	1	7	4
2	288	19	1	60	1.58	24.0346	2	2	1	3	1	7	5	5	5	9	5	5	6	7	5	5	5	8	5	6	4	5	4	5	5	6	5
2	290	24	0	72	1.74	23.7812	2	2	1	1	1	5	5	5	5	6	5	5	5	5	5	5	5	5	5	4	5	5	5	5	5	5	5
2	291	19	1	63	1.6	24.6094	2	3	0	3	1	4	5	5	5	2	5	5	5	6	5	5	5	4	5	5	5	4	3	5	5	5	5
2	292	19	1	53	1.7	18.3391	1		1	3	1	6	5	5	5	1	5	7	7	6	3	5	5	6	5	3	1	1	4	1	5	2	5
2	294	21	1	120	1.65	44.0771	4	1	0	2	0	5	5	5	5	5	9	3	5	5	1	5	8	5	8	1	1	2	5	5	8	5	8
2	295	23	1	54	1.67	19.3625	2	2	1	3	1	1	3	5	5	5	7	3	3	1	1	7	5	5	5	1	1	1	3	5	7	1	7
2	297	23	1	59	1.57	23.9361	2	1	1	3	1	3	4	4	5	8	6	4	3	2	5	8	7	8	7	6	1	1	3	1	6	6	6
2	298	21	1	51	1.65	18.7328	2	1	1	3	1	8	8	3	5	9	4	9	8	8	5	5	4	8	5	3	3	3	3	5	3	4	4
2	300	19	1	54	1.57	21.9076	2	1	1	3	1	4	4	6	4	7	6	5	3	3	3	6	6	5	6	3	3	2	3	3	4	4	6
2	303	19	1	51	1.63	19.1953	2	3	1	3	1	7	5	6	6	8	5	4	4	4	5	6	5	6	5	7	4	4	5	5	6	5	5
2	304	19	1	53	1.57	21.5019	2	1	1	1	1	5	5	5	7	9	5	6	9	6	9	3	5	8	4	9	9	1	9	9	5	1	6
2	306	20	1	48	1.59	18.9866	2	2	1	3	1	6	5	7	5	7	5	4	4	4	5	5	5	7	5	3	3	3	6	3	5	4	6
2	308	19	1	74	1.72	25.0135	3	3	1	3	1	5	5	5	5	2	5	5	6	5	4	6	5	5	5	3	3	2	4	2	5	4	6
2	309	21	1	84	1.71	28.7268	3	1	1	1	1	1	1	7	1	9	7	3	2	1	1	5	7	3	6	7	3	1	7	1	7	1	9
2	310	21	1	50	1.63	18.8189	2	1	0	2	1	4	4	6	4	7	7	4	4	4	4	7	7	5	6	8	4	4	8	4	6	5	6
2	312	19	1	61				3	1	2	1	5	5	5	5	6	5	5	5	5	5	5	5	5	5	6	5	5	5	5	5	5	5
2	313	24	1	49	1.65	17.9982	1	3	1	2	1	1	1	5	7	1	1	9	1	1	1	5	9	5	1	9	1	1	1	1	9	1	5
2	314	21	1	85	1.7	29.4118	3	2	1	3	1	6	7	5	3	9	7	9	6	7	7	5	5	6	5	9	7	8	6	6	5	7	7
2	315	21	1	63	1.75	20.5714	2	3	0	2	1	8	8	5	9	9	5	7	7	8	3	4	3	6	5	7	9	7	5	7	3	7	4
2	317	22	0	58	1.76	18.7242	2	3	0	2	1	5	5	5	5	5	5	5	5	5	5	5	5	5	5	5	5	5	5	5	5	5	5
2	319	23	1	63	1.55	26.2227	3	2	1	2	1	6	5	5	7	8	8	6	7	8	3	5	5	4	5	5	3	5	4	7	4	7	5
2	321	19	1	73	1.62	27.8159	3	2	1	3	1	5	5	5	5	7	6	7	5	6	5	7	5	7	6	6	5	4	5	6	6	6	5
2	322	19	1	44	1.5	19.5556	2	1	1	2	1	3	1	6	2	7	8	3	6	4	1	2	7	5	8	1	3	3	8	2	5	5	7
2	323	20	0	70	1.65	25.7117	3	2	1	3	1	3	4	8	5	9	9	5	5	5	3	8	9	3	9	8	2	1	8	2	9	3	8
2	324	19	1	52	1.52	22.5069	2	3	1	2	1	7	7	5	5	6	5	5	3	3	5	5	5	4	7	7	3	2	5	5	5	3	5
2	325	24	1	61	1.68	21.6128	2	3	1	1	1	9	9	3	9	7	2	1	5	9	1	6	5	2	5	1	1	1	5	2	5	1	9
2	326	24	1	65	1.69	22.7583	2	3	1	1	1	9	5	7	5	9	7	9	1	9	5	5	5	7	5	5	5	5	3	7	3	5	6
2	327	18	0	81	1.9	22.4377	2	2	1	2	1	6	3	5	4	8	5	3	6	3	8	7	5	5	6	1	3	5	5	2	6	4	5
2	328	23	0	61	1.69	21.3578	2	3	1	1	1	2	4	5	5	6	6	5	2	1	3	4	6	4	5	7	3	3	5	2	5	4	6
2	329	21	1	62	1.62	23.6244	2	3	1	3	1	9	9	5	5	9	7	9	5	9	1	5	5	7	6	9	1	1	7	1	4	1	5
2	330	22	1	75	1.64	27.8852	3	1	1	3	1	1	9	4	3	9	5	9	7	1	6	4	3	8	2	1	1	1	6	1	5	4	6
2	333	20	1	54	1.65	19.8347	2	2	1	1	1	1	4	5	4	2	6	4	6	4	5	6	5	7	5	4	1	3	5	3	6	4	6
2	335	22	0	69	1.75	22.5306	2	2	1	3	1	8	3	5	7	8	5	3	7	8	2	5	5	4	5	3	3	7	5	7	5	3	5
2	336	23	1	47	1.52	20.3428	2	3	1	2	1	1	2	5	3	4	6	5	4	1	2	6	8	6	7	2	1	1	5	1	6	4	7
2	337	24	1	65	1.67	23.3067	2	3	1	1	1	1	1	5	1	7	9	1	1	1	5	5	5	9	9	1	1	1	9	1	9	1	9
2	338	21	0	67	1.77	21.3859	2	1	1	3	1	7	7	5	4	9	7	4	3	8	1	5	5	3	5	2	1	1	8	1	5	2	5
2	339	20	1	73	1.6	28.5156	3	2	0	3	1	8	9	7	9	9	9	9	7	9	3	5	4	7	5	7	3	8	3	5	2	8	7
2	341	20	1	46	1.71	15.7313	1	2	1	1	1	4	3	5	5	4	5	5	6	2	5	7	5	7	5	6	4	1	5	5	4	5	5
2	342	21	1	80	1.73	26.7299	3	3	1	1	1	7	6	1	4	9	5	8	1	9	3	5	5	1	6	1	1	1	4	5	7	4	8
2	345	23	1	62	1.54	26.1427	3	1	0	2	1	9	9	5	9	9	5	9	9	9	5	5	5	5	5	5	5	5	5	9	5	9	5
2	346	20	0	81.3	1.85	23.7546	2	3	1	3	1	3	5	5	3	8	5	2	4	4	5	5	6	5	5	2	5	5	6	3	5	2	5
2	347	18	1	68.5	1.57	27.7902	3	3	1	3	1	3	5	5	7	7	6	2	5	3	5	5	7	4	5	8	4	1	6	5	7	5	7
2	348	18	1	53	1.59	20.9644	2	3	1	3	1	7	5	5	6	7	5	6	4	6	5	5	5	4	5	5	5	5	5	5	5	5	5
2	349	20	0	105	1.75	34.2857	4	2	1	3	1	5	5	5	5	9	5	5	5	5	5	7	5	7	5	5	5	5	5	5	6	5	6
2	350	20	1	51	1.63	19.1953	2	2	1	3	1	3	3	5	5	2	5	4	5	1	3	5	5	5	5	2	5	3	5	5	5	5	5
2	351	21	1	60	1.7	20.7612	2	2	1	3	1	6	6	5	5	4	5	4	4	4	4	5	5	4	5	4	3	4	6	3	5	5	6
2	352	18	0	78	1.81	23.8088	2	2	0	2	0	4	5	5	5	3	7	5	5	5	5	8	6	5	5	5	5	1	6	4	5	5	6
2	353	21	1	54	1.61	20.8325	2	2	1	3	1	8	8	5	4	8	5	8	5	8	3	5	5	5	5	3	8	4	2	8	5	4	6
2	354	24	1	55	1.57	22.3133	2	2	1	3	1	3	3	5	5	3	6	5	4	6	3	7	7	5	5	1	2	1	6	2	7	5	7
2	355	19	1	53	1.63	19.9481	2	1	1	3	1	7	7	5	7	9	5	7	4	5	4	7	9	6	7	4	4	4	6	5	7	4	5
2	356	18	1	53	1.55	22.0604	2	2	1	3	1	8	4	5	5	9	5	6	6	8	2	5	5	6	5	2	2	1	7	1	5	4	7
2	357	22	1	53	1.58	21.2306	2	1	1	3	1	1	1	5	1	9	6	9	1	1	1	5	5	3	5	1	1	1	5	5	6	3	7
2	359	20	0	79	1.82	23.8498	2	2	0	2	1	6	5	5	5	8	5	5	1	5	5	6	5	7	5	1	5	5	5	5	3	5	5
2	360	19	1	48	1.66	17.4191	1	2	1	3	1	7	7	5	5	7	5	6	7	7	3	5	5	8	7	4	9	4	9	5	6	5	5
2	361	20	1	64	1.69	22.4082	2	2	1	1	1	2	2	7	7	9	7	7	7	1	1	5	5	3	5	9	3	1	5	3	5	5	5
2	362	24	0	63	1.82	19.0194	2	2	1	1	1	6	1	6	3	1	7	5	3	1	3	9	9	9	7	1	1	1	8	3	9	1	9
2	363	21	1	53	1.52	22.9398	2	2	1	3	1	5	6	5	7	7	6	7	5	3	4	5	5	6	7	5	4	1	7	1	6	6	6
2	370	23	1	37	1.51	16.2274	1	1	1	1	1	1	1	5	1	1	5	1	2	1	2	5	5	1	5	1	1	1	5	1	5	1	5
2	372	20	0	94	1.76	30.3461	4	2	1	2	1	6	7	5	6	6	5	5	5	5	5	6	5	5	5	5	5	5	6	5	5	5	6
2	381	19	1	61	1.63	22.9591	2	2	0	2	0	5	5	5	5	5	5	5	5	5	5	5	5	5	5	5	5	5	5	5	5	5	5
2	382	20	1	63	1.65	23.1405	2	3	1	3	1	6	4	3	5	9	8	9	9	9	3	4	3	4	4	8	2	5	5	1	1	9	3
2	384	23	1	70	1.69	24.5089	2	2	1	3	1	5	7	4	7	9	5	9	6	5	5	5	5	7	5	9	5	4	4	5	4	5	5
2	385	21	0	63	1.68	22.3214	2	2	0	2	1	5	5	5	5	3	5	5	7	5	5	5	5	5	5	5	5	5	5	5	5	5	5
2	387	20	1	63	1.65	23.1405	2	3	1	3	1	6	4	3	5	9	8	9	9	9	3	4	3	4	4	8	2	5	5	1	1	9	3
2	388	20	1	52	1.7	17.9931	1	2	1	3	1	9	8	5	8	9	5	9	6	9	4	6	5	9	4	4	3	3	4	7	5	6	5
2	389	20	1	50	1.62	19.052	2	3	1	2	1	5	6	5	5	6	5	6	6	5	5	5	5	4	5	6	4	5	5	5	4	5	5
2	390	19		54	1.61	20.8325	2	3	1	3	1	1	1	5	7	7	6	7	9	6	8	7	6	9	4	1	7	1	7	3	4	4	5
2	391	20	1	42	1.62	16.0037	1	3	0	3	1	2	6	5	6	1	7	2	5	2	2	7	8	1	7	2	2	1	5	5	4	1	5
2	400	23	0	68	1.78	21.4619	2	3	1	2	1	6	6	5	4	6	7	4	2	1	5	6	5	7	7	1	1	1	5	5	3	5	5
2	404	21	1	68	1.67	24.3824	2	3	1	1	1	1	4	5	6	1	6	5	5	1	2	5	5	1	5	3	1	1	5	2	5	5	7
2	407	21	0	68	1.76	21.9525	2	3	0	2	1	3	5	7	4	2	6	4	5	4	1	7	5	5	5	1	2	5	5	3	5	3	5
2	409	20	1	50	1.63	18.8189	2	3	1	1	0	3	5	5	5	3	5	5	5	2	4	6	6	4	6	4	5	1	5	5	5	3	5
2	412	22	1	58	1.8	17.9012	1	3	0	2	1	5	5	5	5	5	5	7	5	5	5	5	5	5	5	3	5	5	5	5	5	5	5
2	413	20	1	63.5	1.78	20.0417	2	2	1	3	1	3	5	5	4	9	5	5	4	2	5	5	5	7	5	3	3	1	5	9	2	5	5
2	416	19	1	43.7	1.58	17.5052	1	3	1	2	1	5	6	5	6	6	5	6	7	5	5	6	5	6	5	5	5	5	5	5	5	5	5
2	419	21	1	68	1.63	25.5937	3	1	1	3	1	7	7	5	7	9	5	9	6	9	1	5	5	5	5	9	7	5	5	5	5	6	5
2	420	20	0	52	1.68	18.424	1	2	1	1	1	3	5	5	5	4	5	3	5	1	5	5	5	5	5	6	5	6	5	6	5	3	5
2	423	23	0	105	1.8	32.4074	4	2	1	3	1	8	8	5	6	9	7	6	5	8	5	5	5	5	5	7	5	5	7	5	5	5	5
2	424	23	0	73	1.8	22.5309	2	3	1	3	1	6	7	4	5	7	5	7	7	7	5	5	5	5	5	6	3	5	4	5	4	5	5
2	425	19	0	67	1.66	24.3141	2	3	1	3	1	3	5	5	3	6	7	6	4	5	5	6	5	3	5	2	5	5	5	5	3	5	6
2	426	21	0	78	1.79	24.3438	2	2	1	1	1	7	6	5	6	7	5	5	4	6	5	5	5	6	5	6	5	5	5	6	5	4	5
2	428	23	1	70	1.54	29.5159	3	2	1	2	1	6	5	5	5	4	6	5	5	5	5	5	5	5	5	4	5	5	5	5	6	5	6
2	430	22	0	72	1.75	23.5102	2	3	1	2	0	1	1	9	1	1	9	1	1	1	5	9	9	5	9	1	5	1	9	1	9	1	9
2	431	19	1	50	1.73	16.7062	1	2	1	3	1	9	6	5	5	9	5	9	9	9	5	5	5	9	5	9	9	5	5	5	5	5	5
2	432	23	1	53	1.61	20.4467	2	3	0	1	1	1	1	7	1	1	7	1	4	1	1	7	5	1	7	3	1	1	5	5	7	1	7
2	438	24	0	109	1.88	30.8397	4	2	1	3	1	3	3	5	5	9	6	2	2	2	5	7	6	2	6	7	3	1	3	5	5	2	7
2	439	24	1	53	1.58	21.2306	2	3	1	3	1	6	5	5	5	7	5	7	5	7	5	5	5	4	5	5	5	5	5	5	4	5	5
2	441	19		48	1.58	19.2277	2	2	1	3	1	8	6	5	3	8	5	7	5	3	5	5	6	5	3	3	3	2	4	5	4	5	6
2	443	20	0	93	1.77	29.685	3	2	1	3	1	5	6	3	6	7	3	5	4	6	2	7	3	5	5	6	2	4	3	5	2	4	4
2	445	24	1	52	1.6	20.3125	2	1	1	3	1	1	9	5	1	9	5	6	3	1	5	7	6	5	5	3	4	1	5	1	5	3	5
2	446	22		113	1.78	35.6647	4	2	1	3	1	7	8	8	2	9	7	1	5	3	1	5	5	4	7	3	2	1	5	2	6	1	8
2	447	19	0	60	1.75	19.5918	2	2	1	1	1	4	5	5	5	5	6	5	3	4	5	5	5	6	5	5	5	5	5	5	5	5	5
2	448	21	0	51	1.74	16.845	1	2	1	2	1	4	7	6	3	8	5	5	4	4	2	6	7	3	5	7	4	5	4	5	7	5	5
2	449	19	1	55	1.63	20.7008	2	3	1	1	1	4	4	6	6	7	6	6	6	4	4	4	5	3	7	7	5	3	3	5	4	6	6
2	450	20	0	56	1.68	19.8413	2	2	0	3	1	3	2	7	5	1	7	5	4	5	4	7	5	7	5	3	5	5	7	5	6	5	5
2	451	19	0	68	1.73	22.7204	2	3	1	3	1	6	6	5	5	5	5	5	7	5	5	7	5	6	6	5	5	5	5	4	6	5	5
2	452	19	0	63	1.85	18.4076	1	1	0	3	1	5	6	4	2	8	4	2	1	1	6	7	3	9	5	7	5	5	6	5	1	5	5
2	453	21	0	69	1.69	24.1588	2	3	1	3	1	8	7	5	5	9	3	7	4	8	3	3	5	5	5	7	8	5	4	9	1	9	4
2	454	21	1	51	1.62	19.433	2	2	1	1	1	2	5	6	5	3	6	4	5	1	4	5	6	5	5	5	3	2	5	2	5	4	5
2	455	24	0	106	1.85	30.9715	4	1	1	3	1	5	5	6	5	8	7	5	7	5	5	6	7	5	5	5	5	2	7	1	5	5	6
2	456	24	1	46	1.52	19.91	2	2	1	1	1	1	3	5	3	1	6	5	5	1	3	7	5	5	7	4	3	1	5	1	6	5	6
2	460	20	1	70	1.61	27.0051	3	2	1	1	1	4	4	5	2	1	7	2	4	2	5	5	5	6	5	6	1	1	6	2	7	3	6
2	461	22	0	75	1.74	24.7721	2	2	1	1	1	5	6	4	3	7	5	6	2	2	2	4	5	4	5	3	2	3	5	3	4	3	6
2	462	22	0	67	1.7	23.1834	2	1	0	2	0	5	5	6	5	5	8	5	4	5	5	9	6	5	7	5	5	5	9	4	8	5	6
2	463	19	1	69	1.73	23.0546	2	1	1	3	1	5	5	5	5	9	5	9	5	7	7	5	5	7	5	9	5	7	5	5	1	6	5
2	466	20	1	95	1.63	35.756	4	1	1	3	1	7	7	5	8	9	5	8	2	7	2	5	5	2	5	9	4	5	5	5	5	5	5
2	467	20	1	70	1.61	27.0051	3	2	1	1	1	4	4	5	2	1	7	2	4	2	5	5	5	6	5	6	1	1	6	2	7	3	6
2	468	23	0	76.1	1.8	23.4877	2	1	1	2	1	7	5	5	7	9	6	3	4	2	5	5	6	5	5	5	5	6	8	5	5	3	6
2	470	24	1	57	1.57	23.1247	2	2	1	2	1	5	5	5	5	5	5	6	6	5	5	6	5	5	5	5	5	5	5	5	5	5	5
2	472	18	1	41	1.59	16.2177	1	1	1	1	1	1	1	3	6	1	6	5	1	1	6	7	6	6	6	1	7	2	7	1	4	1	7
2	473	20	0	88	1.8	27.1605	3	3	1	2	1	3	4	7	2	5	7	3	5	2	2	5	7	5	6	2	2	2	2	2	2	2	7
2	474	22	1	50	1.62	19.052	2	2	1	1	1	2	5	5	7	8	6	6	3	3	5	5	5	4	5	7	2	1	7	1	5	7	7
2	480	20	1	71	1.7	24.5675	2	3	1	1	1	7	3	1	5	9	6	7	5	7	9	3	5	8	4	9	7	9	6	9	5	7	4
2	483	19	1	65	1.53	27.7671	3	1	1	3	1	5	5	5	6	7	8	8	9	9	5	7	5	1	5	5	5	3	5	5	7	5	5
2	485	24	0	100	1.74	33.0295	4	2	1	1	1	4	7	6	5	7	7	3	5	4	7	5	7	3	5	7	5	7	5	5	4	3	5
2	486	19	1	88	1.59	34.8087	4	2	0	3	1	7	7	5	4	9	6	7	6	8	5	7	5	9	6	5	4	4	6	5	7	5	6
2	487	20	1	54	1.54	22.7694	2	3	1	3	1	7	6	5	5	9	5	6	6	7	5	5	5	5	5	5	5	5	5	3	5	5	5
2	489	19	1	54	1.63	20.3244	2	2	1	2	1	6	6	5	5	9	5	6	4	6	5	7	5	6	5	3	5	4	5	6	1	5	5
2	490	23	1	55	1.64	20.4491	2	3	1	3	1	7	7	5	7	1	5	7	1	5	5	5	5	1	5	1	1	1	5	1	5	5	5
2	492	21	1	55	1.55	22.8928	2	1	1	1	1	9	9	6	1	9	9	9	1	1	5	5	5	6	7	5	1	1	5	5	6	9	7
2	493	22	1	80	1.6	31.25	4	1	1	1	1	6	3	5	5	8	5	6	3	3	3	5	5	3	5	7	5	3	5	6	5	3	5
2	495	24	1	55	1.59	21.7555	2	3	1	2	1	7	7	5	5	8	5	6	1	2	5	5	5	6	5	7	5	7	5	1	5	3	5
2	502	24	0	59	1.71	20.1771	2	2	0	1	1	3	5	7	5	9	8	5	7	1	5	7	5	8	9	9	1	1	9	1	7	1	9
2	504	24	1	62	1.67	22.231	2	3	1	3	0	5	5	5	5	7	5	6	5	4	5	5	5	6	5	4	3	4	6	5	5	5	7
2	505	24	1	54	1.58	21.6311	2	1	1	3	1	9	1	5	1	9	5	9	9	9	1	5	5	8	5	1	1	1	1	5	5	9	9
2	506	18	1	55	1.61	21.2183	2	1	1	3	1	3	6	5	4	7	6	3	6	2	1	6	7	6	5	6	3	3	5	5	4	3	6
2	510	21	1	56	1.62	21.3382	2	3	1	1	1	3	7	5	4	8	5	3	6	3	7	5	7	6	7	7	3	2	7	3	7	6	5
2	517	24	0	78	1.85	22.7904	2	1	1	3	1	5	3	5	5	4	6	6	4	6	5	5	5	6	6	3	3	2	5	5	6	3	5
2	519	24	0	53	1.54	22.3478	2	1	1	2	1	1	3	9	3	3	6	2	6	2	3	9	9	5	6	1	1	1	3	2	5	3	6
2	521	23	0	76	1.76	24.5351	2	2	1	3	1	7	4	6	6	1	7	3	4	2	1	7	5	4	6	1	3	1	6	3	6	3	7
2	524	21	1	53	1.63	19.9481	2	3	1	1	1	6	5	5	4	7	5	5	4	5	5	6	5	5	5	6	5	7	4	6	5	5	5
2	525	21	1	53	1.63	19.9481	2	3	1	1	1	6	5	5	4	7	5	5	4	5	5	6	5	5	5	6	5	7	4	6	5	5	5
2	540	22	0	100	1.75	32.6531	4	2	1	2	1	5	5	5	1	3	4	1	1	1	1	6	5	1	5	1	1	1	5	6	1	1	1
2	544	24	1	58	1.72	19.6052	2	2	1	2	1	1	4	5	6	9	5	3	1	1	5	5	6	5	6	1	6	1	5	1	7	2	6
2	545	24	1	50	1.7	17.301	1	3	1	3	1	3	6	6	7	8	8	4	6	5	5	7	7	8	8	2	2	2	2	1	6	5	5
2	549	24	0	55	1.65	20.202	2	3	1	3	1	9	7	5	5	9	5	9	1	1	1	5	5	5	5	1	1	1	5	3	7	1	7
2	550	23	0	80	1.87	22.8774	2	2	1	1	1	4	5	6	5	7	5	5	3	4	5	7	5	5	5	4	1	1	5	1	6	5	5
2	556	19	0	74	1.82	22.3403	2	2	0	2	1	7	6	5	3	7	7	5	3	3	2	8	8	3	5	3	2	2	6	5	5	3	5
2	557	23	0	80	1.87	22.8774	2	2	1	1	1	4	5	6	5	7	5	5	3	4	5	7	5	5	5	4	1	1	5	1	6	5	5
2	562	21	1	78	1.61	30.0914	4	1	1	3	1	6	5	5	5	9	5	6	5	5	5	5	5	8	5	8	5	1	1	5	1	4	5
2	566	23	1	51	1.57	20.6905	2	1	1	3	1	3	5	6	6	7	5	7	3	1	7	5	5	2	6	3	5	2	3	1	5	5	6
2	568	24	1	62	1.7	21.4533	2	1	1	2	1	2	3	6	2	5	5	3	5	3	5	7	5	5	5	5	2	7	2	2	7	7	5
2	571	21	0	87	1.83	25.9787	3	1	1	3	1	4	4	5	4	4	5	4	4	4	5	6	5	2	5	4	4	5	6	3	5	5	6
2	573	24	1	58	1.5	25.7778	3	1	1	3	1	3	5	5	5	8	6	4	4	3	5	6	5	4	5	4	5	4	6	5	5	5	5
2	576	24	1	64	1.62	24.3865	2	2	0	2	1	7	5	1	6	8	3	6	3	6	5	2	2	5	3	6	7	2	2	7	2	6	5
2	578	24	1	70	1.55	29.1363	3	1	1	3	1	5	6	1	1	9	7	1	1	1	1	7	7	2	7	1	7	1	1	1	5	2	5
2	583	24	1	58	1.64	21.5645	2	3	1	2	1	7	7	5	7	7	5	7	3	3	3	6	5	7	5	7	1	1	3	1	5	3	5
2	585	23	0	98	1.84	28.9461	3	2	1	3	1	3	5	5	7	2	5	5	4	2	5	7	5	4	5	5	4	4	6	4	5	5	5
2	588	22	1	48	1.69	16.8061	1	2	1	1	1	3	3	5	3	6	5	2	4	2	3	5	6	2	5	3	3	5	6	5	5	3	5
2	593	24	1	68	1.59	26.8977	3	2	1	2	1	5	5	2	5	9	6	2	4	7	3	7	5	8	5	3	3	5	8	8	5	5	7
2	594	24	1	49	1.58	19.6283	2	2	1	3	1	1	3	5	5	1	5	1	4	1	4	5	5	5	5	2	2	1	5	1	5	5	5
2	595	18	1	67	1.64	24.9108	2	2	1	3	1	7	3	5	8	8	5	2	1	1	5	5	6	2	7	2	1	4	5	5	6	2	5
2	596	20	0	68	1.81	20.7564	2	2	1	1	1	3	3	5	4	4	5	3	4	3	4	5	5	5	5	4	4	4	5	5	5	4	5
2	597	18	0	65	1.74	21.4692	2	1	0	2	0	5	5	5	5	7	5	5	3	5	5	5	5	5	5	2	5	5	5	5	5	5	5
2	599	22	1	80	1.8	24.6914	2	2	1	3	1	8	4	5	4	9	6	5	9	8	5	7	5	9	5	5	5	5	3	5	8	5	5
2	603	22	1	72	1.73	24.0569	2	1	1	2	1	1	7	1	1	7	3	9	5	1	6	6	5	3	3	8	7	2	5	6	1	6	5
2	604	23	1	50	1.55	20.8117	2	2	1	3	1	7	5	3	6	9	4	6	1	5	1	5	5	5	5	6	1	3	3	5	6	5	6
2	606	21	1	45	1.6	17.5781	1	2	1	3	0	3	5	5	4	2	6	5	4	2	5	7	5	4	5	3	5	5	5	5	7	5	5
2	607	22	1	50.8	1.58	20.3493	2	2	1	2	1	7	1	5	2	4	5	6	2	6	4	5	5	7	5	2	1	3	4	4	5	1	6
2	608	19	1	78	1.64	29.0006	3	2	1	1	1	3	3	2	7	3	6	8	5	4	3	5	5	3	6	8	2	2	5	3	5	5	5
2	609	21	1	53	1.67	19.0039	2	2	0	3	1	1	1	7	5	2	9	5	2	1	5	8	5	5	7	1	1	1	7	1	7	4	6
2	610	19	1	62	1.65	22.7732	2	2	1	3	1	8	7	3	5	9	6	6	4	7	5	6	5	8	5	5	7	7	5	5	3	6	6
2	611	22	1	56	1.62	21.3382	2	1	1	2	1	5	6	5	5	9	6	7	3	7	5	5	5	5	2	2	2	1	5	5	9	5	7
2	613	24	1	61.5	1.56	25.2712	3	1	1	3	1	8	8	8	8	8	5	6	5	8	4	5	5	8	5	4	4	4	5	8	6	8	5
2	616	20	1	52	1.65	19.1001	2	1	1	2	1	3	3	5	3	1	5	5	5	5	2	5	5	3	5	2	2	1	5	2	5	5	5
2	617	20	1	72	1.67	25.8166	3	1	1	3	1	9	3	5	7	9	7	9	3	9	5	5	7	9	5	9	9	9	5	9	5	9	7
2	618	21	1	70	1.75	22.8571	2	1	1	1	1	3	4	5	5	9	5	9	1	1	5	5	5	2	5	9	5	1	4	4	5	5	5
2	620	20	1	74	1.66	26.8544	3	3	1	3	1	8	8	5	6	9	5	6	5	8	9	5	5	7	5	7	7	5	5	9	5	5	5
2	621	21	0	78	1.79	24.3438	2	3	0	2	1	5	5	5	5	7	5	6	5	5	5	5	5	5	5	6	5	5	5	5	5	5	5
2	622	24	1	59	1.65	21.6713	2	1	1	3	1	2	2	5	4	4	7	5	5	2	5	7	7	3	7	3	2	2	7	4	5	5	5
2	623	22	1	55	1.65	20.202	2	3	1	2	1	7	6	5	5	8	7	6	5	8	5	5	5	7	5	7	5	5	6	3	7	3	7
2	625	22	1	75.6	1.68	26.7857	3	3	0	2	1	5	5	5	4	4	5	4	3	4	1	5	5	5	4	5	5	5	5	5	3	5	5
2	628	21	1	61	1.76	19.6927	2	3	1	2	1	5	5	5	5	5	6	5	5	5	5	7	6	5	7	5	5	5	7	5	7	5	7
2	629	23	1	55	1.67	19.721	2	2	1	2	1	2	4	5	6	7	5	6	5	5	5	6	5	7	6	7	5	3	6	5	3	5	5
2	631	20	1	53	1.62	20.1951	2	1	1	2	1	1	3	5	5	7	5	4	4	3	3	6	6	5	5	3	2	2	5	1	6	5	5
2	632	22	1	60	1.63	22.5827	2	2	1	3	1	7	7	4	2	6	6	2	2	6	1	5	3	7	3	8	3	3	1	6	7	6	7
2	634	22	1	79	1.52	34.1932	4	2	1	3	1	3	5	4	3	2	7	4	3	3	5	5	7	5	5	9	8	7	7	8	5	5	5
2	636	23	1	65	1.74	21.4692	2	2	1	3	1	3	5	7	5	9	7	3	4	3	7	5	7	4	6	1	5	1	5	3	4	3	5
2	637	22	0	67	1.8	20.679	2	3	0	3	1	3	1	5	1	1	6	1	5	1	5	6	5	5	6	1	1	1	5	5	6	1	7
2	638	18	1	53	1.73	17.7086	1	1	1	1	1	1	3	5	5	1	6	4	3	1	5	5	6	3	5	3	3	5	7	5	5	3	6
2	639	22	1	55	1.64	20.4491	2	3	1	3	1	4	5	4	5	9	5	6	4	1	3	5	5	3	6	3	5	3	7	3	6	5	5
2	640	22	1	62	1.62	23.6244	2	2	1	3	1	3	5	5	5	4	7	5	6	5	5	7	5	5	5	7	4	7	5	3	5	5	5
2	641	20	1	63	1.63	23.7118	2	2	1	3	1	3	7	5	4	5	7	5	4	2	4	7	5	5	7	4	2	2	5	5	4	3	6
2	643	23	1	58	1.67	20.7967	2	1	1	3	1	4	6	6	3	8	9	7	1	3	2	5	6	1	8	5	3	6	8	5	8	4	8
2	645	20	1	80	1.66	29.0318	3	1	1	3	1	1	1	5	1	9	5	1	1	1	1	7	5	5	5	1	1	1	5	1	5	3	5
2	646	22	0	71	1.75	23.1837	2	3	1	2	1	2	3	5	1	1	5	1	6	1	1	5	5	4	5	5	1	1	5	5	3	2	5
2	647	19	1	60	1.63	22.5827	2	3	1	2	1	9	9	5	7	9	5	6	6	6	5	5	5	6	5	9	5	5	5	6	5	5	5
2	648	20	1	47	1.63	17.6898	1	2	1	2	1	4	4	5	4	3	5	5	5	4	4	5	5	4	5	3	3	3	5	5	5	4	5
2	649	22	1	67	1.64	24.9108	2	3	1	3	1	6	7	5	5	8	4	6	5	6	5	5	5	4	5	5	5	6	5	5	3	5	5
2	650	24	1	60	1.61	23.1473	2	2	1	3	1	3	5	5	2	7	5	7	5	5	5	6	6	6	5	4	3	3	6	5	4	8	6
2	652	22	0	57	1.7	19.7232	2	3	1	1	1	1	5	7	4	3	6	4	5	1	5	5	5	5	6	4	3	5	4	1	5	5	6
2	653	24	0	84	1.85	24.5435	2	2	1	3	0	6	5	5	6	7	5	6	5	6	5	5	5	7	5	7	5	5	5	7	5	5	5
2	654	24	0	84	1.85	24.5435	2	2	1	3	0	6	5	5	6	7	5	6	5	6	5	5	5	7	5	7	5	5	5	7	5	5	5
2	658	20	0	49	1.65	17.9982	1	3	1	3	1	4	5	5	5	6	6	5	4	5	5	5	5	5	5	3	5	5	5	5	4	5	5
2	659	22	0	71	1.68	25.1559	3	3	1	1	1	8	8	5	3	7	5	5	3	3	5	5	5	7	5	4	3	3	5	4	5	5	5
2	661	24	1	53	1.6	20.7031	2	3	1	3	1	4	5	4	3	1	6	3	4	5	4	7	5	5	5	2	1	3	8	5	2	5	5
2	663	21	0	75	1.85	21.9138	2	2	0	2	1	7	7	5	9	9	5	3	5	4	1	5	5	5	6	1	9	6	5	5	8	1	5
2	666	21	0	79	1.87	22.5914	2	3	1	1	0	5	7	7	8	5	4	6	1	5	5	7	5	6	2	1	5	5	5	5	1	5	5
2	667	23	1	71	1.72	23.9995	2	2	1	1	1	9	8	5	5	9	5	1	9	7	5	6	5	9	5	4	5	4	5	3	3	4	5
2	668	22	0	70	1.76	22.5981	2	2	1	2	1	3	6	3	6	2	6	7	5	5	1	8	5	7	2	1	6	2	3	7	2	6	6
2	672	24	0	100	1.8	30.8642	4	3	1	2	1	5	7	5	1	5	7	2	1	5	1	8	5	2	9	1	3	2	5	5	1	7	7
2	673	18	1	70	1.57	28.3987	3	3	1	3	1	7	3	5	4	9	7	9	1	2	1	5	5	4	6	7	7	3	5	7	3	6	6
2	675	21	0	72	1.62	27.4348	3	1	1	1	1	9	7	4	5	8	9	7	5	9	1	6	5	2	6	1	1	5	5	1	7	1	7
2	676	18	1	68	1.64	25.2826	3	2	1	3	1	3	5	5	3	7	7	6	3	3	3	5	4	7	5	3	1	1	4	4	6	5	5
2	678	21	0	78	1.79	24.3438	2	3	0	2	1	5	5	5	5	7	5	6	5	5	5	5	5	5	5	6	5	5	5	5	5	5	5
2	680	22	1	61	1.7	21.1073	2	3	1	3	1	4	5	5	7	3	6	7	4	3	4	5	6	6	5	3	7	3	5	1	6	3	5
2	682	23	1	74	1.75	24.1633	2	3	1	2	1	3	8	5	7	4	5	7	3	4	5	5	5	5	5	3	4	2	2	3	5	7	5
2	685	18	1	57	1.66	20.6852	2	2	1	1	1	2	4	6	5	2	7	3	5	1	3	5	6	2	5	3	2	1	5	5	6	3	6
2	686	18	1	59	1.73	19.7133	2	1	1	3	1	9	6	5	3	1	7	9	9	9	2	5	5	8	5	2	5	5	5	7	3	8	8
2	687	22	1	53	1.64	19.7055	2	2	1	1	1	1	5	5	5	1	7	2	5	1	2	8	7	5	5	1	1	1	4	4	7	5	8
2	695	22	0	104	1.93	27.9202	3	3	1	2	1	5	6	5	4	7	6	8	3	4	5	5	5	6	5	4	4	5	5	5	6	5	7
2	696	18	1	42	1.53	17.9418	1	2	0	2	0	3	4	5	5	5	5	5	3	4	5	5	5	4	5	5	5	5	5	5	5	5	5
2	697	19	0	70	1.8	21.6049	2	3	1	3	1	1	7	9	5	9	7	4	2	1	5	5	8	4	9	8	3	1	4	1	7	2	8
2	698	20	0	55	1.76	17.7557	1	2	1	2	1	3	7	5	3	4	5	6	4	2	4	5	5	5	5	4	1	1	5	2	4	3	5
2	699	22	0	70	1.84	20.6758	2	2	1	2	1	5	6	5	7	8	5	8	5	7	5	5	5	4	6	8	8	5	5	5	5	5	5
2	700	20	0	51	1.7	17.6471	1	2	1	3	1	3	4	6	6	3	5	3	6	3	5	5	5	4	5	4	4	4	5	5	4	5	5
2	701	21	1	49	1.64	18.2183	1	1	1	1	1	3	3	5	3	3	6	3	2	6	2	6	6	5	5	2	1	2	6	3	5	1	6
2	702	22	0	63	1.66	22.8625	2	3	1	2	1	3	5	5	6	1	5	4	6	3	5	5	5	3	5	5	5	5	5	3	5	4	5
2	703	24	1	64	1.6	25	3	1	1	1	1	9	9	2	7	9	1	9	7	9	5	1	1	3	1	8	9	8	1	8	1	7	1
2	704	23	1	60	1.63	22.5827	2	2	1	3	1	4	6	5	6	7	5	4	4	3	3	5	5	3	5	6	4	2	5	6	5	6	6
2	709	20	0	64	1.7	22.1453	2	2	0	2	1	3	3	9	5	5	9	5	3	3	5	7	5	5	5	5	5	5	5	5	6	6	7
2	710	22	0	60	1.78	18.937	2	2	1	3	1	2	6	5	6	6	5	6	5	2	5	5	5	5	5	7	5	3	5	2	4	5	5
2	711	19	1	51	1.53	21.7865	2	3	1	3	1	6	5	5	4	7	6	8	6	6	5	5	6	7	5	7	5	5	4	5	5	5	6
2	712	24	1	58	1.67	20.7967	2	1	1	1	1	1	1	5	1	6	6	3	5	1	5	6	6	5	6	1	1	1	6	3	6	2	6
2	714	19	1	61	1.56	25.0657	3	3	1	3	1	3	3	5	8	9	6	3	3	2	5	5	5	3	5	4	2	2	4	2	7	3	7
2	715	21	1	55.2	1.61	21.2955	2	3	1	2	1	6	6	7	6	8	5	6	6	6	5	5	5	8	6	7	5	5	5	5	5	5	7
2	716	19	1	59	1.63	22.2063	2	2	1	3	1	1	1	2	1	2	2	1	2	1	1	2	2	3	2	2	1	1	3	2	1	1	2
2	717	20	1	59	1.75	19.2653	2	2	1	3	1	5	3	5	3	8	6	4	4	4	4	6	6	5	6	3	2	4	6	3	6	4	6
2	719	21	1	53	1.75	17.3061	1	3	0	2	1	1	1	5	5	1	5	5	5	5	5	5	5	5	5	5	5	1	5	5	5	5	5
2	720	22	1	60	1.6	23.4375	2	1	0	2	1	3	5	5	5	6	7	4	8	1	6	5	6	1	5	4	3	4	4	3	5	4	5
2	721	22	1	71	1.57	28.8044	3	2	1	3	1	8	5	4	3	9	7	6	2	7	2	4	5	8	5	8	5	5	5	5	1	3	5
2	722	20	1	63	1.61	24.3046	2	3	1	2	1	3	5	5	6	7	5	5	3	4	3	5	5	4	5	6	5	3	6	5	5	3	5
2	723	21	0	83	1.76	26.7949	3	3	1	1	1	4	5	7	5	6	7	6	6	4	3	6	5	6	6	3	5	4	5	4	5	3	5
2	724	19	0	75	1.75	24.4898	2	2	1	1	1	3	4	8	8	9	7	8	9	3	2	5	5	6	9	1	4	1	5	1	1	6	5
2	725	18	1	72	1.7	24.9135	2	2	1	3	1	7	9	5	5	9	5	9	5	9	5	5	5	5	7	8	1	3	3	3	5	4	7
2	727	24	1	65	1.83	19.4094	2	2	1	3	1	6	4	5	5	2	5	4	6	3	5	5	5	6	5	4	3	3	5	5	3	4	5
2	728	23	1	57	1.53	24.3496	2	3	1	3	1	3	7	6	9	9	7	9	7	7	5	7	5	1	5	4	8	3	5	9	4	4	6
2	729	22	0	70	1.76	22.5981	2	3	0	2	0	3	5	5	5	5	5	5	4	5	5	5	5	5	5	5	5	1	5	5	4	5	5
2	730	19	1	47	1.53	20.0777	2	2	1	1	1	2	5	5	6	7	6	5	3	3	6	5	5	6	4	6	7	7	6	4	5	4	6
2	731	18	0	73	1.82	22.0384	2	2	1	3	1	4	4	6	6	7	5	6	7	5	3	8	5	5	6	6	7	4	4	6	9	5	6
2	733	22	0	86	1.82	25.963	3	1	1	1	1	1	4	3	1	1	6	3	1	1	5	3	4	5	5	5	9	5	1	4	3	1	4
2	735	21	0	70	1.81	21.3669	2	3	1	3	1	3	7	5	5	8	6	4	1	3	5	5	5	2	5	5	3	5	5	2	7	4	5
2	738	24	1	100	1.66	36.2897	4	2	1	3	1	8	8	5	8	6	5	8	7	7	3	5	5	3	5	7	9	6	2	8	4	5	5
2	739	20	1	46	1.54	19.3962	2	1	0	3	1	1	5	7	3	1	9	3	5	3	1	5	7	3	6	2	1	1	5	1	5	3	7
2	741	20	1	62	1.7	21.4533	2	1	1	3	1	7	2	5	2	7	5	2	2	2	2	5	6	5	7	2	2	3	4	6	5	3	5
2	742	21	1	48	1.6	18.75	2	2	1	2	1	3	4	5	6	7	7	6	4	4	4	5	5	5	6	6	3	3	5	3	6	4	6
2	743	20	1	55	1.65	20.202	2	2	0	2	1	7	7	5	5	4	7	7	5	7	5	5	5	1	5	5	5	3	5	5	5	5	6
2	748	21	0	73	1.85	21.3294	2	1	1	2	1	2	3	5	6	9	6	6	4	2	5	5	5	6	5	8	3	3	5	3	5	5	5
2	751	24	0	72	1.75	23.5102	2	1	1	2	1	3	3	5	3	6	5	5	5	4	4	6	6	5	6	5	4	3	5	5	5	4	5
2	755	20	1	63	1.74	20.8086	2	1	1	3	1	3	3	5	3	8	5	6	3	2	5	5	5	7	5	3	2	2	5	5	4	7	6
2	756	19	0	80	1.77	25.5354	3	2	1	3	1	7	5	5	5	2	6	6	5	3	5	5	5	5	5	2	2	2	5	5	2	5	6
2	760	22	0	75	1.8	23.1481	2	3	1	3	1	9	3	5	5	9	7	6	4	2	2	6	6	8	6	7	5	5	5	3	6	3	5
2	761	20	0	115	1.73	38.4243	4	2	1	3	1	9	8	6	9	9	6	9	5	9	7	5	5	5	6	9	9	9	1	4	5	6	5
2	768	24	1	73	1.85	21.3294	2	1	1	3	1	3	4	6	5	6	6	6	1	2	1	6	6	5	6	4	5	8	6	1	6	4	9
2	777	24	1	70	1.77	22.3435	2	2	1	3	1	8	7	5	5	9	5	7	6	7	4	5	5	6	5	7	7	7	5	6	5	6	6
2	778	24	1	43	1.65	15.7943	1	1	1	1	1	5	5	5	2	1	8	5	4	6	1	7	5	5	8	2	1	2	5	5	6	4	8
2	779	22	1	90	1.8	27.7778	3	3	1	1	1	3	5	5	7	1	5	7	5	3	1	9	5	3	6	1	1	3	5	5	5	5	5
2	781	19	1	50	1.68	17.7154	1	3	1	1	1	6	3	5	3	1	5	3	5	6	5	5	5	4	5	2	2	2	6	5	6	5	5
2	789	19	1	58	1.67	20.7967	2	2	1	2	1	3	1	5	4	1	5	4	1	4	5	5	5	5	6	1	1	1	5	5	5	3	5
2	790	23	1	66	1.76	21.3068	2	3	0	2	0	5	5	5	5	5	5	5	5	5	5	5	5	5	5	4	3	4	5	5	4	4	5
2	791	20	1	50	1.54	21.0828	2	2	1	2	1	1	5	5	5	1	7	5	3	1	1	5	5	5	5	1	5	1	7	1	6	5	5
2	793	20	1	120	1.71	41.0383	4	2	1	3	1	9	7	6	5	8	7	8	3	9	5	5	5	7	6	5	6	3	2	7	1	5	7
2	794	20	1	48.5	1.56	19.9293	2	2	1	3	1	6	4	6	4	9	5	6	4	4	5	6	5	5	5	7	4	3	7	5	5	4	5
2	796	20	1	48	1.6	18.75	2	2	1	2	1	2	2	5	4	2	5	2	3	1	4	5	5	5	5	2	1	1	5	1	5	3	5
2	797	19	1	43	1.62	16.3847	1	2	1	3	1	9	9	5	3	9	6	5	5	9	3	5	5	5	5	1	1	1	5	9	5	1	5
2	799	22		80	1.6	31.25	4	3	1	2	1	7	2	5	2	8	5	4	5	9	5	5	5	5	5	7	2	1	5	5	5	5	5
2	803	19	1	60	1.61	23.1473	2	3	1	2	1	3	3	5	3	3	5	3	3	3	3	5	5	4	5	5	5	5	5	5	5	4	5
2	805	19	1	52	1.61	20.061	2	3	1	3	1	7	6	5	5	5	7	5	8	7	5	5	5	5	5	4	5	7	6	8	5	5	7
2	806	22	1	48	1.64	17.8465	1	3	1	1	1	1	4	5	6	6	5	7	4	1	5	5	7	3	5	7	4	5	5	1	4	5	5
2	807	22	1	77	1.58	30.8444	4	1	1	1	1	4	5	6	1	9	8	4	5	5	5	7	6	6	5	4	1	1	6	3	5	4	6
2	809	21	1	69	1.7	23.8754	2	2	1	2	1	7	7	1	5	9	1	7	8	8	1	5	1	1	1	5	1	1	1	1	1	7	6
2	810	22	1	52	1.58	20.83	2	2	1	3	1	1	3	5	3	2	5	1	7	1	5	7	5	3	5	1	2	1	8	3	5	2	5
2	811	19	0	56	1.78	17.6745	1	3	1	1	1	4	4	5	5	1	6	4	5	5	4	5	6	5	5	3	5	5	5	4	5	5	5
2	813	23	1	69	1.67	24.7409	2	2	1	1	1	3	4	6	6	3	6	7	5	2	7	6	7	5	6	5	7	2	7	2	3	5	5
2	814	22	1	85	1.67	30.478	4	1	1	3	1	7	9	5	6	9	5	9	7	8	5	5	5	7	5	8	6	3	4	2	3	5	5
2	815	19	1	58	1.6	22.6562	2	1	1	3	1	1	3	5	4	9	8	9	5	3	7	5	5	8	5	8	3	5	7	1	4	3	5
2	816	23	0	74	1.75	24.1633	2	2	1	2	0	1	1	6	1	1	7	1	2	1	1	8	5	2	5	1	1	1	1	1	7	1	5
2	819	21	1	53	1.5	23.5556	2	1	1	3	1	9	9	3	1	9	5	9	2	9	1	4	6	6	4	1	1	1	5	9	4	2	4
2	822	23	1	60	1.73	20.0474	2	2	1	2	1	7	7	3	4	8	5	7	3	3	6	5	3	5	4	7	3	4	4	5	3	5	6
2	823	20	1	58	1.7	20.0692	2	2	1	1	1	3	3	5	3	8	5	3	2	2	2	5	7	2	6	7	3	2	7	1	6	3	6
2	825	20	0	68	1.83	20.3052	2	1	1	1	0	4	5	5	4	6	6	5	5	5	5	5	6	4	6	4	4	3	5	5	6	5	5
2	826	19	1	68	1.54	28.6726	3	2	1	3	1	3	4	5	4	9	5	9	4	1	2	7	6	3	4	9	2	1	5	1	5	4	6
2	827	21	0	103	1.9	28.5319	3	3	0	3	1	2	3	7	4	1	5	6	7	4	1	8	6	5	6	3	3	1	6	1	7	3	7
2	828	22	1	53	1.71	18.1252	1	3	0	2	0	3	5	5	5	4	5	5	3	3	5	5	5	5	5	5	3	3	5	3	5	5	5
2	830	24	0	61	1.73	20.3816	2	1	1	1	1	5	5	4	5	4	7	5	6	5	5	8	5	4	5	5	5	8	5	5	4	3	5
2	831	22	0	60	1.73	20.0474	2	2	1	1	1	5	5	5	6	5	5	5	7	5	5	5	5	6	5	5	5	5	6	5	7	5	5
2	832	21	1	115	1.73	38.4243	4	3	1	3	1	7	5	5	7	8	5	7	5	3	1	5	5	6	5	3	3	3	2	2	1	6	5
2	833	21	1	58	1.62	22.1003	2	1	1	3	1	7	6	4	4	7	4	5	3	5	3	5	5	7	5	5	3	3	5	6	5	3	5
2	834	23	1	58	1.62	22.1003	2	1	1	3	1	9	5	5	5	7	5	7	5	7	5	3	5	5	5	3	7	7	2	5	2	5	5
2	835	20	1	60	1.6	23.4375	2	2	1	2	1	2	3	5	5	8	5	3	5	3	5	5	5	1	5	3	3	3	6	4	5	4	6
2	837	23	0	76	1.83	22.694	2	2	1	2	1	4	6	5	6	7	5	4	4	2	4	6	5	5	5	3	3	1	5	1	5	4	6
2	838	20	1	56	1.62	21.3382	2	2	1	3	1	7	6	5	5	9	5	7	5	3	5	5	5	6	5	7	7	8	7	3	7	7	5
2	839	19	0	61	1.63	22.9591	2	2	1	3	1	7	6	3	5	9	5	6	1	2	5	5	5	7	6	7	6	3	7	6	5	4	5
2	840	21	1	56	1.72	18.9292	2	1	0	3	1	5	5	5	5	5	5	5	3	5	5	6	5	6	5	4	4	3	5	5	5	5	5
2	841	20	1	65	1.66	23.5883	2	2	1	3	1	6	6	5	5	9	7	9	1	1	1	5	6	9	5	9	9	6	8	5	1	5	5
2	842	23	1	105	1.65	38.5675	4	2	1	3	1	7	6	5	5	8	6	7	6	7	5	5	5	6	5	5	5	5	7	8	5	6	5
2	843	22	1	62	1.6	24.2187	2	1	1	3	1	7	7	5	5	9	5	6	3	7	5	5	5	5	5	8	8	2	8	4	5	1	5
2	845	19	1	74	1.7	25.6055	3	1	1	3	1	7	4	2	3	7	1	6	2	5	5	5	5	1	4	8	4	3	3	6	3	5	5
2	847	24	0	79	1.96	20.5643	2	3	1	3	0	4	5	5	5	6	6	3	5	1	5	6	3	5	3	3	3	5	3	5	3	5	3
2	849	21	1	70	1.6	27.3437	3	2	1	3	1	9	9	5	9	9	6	9	8	9	7	4	5	9	6	9	9	9	5	5	5	9	6
2	850	21	1	55	1.6	21.4844	2	2	1	2	1	8	5	7	3	7	5	7	5	8	3	5	5	8	5	3	5	4	5	5	4	5	5
2	853	24	0	68	1.69	23.8087	2	3	1	2	1	6	6	5	6	8	5	7	4	4	3	5	5	5	7	3	2	2	5	4	5	4	6
2	854	24	1	62	1.57	25.1532	3	2	1	2	1	3	7	5	7	8	5	8	6	6	5	5	5	3	5	7	3	2	5	6	5	3	6
2	855	23	1	62	1.6	24.2187	2	1	0	2	1	5	5	5	4	5	5	5	5	5	5	5	5	4	5	5	3	3	5	5	5	5	5
2	860	24	0	64	1.74	21.1389	2	1	1	1	1	6	2	5	2	6	7	3	1	2	5	6	8	5	5	6	4	5	4	5	2	2	6
2	870	21	1	84	1.83	25.0829	3	2	1	3	1	7	6	5	5	7	6	8	6	5	5	5	5	6	5	5	6	5	7	6	5	5	6
2	874	22	0	62	1.8	19.1358	2		1	1	1	4	3	5	5	6	5	3	4	3	5	6	6	4	7	4	3	2	4	5	5	3	6
2	876	20	0	66	1.76	21.3068	2	2	1	3	1	7	5	5	7	5	5	7	5	7	5	5	5	5	5	5	5	5	5	7	5	7	5
2	878	24	0	67	1.75	21.8776	2	2	1	2	1	7	7	4	5	7	3	8	1	2	3	4	5	8	8	3	2	5	2	3	5	7	5
2	879	21	1	90	1.85	26.2966	3	3	1	3	1	8	8	1	5	9	6	5	4	8	2	5	6	6	5	1	5	4	4	5	5	5	5
2	881	23	1	46	1.55	19.1467	2	3	1	3	1	3	5	5	5	8	5	7	5	3	5	5	5	6	6	6	3	3	5	1	5	5	7
2	883	20	1	95	1.65	34.8944	4	1	1	2	1	4	3	6	6	6	5	4	3	2	5	5	5	4	5	6	6	4	6	4	5	4	6
2	890	19	1	43	1.57	17.4449	1	3	1	3	1	2	5	5	5	8	6	4	3	1	5	5	5	3	6	7	4	1	5	2	5	6	5
2	891	22	1	51	1.5	22.6667	2	2	0	2	1	7	6	4	7	7	6	7	6	6	5	6	4	8	6	4	7	7	7	7	4	6	5
2	892	20	1	59	1.69	20.6575	2	2	1	2	1	7	7	5	7	9	5	6	3	6	1	5	5	5	6	7	2	1	5	5	5	3	5
2	893	22	1	77	1.58	30.8444	4	2	1	2	1	7	5	5	5	8	7	5	3	4	5	5	5	4	5	3	5	5	5	4	5	6	6
2	894	21	1	53	1.55	22.0604	2	3	1	2	1	3	3	5	6	3	6	5	5	2	5	5	5	7	5	6	5	5	5	5	4	5	5
2	896	21	0	90	1.74	29.7265	3	3	1	2	1	7	3	5	5	7	7	3	5	5	3	5	7	7	5	5	5	5	7	3	5	5	7
2	899	24	1	80	1.7	27.6817	3	1	1	3	1	9	9	3	6	9	3	9	9	9	2	3	3	6	3	7	5	5	6	5	5	5	5
2	901	18	1	85	1.67	30.478	4	2	1	2	1	9	6	3	5	8	5	9	7	9	3	6	4	8	5	5	6	5	6	6	6	5	5
2	902	22	1	87	1.62	33.1504	4	2	1	3	1	1	1	5	1	1	9	5	5	5	5	9	5	3	7	9	9	9	3	8	4	8	5
2	904	20	1	83	1.62	31.6263	4	1	1	3	1	9	8	1	9	9	4	9	9	9	9	3	5	9	3	9	9	5	9	9	5	5	5
2	905	19	0	94	1.84	27.7647	3	3	0	2	1	4	3	3	3	6	6	7	3	3	3	5	5	3	5	5	3	2	5	5	5	5	6
2	907	22	1	48	1.54	20.2395	2	1	1	3	1	1	5	7	5	7	7	5	2	3	5	5	7	3	5	3	3	1	2	2	6	3	6
2	908	20	1	83	1.62	31.6263	4	1	1	3	1	9	8	1	9	9	4	9	9	9	9	3	5	9	3	9	9	5	9	9	5	5	5
2	909	22	1	53	1.68	18.7783	2	1	1	2	1	3	2	5	2	5	5	2	2	2	1	5	5	5	5	1	1	1	5	5	5	5	5
2	910	23	1	44	1.66	15.9675	1	3	0	2	1	5	5	5	5	5	5	5	5	5	5	5	5	5	5	5	3	1	5	5	5	5	5
2	912	23	1		1.7			2	1	2	1	5	5	5	5	6	5	5	3	5	5	5	5	3	5	3	2	1	5	1	3	5	2
2	913	23	1		1.7			2	1	2	1	5	5	5	5	6	5	5	3	5	5	5	5	3	5	3	2	1	5	1	3	5	2
2	915	22	0	100	1.76	32.2831	4	3	1	3	1	9	9	5	9	9	5	9	5	9	5	7	5	9	7	9	9	9	5	9	5	9	5
2	916	22	1	53	1.68	18.7783	2	1	1	2	1	3	2	5	2	5	5	2	2	2	1	5	5	5	5	1	1	1	5	5	5	5	5
2	918	21	1	81	1.72	27.3797	3	2	1	3	1	7	3	5	3	9	5	4	3	7	5	5	4	8	5	3	3	3	5	1	5	4	5
2	920	22	1	104	1.67	37.2907	4	3	1	3	1	5	3	4	3	8	2	4	1	8	1	5	5	5	5	9	9	1	1	1	1	9	1
2	921	20	1	68.9	1.64	25.6172	3	3	1	3	1	3	5	5	5	3	7	5	4	3	5	6	7	5	8	3	1	5	9	2	6	5	7
2	922	24	1	58	1.7	20.0692	2	2	0	2	0	5	5	5	5	5	5	5	5	3	5	3	5	5	5	5	5	3	5	4	5	5	5
2	924	21	1	72	1.6	28.125	3	2	1	3	1	9	6	5	8	9	5	9	2	7	2	6	4	9	4	2	2	1	6	9	2	8	6
2	926	21	1	75	1.73	25.0593	3	2	1	3	1	2	5	6	7	5	7	2	5	5	2	6	5	4	6	2	5	5	7	5	5	5	6
2	927	20	1	55	1.54	23.1911	2	1	1	3	1	1	3	6	2	1	8	2	5	1	1	5	5	3	6	4	3	1	9	2	5	4	6
2	930	21	1	90	1.6	35.1562	4	1	1	2	1	6	6	6	6	7	6	7	6	7	6	6	6	7	6	7	4	4	5	5	4	5	6
2	931	24	1	63	1.65	23.1405	2	3	1	3	1	5	3	3	5	6	5	6	1	1	1	5	5	7	5	7	1	1	5	7	5	5	5
2	932	22	1	54.7	1.61	21.1026	2	2	1	3	1	7	7	5	7	7	7	7	3	3	3	5	5	7	7	3	2	2	5	6	7	5	7
2	933	21	1	76	1.67	27.2509	3	3	1	1	1	3	4	5	3	7	5	3	3	1	3	5	6	7	5	4	3	2	4	5	7	4	5
2	934	22	0	70	1.74	23.1206	2	3	0	2	0	5	5	6	5	3	6	5	5	5	4	7	5	5	6	4	5	5	6	5	6	5	5
2	935	22	1	60	1.57	24.3418	2	2	1	3	1	4	4	4	4	8	4	8	8	6	2	6	4	8	4	2	2	1	1	2	6	1	5
2	936	20	1	65	1.61	25.0762	3	2	0	2	0	1	1	5	1	5	5	1	5	4	5	5	7	1	5	5	1	1	5	5	5	5	5
2	940	21	1	49	1.6	19.1406	2	2	0	2	1	6	4	5	4	6	5	3	4	6	5	5	5	4	5	4	4	5	5	7	5	6	5
2	943	21	1	75	1.73	25.0593	3	2	1	3	1	2	5	6	7	5	7	2	5	5	2	6	5	4	6	2	5	5	7	5	5	5	6
2	945	21	1	62	1.7	21.4533	2	1	1	3	1	5	5	7	5	7	8	6	6	7	5	5	6	5	7	2	2	2	5	3	7	5	8
2	946	21	0					2	0	3	1	2	5	6	2	7	6	3	6	2	6	4	6	3	8	2	5	3	6	3	2	2	5
2	950	22	1	104	1.67	37.2907	4	3	1	3	1	5	3	4	3	8	2	4	1	8	1	5	5	5	5	9	9	1	1	1	1	9	1
2	962	21	1	91	1.7	31.4879	4	1	1	3	1	1	1	5	7	9	6	9	4	9	1	5	5	9	7	9	9	1	4	1	5	1	6
2	963	21	1	105	1.75	34.2857	4	1	1	2	1	9	9	5	6	9	1	7	8	9	8	1	3	9	1	6	2	1	3	1	5	3	5
2	965	24	1	48	1.67	17.2111	1	2	0	2	1	3	3	5	3	3	5	5	5	3	2	5	5	5	5	3	4	3	5	3	5	5	5
2	966	24	1	39	1.53	16.6603	1	1	1	3	1	1	1	4	1	2	4	1	1	1	1	5	5	1	5	1	1	1	5	5	6	1	6
2	967	21	1	75	1.73	25.0593	3	2	1	3	1	2	5	6	7	5	7	2	5	5	2	6	5	4	6	2	5	5	7	5	5	5	6
2	968	21	1	60	1.63	22.5827	2	2	0	2	1	5	5	6	6	7	7	4	4	5	3	7	6	5	6	5	4	3	6	5	7	2	7
2	971	22	1	70	1.78	22.0932	2	2	1	3	1	5	5	5	2	9	7	4	3	3	5	6	5	5	5	4	5	1	3	1	5	5	5
2	972	22	1					2	0	3	1	5	5	5	5	2	5	5	5	3	3	5	5	5	5	3	3	2	5	5	5	5	5
2	978	23	1	68	1.65	24.977	2	3	1	3	1	6	3	7	3	9	8	7	4	1	1	5	5	5	4	2	1	1	6	4	6	2	6
2	981	22	1	53	1.64	19.7055	2	2	1	1	1	3	4	5	5	9	7	9	9	5	1	5	5	8	6	3	3	1	6	8	5	6	5
2	982	20	1	69	1.63	25.9701	3	2	1	3	1	5	6	5	4	8	5	3	7	6	6	5	5	7	5	4	3	3	6	4	6	4	6
2	984	21	1	60	1.55	24.974	2	1	1	3	1	1	2	7	1	8	9	6	9	1	1	9	9	5	9	3	1	1	7	1	9	2	9
2	988	21	1	106	1.73	35.4172	4	1	1	3	1	8	5	5	3	9	9	5	3	6	3	5	5	7	6	3	3	3	7	5	5	5	7
2	989	23	1	75	1.63	28.2284	3	2	1	3	1	6	6	4	3	7	5	3	4	5	3	5	5	6	5	4	1	1	5	2	5	4	6
2	990	19	1	66	1.55	27.4714	3	3	1	3	1	7	7	4	5	6	5	5	6	6	4	5	5	6	5	4	6	7	5	7	5	5	5
2	992	22	1	60	1.59	23.7332	2	3	1	3	1	6	5	5	5	6	5	5	4	4	5	5	5	5	5	5	3	2	5	5	5	5	5
2	993	22	1	53.85	1.61	20.7747	2	1	1	1	1	1	2	6	1	1	8	5	3	2	4	8	9	5	8	2	1	2	7	2	7	4	7
2	996	22	1	51.1	1.59	20.2128	2	3	1	3	1	4	4	5	6	3	5	2	3	7	6	6	6	7	5	1	1	2	6	4	5	4	5
2	1016	20	1	57.5	1.66	20.8666	2	3	0	2	1	5	5	7	1	7	5	1	5	1	1	7	3	5	7	3	3	1	7	7	5	5	5
2	1018	22	1	42	1.57	17.0392	1	2	1	2	1	5	5	5	5	7	5	6	5	6	5	5	5	6	5	6	5	5	5	7	5	5	5
2	1024	23	0	64	1.71	21.8871	2	2	0	2	0	5	5	5	5	5	5	5	5	5	5	5	5	5	5	5	5	5	5	5	5	5	5
2	1027	21	1	43	1.5	19.1111	2	3	1	2	1	6	6	5	5	7	6	6	5	5	5	5	5	5	5	7	5	9	7	5	5	5	6
2	1032	22	1	63	1.51	27.6304	3	1	1	3	1	9	9	1	9	9	5	8	5	9	1	5	1	9	5	1	5	9	7	9	1	9	9
2	1037	22	1	52	1.57	21.0962	2	2	1	2	1	7	1	5	2	1	5	7	2	2	2	5	5	2	5	4	2	2	1	2	4	2	3
2	1038	22	1	63	1.66	22.8625	2	2	1	2	1	7	7	5	7	8	6	7	7	7	5	6	5	5	5	8	6	2	4	7	6	3	7
2	1040	18	1	77	1.54	32.4675	4	3	1	3	1	8	9	3	9	7	1	9	9	6	5	3	1	9	2	8	3	1	5	3	8	5	5
2	1041	23	1	85	1.56	34.9277	4	3	1	2	1	2	3	5	1	5	9	7	8	5	5	8	7	3	5	7	8	3	5	5	2	5	7
2	1043	23	1	47.7	1.66	17.3102	1	2	1	2	1	5	6	5	5	7	5	8	4	6	5	5	5	5	5	6	5	4	6	4	6	5	6
2	1045	19	1	48	1.52	20.7756	2	2	0	2	0	4	4	5	3	5	5	5	5	5	5	6	5	4	5	4	3	4	5	5	5	5	6
2	1048	24	1	51	1.7	17.6471	1	3	1	1	1	4	3	5	5	7	5	3	7	4	5	5	5	2	5	3	2	2	3	1	2	3	6
2	1050	22	0	68	1.75	22.2041	2	3	1	2	1	3	7	6	5	4	7	5	6	4	5	7	5	5	5	4	5	3	3	2	5	5	5
2	1051	22	1	62	1.63	23.3355	2	2	1	1	1	4	4	6	5	6	5	4	4	4	3	5	5	6	5	4	3	3	5	3	5	4	5
2	1052	24	0	52	1.71	17.7832	1	3	1	1	1	4	5	7	5	5	6	3	5	4	5	5	5	5	5	4	5	5	5	5	5	5	5
2	1056	20	1	50				1	1	3	1	5	6	5	6	6	5	5	5	5	5	5	5	5	5	6	5	5	3	5	5	5	9
2	1057	23	0	56	1.72	18.9292	2	1	1	2	1	7	8	5	8	8	7	8	5	6	5	6	4	6	4	3	2	2	6	4	4	5	7
2	1060	24	1	66	1.68	23.3844	2	2	1	3	1	1	7	5	5	1	5	7	5	1	1	7	5	5	5	3	3	1	5	1	5	1	7
2	1062	21	1	53	1.65	19.4674	2	2	0	3	1	5	8	6	7	5	4	9	4	6	9	6	7	6	3	7	6	9	5	1	5	9	5
2	1063	19	1	61.9	1.65	22.7365	2	2	1	3	1	7	7	1	7	9	1	9	5	9	5	5	7	1	5	1	1	1	7	9	7	5	7
2	1064	18	0	63	1.69	22.0581	2	2	1	3	1	7	6	3	6	6	4	6	5	2	5	5	5	5	4	7	4	5	3	5	4	7	6
2	1067	24	0	75	1.73	25.0593	3	2	0	2	1	6	7	6	6	7	7	3	5	6	3	5	6	5	5	4	5	4	5	5	5	5	5
2	1068	21	1	75	1.64	27.8852	3	2	1	3	1	8	6	5	5	9	5	7	9	9	6	7	7	9	5	8	7	5	5	9	5	5	5
2	1069	23	0	72	1.72	24.3375	2	1	1	1	1	6	7	5	6	7	5	5	5	6	5	6	5	5	6	5	7	4	5	4	6	5	5
2	1070	22	1	52	1.65	19.1001	2	3	1	3	0	7	6	5	5	7	5	6	5	7	5	5	5	6	5	7	3	5	5	4	5	5	5
2	1074	24	0	58	1.71	19.8352	2	3	1	2	1	2	3	8	3	6	7	3	4	2	3	9	8	4	8	2	1	2	8	5	8	5	9
2	1075	23	0	69	1.73	23.0546	2	3	0	2	0	2	2	5	2	4	8	2	2	3	1	7	9	6	7	5	5	5	5	5	5	5	5
2	1079	22	1	56	1.59	22.151	2	2	1	2	1	5	5	5	5	7	5	7	4	2	5	5	5	4	5	4	3	3	5	3	5	3	5
2	1081	22	1	56.8	1.65	20.8632	2	2	1	3	1	7	5	5	5	9	5	9	6	9	5	5	5	4	5	4	2	2	3	1	5	4	5
2	1083	23	1	68	1.56	27.9421	3		1	1	1	5	6	4	5	3	7	6	3	4	1	5	5	3	7	1	1	3	7	7	7	1	7
2	1085	23	1	98	1.73	32.7442	4	3	1	2	1	9	5	5	7	9	7	9	9	9	1	5	3	9	5	7	2	1	6	7	3	9	5
2	1091	19	1	50	1.6	19.5312	2	2	1	2	1	6	6	5	5	3	6	5	5	6	5	5	5	3	5	4	5	5	5	5	4	5	5
2	1095	20	1	51	1.72	17.239	1	2	1	2	1	3	3	5	6	4	6	4	5	3	4	5	6	6	6	4	3	2	5	1	6	5	6
2	1098	21	0	63	1.72	21.2953	2	2	1	3	1	7	5	5	5	9	7	5	6	7	5	7	5	9	5	4	5	3	6	5	7	5	5
2	1099	23	1	60	1.63	22.5827	2	2	1	1	1	2	5	5	5	7	5	3	3	2	3	5	5	5	5	4	5	3	5	5	5	5	5
2	1100	21	1	56				1	1	3	1	8	6	5	7	9	5	6	4	9	3	6	5	9	5	9	7	3	5	7	5	4	5
2	1102	19	1	74	1.7	25.6055	3	1	1	2	1	9	7	4	5	9	4	9	9	9	4	2	6	9	5	5	5	5	6	7	5	3	3
2	1103	21	1	82	1.7	28.3737	3	1	1	1	1	8	5	1	3	7	1	6	9	6	1	1	1	9	1	7	7	5	4	5	6	5	6
2	1104	20	0	86	1.74	28.4053	3		1	2	1	2	2	3	3	4	4	4	4	3	2	2	5	4	5	2	2	2	3	4	4	2	2
2	1106	20	0	90	1.81	27.4717	3	1	0	2	1	5	5	5	5	6	5	5	3	1	5	6	5	5	5	5	5	5	5	5	5	5	5
2	1110	20	0					2	1	3	1	1	1	5	6	3	5	7	3	1	3	6	5	4	6	8	4	1	5	2	5	1	6
2	1111	22	1	64	1.69	22.4082	2	1	1	3	1	5	5	3	6	7	6	6	4	6	4	4	6	4	4	6	6	6	5	5	6	5	6
2	1112	22	1	52	1.54	21.9261	2		1	3	1	2	2	5	2	8	5	9	2	6	5	5	5	5	5	9	2	1	5	5	5	5	5
2	1114	19	1	49	1.62	18.6709	2	1	1	1	1	2	1	5	2	7	5	2	2	2	2	7	7	5	5	7	1	1	6	1	6	4	8
2	1115	19	1	49	1.62	18.6709	2	1	1	1	1	2	1	5	2	7	5	2	2	2	2	7	7	5	5	7	1	1	6	1	6	4	8
2	1116	20	1	79	1.55	32.8824	4	2	1	3	1	6	6	3	4	9	6	6	2	1	1	9	3	6	6	1	1	1	9	9	5	1	5
2	1117	22	0	56	1.87	16.0142	1	2	1	1	0	4	4	5	4	5	6	5	4	4	4	5	6	5	6	5	5	3	5	5	5	5	6
2	1119	22	1	52	1.68	18.424	1	2	1	2	1	1	5	5	5	1	5	5	4	4	4	7	5	4	5	2	1	1	5	4	4	5	5
2	1120	22	1	66	1.61	25.462	3	3	1	3	1	7	7	5	6	7	5	5	7	7	5	6	5	5	5	5	5	5	7	4	5	5	5
2	1121	22	1	53	1.53	22.6409	2	1	1	2	1	1	1	5	5	7	5	1	1	1	1	5	5	5	5	6	5	1	5	1	5	5	5
2	1122	22	1	71	1.69	24.8591	2	2	1	2	1	7	8	1	5	9	1	8	9	8	3	5	1	8	2	9	7	3	1	7	2	9	5
2	1125	19	1	63	1.62	24.0055	2	2	1	3	1	1	1	5	1	9	6	5	3	1	5	5	7	2	7	2	1	1	9	9	9	5	6
2	1126	20	1	108	1.67	38.7249	4	1	1	3	1	9	9	5	9	9	5	9	7	9	7	5	5	6	5	9	9	9	9	9	5	9	5
2	1127	22	0	80	1.9	22.1607	2	3	1	3	1	2	4	5	3	6	5	2	5	3	4	5	5	5	6	3	2	1	6	2	4	3	5
2	1128	22	1	40.8	1.56	16.7653	1	2	1	1	1	1	2	5	2	1	5	2	2	1	1	5	5	3	5	1	1	1	5	3	5	1	5
2	1129	22	0	111	1.86	32.0846	4	2	1	1	1	3	4	6	7	9	8	5	9	2	5	7	7	8	6	8	7	9	6	8	7	7	8
2	1130	18	1	68	1.76	21.9525	2	2	1	3	0	2	5	5	3	1	6	4	1	1	5	6	5	2	5	3	3	3	5	5	6	3	6
2	1131	23	0	88	1.8	27.1605	3	2	0	3	1	6	5	5	5	7	6	5	5	5	4	6	5	5	5	3	5	5	5	5	5	5	5
2	1132	20	1	108	1.67	38.7249	4	1	1	3	1	9	9	5	9	9	5	9	7	9	7	5	5	6	5	9	9	9	9	9	5	9	5
2	1133	20	1	55	1.53	23.4952	2	2	1	3	1	5	8	5	5	4	3	8	3	8	3	5	3	7	3	3	5	3	5	5	3	3	5
2	1134	18	1	45	1.53	19.2234	2	1	1	1	1	1	3	5	1	6	5	1	1	1	5	5	5	5	5	2	1	3	5	1	5	1	5
2	1136	23	0	69	1.74	22.7903	2	1	1	3	1	9	9	5	5	7	5	4	3	3	3	5	5	7	5	5	3	3	5	5	4	3	5
2	1138	22	1	58	1.65	21.3039	2	1	1	2	1	5	3	7	4	5	7	5	4	4	3	5	7	3	5	5	5	5	5	4	4	4	5
2	1140	18	1	66	1.63	24.841	2	1	1	2	1	5	4	6	3	6	6	3	5	3	2	5	5	5	5	3	2	4	6	5	5	3	5
2	1141	20	1	53	1.58	21.2306	2	2	1	3	1	5	5	6	4	2	4	5	6	6	3	6	7	4	5	4	2	1	7	3	5	4	5
2	1142	23	1	65	1.73	21.7181	2	2	0	1	1	1	5	5	5	7	6	6	5	5	3	5	5	7	5	8	4	4	3	1	5	6	6
2	1143	23	1	62	1.6	24.2187	2	2	1	2	1	6	6	5	5	7	5	8	6	4	3	5	5	5	5	7	3	2	4	3	6	5	6
2	1146	18	0	75	1.83	22.3954	2	1	0	2	1	6	6	4	5	6	7	5	6	5	5	6	5	5	6	5	5	5	5	5	5	5	5
2	1148	22	0	96	1.7	33.218	4	2	0	2	1	5	5	5	5	9	5	5	5	5	5	9	5	5	5	5	5	1	5	5	5	5	5
2	1150	24	1	95	1.7	32.872	4	2	1	3	1	5	5	7	5	9	7	5	5	5	5	5	5	5	5	6	6	5	5	5	5	5	7
2	1152	18	1	54	1.64	20.0773	2	2	1	3	1	4	4	6	4	4	6	4	4	4	4	6	6	6	6	5	5	4	6	5	6	4	6
2	1155	22	1	58	1.69	20.3074	2	2	1	1	1	1	3	6	4	3	7	5	6	1	4	6	6	3	6	6	3	1	5	1	5	4	5
2	1157	24	1	75	1.72	25.3515	3	3	1	3	1	7	6	5	6	9	5	6	5	7	5	5	5	5	5	2	2	3	3	1	2	5	5
2	1158	18	1	80	1.72	27.0416	3	1	1	3	1	7	5	5	5	8	5	5	5	7	5	5	5	6	5	4	5	3	5	5	3	5	5
2	1161	23	0	88	1.77	28.089	3	2	1	3	1	7	5	5	6	9	5	7	1	7	3	6	6	7	5	7	6	5	1	5	3	1	5
2	1163	22	1	62	1.6	24.2187	2	2	1	3	1	5	6	5	5	7	5	5	3	5	5	5	5	4	5	5	5	6	5	5	5	5	5
2	1164	24	1	75	1.67	26.8923	3	1	1	1	1	7	7	5	5	8	7	8	5	7	5	6	5	5	6	3	3	3	7	3	5	5	6
2	1166	24	1	77	1.63	28.9811	3	1	1	3	1	9	5	5	5	9	5	9	5	9	5	5	5	9	5	9	4	6	5	2	2	5	5
2	1167	24	1	52	1.64	19.3337	2	3	1	1	1	3	3	6	1	2	7	2	6	2	5	7	7	6	5	1	1	1	6	1	8	5	8
2	1168	20	1	90	1.65	33.0579	4	1	1	3	1	2	2	5	5	7	6	6	1	1	5	7	5	1	5	4	4	2	5	4	6	5	6
2	1170	20	0	60	1.76	19.3698	2	3	0	2	0	5	5	5	5	5	9	5	8	5	5	9	5	5	5	5	5	5	5	5	5	5	5
2	1172	20	1	59	1.68	20.9042	2	2	1	2	1	1	5	5	5	1	7	3	5	3	3	7	7	5	5	5	3	5	6	4	5	5	6
2	1173	21	1	56	1.6	21.875	2	2	0	2	1	7	5	5	5	3	6	5	5	7	5	7	6	7	6	3	2	2	5	6	3	7	5
2	1174	23	0	65	1.8	20.0617	2	1	1	2	1	5	5	5	5	6	5	5	8	7	5	3	4	7	5	5	5	5	5	5	5	7	5
2	1175	22	0	64	1.67	22.9481	2	2	1	2	0	5	5	5	5	6	4	5	4	5	3	6	6	5	5	6	5	5	5	5	7	5	5
2	1176	22	1	60	1.73	20.0474	2	3	1	3	1	1	4	5	5	9	6	7	5	1	1	6	5	5	6	4	2	1	5	1	7	4	5
2	1177	24	0	65	1.74	21.4692	2	2	1	3	1	5	5	5	5	6	5	5	5	5	5	5	5	5	6	6	5	5	5	5	5	5	6
2	1178	20	1	48	1.57	19.4734	2	2	1	1	1	3	3	6	1	7	7	6	2	1	1	8	9	5	8	2	1	1	5	5	5	1	6
2	1179	18	1	53	1.57	21.5019	2	1	1	2	1	1	3	5	5	2	5	5	3	1	5	5	5	5	5	2	3	1	6	5	5	5	5
2	1181	20	1	52	1.56	21.3675	2	2	1	3	1	7	5	3	7	9	5	7	2	4	1	5	5	1	7	1	2	5	7	8	7	7	5
2	1182	21	1	53	1.63	19.9481	2	2	1	3	0	2	3	6	5	4	5	3	5	2	5	5	6	5	5	3	2	3	1	2	2	5	6
2	1183	22	1	53	1.6	20.7031	2	3	0	2	1	2	1	6	2	1	7	5	3	4	1	7	6	4	6	2	1	1	5	3	4	2	6
2	1185	21	0	116	1.95	30.5062	4	2	1	2	1	3	5	5	6	5	7	4	3	3	5	6	6	5	5	6	5	5	5	5	5	4	5
2	1187	20	2	54	1.78	17.0433	1	3	1	3	1	2	5	5	3	2	6	5	1	1	2	6	7	4	7	5	4	2	5	3	6	4	6
2	1192	21	0	63	1.73	21.0498	2	2	1	1	1	4	2	5	2	3	6	4	7	2	5	7	5	5	8	5	4	4	6	5	7	4	5
2	1193	20	1	55	1.62	20.9572	2	1	1	3	1	1	1	5	5	8	8	2	8	2	5	6	6	5	5	9	8	3	7	1	8	5	5
2	1196	22	1	50	1.63	18.8189	2	3	1	3	1	7	7	5	5	7	5	6	4	7	5	5	5	5	5	5	6	4	5	7	5	5	5
2	1198	23	0	75	1.73	25.0593	3	2	1	1	1	6	6	4	6	7	4	6	7	7	3	5	4	5	4	4	6	5	4	5	4	5	4
2	1199	20	1	57	1.62	21.7193	2	1	1	3	1	6	8	8	8	9	5	6	5	6	4	5	5	8	4	8	3	3	5	3	2	1	5
2	1200	18	1	60	1.55	24.974	2	2	1	3	1	1	7	5	8	9	6	2	4	1	6	5	3	4	6	3	7	2	6	1	5	5	5
2	1201	20	1					2	1	3	1	6	6	5	6	6	6	6	4	4	5	5	5	4	5	6	5	4	6	2	5	4	5
2	1205	21	1	81	1.56	33.284	4	2	1	3	1	8	7	5	9	9	5	7	9	9	5	1	5	7	5	9	7	7	5	9	5	8	5
2	1206	19	0	65	1.75	21.2245	2	2	0	2	0	1	3	5	5	1	5	3	5	2	4	5	5	5	5	2	2	1	2	2	5	2	2
2	1209	21	1	60	1.7	20.7612	2	3	0	1	1	7	7	5	7	8	5	6	2	7	3	5	5	2	5	3	3	5	5	5	3	5	5
2	1210	22	1	64	1.65	23.5078	2	2	0	1	1	3	3	5	3	1	5	3	3	1	1	5	5	1	5	1	1	1	5	1	5	5	5
2	1214	20	0	70	1.75	22.8571	2	1	1	3	1	2	3	5	5	5	5	4	4	2	5	5	5	5	5	5	5	4	6	4	5	5	5
2	1216	24	1	52	1.64	19.3337	2	3	1	1	1	3	3	6	1	2	7	2	6	2	5	7	7	6	5	1	1	1	6	1	8	5	8
2	1218	23	1	67	1.6	26.1719	3	2	1	3	1	7	4	5	4	8	5	3	3	2	2	7	5	5	5	8	3	3	5	3	5	1	5
2	1219	21	1	50.55	1.61	19.5016	2	2	1	2	1	7	6	6	5	7	5	5	5	5	5	5	5	5	8	5	7	5	7	5	5	5	6
2	1220	22	1	55.8	1.56	22.929	2	3	1	3	1	7	3	5	3	7	8	6	5	7	2	7	7	3	5	3	6	7	8	5	7	7	8
2	1222	20	1	53	1.63	19.9481	2	3	0	2	1	7	3	5	5	8	5	3	3	7	2	5	6	7	5	5	2	4	5	6	5	1	5
2	1223	20	1	65	1.7	22.4913	2	2	1	2	1	4	6	5	5	7	5	6	5	4	4	5	5	5	5	4	4	2	5	2	5	2	5
2	1224	24	1	60	1.63	22.5827	2	3	1	3	0	4	4	5	4	3	6	5	5	3	5	6	6	5	6	4	2	2	5	4	5	5	6
2	1225	24	1	61	1.63	22.9591	2	2	1	2	1	1	1	6	6	1	5	1	4	1	4	5	5	3	5	3	1	1	5	1	3	2	5
2	1232	19	1	97	1.6	37.8906	4	2	1	3	1	7	7	5	7	7	5	7	7	7	5	7	5	7	5	3	7	7	5	5	3	7	5
2	1234	21	1	64	1.58	25.6369	3	2	1	3	1	4	2	4	1	9	5	5	7	5	5	2	3	1	1	6	4	4	7	6	5	5	6
2	1237	23	1	58	1.57	23.5304	2	2	0	2	1	3	2	5	5	9	7	7	2	2	5	5	5	7	5	3	1	1	5	3	3	7	5
2	1239	19	0	58	1.75	18.9388	2	2	1	2	0	5	5	5	5	5	5	5	7	5	5	5	5	5	5	3	5	5	5	5	5	5	5
2	1243	20	1	72	1.6	28.125	3	3	1	2	1	7	5	5	5	4	5	7	4	7	5	6	4	5	3	4	5	5	5	5	5	6	5
2	1246	23	1	50	1.65	18.3655	1	2	1	1	1	3	3	6	4	6	6	3	3	3	3	6	6	3	6	4	4	4	6	3	6	3	6
2	1247	20	1	50	1.63	18.8189	2	3	1	3	1	7	6	5	6	8	5	9	7	6	5	4	5	7	5	6	6	5	5	7	3	5	6
2	1249	22	1	73	1.66	26.4915	3	2	1	3	1	6	7	5	7	9	6	8	5	2	5	5	5	6	6	6	5	3	6	6	6	5	5
2	1251	20	1	60	1.68	21.2585	2	2	0	2	1	7	6	5	4	9	5	8	5	6	4	5	5	7	5	4	3	1	5	7	7	5	5
2	1252	19	1	52	1.65	19.1001	2	2	0	2	1	9	3	5	4	6	5	7	5	8	5	5	6	7	5	5	1	1	3	2	5	3	5
2	1253	20	0	70	1.77	22.3435	2	2	1	3	1	4	4	6	4	7	8	3	3	1	3	8	8	3	8	3	3	1	8	1	8	1	8
2	1254	20	0	68	1.69	23.8087	2	2	1	3	1	6	5	5	5	8	5	7	7	7	5	6	5	5	5	6	5	5	6	7	5	6	5
2	1255	22	1	51	1.61	19.6752	2	3	1	1	1	2	4	5	4	6	5	4	1	1	2	5	5	4	6	4	3	4	2	6	4	6	6
2	1256	21	1	55	1.73	18.3768	1	1	1	3	1	6	4	5	5	7	6	5	4	6	5	5	5	5	6	4	4	5	6	5	5	5	6
2	1263	24	1	52	1.59	20.5688	2	2	1	1	1	2	3	5	5	6	5	2	1	1	4	6	6	3	5	2	2	1	5	3	4	3	5
2	1264	22	1		1.69			3	1	1	1	3	4	5	5	1	5	6	5	1	2	5	5	3	5	2	4	2	5	3	5	6	5
2	1266	22	1	63	1.64	23.4236	2	1	0	2	1	8	8	5	5	9	5	5	5	5	4	6	5	5	6	4	3	4	5	5	6	5	5
2	1267	24	1	74	1.64	27.5134	3	3	1	2	1	6	6	5	5	8	5	6	5	6	5	5	5	5	6	6	5	7	5	7	5	5	5
2	1268	23	0	75	1.8	23.1481	2	3	1	2	1	6	5	5	5	5	6	5	6	5	5	5	5	6	5	6	5	5	5	5	5	5	5
2	1269	22	0	72	1.75	23.5102	2	2	1	2	1	7	5	5	5	6	5	6	4	5	5	5	5	6	5	5	5	3	5	5	5	3	6
2	1272	21	1	58	1.55	24.1415	2	1	1	3	1	9	9	5	9	9	1	9	9	9	5	1	1	7	1	9	9	9	1	9	1	9	1
2	1273	21	1	50	1.61	19.2894	2	2	1	1	1	3	3	5	1	7	7	4	3	3	1	7	6	6	5	1	1	1	6	1	7	1	6
2	1274	21	1	58	1.55	24.1415	2	1	1	3	1	9	9	5	9	9	1	9	9	9	5	1	1	7	1	9	9	9	1	9	1	9	1
2	1275	21	1	75	1.74	24.7721	2	2	1	3	1	7	7	5	5	8	5	5	4	7	4	5	5	6	5	6	5	4	5	5	3	5	5
2	1276	21	1	80	1.61	30.863	4	2	1	2	1	7	6	4	1	9	2	9	8	8	5	2	5	8	1	7	2	1	2	8	2	5	5
2	1277	21	1	58	1.6	22.6562	2	2	1	2	1	3	3	5	6	5	5	3	6	5	3	6	6	5	6	4	2	1	1	1	6	2	6
2	1278	21	0	87	1.74	28.7356	3	3	1	3	1	5	5	2	5	7	5	6	5	2	2	5	5	7	6	5	5	4	5	5	5	5	5
2	1280	24	1	55	1.65	20.202	2	2	1	2	1	7	6	3	3	4	5	6	8	6	5	5	5	5	5	2	2	2	6	4	6	3	4
2	1281	20	1	66	1.7	22.8374	2	2	1	3	1	7	8	2	2	8	5	2	5	7	5	5	5	6	3	1	2	1	5	8	3	7	3
2	1282	20	1	70	1.7	24.2215	2	2	1	3	1	4	4	5	5	9	7	9	4	7	4	6	3	4	5	7	6	4	5	7	5	5	4
2	1283	23	1	50	1.59	19.7777	2	2	1	3	1	7	7	5	5	1	5	5	3	1	1	5	5	5	4	1	1	1	5	1	5	4	5
2	1285	20	1	45	1.55	18.7305	2	2	1	3	1	7	7	5	2	7	5	5	4	6	5	5	5	6	5	3	2	5	5	3	6	5	6
2	1286	20	1	48	1.65	17.6309	1	2	1	2	1	2	5	5	5	4	5	5	5	2	4	5	5	4	6	3	3	1	6	1	6	3	6
2	1287	19	1	78	1.52	33.7604	4	3	1	2	1	7	9	4	5	9	5	9	5	6	4	6	3	9	4	6	3	3	4	4	2	5	4
2	1288	21	1	56	1.64	20.8209	2	2	1	3	1	6	7	8	9	6	5	7	9	6	2	3	5	7	2	1	1	1	2	7	6	7	9
2	1289	20	1	58	1.6	22.6562	2	2	1	3	1	3	4	6	4	1	7	3	4	4	2	5	6	5	5	3	3	4	5	5	5	5	5
2	1290	21	1	69	1.45	32.8181	4	1	1	3	1	6	1	5	1	9	9	9	5	1	3	5	6	9	2	8	4	7	2	9	3	4	5
2	1291	23	1	50	1.52	21.6413	2	2	1	3	1	5	5	4	6	7	5	7	6	7	2	5	5	5	3	1	1	1	1	1	1	1	5
2	1293	20	1	54	1.57	21.9076	2	1	1	3	1	7	6	5	6	7	5	8	5	4	5	5	5	5	5	3	4	4	3	5	5	3	5
2	1294	21	1	53	1.63	19.9481	2	2	1	1	1	5	4	5	4	7	5	4	5	4	6	5	5	5	5	6	5	4	5	4	5	5	5
2	1296	21	1	61.5	1.58	24.6355	2	2	1	3	1	7	9	3	5	7	4	7	9	7	4	3	3	5	5	3	5	4	5	1	5	5	5
2	1297	21	1	101	1.69	35.3629	4	1	1	1	1	2	3	5	4	7	5	8	4	1	1	5	5	6	5	3	1	1	3	1	6	4	5
2	1298	19	1	64	1.65	23.5078	2	2	1	3	1	3	3	5	2	7	7	3	5	2	6	3	5	3	6	6	6	3	7	4	3	4	5
2	1299	20	1	49	1.53	20.9321	2	2	1	3	1	9	8	8	5	9	7	8	8	6	5	6	5	7	6	5	4	5	8	5	3	5	5
2	1302	20	1	48	1.65	17.6309	1	2	1	2	1	2	5	5	5	4	5	5	5	2	4	5	5	4	6	3	3	1	6	1	6	3	6
2	1306	21	1	53	1.63	19.9481	2	2	1	1	1	5	4	5	4	7	5	4	5	4	6	5	5	5	5	6	5	4	5	4	5	5	5
2	1307	21	1	55	1.73	18.3768	1	2	1	2	1	5	5	5	5	7	6	5	5	7	5	7	7	5	6	6	3	3	5	5	5	7	6
2	1308	23	1	62	1.6	24.2187	2	2	1	3	1	7	7	6	8	7	7	6	7	7	5	7	5	7	5	3	3	3	4	7	5	5	6
2	1310	22	1	74	1.59	29.271	3	2	1	3	1	7	7	5	5	7	6	5	5	6	5	5	5	7	5	6	5	7	8	4	5	5	7
2	1314	23	1	59	1.57	23.9361	2	2	1	3	0	3	5	5	5	7	5	5	1	1	5	5	5	5	5	2	3	3	5	5	5	3	5
2	1315	22	1	79	1.68	27.9904	3	1	1	3	1	6	6	2	6	9	5	8	5	7	1	5	4	5	4	3	7	8	5	6	5	9	5
2	1318	24	1	110	1.57	44.6266	4	1	1	2	1	1	1	5	5	9	5	9	5	1	5	7	5	9	5	9	1	1	5	1	6	5	5
2	1323	24	1	65	1.7	22.4913	2	2	0	2	1	1	2	5	7	7	5	5	4	1	3	5	5	5	5	7	1	2	6	1	5	5	5
2	1324	21	1	62	1.65	22.7732	2	2	1	3	1	7	7	5	4	2	5	7	4	6	3	5	5	6	6	2	3	2	5	1	6	3	6
2	1326	19	0	82	1.83	24.4857	2	2	1	2	1	6	7	5	4	6	5	4	4	4	5	5	6	4	5	3	5	4	5	5	5	5	5
2	1333	19	0	72	1.81	21.9774	2	3	1	3	1	5	5	5	5	6	6	6	5	5	5	6	5	5	5	5	5	5	5	5	6	5	6
2	1335	24	1	49	1.57	19.8791	2	2	1	2	1	4	4	5	5	4	5	5	6	4	5	5	5	6	5	3	3	3	6	3	5	3	5
2	1336	20	1	65	1.7	22.4913	2	3	1	2	1	3	8	5	8	5	5	8	7	2	5	6	5	7	3	7	5	2	2	2	2	7	5
2	1337	21	1	62.3	1.75	20.3429	2	3	1	3	1	7	6	5	6	7	5	7	4	6	4	5	5	7	5	6	7	4	5	6	5	5	5
2	1347	22	0	78	1.8	24.0741	2	2	1	3	1	5	5	5	5	6	6	5	4	4	5	6	5	5	6	4	5	5	5	5	6	5	5
2	1348	23	1	55	1.69	19.257	2	2	1	1	1	1	4	6	4	3	8	5	5	3	4	8	7	6	7	4	3	1	7	2	5	3	8
2	1350	21	1	62	1.6	24.2187	2	2	1	2	1	5	5	5	5	7	5	8	6	7	5	5	5	6	5	5	7	5	6	6	5	8	7
2	1351	22	1	54	1.53	23.0681	2	3	1	3	1	7	5	5	6	6	4	6	4	7	3	4	5	4	5	3	3	4	3	3	5	6	6
2	1352	24	1	51	1.65	18.7328	2	1	1	2	1	6	6	5	1	1	5	6	1	1	3	5	5	7	6	1	1	1	5	6	5	1	5
2	1353	20	1	54	1.6	21.0937	2	3	1	3	1	5	5	5	5	6	6	5	4	4	6	5	5	7	6	5	5	5	6	7	6	5	6
2	1355	22	1	90	1.78	28.4055	3	2	1	3	1	6	7	5	5	6	4	6	3	2	2	5	6	3	5	6	3	1	5	5	3	6	6
2	1356	23	1	55	1.69	19.257	2	2	1	1	1	1	4	6	4	3	8	5	5	3	4	8	7	6	7	4	3	1	7	2	5	3	8
2	1357	23	1	55	1.69	19.257	2	2	1	1	1	1	4	6	4	3	8	5	5	3	4	8	7	6	7	4	3	1	7	2	5	3	8
2	1371	18		89	1.65	32.6905	4	3	1	3	1	9	8	1	9	9	1	9	9	9	8	2	1	9	3	6	1	5	5	5	6	9	5
2	1382	24	1	126	1.75	41.1429	4	3	1	3	1	8	7	5	7	8	5	7	3	9	3	6	5	7	5	8	9	9	5	5	2	8	5
2	1383	24	1	65	1.61	25.0762	3	1	1	2	1	8	6	5	7	9	5	5	8	7	4	6	5	7	6	6	5	4	4	4	6	3	6
2	1390	24	1	59.8	1.64	22.2338	2	3	1	3	1	4	5	7	3	8	7	4	5	4	4	5	5	5	5	4	4	3	5	4	5	5	5
2	1394	24	1	59	1.64	21.9363	2	2	1	3	1	5	5	5	5	9	5	8	3	1	5	5	5	5	5	7	5	7	5	5	5	7	5
2	1407	20	0	55	1.65	20.202	2	1	1	2	1	5	6	5	5	6	5	5	5	5	5	6	5	5	5	5	5	5	5	5	5	5	5
2	1411	21	1	50	1.61	19.2894	2	3	1	1	1	6	8	6	3	6	7	5	6	3	7	4	6	5	7	6	7	7	5	5	9	9	5
2	1414	23	0	125	1.9	34.626	4	2	1	3	1	7	7	5	7	3	5	7	5	7	5	5	5	6	5	4	7	3	5	7	5	5	5
2	1417	23	1	46	1.58	18.4265	1	2	1	3	1	1	2	5	2	8	5	2	5	1	5	5	5	5	5	5	2	2	5	1	5	5	5
2	1418	23	1	52	1.57	21.0962	2	3	0	2	1	2	2	8	3	1	9	4	4	2	5	9	5	6	4	2	2	2	5	3	2	5	6
2	1420	23	1	48	1.62	18.2899	1	1	0	3	1	8	5	5	5	9	5	4	4	2	1	5	5	5	6	2	1	1	5	5	5	2	5
2	1423	19	1	69	1.69	24.1588	2	1	0	2	0	1	9	5	5	9	5	9	1	1	5	5	5	1	5	4	1	6	7	5	5	3	6
2	1426	22	1	70	1.65	25.7117	3	2	1	3	1	7	7	5	7	7	1	6	5	6	5	5	5	5	5	7	1	1	5	8	5	7	5
2	1427	20	1	58	1.67	20.7967	2	1	1	1	0	5	5	5	5	5	5	5	5	5	5	5	5	5	5	5	5	5	5	5	5	5	5
2	1429	19	1	57	1.65	20.9366	2	1	1	3	1	7	5	5	7	9	5	7	5	7	5	5	5	5	5	4	4	4	5	5	5	5	5
2	1430	22	1	80	1.62	30.4832	4	1	1	1	1	3	7	5	8	9	5	7	4	9	3	5	4	8	4	3	1	2	4	7	4	6	5
2	1431	22	1	52	1.66	18.8707	2	2	1	2	1	6	6	7	8	9	3	9	9	6	7	3	1	5	4	3	5	1	5	5	4	4	5
2	1432	23	1	57	1.66	20.6852	2	2	1	1	1	3	6	5	6	7	5	7	5	1	4	5	5	4	5	3	1	2	3	7	4	5	5
2	1433	21	1	50	1.67	17.9282	1	1	1	3	1	8	4	5	5	9	5	9	3	9	5	5	5	9	5	1	3	1	5	9	5	5	5
2	1434	20	1	48	1.58	19.2277	2	3	1	3	1	8	7	3	8	4	5	4	5	3	5	5	6	5	6	2	7	3	7	4	5	5	6
2	1437	24	1	60	1.73	20.0474	2	2	1	2	1	4	5	5	4	6	5	6	5	5	5	5	5	6	5	3	3	5	4	5	5	5	6
2	1438	21	0	66	1.82	19.9251	2	1	1	3	1	2	4	7	3	2	8	5	7	1	4	5	8	1	8	1	2	1	9	5	8	5	9
2	1439	19	0	79.3	1.75	25.8939	3	2	1	3	1	7	5	3	5	9	5	4	3	3	3	5	3	3	5	2	3	3	2	5	3	2	5
2	1440	18	0	63	1.7	21.7993	2	3	0	2	1	4	4	5	5	2	6	4	3	2	2	5	5	6	5	1	5	2	5	4	6	4	5
2	1444	20	0	63	1.72	21.2953	2	2	1	3	1	3	3	7	1	7	7	3	2	1	2	5	5	3	7	3	2	1	7	1	5	5	5
2	1445	21	1	54	1.58	21.6311	2	3	1	3	1	2	2	7	2	7	7	2	5	2	5	7	7	5	7	2	2	1	7	1	7	5	5
2	1446	24	0	103	1.8	31.7901	4	2	1	3	0	5	7	5	7	9	6	8	3	3	3	7	5	7	5	7	5	9	5	5	4	7	5
2	1447	20	1	59	1.69	20.6575	2	2	1	3	1	3	3	5	7	8	5	3	2	3	3	5	6	5	6	3	3	4	4	2	5	4	7
2	1448	22	0	85	1.88	24.0493	2	3	1	3	1	2	2	7	1	1	7	1	6	1	1	7	6	1	6	3	6	1	8	1	6	1	7
2	1449	22		50	1.64	18.5901	2	1	1	1	1	3	6	4	3	7	8	2	6	3	3	5	7	3	5	4	3	2	6	2	2	4	7
2	1450	22	1	51	1.55	21.2279	2	1	0	2	1	3	5	5	5	7	5	5	8	3	5	8	8	5	6	2	6	1	1	6	3	2	3
2	1451	24	1	86	1.6	33.5937	4	2	1	3	1	7	9	5	9	9	5	9	5	3	1	5	5	9	5	9	7	5	5	9	1	9	5
2	1453	21	1	62	1.63	23.3355	2	2	0	2	1	1	5	5	5	9	7	5	3	1	1	9	7	5	7	1	5	1	5	1	7	1	5
2	1454	24	0	86	1.74	28.4053	3	2	1	3	1	2	2	6	2	7	8	1	1	1	1	5	9	1	5	5	5	2	8	3	5	2	9
2	1455	21	1	55	1.58	22.0317	2	3	1	3	1	7	8	5	4	6	7	8	7	7	5	7	4	5	5	6	6	8	5	5	2	7	5
2	1456	19	0	150	1.84	44.3053	4	2	1	3	1	5	7	6	7	9	5	4	4	4	9	5	6	6	6	4	6	8	6	8	6	8	5
2	1457	19	1	48	1.55	19.9792	2	2	0	2	1	1	5	7	4	6	8	2	5	2	5	7	9	5	6	4	1	4	5	5	7	4	6
2	1459	21	0	70	1.74	23.1206	2	1	1	2	1	5	5	5	5	7	6	5	3	2	5	5	5	5	5	6	5	4	6	5	5	4	6
2	1460	24	0	123	1.85	35.9386	4	2	0	3	1	4	7	5	8	9	5	9	7	3	5	6	6	8	5	5	6	3	5	5	6	7	5
2	1462	23	0	84	1.88	23.7664	2	1	1	2	1	7	5	5	5	7	8	5	5	8	4	6	5	7	5	5	5	7	5	8	5	5	6
2	1464	20	1	50	1.7	17.301	1	3	0	2	1	7	7	5	7	9	5	4	3	7	5	5	5	2	5	3	5	5	5	5	4	6	5
2	1466	23	1	52	1.59	20.5688	2	1	1	2	1	3	3	5	6	3	5	4	4	4	3	7	7	5	5	2	3	2	5	2	4	5	6
2	1467	21	1	65	1.66	23.5883	2	3	1	2	1	7	7	5	4	1	5	8	6	3	2	5	5	7	5	7	2	1	5	6	5	4	6
2	1470	23	1	73	1.67	26.1752	3	2	1	3	1	8	6	4	6	7	5	6	5	8	4	5	5	6	5	6	4	5	5	6	5	7	5
2	1472	19	1	85	1.61	32.7919	4	2	1	1	1	3	3	7	3	3	5	2	5	3	3	7	6	6	6	2	2	5	7	7	7	7	7
2	1475	22	1	66	1.68	23.3844	2	2	1	3	1	7	6	5	8	7	6	4	4	5	3	5	5	6	5	6	5	4	5	8	5	4	6
2	1476	24	1	56	1.7	19.3772	2	1	1	2	1	7	7	5	8	9	5	9	9	9	3	5	5	7	3	8	2	3	5	7	5	9	7
2	1477	22	1	80	1.7	27.6817	3	3	1	3	1	8	5	4	1	9	6	5	9	9	3	4	9	5	5	9	9	9	9	9	9	9	9
2	1478	22	1	60	1.6	23.4375	2	2	0	2	0	7	1	5	1	1	5	5	1	7	1	5	5	7	5	7	1	3	6	6	5	4	5
2	1479	24	1	53	1.69	18.5568	2	2	0	2	1	2	3	5	5	3	6	6	5	3	5	7	5	5	5	3	5	3	6	3	5	4	6
2	1480	23	1	48	1.54	20.2395	2	1	1	3	1	6	8	5	5	6	6	7	9	6	5	1	5	5	5	6	7	5	5	3	5	5	5
2	1483	21	1	83	1.61	32.0204	4	1	1	3	1	6	4	5	7	8	4	2	5	7	1	1	1	6	2	7	6	5	5	6	6	5	5
2	1485	21	1	66	1.7	22.8374	2	3	1	3	1	7	7	5	5	7	6	5	3	7	5	4	5	8	5	5	3	1	5	9	7	5	9
2	1487	21	1	83	1.75	27.102	3	1	1	3	1	7	7	4	6	9	5	7	4	7	6	2	5	2	5	4	6	5	4	7	4	5	5
2	1488	18	1	57	1.53	24.3496	2	2	1	3	1	6	7	4	5	6	5	6	5	7	5	5	5	4	5	6	5	6	5	5	4	5	5
2	1489	22	1	62	1.67	22.231	2	2	1	3	1	9	9	5	9	9	5	9	7	9	7	5	5	1	5	9	8	8	4	9	5	7	5
2	1490	20	1	66	1.74	21.7994	2	2	1	3	1	7	9	5	4	8	5	3	5	4	2	7	5	8	6	3	2	4	5	7	5	3	7
2	1491	18	1	47.5	1.61	18.3249	1	3	0	2	0	1	1	5	1	3	6	3	5	2	1	5	5	5	5	4	1	4	5	5	5	4	5
2	1493	20	1	78	1.65	28.6501	3	2	1	3	1	1	7	5	1	1	9	8	4	1	1	9	9	7	9	1	1	1	9	1	7	1	9
2	1494	22	1	50	1.56	20.5457	2	2	1	3	1	7	7	5	4	8	7	5	6	6	5	5	5	3	5	6	3	5	5	5	3	5	5
2	1495	24	1	61	1.69	21.3578	2	1	1	1	0	1	1	5	1	5	5	1	1	1	5	5	5	5	5	1	1	1	5	1	5	1	5
2	1499	22	1	56	1.65	20.5693	2	2	0	2	1	1	9	5	7	9	6	9	3	2	8	5	5	1	5	9	8	8	3	3	4	8	6
2	1500	23	0	73	1.8	22.5309	2	1	1	3	1	1	2	5	8	9	5	9	9	9	5	5	5	9	5	1	9	9	5	9	5	9	5
2	1501	23	1	90	1.7	31.1419	4	2	1	3	1	9	9	1	9	9	5	9	5	9	9	5	5	5	5	9	9	5	5	1	5	9	5
2	1506	19	1	65	1.64	24.1672	2	1	1	3	1	9	5	5	5	9	5	7	5	9	5	5	5	5	5	7	1	1	5	1	3	1	5
2	1507	20	1	60	1.64	22.3081	2	1	1	1	1	2	2	4	2	2	7	2	7	2	2	8	8	6	5	1	1	1	5	1	1	1	5
2	1508	22	1	53.5	1.65	19.6511	2	3	1	3	1	2	6	5	6	7	5	3	4	1	4	5	5	4	5	3	4	2	5	1	5	3	5
2	1509	21	1	51	1.55	21.2279	2	1	1	3	1	6	5	5	5	7	6	6	3	7	3	5	5	5	5	1	4	1	5	5	7	5	5
2	1511	19	1	59	1.67	21.1553	2	3	1	1	1	6	3	1	2	9	5	3	8	1	8	1	7	9	2	5	5	5	5	3	5	5	5
2	1514	22	1	65	1.75	21.2245	2	3	0	2	1	1	7	5	5	3	6	5	5	5	5	5	5	5	5	5	6	5	3	1	5	5	5
2	1516	23	1	41	1.59	16.2177	1	2	0	2	1	4	5	5	5	4	5	5	5	4	4	5	5	4	5	4	5	4	5	5	5	5	5
2	1517	23	1	80	1.63	30.1103	4	3	1	1	1	7	5	4	6	9	3	7	5	8	5	5	4	7	6	6	4	5	2	5	2	5	6
2	1518	24	1	56	1.56	23.0112	2	1	1	3	1	4	4	5	4	8	8	4	5	4	5	8	8	5	9	4	3	3	5	3	8	3	5
2	1519	19	1	62	1.67	22.231	2	2	1	3	1	4	6	5	5	9	6	4	9	2	1	2	4	5	3	7	7	7	4	5	4	4	6
2	1521	19	1	66	1.7	22.8374	2	3	1	3	1	5	3	6	2	9	7	7	7	5	8	5	8	1	5	9	4	3	4	9	5	7	5
2	1522	21	0	82	1.89	22.9557	2	2	0	2	0	5	5	5	5	5	5	5	5	5	5	5	5	5	5	5	5	5	5	5	5	5	5
2	1523	20	1	63	1.58	25.2363	3	2	1	1	1	2	6	6	3	7	5	7	2	2	2	6	5	6	5	5	5	3	2	5	1	6	5
2	1524	21	1	44	1.56	18.0802	1	3	1	1	1	3	5	7	5	3	7	3	5	3	4	5	5	5	7	2	2	2	5	3	7	5	7
2	1525	22	1	43	1.63	16.1843	1	3	1	1	1	1	3	7	3	7	8	3	3	1	2	7	6	5	6	5	3	5	7	2	5	5	6
2	1526	22	1	43	1.63	16.1843	1	3	1	1	1	1	3	7	3	7	8	3	3	1	2	7	6	5	6	5	3	5	7	2	5	5	6
2	1528	24	1	59	1.64	21.9363	2	2	1	2	1	7	5	5	4	7	7	6	5	5	4	5	6	4	5	7	2	1	5	4	5	5	7
2	1529	21	0	65	1.72	21.9713	2	2	1	3	1	5	5	6	4	8	6	3	4	2	5	5	5	7	5	4	3	3	6	6	5	4	5
2	1530	19	1	54.86	1.67	19.6708	2	1	1	1	1	9	1	5	4	9	8	1	9	9	5	7	7	9	9	4	1	1	5	9	8	1	5
2	1531	21	1	60	1.58	24.0346	2	1	1	1	1	4	3	5	3	4	6	2	2	1	5	7	5	4	6	4	3	3	3	3	7	4	7
2	1534	23	1	68	1.59	26.8977	3	2	1	3	1	9	9	1	9	9	1	9	9	9	5	1	1	9	1	9	8	1	1	9	1	9	1
2	1535	20	1	76	1.78	23.9869	2	1	1	3	1	9	9	5	9	9	5	9	9	9	4	9	3	9	5	9	3	9	5	5	1	9	4
2	1536	23	1	74	1.55	30.8012	4	2	1	2	1	8	8	8	8	9	8	7	5	5	4	5	5	1	5	6	5	5	3	3	5	5	5
2	1537	24	1	60	1.63	22.5827	2	3	1	3	1	5	5	5	5	5	5	5	5	5	5	7	7	5	5	5	4	3	5	5	5	5	5
2	1538	19	0	63	1.74	20.8086	2	2	0	1	0	4	7	5	7	8	5	6	9	4	5	5	5	7	5	5	5	5	5	5	6	5	5
2	1540	22	1	70	1.7	24.2215	2	2	1	1	1	5	7	5	7	7	5	7	2	7	2	5	7	5	5	2	2	2	7	5	5	5	7
2	1542	24	1	65	1.53	27.7671	3	2	1	3	1	9	5	1	5	9	5	8	9	9	5	1	5	9	5	9	5	9	9	9	9	9	5
2	1543	19	1	57	1.65	20.9366	2	2	1	1	1	3	3	4	3	7	7	5	5	3	3	6	6	4	6	4	4	3	3	4	6	4	7
2	1544	23	1	61	1.57	24.7475	2	2	1	3	1	9	9	5	9	9	5	9	9	9	9	5	5	9	5	1	5	5	5	9	9	9	5
2	1546	22	1	48	1.68	17.0068	1	2	1	3	1	5	6	4	6	9	4	5	9	8	9	1	5	1	5	9	9	9	1	1	1	9	1
2	1547	21	0	70	1.73	23.3887	2	3	1	2	1	3	3	7	3	7	5	2	3	1	1	7	7	5	6	3	3	3	4	4	5	4	6
2	1551	22	1	63	1.55	26.2227	3	1	1	3	1	9	9	3	7	9	3	9	3	9	2	2	1	6	3	7	8	9	5	5	2	5	5
2	1552	20	1	58	1.64	21.5645	2	1	1	1	0	4	6	5	6	6	5	5	4	6	4	5	6	4	6	6	3	6	5	5	5	6	5
2	1558	18	0	70	1.85	20.4529	2	1	1	2	1	3	3	6	3	7	5	3	5	3	3	6	5	5	5	3	3	3	5	3	6	3	5
2	1559	19	1	65	1.71	22.2291	2	3	1	1	1	7	7	5	4	9	8	4	5	3	8	8	7	2	5	8	5	1	9	8	5	3	5
2	1561	20	1	62	1.69	21.7079	2	3	1	2	1	6	5	5	4	7	5	7	4	5	5	5	5	4	5	7	5	4	6	5	5	6	5
2	1562	23	1	55	1.6	21.4844	2	2	1	1	1	6	1	5	4	3	6	2	5	4	5	6	5	3	5	3	2	1	2	6	5	5	5
2	1563	24	1	65	1.63	24.4646	2	1	1	3	0	2	1	6	1	3	6	1	5	1	4	4	1	1	4	1	1	1	5	5	5	1	5
2	1564	22	1	53.5	1.57	21.7047	2	2	1	3	1	1	1	2	1	9	6	2	1	1	1	7	7	6	4	1	1	1	4	6	6	3	7
2	1565	23	1	55	1.6	21.4844	2	2	1	1	1	6	1	5	4	3	6	2	5	4	5	6	5	3	5	3	2	1	2	6	5	5	5
2	1566	19	1	63	1.67	22.5896	2	2	1	3	1	1	1	5	1	9	5	9	3	9	5	5	5	9	6	2	1	1	6	1	5	1	5
2	1580	20	0	68	1.8	20.9877	2	3	1	1	1	5	5	5	5	7	5	7	5	5	5	5	5	5	5	5	5	5	5	5	6	5	5
2	1581	20	0	64	1.75	20.898	2	3	1	1	1	2	3	8	7	1	8	4	4	1	1	6	8	5	8	2	3	2	6	5	6	3	6
2	1582	21	1	72	1.65	26.4463	3	1	1	3	1	9	1	5	1	9	5	9	1	9	1	5	5	5	5	7	5	9	3	5	1	9	4
2	1586	24	1	57	1.68	20.1956	2	2	1	2	1	5	7	5	5	8	7	7	7	5	6	5	4	5	5	7	5	5	5	5	4	7	7
2	1603	24	1							1	0	2	2	7	3	2	6	2	6	1	1	3	4	6	2	6	8	9	5	6	6	6	7
2	1606	21	1	83	1.67	29.7608	3		0	2	0	1	5	5	5	5	5	5	5	5	5	5	5	1	5	5	5	1	5	5	5	5	5
2	1614	20	1	76	1.62	28.959	3	2	1	3	1	5	5	6	5	8	7	8	6	2	5	5	5	6	5	3	5	3	2	5	5	5	5
2	1615	22	1	100	1.6	39.0625	4	1	1	1	1	2	2	3	2	1	5	3	2	1	1	4	5	5	4	1	1	1	5	1	5	5	6
2	1617	21	1	60	1.55	24.974	2	1	1	3	1	9	6	5	8	9	6	9	9	9	5	5	3	8	4	3	3	6	3	3	2	6	3
2	1618	21	1	54	1.6	21.0937	2	1	1	1	1	4	7	4	7	8	5	4	4	3	4	5	5	1	5	7	5	4	6	4	5	5	5
2	1619	23	1	64	1.69	22.4082	2	3	1	3	1	1	1	6	4	1	7	3	5	1	3	6	6	6	6	6	1	1	5	1	6	4	6
2	1620	22	1	66	1.65	24.2424	2	2	1	3	1	1	3	6	5	6	7	5	5	1	5	7	5	7	8	1	1	1	7	1	5	5	7
2	1621	20	1	60	1.6	23.4375	2	2	1	3	1	1	9	1	5	9	1	9	1	1	1	1	1	1	1	1	1	1	1	1	1	1	5
2	1622	22	1	66	1.65	24.2424	2	2	1	3	1	1	3	6	5	6	7	5	5	1	5	7	5	7	8	1	1	1	7	1	5	5	7
2	1624	21	1	56	1.66	20.3223	2	3	1	1	1	1	1	5	1	1	5	1	1	1	1	5	5	1	5	1	1	1	5	1	5	1	5
2	1625	21	0	68	1.7	23.5294	2	2	1	2	1	3	3	5	5	3	7	3	3	2	4	7	8	3	4	3	2	2	5	2	7	2	6
2	1626	22	1	70	1.7	24.2215	2	2	1	2	1	7	3	3	7	9	5	9	2	7	1	5	5	5	5	3	3	5	1	5	1	5	5
2	1627	21	0	90	1.79	28.089	3	2	0	3	1	9	9	5	5	9	5	9	3	8	3	5	5	9	5	9	9	2	9	1	6	5	5
2	1628	24	1	56	1.65	20.5693	2	1	1	3	1	3	4	8	5	7	8	3	7	3	3	8	8	7	7	3	1	2	5	3	6	3	8
2	1629	24	1	77	1.75	25.1429	3	3	1	2	1	4	3	5	3	5	6	5	4	3	4	6	5	5	5	4	3	3	5	3	3	5	6
2	1630	22	1	70	1.7	24.2215	2	2	1	2	1	7	3	3	7	9	5	9	2	7	1	5	5	5	5	3	3	5	1	5	1	5	5
2	1631	21	1	57	1.64	21.1927	2	2	1	1	1	5	5	5	5	8	5	5	5	2	5	6	5	6	5	6	5	2	5	3	5	3	5
2	1633	19	0	75	1.72	25.3515	3	3	0	2	1	8	8	8	8	9	8	8	6	4	3	5	6	5	5	2	1	2	6	5	6	5	6
2	1634	20	1	70	1.67	25.0995	3	2	1	3	1	9	9	5	5	9	5	7	7	9	5	5	5	1	5	9	9	9	4	9	4	6	5
2	1635	23	1		1.6			2	1	3	1	7	3	5	3	2	5	8	6	7	5	5	5	7	3	7	5	1	5	6	5	3	5
2	1637	21	1	72	1.68	25.5102	3	2	1	3	1	9	1	5	3	9	6	7	1	1	1	5	5	5	7	9	1	3	5	5	5	5	7
2	1638	22	1	49	1.63	18.4425	1	2	1	2	1	6	3	5	4	6	5	4	4	4	5	5	5	5	5	2	4	2	5	5	5	4	5
2	1639	22	0	72	1.66	26.1286	3	2	1	3	0	3	3	7	5	7	7	3	5	3	7	5	7	7	7	3	3	3	7	3	7	3	7
2	1640	23	1	64.2	1.69	22.4782	2	2	1	1	1	9	1	5	9	1	5	7	9	1	5	5	5	1	5	1	1	1	5	9	5	7	5
2	1642	22	1	74	1.63	27.852	3	2	1	3	1	7	8	5	8	8	6	8	5	7	5	6	5	5	5	6	6	5	5	3	5	6	6
2	1643	22	1	74	1.63	27.852	3	2	1	3	1	7	8	5	8	8	6	8	5	7	5	6	5	5	5	6	6	5	5	3	5	6	6
2	1644	23	1	58	1.75	18.9388	2	2	1	3	1	1	2	5	1	4	6	2	4	1	2	5	6	4	6	2	4	2	6	5	5	3	5
2	1646	19	1	60	1.68	21.2585	2	3	1	3	1	1	9	5	5	9	7	9	6	9	5	5	5	9	5	9	9	9	5	1	7	5	5
2	1659	24	1	55	1.59	21.7555	2	2	0	2	1	6	5	3	4	8	3	7	6	6	5	3	3	6	3	6	6	6	7	7	5	5	7
2	1666	24	0	63	1.8	19.4444	2	2	0	2	1	1	1	9	2	2	8	2	3	3	2	7	8	6	8	4	8	5	9	5	8	5	8
2	1668	23	1	50	1.6	19.5312	2	2	1	1	1	2	5	6	3	1	7	4	1	1	5	6	7	5	6	3	1	1	6	4	6	4	6
2	1671	24	1	69	1.8	21.2963	2	3	1	1	0	7	6	5	5	8	5	6	4	8	5	5	5	6	5	6	5	4	5	4	6	6	7
2	1675	23	1	59	1.63	22.2063	2	2	1	3	1	4	3	5	3	9	6	4	4	4	4	4	4	7	7	7	5	5	5	3	5	5	5
2	1679	24	0	68	1.8	20.9877	2	1	0	2	1	7	5	5	5	6	5	6	6	6	5	5	4	5	5	6	5	5	5	5	4	4	6
2	1680	22	0	73	1.8	22.5309	2	3	1	2	1	8	7	5	7	9	4	7	7	8	4	6	6	6	6	8	6	5	2	2	5	3	5
2	1683	24	1	38	1.47	17.5853	1	1	1	2	1	5	6	3	2	6	7	1	1	1	1	7	4	4	7	1	1	1	5	5	5	5	5
2	1685	24	1	65	1.58	26.0375	3	2	1	3	1	7	7	5	6	6	7	5	5	7	7	5	5	5	5	5	5	5	5	7	7	5	8
2	1688	19	1	45	1.57	18.2563	1	1	1	3	1	1	1	3	1	7	8	2	7	2	1	4	5	1	3	6	5	7	9	9	6	5	7
2	1690	23	1	90	1.75	29.3878	3	2	1	3	1	5	6	4	6	8	6	6	7	4	6	3	6	6	5	8	8	8	4	5	3	3	3
2	1694	21	1	67	1.76	21.6296	2	1	1	3	1	7	5	5	5	6	6	5	4	7	4	6	5	8	5	5	5	7	5	5	7	5	5
2	1696	24	1	52	1.62	19.8141	2	2	1	1	1	2	2	5	6	1	5	6	4	4	5	5	5	5	5	2	5	1	5	1	5	5	5
2	1700	24	1	65	1.58	26.0375	3	2	1	3	1	7	7	5	6	6	7	5	5	7	7	5	5	5	5	5	5	5	5	7	7	5	8
2	1701	23	0	70				2	1	1	1	1	1	5	1	1	3	1	1	1	3	7	5	3	1	1	1	1	3	1	5	5	5
2	1702	23	1	58	1.7	20.0692	2	3	1	1	1	5	5	5	5	1	5	5	3	3	5	5	5	5	5	1	2	1	4	4	6	5	5
2	1704	19	1	65	1.53	27.7671	3	2	1	3	1	8	7	2	5	9	5	7	6	8	6	3	3	6	4	7	6	7	3	6	2	4	6
2	1706	23	0	76	1.87	21.7335	2	2	1	2	1	6	6	3	5	7	4	6	6	6	7	4	4	5	4	1	1	1	1	1	6	2	6
2	1707	21	0	110	1.73	36.7537	4	3	1	3	1	5	8	3	4	9	4	7	8	9	5	4	6	9	3	8	6	2	5	8	3	5	5
2	1708	21	1	42	1.5	18.6667	2	2	1	1	1	2	5	5	5	8	5	7	5	3	5	5	5	5	5	4	6	3	5	2	4	7	6
2	1710	20	1	70	1.59	27.6888	3	1	1	3	1	2	4	5	6	4	5	7	5	2	3	6	5	5	4	4	3	2	5	1	5	4	6
2	1711	20	1	67	1.73	22.3863	2	1	1	1	1	2	2	5	4	3	6	6	3	3	4	5	5	6	6	3	1	1	3	1	5	4	6
2	1712	23	0	72	1.79	22.4712	2	3	1	3	1	7	7	2	8	5	5	8	8	9	5	5	5	5	5	2	9	1	1	7	5	5	5
2	1713	20	1	77.2	1.52	33.4141	4	2	1	3	1	8	6	5	7	9	5	7	5	9	6	6	5	7	8	4	4	4	7	4	5	5	5
2	1714	23	1	75	1.74	24.7721	2	2	1	2	1	3	3	5	5	8	5	3	3	1	2	5	5	4	5	7	3	1	7	1	5	7	5
2	1715	22	1					2	1	1	1	3	7	5	7	9	5	3	1	1	1	5	7	5	7	1	1	1	7	9	5	3	7
2	1718	20	0	110	1.86	31.7956	4	2	1	3	1	8	5	3	7	9	3	3	1	4	2	4	4	8	4	9	4	9	5	5	2	8	5
2	1719	21	1	61	1.63	22.9591	2	3	1	3	1	9	5	1	9	9	1	9	5	9	1	5	1	9	5	1	1	1	1	1	5	5	9
2	1720	22	1	60	1.7	20.7612	2	1	1	3	1	6	7	7	5	8	8	6	8	6	6	7	6	9	8	6	6	8	8	9	8	6	9
2	1721	19	1	57	1.74	18.8268	2	1	0	3	1	4	9	5	9	9	5	9	5	4	3	5	5	5	8	5	4	1	1	1	5	4	5
2	1722	18	1	58	1.6	22.6562	2	3	1	3	1	3	7	5	4	7	6	6	5	3	5	5	5	7	5	7	6	3	5	4	6	5	6
2	1723	18	1	65	1.7	22.4913	2	2	1	2	1	9	9	5	9	9	7	9	3	3	5	5	5	5	5	9	2	1	7	1	7	5	6
2	1724	23	0	75	1.71	25.6489	3	2	1	3	1	7	5	5	8	8	5	8	9	3	5	5	5	9	5	9	9	4	7	3	5	5	5
2	1725	24	1	58	1.62	22.1003	2	1	0	2	1	7	4	4	5	9	6	6	4	7	4	5	5	6	4	3	2	3	3	3	6	3	7
2	1727	20	1	50	1.59	19.7777	2	2	1	3	1	7	5	5	4	1	5	4	4	7	1	6	5	6	4	3	2	1	1	1	6	2	5
2	1728	20	1	46	1.54	19.3962	2	3	1	2	1	2	2	5	2	1	6	2	5	1	3	6	5	5	5	3	1	1	5	4	6	2	6
2	1729	19	1	47.8	1.7	16.5398	1	3	0	3	1	4	6	7	5	2	7	8	5	2	3	6	5	5	5	8	4	3	5	3	7	5	5
2	1731	19	1	50	1.68	17.7154	1	2	1	2	1	4	4	7	4	4	6	4	5	4	2	7	5	5	5	2	2	1	5	5	5	5	5
2	1732	22	1	63	1.65	23.1405	2	2	1	2	1	2	5	6	1	5	7	1	9	1	5	3	8	1	6	7	7	9	5	9	5	7	5
2	1733	22	1	73	1.59	28.8754	3	1	1	3	1	3	9	9	9	9	9	9	9	3	9	9	9	9	9	9	9	2	9	9	9	9	9
2	1734	19	1	54	1.67	19.3625	2	3	1	1	1	1	5	5	5	1	7	1	5	1	5	6	6	1	6	1	5	5	5	5	6	5	6
2	1735	21	1	54	1.66	19.5965	2	3	1	3	1	7	7	5	5	8	7	6	4	6	4	5	5	6	6	4	5	3	6	5	4	4	6
2	1736	18	1	54	1.7	18.6851	2	2	0	2	1	5	3	5	5	1	5	5	5	5	2	5	5	5	5	3	2	3	5	1	5	5	5
2	1737	19	1	45.5	1.58	18.2262	1	1	1	3	1	6	4	5	4	1	5	5	5	6	5	5	5	6	5	4	3	4	5	5	5	5	5
2	1738	20	1	68	1.63	25.5937	3	2	1	3	1	9	9	5	3	5	5	5	5	9	5	5	5	1	5	5	5	5	5	7	7	5	5
2	1739	19	1	64.5	1.63	24.2764	2	2	1	3	1	1	1	5	1	1	5	5	7	1	1	5	5	1	5	1	1	1	5	1	5	5	5
2	1740	20	1	51	1.64	18.9619	2	2	1	1	1	4	2	5	1	4	5	5	3	3	4	6	4	3	5	2	2	1	6	5	6	5	5
2	1741	21	0	75	1.85	21.9138	2	3	1	1	1	6	6	5	5	4	6	6	5	6	6	5	5	6	5	6	5	4	6	4	5	4	6
2	1743	19	0	61	1.73	20.3816	2	2	0	2	1	1	5	5	3	4	6	4	5	1	5	6	6	4	5	5	5	4	5	3	5	5	5
2	1744	22	1	55	1.63	20.7008	2	2	1	3	1	7	6	3	5	9	2	6	5	3	5	6	5	7	3	6	7	3	6	2	3	6	3
2	1745	20	1	48	1.56	19.7239	2	1	1	2	0	6	5	5	5	6	6	4	3	3	4	5	5	5	5	5	4	4	5	5	4	5	5
2	1747	20	1					2	0	3	1	2	8	5	8	3	5	7	5	1	1	5	5	5	5	3	1	1	5	1	5	2	5
2	1748	20	1	56	1.6	21.875	2	2	1	2	1	4	6	5	6	7	5	8	7	9	6	5	5	6	5	6	5	6	5	5	5	4	5
2	1749	22	1	67	1.74	22.1297	2	3	1	2	1	3	7	5	3	9	5	9	7	2	7	5	7	5	5	9	3	5	5	5	3	7	5
2	1751	19	1	49	1.6	19.1406	2	2	0	1	1	7	6	8	8	8	5	4	4	6	4	4	7	6	8	4	3	2	6	8	6	4	7
2	1753	22	1	67	1.66	24.3141	2	3	0	3	1	4	4	5	5	7	5	7	7	7	5	4	5	4	6	6	3	3	4	2	5	5	5
2	1754	21	1	49	1.64	18.2183	1	2	1	3	1	4	7	5	5	8	7	8	8	4	3	5	5	7	5	6	4	3	5	3	5	5	6
2	1755	19	1	59	1.66	21.4109	2	1	1	1	1	4	5	5	5	7	5	5	4	6	3	5	5	6	5	3	4	3	5	5	5	4	5
2	1756	18	1	60	1.7	20.7612	2	3	1	3	1	3	5	5	5	7	5	6	4	3	5	5	5	6	5	6	4	4	5	5	5	4	5
2	1757	21	1	75	1.73	25.0593	3	2	1	3	1	5	5	5	5	8	5	6	5	5	5	5	5	6	5	6	5	5	5	5	5	5	5
2	1758	22	1	43	1.6	16.7969	1	2	1	1	1	1	1	5	1	1	5	1	1	1	1	5	5	5	5	1	1	1	5	3	5	2	5
2	1759	24	1	65	1.63	24.4646	2	2	1	3	1	8	7	6	6	9	7	7	5	6	5	3	3	9	7	9	9	5	5	5	5	4	8
2	1761	20	1	62	1.62	23.6244	2	2	1	1	1	3	1	7	6	8	8	3	8	2	5	4	6	5	7	8	6	7	5	7	4	6	5
2	1762	21	0	81	1.87	23.1634	2	3	1	3	1	9	9	5	8	9	6	8	5	9	5	6	6	4	7	6	3	4	5	8	4	7	7
2	1763	21	2	52	1.59	20.5688	2	2	1	3	1	5	6	4	5	7	5	3	6	5	9	3	6	2	3	5	3	1	5	5	5	5	5
2	1764	20	1	57	1.6	22.2656	2	1	1	1	1	1	1	5	3	1	7	5	2	1	5	6	6	3	7	6	6	7	5	5	6	3	7
2	1765	22	1	55	1.5	24.4444	2	2	1	1	1	3	3	5	1	1	6	4	1	1	1	5	7	5	4	1	1	1	4	5	4	1	6
2	1766	21	1	51	1.66	18.5078	2	1	1	3	1	1	1	7	9	9	5	2	1	1	5	5	8	3	5	5	1	1	5	2	5	3	5
2	1768	21	1	58	1.73	19.3792	2	2	1	1	1	7	1	6	2	6	7	3	1	1	3	5	5	4	5	5	2	3	6	2	3	2	5
2	1770	18	1	42	1.58	16.8242	1	1	1	3	1	5	9	5	9	9	5	9	4	9	5	5	5	9	5	9	9	5	5	9	5	9	5
2	1771	22	1	50	1.53	21.3593	2	2	0	2	0	7	5	5	5	3	5	5	4	7	1	6	6	5	5	1	2	2	5	2	5	3	5
2	1772	21	1	68	1.58	27.2392	3	2	1	3	1	7	5	3	4	9	5	7	9	7	7	1	6	5	4	9	7	9	5	1	4	9	7
2	1773	18	1	52	1.65	19.1001	2	1	1	1	1	2	3	5	2	2	5	5	5	1	5	7	6	7	6	2	1	1	6	1	6	2	6
2	1774	21	1	62	1.63	23.3355	2	2	1	2	1	6	6	5	4	8	6	5	5	6	4	5	5	5	5	4	4	4	6	4	5	4	5
2	1775	19	1	52	1.52	22.5069	2	2	1	3	1	8	5	2	5	9	2	1	7	7	5	5	5	7	5	6	6	7	1	9	1	8	3
2	1776	19	1	55	1.65	20.202	2	2	1	1	1	1	5	5	5	2	5	3	1	1	1	6	5	4	3	1	3	1	5	1	5	1	5
2	1777	21	1	62	1.69	21.7079	2	3	1	3	1	5	5	3	6	8	6	7	8	8	2	8	5	7	5	3	5	3	7	2	3	2	8
2	1778	22	1	49	1.62	18.6709	2	2	0	3	1	2	2	8	7	9	7	2	3	1	2	8	8	5	7	5	2	2	5	1	5	5	8
2	1780	20	1	59	1.75	19.2653	2	3	1	1	1	3	4	5	5	6	5	3	1	2	5	5	7	1	5	4	3	3	3	5	4	2	5
2	1782	22	1	60	1.6	23.4375	2	2	0	2	1	6	5	3	5	6	5	5	5	5	1	5	5	7	5	5	1	5	5	5	5	5	5
2	1783	20	1	59	1.61	22.7615	2	2	1	3	1	7	6	5	4	2	6	8	5	7	1	5	5	4	3	3	2	3	3	1	3	3	7
2	1784	19	1	56	1.68	19.8413	2	1	1	3	1	9	9	5	7	6	5	8	9	7	2	3	5	9	2	2	1	1	4	1	8	2	7
2	1785	22	1	61	1.75	19.9184	2	2	1	3	1	3	3	3	3	5	3	3	1	3	5	4	6	2	6	2	1	1	6	1	3	1	5
2	1786	20	1	68	1.65	24.977	2	1	0	2	0	4	2	7	6	8	6	3	5	2	7	5	5	9	5	5	2	1	5	2	7	2	7
2	1787	20	1	53	1.62	20.1951	2	2	1	1	1	3	1	5	4	8	6	4	5	3	4	5	6	4	6	3	1	4	5	4	5	5	5
2	1788	21	1	62	1.63	23.3355	2	2	1	2	1	6	6	5	4	8	6	5	5	6	4	5	5	5	5	4	4	4	6	4	5	4	5
2	1789	19	1	55	1.65	20.202	2	2	1	1	1	1	5	5	5	2	5	3	1	1	1	6	5	4	3	1	3	1	5	1	5	1	5
2	1793	23	1	43	1.65	15.7943	1	2	1	1	1	1	1	9	5	1	9	5	5	1	5	9	9	5	5	1	1	1	5	1	8	1	8
2	1795	20	1	50	1.6	19.5312	2	1	1	2	1	3	5	5	6	9	5	4	5	7	5	6	5	8	5	8	5	3	1	7	6	7	6
2	1796	22	1	61	1.75	19.9184	2	2	1	3	1	3	3	3	3	5	3	3	1	3	5	4	6	2	6	2	1	1	6	1	3	1	5
2	1797	21	1	67	1.6	26.1719	3	3	1	3	1	6	5	4	7	9	6	7	3	6	3	4	6	8	5	7	9	4	3	7	5	6	5
2	1798	23	1	55	1.6	21.4844	2	2	0	2	1	3	3	5	4	6	5	4	3	3	3	5	5	6	5	3	3	3	4	4	5	4	5
2	1799	21	0	65	1.76	20.984	2	2	1	2	1	4	5	5	5	6	6	4	6	4	3	5	5	4	6	4	4	1	6	3	6	5	6
2	1801	19	1	70	1.65	25.7117	3	2	1	3	1	7	2	5	2	9	6	7	2	1	4	5	6	6	5	7	8	3	7	8	5	7	7
2	1802	23	1	82	1.75	26.7755	3	3	1	3	1	9	9	1	9	9	1	9	9	9	5	1	1	9	1	9	5	5	9	1	1	1	1
2	1803	23	1	82	1.75	26.7755	3	3	1	3	1	9	9	1	9	9	1	9	9	9	5	1	1	9	1	9	5	5	9	1	1	1	1
2	1804	23	1	55	1.53	23.4952	2	3	0	3	1	1	5	5	1	1	5	5	3	2	1	5	5	3	5	3	1	5	6	1	6	5	5
2	1805	21	1	69	1.65	25.3444	3	1	1	1	1	7	7	5	7	9	5	8	7	9	5	5	5	4	5	8	3	3	5	9	5	5	5
2	1807	20	1	69	1.69	24.1588	2	1	1	3	1	7	7	5	3	3	6	7	5	7	4	5	6	7	5	7	3	1	5	5	5	4	7
2	1808	19	1	63	1.57	25.5588	3	2	1	3	1	7	5	3	3	9	5	9	7	7	6	1	3	3	3	9	9	9	5	9	5	2	5
2	1809	21	1	64	1.68	22.6757	2	2	1	3	1	8	3	5	3	7	6	3	3	7	2	3	5	3	5	3	3	7	4	3	5	5	5
2	1810	21	1	67	1.61	25.8478	3	1	1	3	1	9	9	5	9	9	3	9	9	9	2	5	5	9	5	1	9	1	1	9	1	5	5
2	1811	20	0	65	1.7	22.4913	2	3	1	1	1	5	5	5	3	7	3	1	1	8	5	5	5	3	5	1	5	5	5	1	2	5	5
2	1812	23	1	62	1.67	22.231	2	1	1	2	1	7	2	5	1	9	6	9	5	6	2	2	2	9	5	3	2	1	7	7	8	9	7
2	1813	18	1	42	1.58	16.8242	1	1	1	3	1	5	9	5	9	9	5	9	4	9	5	5	5	9	5	9	9	5	5	9	5	9	5
2	1815	18	1	50	1.6	19.5312	2	1	1	3	1	5	7	6	4	9	5	7	6	2	5	4	1	9	2	1	1	1	6	1	6	1	7
2	1816	22	0	98	1.91	26.8633	3	2	1	1	1	7	7	4	8	9	3	9	9	9	6	4	5	9	5	9	5	1	3	9	7	6	5
2	1817	20	1	56.5	1.55	23.5172	2	2	0	2	1	3	5	5	3	8	5	5	5	3	5	5	5	5	5	5	2	2	5	5	4	5	5
2	1819	19	1	53	1.59	20.9644	2	3	1	3	1	5	9	5	8	8	7	5	9	5	5	3	5	6	5	5	5	5	5	1	5	5	5
2	1820	20	1	54	1.64	20.0773	2	2	1	3	1	1	5	7	5	6	9	5	5	1	3	8	9	4	9	5	4	2	7	1	9	3	7
2	1822	18	1	63	1.7	21.7993	2	2	1	3	1	9	9	5	4	9	5	9	9	9	1	7	7	7	8	8	1	1	3	7	5	1	7
2	1823	24	1	70	1.75	22.8571	2	1	1	2	1	5	7	5	5	3	5	7	7	4	5	5	5	5	6	2	5	5	5	5	5	7	6
2	1825	23	1	48.5	1.66	17.6005	1	1	1	1	1	3	3	5	4	7	5	4	5	2	4	7	7	6	5	4	4	3	6	4	5	4	6
2	1827	21	1	59	1.67	21.1553	2	2	1	3	1	6	4	3	1	9	6	9	9	7	4	1	6	7	4	1	1	1	1	1	8	1	9
2	1828	20	1	69	1.64	25.6544	3	3	1	3	1	6	4	6	5	3	6	4	5	2	5	5	5	5	7	4	4	2	2	5	6	4	7
2	1832	23	1	62	1.7	21.4533	2	2	1	3	1	8	8	6	8	8	7	8	5	8	3	5	5	8	6	8	2	1	5	8	2	4	5
2	1836	24	1	56	1.72	18.9292	2	1	1	3	1	1	4	5	2	1	6	6	6	1	3	5	5	6	5	1	1	2	4	5	5	3	6
2	1837	20	0	125	1.9	34.626	4	3	1	3	1	8	7	5	5	5	5	6	3	3	5	5	5	5	5	5	6	5	7	5	5	5	5
2	1839	21	1	48	1.62	18.2899	1	2	1	3	1	5	5	5	6	7	7	6	5	7	5	5	5	8	5	5	6	7	5	5	5	6	5
2	1841	19	1	57	1.68	20.1956	2	3	1	2	1	5	5	5	5	7	6	5	5	4	5	6	5	6	5	7	5	3	5	5	6	4	5
2	1843	24	1	68	1.58	27.2392	3	3	1	1	1	1	1	6	5	1	8	5	5	1	1	7	8	5	6	1	5	1	5	5	7	5	7
2	1844	23	1	115	1.58	46.0663	4	2	1	3	1	9	9	5	9	6	9	9	1	9	1	5	5	7	5	9	9	1	1	9	4	9	7
2	1849	20	1	58	1.64	21.5645	2	2	1	1	1	7	3	5	3	8	5	6	3	7	3	5	5	5	5	3	3	1	5	6	5	5	5
2	1850	22	1	61	1.65	22.4059	2	2	1	3	1	3	1	5	3	1	6	3	5	1	1	6	6	5	6	1	2	3	5	1	5	3	5
2	1852	23	1	64	1.59	25.3155	3	2	1	3	1	7	5	4	5	8	4	7	6	7	4	5	5	6	5	7	6	5	5	5	5	5	6
2	1855	24	1	61	1.7	21.1073	2	2	1	1	1	7	7	5	7	7	5	6	4	7	5	5	5	7	5	6	6	8	5	5	5	7	6
2	1856	22	1	70	1.61	27.0051	3	2	1	3	1	9	9	5	9	9	5	9	9	9	9	4	4	9	5	9	9	9	6	7	5	7	5
2	1858	22	1	56.5	1.52	24.4546	2	2	1	1	1	7	5	5	5	7	4	6	3	7	5	5	5	7	5	8	3	2	5	8	3	5	5
2	1863	22	0	65	1.7	22.4913	2	3	1	1	0	5	5	5	5	4	6	5	4	3	6	7	7	3	6	5	5	5	5	5	3	5	7
2	1867	23	0	76	1.76	24.5351	2	2	1	2	1	6	5	5	5	6	5	5	6	4	5	5	5	6	5	5	5	5	5	5	3	5	4
2	1873	22	1	76	1.67	27.2509	3	2	1	2	1	1	1	5	1	8	7	1	2	1	1	6	5	6	5	7	8	7	6	1	9	5	7
2	1874	20	1	72	1.69	25.2092	3	1	1	3	1	8	4	5	3	6	5	6	7	4	1	3	5	7	2	1	1	1	1	3	1	1	1
2	1876	23	1	62	1.61	23.9188	2	1	1	2	1	5	5	5	3	6	5	4	2	2	4	5	6	4	5	3	3	3	4	4	6	3	5
2	1877	18	1	53	1.61	20.4467	2	3	1	1	1	7	3	6	4	7	8	5	4	5	3	6	5	5	7	6	6	4	5	5	4	5	5
2	1879	20	0	64	1.8	19.7531	2	3	0	2	1	3	3	6	3	1	7	8	3	5	2	8	7	4	6	2	2	2	5	2	5	3	6
2	1880	22	1	58	1.61	22.3757	2	3	1	3	1	9	9	5	9	9	5	9	9	9	5	5	5	9	6	9	7	5	5	9	4	7	9
2	1881	19	1	58	1.57	23.5304	2	3	1	3	0	3	7	6	5	6	7	4	4	5	5	6	5	7	6	4	4	4	5	3	7	4	6
2	1883	21	1	52	1.58	20.83	2	3	1	2	1	6	4	5	4	2	5	7	5	4	3	5	5	5	6	5	5	2	5	5	5	5	5
2	1884	19	0	68	1.8	20.9877	2	2	1	3	1	5	5	5	5	5	5	5	5	5	5	6	5	5	5	1	5	3	5	5	5	5	4
2	1885	19	0	77	1.78	24.3025	2	2	0	2	1	6	5	5	5	6	5	5	5	6	5	5	5	5	5	5	5	3	5	5	5	5	5
2	1886	21	1	60	1.55	24.974	2	2	1	3	1	7	8	5	8	9	5	9	7	5	5	6	5	5	6	7	8	5	5	1	5	5	5
2	1887	19	0	51	1.69	17.8565	1	3	1	3	1	3	7	5	5	6	5	5	5	3	4	7	5	5	5	4	3	2	2	9	5	5	5
2	1889	21	1	52	1.58	20.83	2	3	1	2	1	6	4	5	4	2	5	7	5	4	3	5	5	5	6	5	5	2	5	5	5	5	5
2	1890	23	1	57	1.69	19.9573	2	3	1	1	1	1	4	5	3	6	5	5	2	1	5	5	5	3	5	6	2	1	3	1	5	4	5
2	1892	23	1	80	1.65	29.3848	3	1	1	3	1	9	7	5	9	9	5	9	2	6	1	9	5	5	5	9	7	2	5	5	1	5	5
2	1894	23	1	60	1.63	22.5827	2	2	1	3	1	1	5	5	6	6	6	1	1	1	5	5	5	7	6	6	2	1	8	1	5	1	5
2	1904	23	1	47	1.54	19.8178	2	1	1	1	1	1	2	8	1	5	9	3	9	4	1	5	5	1	5	1	1	1	1	1	7	1	7
2	1906	24	1	95	1.69	33.2621	4	1	1	3	1	7	7	2	8	9	5	8	5	8	5	3	5	5	5	9	5	6	7	3	5	7	5
2	1907	22	0	74	1.6	28.9062	3	2	1	1	1	2	1	6	1	1	8	2	5	2	2	8	5	5	5	7	6	3	4	7	2	4	5
2	1915	18	1	80	1.67	28.6851	3	2	1	3	1	1	9	5	9	9	5	9	9	9	9	5	5	9	5	1	1	1	9	1	5	1	5
3	1	31	1	88.5	1.63	33.3095	4	2	1	3	1	6	6	5	6	7	5	6	4	6	5	4	5	6	5	6	6	5	4	6	3	5	4
3	2	26	0	75	1.82	22.6422	2	3	1	2	1	4	5	5	5	6	5	4	5	4	5	5	5	5	5	5	5	5	5	4	5	5	5
3	7	26	1	59	1.7	20.4152	2	1	1	3	1	1	4	7	4	3	7	4	3	4	3	7	7	3	8	3	2	2	8	2	5	3	8
3	9	26	1	52	1.65	19.1001	2	1	1	2	1	5	5	5	5	5	5	5	5	5	5	5	5	4	5	5	5	5	5	5	4	4	5
3	11	30	1	95	1.72	32.112	4	2	1	1	1	8	8	1	6	7	1	7	1	7	1	5	5	5	3	7	2	2	5	7	3	5	5
3	14	30	0	85	1.78	26.8274	3	2	1	3	1	4	1	5	1	6	8	5	3	5	5	6	7	5	6	5	3	1	5	5	8	4	8
3	17	27	0	87	1.74	28.7356	3	3	1	3	1	6	6	6	6	6	7	5	5	6	4	9	7	9	6	7	7	5	9	3	5	5	5
3	18	26	1	59	1.7	20.4152	2	1	1	3	1	1	4	7	4	3	7	4	3	4	3	7	7	3	8	3	2	2	8	2	5	3	8
3	21	26	1	68	1.59	26.8977	3	1	1	3	1	1	1	2	1	6	5	1	5	2	1	6	6	5	5	1	1	1	5	1	6	5	5
3	36	35	0	80	1.8	24.6914	2	2	1	1	1	6	6	5	6	9	4	5	7	7	6	3	4	4	4	3	3	3	6	3	6	3	6
3	37	25	0	71	1.76	22.921	2	1	1	3	0	5	5	5	5	5	5	5	5	5	5	5	5	5	5	5	5	5	5	5	2	5	5
3	39	35	1	90	1.7	31.1419	4	2	1	1	1	7	6	5	5	6	5	6	5	6	5	5	5	7	5	6	6	6	5	6	5	6	5
3	40	28	0	85	1.79	26.5285	3	2	0	2	0	1	2	8	2	6	8	2	5	2	2	6	8	2	8	3	5	3	3	3	3	5	5
3	45	25	0	65	1.8	20.0617	2	2	1	2	1	2	3	5	6	7	6	3	3	3	5	6	5	2	7	3	5	2	3	5	6	2	8
3	46	31	1	90	1.72	30.4218	4	1	1	3	1	9	9	5	8	9	5	3	2	4	4	8	8	5	7	8	3	3	5	8	5	3	5
3	55	25	0	89	1.8	27.4691	3	2	1	3	0	7	5	5	5	5	5	5	5	5	5	6	5	7	5	5	5	5	5	5	5	5	5
3	61	35	1	71	1.6	27.7344	3	3	1	2	1	3	2	5	5	7	5	7	5	2	5	7	5	5	5	3	3	5	5	3	7	5	5
3	62	25	1	52	1.6	20.3125	2	2	1	1	1	3	5	5	5	6	5	5	4	3	5	5	5	5	5	4	4	5	5	5	6	4	5
3	66	26	1	51	1.56	20.9566	2	2	1	3	1	5	7	5	5	9	6	9	3	4	5	5	5	5	6	4	3	5	5	2	5	7	6
3	70	27	1	68	1.73	22.7204	2	2	1	3	1	2	2	5	5	8	5	3	3	3	3	5	7	3	6	5	3	2	5	3	7	3	5
3	72	30	1	72	1.65	26.4463	3	1	1	3	1	6	4	5	6	8	5	7	7	3	4	5	5	4	5	4	4	2	3	8	4	4	5
3	74	29	1	89	1.56	36.5713	4	2	1	3	1	9	9	6	9	9	9	5	5	9	5	7	5	9	5	1	9	5	5	9	1	9	7
3	79	32	1	50	1.65	18.3655	1	3	1	1	1	3	4	5	4	3	6	5	5	3	5	5	6	5	5	4	5	1	4	3	5	4	5
3	81	27	1	45	1.54	18.9745	2	2	1	2	1	7	7	2	5	8	6	8	5	7	3	5	6	3	6	4	5	2	5	5	5	5	5
3	84	29	0	56	1.65	20.5693	2	2	0	2	0	5	5	5	5	5	5	5	7	5	5	5	5	5	5	5	5	5	5	5	5	5	5
3	87	25	1	53.8	1.54	22.6851	2	3	1	3	1	4	6	5	6	8	5	5	4	6	5	5	5	5	4	3	4	4	5	7	5	5	7
3	98	28	0	71	1.8	21.9136	2	2	0	2	1	5	5	6	5	6	6	5	6	5	5	6	5	5	6	3	4	4	4	4	6	5	6
3	99	28	0	71	1.8	21.9136	2	2	0	2	1	5	5	6	5	6	6	5	6	5	5	6	5	5	6	3	4	4	4	4	6	5	6
3	100	28	0	75	1.83	22.3954	2	1	0	2	1	4	4	7	6	8	8	5	5	3	5	5	5	4	7	5	4	5	6	5	5	3	5
3	101	29	1	98	1.57	39.7582	4	1	0	2	1	5	5	3	2	8	3	2	1	1	1	3	3	2	4	1	1	1	1	1	1	1	2
3	103	27	0	125	1.68	44.2885	4	1	1	3	1	5	6	5	7	8	5	7	5	5	5	5	5	5	7	8	5	9	5	4	5	4	5
3	110	26	0	62	1.77	19.79	2	2	0	2	0	5	5	5	5	5	5	5	5	5	5	5	5	5	5	5	5	5	5	5	5	5	5
3	113	26	0	100	1.75	32.6531	4	2	0	2	1	3	3	5	2	3	7	3	5	2	2	5	5	5	5	2	1	2	2	2	5	3	5
3	114	26	1	55	1.66	19.9594	2	2	1	2	1	3	3	5	5	4	5	4	5	4	5	5	5	5	5	4	4	4	5	5	4	5	5
3	115	29	0	83	1.72	28.0557	3	3	1	3	1	5	7	5	5	6	5	6	4	4	5	5	5	5	5	5	3	3	3	3	5	4	6
3	120	27	1	65	1.6	25.3906	3	2	1	3	1	8	8	5	8	8	8	8	8	8	5	5	5	5	8	8	5	2	5	4	4	5	5
3	121	25	0	85	1.82	25.6612	3	2	1	3	1	5	5	1	1	6	5	1	1	1	1	1	1	5	1	1	1	1	5	1	6	1	5
3	125	34	1	57	1.71	19.4932	2	2	0	2	1	5	5	5	5	5	5	5	5	5	5	5	5	5	5	3	3	3	3	3	3	5	5
3	126	25	1	70	1.57	28.3987	3	1	1	3	1	6	5	5	5	6	5	6	6	6	5	4	5	5	5	3	2	1	5	8	5	7	5
3	127	25	1	70	1.57	28.3987	3	1	1	3	1	6	5	5	5	6	5	6	6	6	5	4	5	5	5	3	2	1	5	8	5	7	5
3	128	35	1	79	1.65	29.0174	3	2	1	3	1	6	7	5	6	8	5	7	7	5	5	4	6	5	6	7	7	7	5	2	5	8	5
3	134	30	1	57	1.72	19.2672	2	2	1	3	1	7	7	5	7	9	5	5	5	7	5	5	5	4	5	1	1	1	5	3	5	1	9
3	135	32	1	64	1.65	23.5078	2	1	0	2	1	7	5	4	5	7	5	6	3	4	3	5	5	6	5	2	2	4	4	7	4	4	6
3	138	31	0	66	1.7	22.8374	2	2	1	3	1	8	8	5	9	6	6	2	3	6	5	5	5	5	7	2	1	3	8	3	7	2	8
3	141	33	1	62	1.74	20.4783	2	2	1	2	1	1	1	6	1	1	6	1	1	1	1	5	6	5	6	1	1	1	8	1	6	1	7
3	144	26	1	62	1.68	21.9671	2	2	0	2	1	3	3	7	3	6	8	2	5	2	2	2	7	2	7	5	5	3	4	3	7	3	5
3	149	34	1	82	1.63	30.863	4	2	1	3	1	7	7	5	4	9	5	4	5	8	5	7	5	5	6	8	2	3	5	3	5	5	5
3	167	25	1	90	1.6	35.1562	4	2	1	1	1	2	6	9	6	1	9	2	2	1	5	7	8	2	8	3	2	2	1	9	7	1	9
3	173	34	1	57	1.66	20.6852	2	2	1	2	1	2	3	5	3	7	6	7	6	3	5	5	5	6	5	5	3	2	5	3	5	2	6
3	183	33	1		1.73			1	1	1	1	3	7	5	6	6	5	8	6	5	6	4	1	1	3	7	7	3	5	7	5	7	7
3	185	32	1	52	1.69	18.2066	1	3	0	2	1	7	5	5	5	9	3	7	7	8	7	1	5	7	4	5	3	3	1	1	1	5	7
3	189	28	1	60	1.69	21.0077	2	2	0	1	1	7	7	5	7	9	5	8	7	7	6	3	5	2	2	8	5	5	5	5	6	6	5
3	191	25	1	67	1.71	22.913	2	3	1	3	1	7	5	5	6	7	7	6	3	4	5	5	5	4	5	3	4	3	7	4	5	4	6
3	193	28	0	75	1.73	25.0593	3	2	1	1	1	2	2	5	6	8	5	4	4	2	3	5	5	5	5	3	6	2	5	3	5	4	6
3	194	31	1	80	1.65	29.3848	3	2	1	1	1	9	7	2	5	9	5	7	5	9	6	3	5	2	5	9	7	5	7	5	5	7	5
3	195	32	0	62	1.71	21.2031	2	2	1	3	1	3	5	5	5	3	7	4	3	4	5	5	5	5	6	4	4	3	7	5	5	4	5
3	197	25	0	62	1.74	20.4783	2	2	1	2	0	4	5	5	5	5	5	5	4	4	5	6	5	6	5	4	5	5	6	5	5	4	5
3	199	26	1	54	1.62	20.5761	2	3	0	2	0	1	1	5	3	1	6	4	5	1	5	7	7	5	5	1	1	1	5	1	5	2	6
3	200	29	0	86	1.86	24.8584	2	3	1	1	1	1	1	7	1	5	8	5	9	1	1	5	5	9	5	5	5	1	5	5	5	1	5
3	201	26	1	83	1.69	29.0606	3	2	1	2	1	8	8	7	5	7	7	9	2	8	2	5	5	2	8	2	2	1	5	1	5	8	5
3	202	27	1	77	1.61	29.7056	3	1	0	2	0	7	7	5	3	9	7	7	6	7	1	7	5	4	5	6	1	1	5	5	5	3	5
3	203	31	1	51	1.58	20.4294	2	2	1	2	1	3	4	5	4	6	5	4	5	1	2	5	5	5	5	3	2	1	5	1	4	4	5
3	204	26	1	83	1.69	29.0606	3	2	1	2	1	8	8	7	5	7	7	9	2	8	2	5	5	2	8	2	2	1	5	1	5	8	5
3	205	26	1	83	1.69	29.0606	3	2	1	2	1	8	8	7	5	7	7	9	2	8	2	5	5	2	8	2	2	1	5	1	5	8	5
3	206	26	1	83	1.69	29.0606	3	2	1	2	1	8	8	7	5	7	7	9	2	8	2	5	5	2	8	2	2	1	5	1	5	8	5
3	207	25	1	50	1.59	19.7777	2	1	1	3	1	9	9	5	8	6	5	8	6	8	6	5	5	4	5	2	5	1	6	5	3	7	2
3	208	26	1	85	1.52	36.7902	4	1	1	3	1	5	5	5	5	7	5	5	4	5	5	5	5	5	5	5	5	5	5	5	5	5	6
3	209	27	1	55	1.63	20.7008	2	3	1	3	1	2	5	5	5	8	5	8	8	3	5	5	5	3	5	8	7	2	5	7	5	3	5
3	210	31	1	53	1.63	19.9481	2	3	1	1	1	1	1	5	5	9	5	8	3	1	5	5	5	5	5	5	5	1	5	1	5	7	5
3	211	26	1	83	1.69	29.0606	3	2	1	2	1	8	8	7	5	7	7	9	2	8	2	5	5	2	8	2	2	1	5	1	5	8	5
3	212	29	0	68	1.7	23.5294	2	2	1	3	1	8	6	4	2	8	6	6	3	3	2	5	4	3	5	5	5	1	9	5	5	1	7
3	213	28	0	70	1.78	22.0932	2	2	1	3	1	7	7	7	4	6	7	6	7	6	5	6	6	7	6	6	5	5	5	4	6	5	6
3	214	26	1	62	1.6	24.2187	2	3	0	2	1	8	5	5	7	9	6	9	5	4	3	7	5	4	6	4	4	4	5	7	4	7	5
3	216	25	0	70	1.8	21.6049	2	1	0	3	0	5	5	5	5	5	5	5	7	5	5	5	5	5	5	5	6	3	5	5	6	5	5
3	217	25	1	100	1.71	34.1986	4	2	1	3	1	9	9	5	7	9	6	9	9	9	1	5	5	8	5	4	5	3	9	9	8	5	5
3	221	35	1	86	1.75	28.0816	3	2	1	3	1	7	7	4	4	9	7	7	9	9	8	4	5	5	5	7	9	8	5	7	8	9	6
3	222	33	0	98	1.78	30.9304	4	2	0	2	0	5	5	5	5	5	5	5	5	5	5	5	5	5	5	5	5	5	5	1	5	5	5
3	223	31	1	44	1.49	19.8189	2	2	1	2	1	2	2	7	5	2	6	7	7	2	2	5	5	5	5	2	2	2	4	4	6	2	7
3	227	27	0	87	1.83	25.9787	3	2	1	3	1	3	3	5	5	7	5	3	5	3	5	5	5	5	5	3	1	3	5	5	7	4	5
3	228	33	1	106	1.6	41.4062	4	1	1	3	1	7	6	3	7	9	3	3	5	4	4	4	5	5	6	7	8	8	5	5	4	8	5
3	232	34	0	82	1.8	25.3086	3	2	0	1	1	4	3	8	3	4	7	4	3	3	4	6	5	3	6	6	7	4	7	6	5	8	6
3	233	26	1	54	1.67	19.3625	2	2	1	3	1	5	5	5	5	7	6	5	5	5	4	6	5	7	5	4	4	1	5	1	6	2	5
3	234	28	1	61	1.58	24.4352	2	3	1	3	1	9	9	5	7	9	8	4	6	8	3	7	5	9	5	7	7	9	9	9	9	9	7
3	235	26	0	73	1.74	24.1115	2	2	0	3	1	5	5	5	5	7	5	5	5	5	5	5	5	5	5	5	4	3	5	5	5	5	5
3	237	28	1	67	1.71	22.913	2	3	1	3	1	8	5	5	3	9	6	8	1	9	3	5	5	8	6	9	4	3	3	2	5	3	6
3	239	26	1	60.5	1.67	21.6931	2	1	1	1	1	5	5	5	1	1	5	6	6	1	5	5	5	5	5	1	1	1	9	1	5	5	5
3	240	25	1	52	1.53	22.2137	2	2	0	2	1	9	9	5	5	9	5	5	4	8	5	5	5	9	5	6	1	3	5	1	5	1	9
3	242	31	1	63	1.7	21.7993	2	2	1	3	1	6	3	5	3	6	6	6	6	6	5	6	6	3	5	5	3	3	5	4	5	5	6
3	243	30	1	112	1.7	38.7543	4	2	1	3	1	5	7	5	9	9	5	7	1	1	1	5	5	8	1	7	8	1	5	1	1	8	1
3	245	33	1	66	1.62	25.1486	3	2	1	3	1	7	5	5	5	8	5	7	6	6	5	5	5	3	5	6	5	3	3	2	5	5	5
3	246	29	1	56	1.7	19.3772	2	3	1	2	1	5	5	5	3	1	6	5	3	1	3	5	5	5	5	3	2	1	5	5	5	5	5
3	249	35	1	91	1.78	28.7211	3	2	1	3	1	7	7	5	8	9	7	6	5	5	5	6	6	5	7	4	7	2	7	9	5	6	8
3	251	30	1	95	1.59	37.5776	4	2	1	2	1	9	9	9	9	9	9	9	8	7	5	4	4	5	9	9	5	5	5	5	5	7	7
3	252	26	0	106	1.77	33.8345	4	2	1	3	1	4	6	5	5	3	5	5	5	5	5	6	5	4	4	3	5	5	5	5	5	5	5
3	254	27	1	64	1.7	22.1453	2	2	1	2	1	6	6	5	6	7	5	5	4	4	5	5	5	5	5	5	5	4	5	4	5	4	5
3	257	34	1	84	1.63	31.6158	4		1	3	1	9	7	5	9	9	9	9	5	5	9	5	5	4	5	9	5	5	5	5	1	9	9
3	258	28	0	90	1.87	25.7371	3	3	1	3	1	2	2	8	2	5	8	2	6	2	2	5	7	2	6	6	2	2	2	8	8	8	5
3	259	30	0	87	1.88	24.6152	2	2	1	3	1	4	4	6	5	3	7	4	5	4	3	6	5	6	6	3	3	2	6	6	6	3	6
3	260	30	1	76	1.74	25.1024	3	3	1	3	1	7	5	5	3	9	5	8	9	9	5	5	5	6	5	8	4	4	4	9	5	5	7
3	261	31	0	83	1.9	22.9917	2	2	0	2	1	3	4	7	5	1	8	2	4	2	3	7	8	3	6	2	1	1	7	2	7	4	7
3	262	33	1	58	1.7	20.0692	2	2	1	3	1	4	5	5	1	7	6	5	7	6	1	4	5	7	6	8	8	4	6	8	6	8	8
3	263	28	1	54	1.67	19.3625	2	1	1	1	1	3	3	7	1	1	8	1	1	1	3	8	7	5	6	1	1	1	8	3	7	2	7
3	264	31	1	72	1.8	22.2222	2	2	1	3	1	2	4	5	5	1	9	5	6	3	1	7	7	3	7	3	3	1	1	1	4	4	6
3	266	31	1	116	1.6	45.3125	4	3	1	3	1	9	9	5	9	9	5	9	9	9	9	6	5	9	6	9	9	9	5	9	5	9	6
3	267	35	1	112	1.6	43.75	4	2	1	2	1	5	5	5	6	9	5	9	5	5	5	5	5	5	5	5	9	5	5	9	4	9	5
3	269	30	1	62	1.7	21.4533	2	3	1	3	1	9	5	5	9	9	5	9	5	9	5	5	5	2	5	1	1	1	5	9	5	5	9
3	272	26	0	68	1.72	22.9854	2	1	0	2	1	7	7	3	2	8	3	7	7	5	2	2	9	7	5	5	3	5	8	5	5	5	5
3	273	26	1	62	1.77	19.79	2	2	1	3	1	9	5	5	5	7	5	5	3	7	5	5	5	5	5	7	5	5	5	5	7	5	5
3	277	31	0	83	1.9	22.9917	2	2	0	2	1	3	4	7	5	1	8	2	4	2	3	7	8	3	6	2	1	1	7	2	7	4	7
3	280	30	0	68	1.7	23.5294	2	2	1	2	1	7	7	5	5	9	5	5	4	6	5	6	5	7	5	4	5	3	5	7	6	5	5
3	283	26	1	125	1.77	39.8991	4	1	1	3	1	8	9	4	6	9	6	9	9	9	2	5	3	9	2	9	9	9	3	9	6	2	6
3	284	29	1	65	1.68	23.03	2	2	1	3	1	7	5	5	5	9	6	5	5	3	5	5	5	8	5	3	5	3	5	8	3	7	5
3	285	29	1	80	1.65	29.3848	3	1	1	1	1	7	5	5	5	8	6	8	6	8	5	6	6	4	5	6	2	2	5	2	6	5	5
3	286	28	1	80	1.65	29.3848	3	2	1	3	1	9	8	1	8	9	2	6	9	9	9	2	3	5	2	1	2	2	7	9	9	5	9
3	289	27	1	52	1.56	21.3675	2	3	1	1	1	7	7	7	7	8	7	7	7	7	7	6	6	7	6	6	6	5	5	4	6	4	6
3	293	32	1	51	1.6	19.9219	2	2	1	2	1	1	1	4	1	6	5	5	5	5	2	6	4	2	6	1	1	1	5	5	5	4	5
3	296	27	1	52	1.56	21.3675	2	3	1	1	1	7	7	7	7	8	7	7	7	7	7	6	6	7	6	6	6	5	5	4	6	4	6
3	299	33	1					2	1	3	1	9	5	5	7	9	5	9	3	7	2	4	4	6	7	9	8	1	3	9	3	4	5
3	301	26	1	72	1.76	23.2438	2	2	0	2	0	1	1	5	5	5	5	1	5	1	4	5	5	5	5	5	5	1	5	1	5	5	5
3	302	25	0	93	1.83	27.7703	3	2	1	3	1	7	5	5	5	8	6	6	4	6	4	5	5	4	5	2	4	4	4	5	7	5	6
3	305	31	0	70	1.72	23.6614	2	3	1	2	1	5	5	5	5	5	5	5	8	6	7	4	4	4	6	6	6	6	6	6	6	6	6
3	307	31	0	70	1.72	23.6614	2	3	1	2	1	6	6	4	5	7	5	6	6	5	8	4	3	5	5	4	7	4	4	5	7	4	6
3	311	30	1	64	1.65	23.5078	2	2	0	2	1	5	5	9	5	9	9	5	9	5	1	9	9	5	9	1	1	1	9	1	9	5	9
3	316	32	1	65	1.61	25.0762	3	2	1	2	1	7	7	5	5	7	5	4	5	4	5	5	5	6	5	4	4	4	5	3	5	4	5
3	318	26	1	43	1.64	15.9875	1	2	1	1	1	1	3	5	7	2	8	2	2	2	3	5	7	5	6	1	2	1	5	1	5	3	5
3	320	29	0	67	1.75	21.8776	2	3	0	2	1	4	5	6	5	6	5	5	4	4	3	6	5	4	5	4	4	3	5	5	5	4	5
3	331	29	1	58	1.6	22.6562	2	2	1	3	1	6	6	6	6	8	6	4	7	7	6	5	5	7	5	7	7	7	5	5	5	7	7
3	332	29	1	86	1.63	32.3685	4	3	0	2	1	9	9	5	9	9	6	9	6	9	5	5	5	9	5	9	9	6	4	4	3	5	5
3	334	25	1	75	1.66	27.2173	3	1	0	2	1	9	9	5	9	9	7	9	5	7	5	5	5	8	5	9	9	7	5	9	4	8	7
3	340	27	1	81	1.77	25.8546	3	2	0	2	1	4	8	5	7	5	5	8	8	4	5	5	5	5	7	7	5	5	5	3	3	5	7
3	343	29		62	1.64	23.0518	2	2	1	2	1	5	5	5	3	4	5	5	3	4	5	7	5	7	5	5	4	3	5	3	4	5	5
3	344	32	1	82	1.67	29.4023	3	3	1	3	0	5	5	5	5	7	5	6	4	6	3	5	5	5	5	2	1	3	5	6	5	4	5
3	358	34	1	50	1.52	21.6413	2	2	0	2	0	4	4	6	4	5	6	5	5	4	5	5	6	5	6	5	4	5	5	5	5	5	5
3	364	27	1	56.7	1.62	21.6049	2	1	1	3	1	4	7	5	7	9	5	3	3	2	5	6	5	4	5	7	4	5	5	6	6	3	6
3	365	26	1	52	1.62	19.8141	2	3	0	2	0	2	2	5	2	1	5	2	5	2	5	5	5	3	5	2	1	1	5	2	5	2	5
3	366	29	1	70	1.63	26.3465	3	2	1	3	1	1	5	5	1	9	5	1	5	9	1	5	5	9	5	1	1	1	5	1	5	1	5
3	367	27	1	125.5	1.63	47.2355	4	2	0	2	1	9	9	9	9	9	9	9	9	6	9	6	6	9	8	9	9	9	6	9	6	9	8
3	368	29	1	86	1.63	32.3685	4	3	0	2	1	9	9	5	9	9	6	9	6	9	5	5	5	9	5	9	9	6	4	4	3	5	5
3	369	27	1	57	1.7	19.7232	2	2	1	3	1	2	5	5	5	7	5	6	2	2	5	5	5	6	5	7	2	2	5	2	5	2	5
3	371	33	0	95	1.82	28.6801	3	3	1	3	1	7	7	5	6	5	9	7	9	5	5	7	5	2	5	5	9	7	5	5	7	5	6
3	373	28	0	92	1.9	25.4848	3	1	1	3	1	1	5	5	9	9	7	8	2	2	5	5	5	5	5	9	8	5	7	9	5	5	5
3	374	25	1	64	1.6	25	3	2	0	2	0	7	5	5	5	7	5	5	4	5	5	5	5	5	5	6	3	3	5	5	5	5	5
3	375	30	1	60	1.6	23.4375	2	3	1	3	1	1	1	5	5	1	5	1	5	1	5	6	6	5	6	1	5	5	5	1	6	2	7
3	376	27	1	56	1.67	20.0796	2		0	2	1	3	4	5	6	7	5	6	2	1	1	6	5	5	5	3	1	1	5	6	3	3	6
3	377	35	1	53	1.54	22.3478	2	2	0	2	1	3	3	5	2	5	5	5	5	5	5	5	5	3	5	4	1	1	5	3	5	5	5
3	378	27	1	46	1.6	17.9687	1	1	1	2	1	1	5	5	5	7	5	3	1	1	5	7	8	3	5	1	1	1	8	3	7	5	5
3	379	26	1	62	1.62	23.6244	2	2	1	1	1	9	6	6	2	9	5	9	1	1	7	6	5	7	5	9	5	3	3	7	5	8	6
3	380	29	1	65	1.67	23.3067	2	3	1	3	1	7	7	2	7	9	3	9	9	7	7	1	1	7	2	9	8	5	1	9	5	9	5
3	383	27	1	74	1.67	26.5338	3	2	1	3	1	1	1	7	7	9	5	3	4	6	1	7	8	7	6	3	1	1	9	1	8	1	8
3	386	35	1	68	1.64	25.2826	3	2	1	3	1	1	1	5	1	1	5	1	1	1	1	5	5	5	5	1	1	1	1	1	5	1	5
3	392	30	1	46	1.58	18.4265	1	2	1	2	1	1	1	5	1	1	3	2	5	1	1	9	5	5	3	1	1	1	1	1	5	1	5
3	393	35	0	82	1.75	26.7755	3	3	1	3	1	6	3	7	3	7	5	5	4	5	1	7	7	7	7	1	3	1	5	1	7	2	5
3	394	26	1	67	1.72	22.6474	2	3	1	1	1	8	3	8	4	4	8	3	5	2	2	6	7	4	7	3	3	1	5	1	4	3	7
3	395	34	1	94	1.7	32.526	4	2	1	2	1	9	5	5	5	9	5	5	3	9	3	3	3	3	3	9	9	5	5	9	3	9	5
3	396	31	1	54	1.56	22.1893	2	3	0	3	1	8	7	5	5	8	5	5	3	3	5	5	5	3	5	7	5	3	7	3	3	5	5
3	397	35	0	82	1.75	26.7755	3	3	1	3	1	6	3	7	3	7	5	5	4	5	1	7	7	7	7	1	3	1	5	1	7	2	5
3	398	25	1	73	1.71	24.9649	2	2	1	3	1	9	6	5	4	9	5	9	5	4	1	5	5	9	5	6	4	5	5	9	5	4	6
3	399	33	0	80	1.81	24.4193	2	3	0	2	1	8	8	5	5	9	5	9	5	5	5	5	5	5	5	7	5	5	5	5	5	5	5
3	401	27	1	66	1.63	24.841	2	1	1	3	1	5	7	1	5	9	4	7	9	7	5	9	3	9	3	9	5	9	1	1	1	9	9
3	402	25	1	75				2	1	3	1	4	6	5	3	6	5	6	3	4	4	4	5	6	5	4	5	6	5	5	5	6	4
3	403	28	0	80	1.85	23.3747	2	2	1	3	1	7	5	5	1	5	6	4	2	1	5	7	9	1	7	1	5	1	7	1	7	3	7
3	405	26	1	58	1.73	19.3792	2	3	0	3	0	4	6	7	2	4	5	3	6	5	3	6	5	1	5	5	5	3	5	5	5	5	7
3	406	32	0	85	1.73	28.4005	3	1	0	2	1	5	5	5	5	7	5	6	7	5	5	5	5	7	5	5	5	5	5	5	5	5	5
3	408	28	0	81	1.83	24.187	2	2	1	3	1	6	1	5	2	5	5	1	6	5	2	7	5	9	5	5	1	1	5	2	3	3	5
3	410	26	1	49	1.61	18.9036	2	2	1	3	1	5	5	5	5	6	5	5	6	5	5	5	5	7	5	5	5	5	6	3	5	5	5
3	411	34	0	97	1.83	28.9647	3	3	1	1	1	7	7	5	7	8	7	7	3	4	4	5	6	5	6	7	5	5	7	7	4	6	6
3	414	27	1	68	1.63	25.5937	3	2	1	3	1	8	8	5	3	9	7	8	4	9	3	6	4	9	5	6	2	2	4	4	7	2	7
3	415	25	1	53	1.62	20.1951	2	1	1	3	1	8	6	2	2	9	4	8	4	8	2	2	2	5	2	6	2	2	3	2	2	5	5
3	417	30	1	86	1.75	28.0816	3	2	1	3	1	7	5	5	6	9	5	5	3	6	5	5	5	3	5	1	5	5	5	5	5	5	5
3	418	26	1	60	1.55	24.974	2	3	1	3	1	9	5	5	5	7	6	5	6	9	1	5	5	9	5	1	9	1	3	9	5	5	5
3	421	28	0	80	1.6	31.25	4	2	1	3	1	7	7	6	7	7	6	7	8	7	5	6	5	7	6	7	6	5	5	5	6	4	6
3	422	28	0	130	1.87	37.1758	4	2	1	3	1	6	7	5	6	8	5	7	4	5	4	5	5	3	5	7	7	5	5	6	3	5	5
3	427	26	0	79	1.72	26.7036	3	2	0	2	1	3	5	4	7	9	4	7	5	3	7	5	6	7	5	8	4	3	7	7	6	6	5
3	429	28	0	68	1.71	23.255	2	1	1	1	0	5	5	5	5	5	7	5	5	5	5	6	5	5	5	5	5	5	5	5	5	2	7
3	433	27	0	80	1.65	29.3848	3	1	1	1	1	6	6	2	6	6	5	6	2	2	2	5	5	2	5	5	5	2	5	3	5	2	5
3	434	27	1	64	1.57	25.9645	3	2	1	2	1	7	7	7	7	9	8	6	5	2	5	5	5	7	5	7	7	7	5	3	5	5	7
3	435	26	0	70	1.7	24.2215	2	2	1	2	0	5	5	2	5	3	1	5	4	5	3	5	5	3	2	5	5	5	1	5	2	5	2
3	436	25	0	90	1.7	31.1419	4	2	0	2	1	7	5	5	6	3	6	3	3	3	3	5	5	2	5	3	3	3	6	3	6	3	5
3	437	28	0	98	1.71	33.5146	4	3	1	3	1	5	7	5	6	7	7	5	4	4	5	4	5	3	5	6	4	2	5	4	1	1	6
3	440	29	1	50	1.58	20.0288	2	3	1	3	1	6	6	6	4	2	5	3	4	6	3	6	5	5	5	1	2	2	5	5	5	5	5
3	442	27	0	63	1.75	20.5714	2	1	1	2	1	5	5	5	4	7	5	5	4	5	5	5	5	3	5	3	5	3	5	5	6	4	5
3	444	26	0	57.5	1.69	20.1323	2	1	1	1	0	5	5	5	5	5	5	5	5	5	5	5	6	4	5	6	6	5	5	5	6	5	5
3	457	34	0	110	1.75	35.9184	4	2	1	2	1	6	4	3	7	7	6	4	5	6	2	2	5	7	5	7	5	6	8	8	5	7	5
3	458	25	0	89	1.85	26.0044	3	1	1	3	1	7	6	5	5	7	5	7	4	7	5	5	5	7	6	5	5	5	5	5	6	6	5
3	459	25	0	88	1.8	27.1605	3	2	1	2	1	6	5	5	5	7	6	5	5	5	5	6	5	7	5	5	5	5	5	7	5	5	6
3	464	34	1	58.5	1.6	22.8516	2	3	1	1	1	4	4	5	6	6	5	6	7	4	6	5	5	5	5	5	5	4	6	3	5	5	5
3	465	26	1	95	1.65	34.8944	4	2	1	3	1	7	3	5	3	9	7	9	7	9	1	5	5	1	5	1	7	2	8	1	5	5	5
3	469	26	0	71	1.82	21.4346	2	3	1	3	1	6	6	5	5	4	7	3	4	3	5	5	5	4	6	3	4	4	5	5	4	5	7
3	471	27	0	68	1.7	23.5294	2	2	0	2	0	5	5	5	5	5	5	5	5	5	5	5	5	5	5	5	5	5	5	5	6	5	5
3	475	27	1	82	1.68	29.0533	3	1	1	3	1	9	5	5	5	9	7	9	5	7	6	5	5	7	5	3	7	2	3	7	6	9	5
3	476	27	0	73	1.78	23.04	2	2	0	3	0	5	5	5	5	1	6	5	4	2	5	5	5	5	6	3	5	3	5	5	5	2	5
3	477	29	0	86	1.89	24.0755	2	2	1	3	1	5	5	5	3	7	5	6	5	4	4	8	5	4	5	7	2	2	5	5	4	3	5
3	478	25	0	90	1.75	29.3878	3	2	1	3	1	7	7	5	5	7	5	5	5	5	5	5	5	4	5	4	5	4	5	5	4	5	5
3	479	30	0	79	1.86	22.835	2	2	1	1	1	3	1	5	5	5	7	5	6	5	5	8	7	3	7	3	2	5	7	2	7	5	5
3	481	27	1	79	1.6	30.8594	4	2	0	2	1	3	2	5	1	6	7	3	9	4	7	3	9	1	6	9	5	2	5	5	5	7	5
3	482	29	0	82	1.8	25.3086	3	2	1	2	1	5	4	6	7	8	8	5	3	2	5	6	5	7	5	4	3	5	5	5	6	5	5
3	484	27	1	47	1.53	20.0777	2	2	0	2	1	1	1	6	1	4	6	1	1	1	4	1	5	3	5	1	1	1	5	1	5	1	5
3	488	28	0	75	1.8	23.1481	2	3	1	2	1	4	6	5	3	8	5	6	3	3	5	5	5	4	5	6	4	3	5	4	5	5	6
3	491	27	0	69	1.77	22.0243	2	3	1	2	1	6	5	5	5	7	6	3	4	3	4	5	6	6	7	6	4	4	7	7	5	4	5
3	494	32	1	59	1.65	21.6713	2	2	1	3	1	8	6	5	5	9	6	7	3	7	5	5	7	5	5	4	4	1	5	5	6	4	6
3	496	27	1	51	1.55	21.2279	2	3	1	3	1	9	8	7	8	9	8	5	4	7	5	5	5	5	5	5	5	5	7	5	5	3	7
3	497	31	1	65	1.65	23.8751	2	3	0	2	1	1	1	6	1	9	6	8	1	1	1	5	5	4	6	5	5	1	5	5	5	5	6
3	498	26	1	82	1.57	33.2671	4	3	0	2	1	3	3	5	3	7	5	3	2	7	2	5	5	6	5	2	2	3	1	3	5	4	5
3	499	31	1	65	1.65	23.8751	2	3	0	2	1	1	1	6	1	9	6	8	1	1	1	5	5	4	6	5	5	1	5	5	5	5	6
3	500	31	1	58	1.63	21.83	2	1	0	3	1	4	4	6	4	6	4	4	3	3	3	6	6	3	6	4	3	3	2	5	5	3	5
3	501	34	0	76	1.77	24.2587	2	2	1	2	1	4	5	5	6	3	5	5	3	5	5	5	5	4	5	4	2	2	2	5	3	5	5
3	503	28	0	65	1.68	23.03	2	2	1	3	1	7	7	4	5	7	5	6	4	4	5	7	5	5	3	3	4	3	5	5	5	5	5
3	507	26	1	68	1.58	27.2392	3	3	1	3	1	9	7	1	5	9	4	7	5	7	9	1	5	4	1	9	1	1	5	7	5	1	7
3	508	34	1	65	1.67	23.3067	2	2	1	3	1	1	7	7	5	7	6	6	5	5	5	6	5	5	5	6	1	1	5	1	6	1	5
3	509	26	1	94	1.61	36.264	4	2	1	2	1	3	5	4	5	4	5	1	5	3	6	5	7	5	5	4	5	1	5	1	5	5	5
3	511	32	0	82	1.8	25.3086	3	3	1	2	0	3	3	5	4	1	6	3	3	1	4	5	6	5	5	2	3	1	5	4	5	3	6
3	512	26	1	62	1.65	22.7732	2	1	1	2	1	3	7	4	6	7	7	7	6	3	5	4	5	6	4	7	6	3	4	4	4	6	5
3	513	25	1	58	1.56	23.833	2	2	1	1	1	3	6	5	5	6	1	7	1	6	1	5	1	5	1	6	3	5	3	1	3	6	5
3	514	26	1	59	1.66	21.4109	2	3	1	3	1	7	5	5	5	8	5	5	4	5	3	5	5	5	5	7	5	3	5	5	5	5	5
3	515	30	0	84	1.83	25.0829	3	2	1	1	1	3	2	5	5	7	5	4	7	5	5	3	5	2	2	5	5	5	5	6	5	5	7
3	516	35	0	71	1.74	23.4509	2	2	1	1	1	5	5	5	5	5	5	5	5	5	5	5	5	5	5	5	5	5	7	5	5	3	5
3	518	34	0	72	1.74	23.7812	2	2	1	2	1	5	9	3	3	9	4	4	8	5	7	1	2	3	1	1	1	1	2	1	9	2	9
3	520	33	0	52	1.6	20.3125	2	2	0	2	1	5	5	5	5	5	5	5	5	4	5	5	5	5	5	5	5	5	5	5	5	5	5
3	522	27	1	79	1.65	29.0174	3	2	1	3	1	7	6	5	4	8	7	7	5	5	5	5	5	5	6	7	4	5	5	5	4	5	5
3	523	25	1	58	1.65	21.3039	2	1	0	2	1	2	5	5	5	7	6	6	4	1	2	5	5	3	3	2	2	3	2	1	2	2	5
3	526	31	0	72	1.81	21.9774	2	1	1	1	1	1	4	6	4	9	7	6	1	1	3	7	7	1	6	3	3	1	7	1	5	7	5
3	527	31		60	1.75	19.5918	2	2	1	2	1	5	5	5	5	5	5	5	5	5	5	5	5	5	5	5	5	3	8	5	5	5	7
3	528	33	1	60	1.65	22.0386	2	2	1	3	1	9	9	5	9	9	5	5	2	2	5	5	5	5	5	1	5	1	2	2	5	5	5
3	529	32	1	57	1.69	19.9573	2	2	1	3	1	3	7	5	7	9	6	8	5	3	5	5	5	7	5	7	7	2	6	7	5	7	6
3	530	30	1	49	1.55	20.3954	2	2	1	3	1	4	4	5	4	4	7	3	3	3	2	7	7	6	7	2	2	3	3	3	7	3	8
3	531	27	1	55	1.64	20.4491	2	3	0	2	1	2	4	5	6	2	5	4	2	2	2	5	5	3	6	2	1	1	5	2	5	2	6
3	532	30	1	67	1.5	29.7778	3	2	1	3	1	1	6	5	6	9	6	9	7	1	1	5	5	6	5	1	5	1	4	1	4	5	6
3	533	29	1	59	1.6	23.0469	2	2	1	3	1	7	7	3	5	9	5	8	6	7	5	5	5	8	5	8	6	7	5	5	5	5	5
3	534	31	0	80	1.81	24.4193	2	2	1	3	1	9	9	2	1	4	5	9	5	9	1	1	5	6	3	1	1	1	5	3	1	9	5
3	535	32	1	70	1.65	25.7117	3	2	1	3	1	4	6	5	6	8	7	7	5	7	5	7	7	7	8	8	6	7	4	8	8	4	7
3	536	29	0	87	1.74	28.7356	3	2	0	2	0	5	5	5	5	5	5	5	5	5	5	5	5	5	5	5	5	5	5	5	5	5	5
3	537	35	0	67	1.63	25.2174	3	2	1	2	1	7	7	5	5	7	5	7	5	7	5	5	5	9	5	8	5	5	5	5	5	5	5
3	538	25	0	53	1.73	17.7086	1	3	0	2	0	5	5	5	2	3	5	5	5	5	5	5	5	5	5	3	2	5	5	5	5	5	5
3	539	27	1	53	1.63	19.9481	2	3	1	2	0	5	5	5	5	5	5	5	5	5	5	5	5	5	5	5	5	5	5	5	5	5	5
3	541	25	1	65	1.68	23.03	2	3	0	2	1	6	5	6	3	6	5	4	4	6	5	5	5	4	5	6	5	6	5	7	5	5	5
3	542	25	1	77	1.58	30.8444	4	2	1	3	1	9	9	1	9	9	5	9	6	9	5	1	1	1	1	6	3	2	5	5	2	1	8
3	543	26	0					3	1	2	1	3	2	5	3	7	8	5	5	7	5	6	5	6	5	4	3	2	6	3	7	4	7
3	546	32	0	56	1.7	19.3772	2	2	1	3	0	5	5	5	4	1	6	4	3	3	3	7	5	5	6	3	2	3	5	2	6	5	6
3	547	29	1	61	1.7	21.1073	2	3	1	2	1	4	4	5	5	7	5	6	6	4	4	5	5	4	5	5	3	3	5	5	5	5	5
3	548	30	1	68	1.7	23.5294	2	3	0	1	1	4	6	5	5	3	5	6	5	5	5	7	6	5	5	4	5	5	5	5	5	5	5
3	551	30	1	51	1.6	19.9219	2	2	0	2	1	6	7	5	7	8	3	8	5	6	1	5	4	4	5	1	1	1	5	4	3	4	7
3	552	28	1	75	1.64	27.8852	3	2	1	3	1	4	7	5	7	7	7	7	5	4	3	5	5	5	5	8	5	7	5	4	5	5	5
3	553	25	1	77	1.58	30.8444	4	2	1	3	1	9	9	1	9	9	5	9	6	9	5	1	1	1	1	6	3	2	5	5	2	1	8
3	554	26	1	60	1.63	22.5827	2	2	1	1	1	7	9	1	6	9	2	9	7	7	5	4	4	8	2	9	6	4	5	5	5	4	5
3	555	35	1	86	1.66	31.2092	4	3	1	3	1	8	7	6	5	9	5	7	3	6	7	4	3	5	3	9	7	5	5	7	2	7	7
3	558	32	0	110	1.78	34.7178	4	1	1	3	1	8	8	5	9	9	4	8	7	8	5	4	4	6	4	8	6	5	5	5	5	7	5
3	559	25	1	50	1.67	17.9282	1	1	1	3	1	7	6	5	5	9	5	8	1	1	5	5	5	9	6	9	5	1	7	1	1	9	5
3	560	34	1	62	1.7	21.4533	2	1	1	2	1	2	5	5	5	8	7	5	2	2	5	5	5	5	5	4	5	2	5	5	7	5	5
3	561	34	1	62	1.73	20.7157	2	3	1	3	1	1	1	5	5	7	5	6	5	8	1	5	5	5	5	7	1	1	3	1	5	7	5
3	563	27	1	63	1.74	20.8086	2	3	1	3	1	7	9	6	3	9	6	3	3	4	1	5	5	6	7	6	3	3	7	3	3	4	7
3	564	26	1	56	1.58	22.4323	2	3	1	2	1	6	4	5	6	6	6	5	4	6	5	5	5	5	5	3	3	3	4	6	5	6	5
3	565	28	1	75	1.64	27.8852	3	2	1	3	1	4	7	5	7	7	7	7	5	4	3	5	5	5	5	8	5	7	5	4	5	5	5
3	567	26	1	64	1.67	22.9481	2	2	1	2	1	6	5	5	5	7	5	3	4	5	5	5	5	5	5	6	5	1	5	5	5	5	5
3	569	32	0	54	1.69	18.9069	2	1	0	2	1	3	3	5	2	3	7	5	4	2	5	7	5	3	6	4	3	5	5	2	4	5	5
3	570	28	1	67	1.65	24.6097	2	2	1	3	1	7	7	2	5	9	5	5	1	1	5	7	7	5	5	1	1	5	5	1	5	9	5
3	572	26	1	62.3	1.64	23.1633	2	2	1	3	1	9	7	6	8	9	6	8	1	9	1	5	7	1	6	1	1	1	9	1	5	1	5
3	574	28	1	58	1.5	25.7778	3	1	1	3	1	5	5	5	5	9	5	5	5	5	5	5	5	7	5	3	2	1	5	5	5	5	5
3	575	32	1	57	1.57	23.1247	2	2	1	1	1	1	3	5	4	2	5	5	2	1	3	6	6	3	5	3	1	1	3	1	5	5	5
3	577	29	1	65	1.55	27.0552	3	2	1	3	1	3	1	5	3	7	5	2	7	7	3	5	6	7	5	5	3	2	5	6	5	4	5
3	579	26	0	84	1.69	29.4107	3	3	1	3	1	9	7	5	9	9	5	8	5	5	5	6	5	9	5	9	9	9	9	9	4	9	5
3	580	25	0	86	1.78	27.143	3	2	1	1	1	5	5	5	5	5	5	5	5	5	5	5	5	7	5	5	5	5	5	5	5	5	5
3	581	25	0	83.6	1.83	24.9634	2	1	1	1	1	8	8	5	5	1	6	7	5	7	2	6	5	5	6	5	7	3	5	8	5	5	5
3	582	31	0	76	1.7	26.2976	3	2	1	3	1	6	6	4	4	8	4	6	5	7	3	6	3	4	4	3	3	3	7	9	3	3	6
3	584	25	1	55	1.75	17.9592	1	2	0	2	1	5	5	7	6	8	8	5	3	5	5	7	5	5	6	6	5	1	5	6	6	5	5
3	586	26	1					1	0	2	0	5	5	5	5	5	5	5	5	5	5	5	5	5	5	3	5	5	5	5	5	5	5
3	587	33	1	107	1.73	35.7513	4	2	1	3	1	5	7	5	9	9	9	9	1	1	9	6	5	5	7	1	1	9	9	5	5	4	5
3	589	30	1	60	1.57	24.3418	2	2	1	3	1	5	5	7	4	8	7	7	3	3	2	6	5	3	7	2	1	1	5	3	6	5	6
3	590	33	1	57	1.6	22.2656	2	3	1	3	0	3	3	5	5	1	5	5	5	3	3	5	5	3	4	3	3	1	5	1	5	5	5
3	591	27	1	55	1.59	21.7555	2	3	1	2	1	2	7	5	7	7	5	5	5	3	5	5	5	5	5	3	2	3	3	3	5	7	5
3	592	27	0	71	1.71	24.281	2	2	1	2	1	3	3	6	3	3	6	3	5	3	3	5	5	5	5	2	4	3	5	3	5	4	5
3	598	30	1	78	1.72	26.3656	3	2	1	3	1	3	3	6	3	9	6	3	3	9	3	7	7	9	7	3	3	3	5	8	5	5	5
3	600	34	1	64	1.65	23.5078	2	3	1	2	1	7	7	9	6	9	5	5	9	8	9	3	3	8	7	6	5	5	5	5	5	5	5
3	601	33	1	63				2	1	3	1	7	7	5	7	7	5	7	7	7	7	5	5	3	5	5	7	4	5	4	5	5	5
3	602	34	1	67	1.6	26.1719	3	2	1	3	1	6	5	3	1	8	5	6	4	9	4	4	4	5	5	1	1	3	1	1	3	4	5
3	605	34	1	144	1.82	43.473	4	2	1	3	1	1	2	5	5	1	6	3	2	2	5	5	6	7	6	9	3	1	6	7	5	3	6
3	612	28	1	59	1.56	24.2439	2	3	1	2	1	7	7	4	7	3	5	7	5	8	3	5	5	4	5	1	6	4	4	4	3	6	5
3	614	28	1	66	1.78	20.8307	2	2	1	3	1	1	7	5	9	9	5	4	3	1	5	5	7	5	7	4	6	2	4	3	5	7	5
3	615	29	1	54	1.59	21.3599	2	2	1	2	1	6	6	5	6	6	5	6	4	4	5	5	5	5	5	3	3	3	5	6	5	5	5
3	619	33	0	80	1.78	25.2493	3	3	1	3	1	7	3	5	3	7	5	3	5	3	5	6	6	5	5	3	3	3	7	3	6	5	5
3	624	27	1	57	1.74	18.8268	2	3	0	2	0	5	5	5	5	5	5	5	1	5	5	5	5	7	5	5	5	1	5	5	5	3	5
3	626	25	1	52	1.68	18.424	1	2	1	3	1	2	3	5	5	6	7	4	5	4	5	7	7	6	6	2	3	1	9	2	5	5	6
3	627	28	1	82	1.7	28.3737	3	2	1	3	1	9	5	2	1	9	6	9	1	1	3	2	2	7	1	3	8	6	8	1	1	5	6
3	630	28	1	63	1.64	23.4236	2	3	1	1	1	1	2	6	3	4	6	3	5	2	2	5	5	3	5	2	1	3	5	3	5	4	5
3	633	28	1	59	1.61	22.7615	2	2	1	2	1	5	6	5	6	7	5	6	5	4	5	5	5	5	5	6	6	4	6	6	4	4	6
3	635	28	0	80	1.65	29.3848	3	1	1	1	1	1	1	5	1	6	5	1	5	1	5	5	6	1	6	6	1	4	6	1	6	5	6
3	642	25	1					3	1	3	1	3	3	5	8	9	5	9	9	9	5	5	5	9	5	9	9	9	5	1	5	7	5
3	644	31	1	65	1.7	22.4913	2	1	1	1	1	1	1	9	1	1	9	1	1	1	1	9	9	1	9	1	1	1	1	1	1	1	1
3	651	30	1	70	1.7	24.2215	2	1	1	3	1	8	8	1	1	9	1	9	1	9	1	5	5	5	5	9	5	5	5	9	5	9	5
3	655	25	0	64	1.83	19.1108	2	3	1	1	0	5	5	6	5	8	6	5	4	5	4	6	6	5	5	4	4	3	5	5	5	5	5
3	656	30	1	92	1.69	32.2118	4	2	1	3	1	9	9	5	1	9	5	9	1	9	1	5	5	9	5	1	1	1	5	9	3	9	6
3	657	25	1	68	1.65	24.977	2	2	0	3	1	1	3	9	3	9	9	1	1	1	1	9	9	9	9	1	9	1	1	1	9	1	9
3	660	35	1	48.5	1.61	18.7107	2	2	1	1	0	3	5	5	5	5	6	5	3	2	5	5	6	5	5	5	5	2	6	3	5	5	7
3	662	27	1	67	1.62	25.5296	3	2	1	3	1	5	7	5	7	8	5	7	4	5	4	5	5	7	5	7	4	6	7	3	3	5	6
3	664	31	1	50.8	1.63	19.12	2	1	1	1	0	1	1	5	1	1	5	5	7	5	1	5	5	5	5	5	1	1	5	5	5	1	5
3	665	26	1	67	1.72	22.6474	2	2	1	3	1	8	6	4	1	9	5	7	5	7	4	5	5	4	5	3	7	5	5	3	1	5	2
3	669	27	1	105	1.58	42.0606	4	2	1	3	1	5	5	5	5	7	9	5	9	9	5	9	9	9	9	3	3	3	9	3	9	3	9
3	670	35	1	86	1.66	31.2092	4	2	1	1	1	9	9	1	5	9	5	6	6	9	3	3	4	8	5	6	4	6	4	4	3	9	5
3	671	25	0	67.4	1.67	24.1672	2	1	1	2	1	9	9	4	9	9	1	9	9	9	9	3	5	9	1	9	9	9	9	9	3	9	1
3	674	25	1	61	1.6	23.8281	2	2	1	3	1	6	7	5	7	6	5	6	7	8	5	5	5	6	5	9	5	5	5	7	6	5	5
3	677	25	0	67	1.72	22.6474	2	2	0	2	1	6	4	5	1	7	5	3	2	6	1	6	5	8	4	3	1	2	5	1	5	2	6
3	679	35	1	59	1.77	18.8324	2	3	0	2	0	3	1	5	3	1	5	1	2	1	1	6	5	5	3	2	5	1	4	6	5	3	5
3	681	29	1	75	1.56	30.8185	4	1	1	3	1	4	4	5	4	9	5	9	4	9	3	4	4	9	4	9	9	9	9	9	4	6	5
3	683	30	1	73	1.74	24.1115	2	2	1	2	1	3	3	7	6	6	8	2	5	1	5	8	9	2	5	6	4	1	5	5	7	5	7
3	684	31	1	58	1.58	23.2335	2	1	1	3	1	5	6	5	4	4	7	6	4	5	4	6	5	4	5	3	2	3	5	4	4	3	5
3	688	26	1	80	1.7	27.6817	3	2	1	3	1	5	7	4	3	9	5	2	6	9	2	5	5	5	4	3	2	1	6	6	5	7	5
3	689	35	1	80	1.68	28.3447	3	2	1	3	1	8	5	3	5	9	5	7	3	8	5	5	5	5	5	5	3	1	5	3	5	5	5
3	690	31	1	76	1.63	28.6048	3	1	1	3	1	6	6	5	5	6	5	6	6	6	5	5	5	4	5	4	5	5	5	6	5	5	5
3	691	32	0	83	1.83	24.7843	2	3	1	1	1	5	5	6	5	6	6	5	5	4	5	5	5	6	5	4	5	3	5	5	5	5	6
3	692	26	1	42	1.55	17.4818	1	2	1	3	1	7	6	6	3	4	5	4	5	1	5	5	6	5	5	3	1	2	5	3	7	1	5
3	693	26	1	54	1.66	19.5965	2	2	1	3	1	8	8	1	5	8	1	8	5	8	8	1	1	1	2	8	1	1	1	8	1	2	8
3	694	30	0	105	1.8	32.4074	4	3	0	2	1	6	8	5	7	8	6	6	4	6	5	6	5	6	5	6	5	5	6	8	4	7	5
3	705	26	0	64.1	1.8	19.784	2	2	0	2	0	4	5	5	5	3	5	7	3	5	5	5	5	5	2	3	5	5	5	5	1	5	5
3	706	33	1	80	1.65	29.3848	3	2	1	2	1	3	5	5	4	9	5	8	9	3	4	4	5	7	4	9	7	5	3	8	4	7	4
3	707	32	1	39	1.59	15.4266	1	3	0	2	1	4	4	5	9	8	5	9	2	2	3	5	5	5	5	4	2	2	5	2	5	7	6
3	708	31	1	58	1.63	21.83	2	2	1	2	1	4	6	5	4	6	5	5	3	4	5	5	5	4	5	4	3	3	5	4	5	5	5
3	713	35	1	58	1.6	22.6562	2	2	1	3	1	7	7	3	7	7	1	7	6	7	6	2	2	5	1	7	6	5	1	7	1	6	1
3	718	28	1	70	1.57	28.3987	3	2	1	3	1	5	5	5	3	6	5	3	5	7	2	5	5	5	5	2	2	2	5	2	5	2	5
3	726	31	0	110	1.9	30.4709	4	3	0	2	1	3	5	5	2	9	6	9	5	9	5	4	5	4	5	3	2	1	5	1	5	5	5
3	732	26	1	57	1.6	22.2656	2	1	1	3	1	2	4	5	5	9	5	9	5	2	5	5	5	5	5	6	4	3	5	4	4	7	5
3	734	29	1	74	1.56	30.4076	4	2	1	3	1	7	9	5	9	9	6	9	4	3	2	5	5	2	5	3	3	1	5	2	4	2	5
3	736	25	1	53	1.63	19.9481	2	1	1	3	1	1	1	9	1	1	9	1	1	1	1	9	9	1	9	1	1	2	1	1	1	9	1
3	737	34	1	65	1.64	24.1672	2	2	1	3	1	6	8	5	5	9	5	7	5	8	5	5	5	7	5	7	5	5	5	5	3	6	5
3	740	27	1	87	1.64	32.3468	4	1	1	2	1	9	8	5	5	9	5	9	1	9	7	3	3	2	6	8	9	3	4	3	5	7	5
3	744	35	1	77	1.62	29.34	3	2	1	3	1	9	9	1	9	9	1	9	9	9	5	1	1	9	1	9	9	9	1	9	1	9	1
3	745	28	0	86	1.82	25.963	3	3	1	3	1	1	7	6	5	8	5	7	5	1	3	6	5	3	5	5	5	5	5	1	7	5	5
3	746	25	1	61	1.56	25.0657	3	2	1	3	1	2	7	5	8	8	5	6	6	1	5	6	5	7	5	7	3	1	3	2	5	3	5
3	747	27	1	55	1.6	21.4844	2	3	1	3	1	7	5	5	5	9	5	6	5	3	5	5	5	7	5	7	5	5	1	1	5	5	5
3	749	30	0	75	1.72	25.3515	3	2	1	1	1	3	5	5	5	3	5	7	1	3	5	5	5	5	5	3	7	2	5	7	3	7	5
3	750	29	1	153	1.74	50.5351	4	2	1	3	1	6	5	6	6	5	5	7	8	5	5	5	5	4	7	6	6	5	4	5	4	5	6
3	752	27	1	65	1.52	28.1337	3	2	1	3	1	6	6	4	4	7	5	6	4	4	4	5	4	6	5	6	4	6	3	6	5	3	5
3	753	25	0	89	1.85	26.0044	3	2	1	3	1	3	5	5	5	2	5	8	6	2	5	5	5	5	5	5	5	5	5	5	5	5	5
3	754	30	0	72.3	1.76	23.3407	2	3	0	1	1	4	4	5	5	7	5	7	5	3	5	5	5	5	5	5	5	7	5	7	5	5	5
3	757	31	1	91	1.71	31.1207	4	2	0	2	1	7	7	5	7	7	5	7	5	5	3	5	5	7	5	3	3	3	5	7	5	7	5
3	758	30	0	90	1.78	28.4055	3	2	1	3	1	7	7	5	7	8	6	8	4	3	5	6	6	6	6	6	6	4	3	3	6	6	5
3	759	35	1	59	1.6	23.0469	2	3	1	3	1	3	5	5	5	3	5	5	5	3	3	6	6	5	6	3	3	2	5	2	6	2	5
3	762	30	1	75	1.6	29.2969	3	1	0	2	1	5	5	5	5	7	5	5	6	3	3	5	5	5	5	7	5	3	5	5	5	5	5
3	763	31	1	75	1.7	25.9516	3	3	1	3	1	3	5	5	5	5	7	5	5	3	5	5	5	5	5	5	4	5	5	3	5	5	7
3	764	29	0	98	1.74	32.3689	4		0	2	1	5	5	5	5	7	5	3	7	5	5	7	9	8	8	7	5	5	5	5	6	5	5
3	765	34	1	64	1.62	24.3865	2	2	1	3	1	7	7	6	7	8	6	6	5	6	5	8	5	7	5	6	5	5	5	7	6	5	5
3	766	34	1	65	1.6	25.3906	3	3	1	3	1	8	8	5	7	9	5	8	5	8	5	5	5	5	5	8	8	8	5	8	7	7	5
3	767	31	1	54	1.65	19.8347	2	3	1	1	1	7	4	4	6	8	4	7	8	4	4	5	5	4	4	6	5	4	4	4	3	6	4
3	769	34	1	68	1.7	23.5294	2	3	1	3	1	5	5	5	5	6	6	5	5	5	5	5	5	5	5	7	6	6	5	5	5	6	6
3	770	34	0	70	1.82	21.1327	2	3	1	3	1	7	5	5	5	5	7	5	5	6	5	5	5	5	5	5	5	5	5	5	5	5	7
3	771	30	0	60	1.6	23.4375	2	2	1	1	0	1	1	5	5	1	5	5	5	1	1	5	5	2	5	1	1	1	5	1	5	1	5
3	772	35	1	76	1.65	27.9155	3	3	1	3	1	5	5	5	5	9	5	5	5	6	4	5	5	5	5	4	3	1	5	5	5	3	5
3	773	26	1	70	1.64	26.0262	3	2	1	3	1	6	6	5	5	9	8	6	1	3	5	5	5	6	6	9	5	5	5	1	4	8	5
3	774	29	1	95	1.65	34.8944	4	1	1	2	1	3	3	5	3	9	7	9	7	7	7	5	5	5	6	3	3	5	6	9	5	9	5
3	775	35	1	87	1.73	29.0688	3	3	1	2	1	4	5	5	5	7	6	2	8	2	2	6	6	5	6	7	2	2	5	2	7	5	7
3	776	31	0	84	1.73	28.0664	3	2	0	3	1	2	2	5	4	7	6	3	5	3	5	6	6	6	6	4	3	3	5	3	6	3	6
3	780	34	0	66	1.68	23.3844	2	2	1	2	1	7	7	4	5	7	4	8	6	6	5	5	5	4	4	4	6	4	6	6	6	5	5
3	782	34	1	55	1.63	20.7008	2	2	1	3	1	6	6	5	5	8	6	4	4	6	4	5	5	5	5	2	5	4	5	5	6	5	6
3	783	32	1	61	1.58	24.4352	2	3	1	3	1	7	7	5	6	9	6	8	4	6	2	5	5	7	5	7	7	8	5	3	5	6	5
3	784	31	1	53	1.6	20.7031	2	3	1	1	1	1	5	5	5	7	5	6	2	1	4	5	5	7	5	3	1	1	5	3	5	6	5
3	785	28	1	56	1.68	19.8413	2	2	1	2	1	7	1	5	1	7	5	6	1	1	5	5	5	5	5	1	1	1	5	5	5	3	5
3	786	25	1	59	1.61	22.7615	2	2	0	1	0	6	5	5	5	5	7	6	7	6	5	6	6	6	7	5	5	5	7	5	6	6	6
3	787	31	0	90	1.78	28.4055	3	3	0	3	1	5	5	2	5	4	7	5	7	5	5	6	5	5	7	5	5	5	5	3	6	5	7
3	788	33	0	66	1.71	22.571	2	2	1	1	0	5	5	5	5	7	5	5	4	5	5	5	5	5	5	5	5	5	5	5	5	5	5
3	792	26	1	59	1.64	21.9363	2	2	1	3	1	9	9	5	9	9	5	5	5	5	1	5	5	5	1	5	6	1	1	6	4	5	6
3	795	30	1	64	1.63	24.0882	2	2	0	2	0	3	5	5	5	6	6	3	3	3	5	5	5	4	6	3	3	2	6	4	4	4	5
3	798	27	0	63	1.73	21.0498	2	2	1	1	1	3	3	8	4	2	9	3	8	2	4	8	9	8	6	2	3	2	7	4	6	2	7
3	800	26	1	52	1.68	18.424	1	2	0	3	1	6	6	5	6	7	7	6	3	3	3	7	7	5	6	4	4	4	6	6	4	4	7
3	801	29	0	80	1.75	26.1224	3	2	1	3	1	5	5	8	3	9	5	5	8	7	6	3	7	7	5	7	7	7	5	7	5	7	5
3	802	26	1	55	1.55	22.8928	2	1	1	3	1	9	9	7	9	9	6	9	9	9	9	4	5	5	7	9	8	9	6	9	4	8	5
3	804	27	1	60	1.6	23.4375	2	1	1	3	1	1	1	5	4	2	7	3	5	3	5	7	7	5	5	2	1	1	5	2	5	2	6
3	808	29	1	70	1.62	26.6728	3	3	1	3	1	9	8	1	8	7	1	9	8	8	8	1	5	3	1	8	9	8	1	8	5	8	5
3	812	27	0	63	1.7	21.7993	2	2	1	3	1	6	6	5	2	8	6	4	2	2	3	7	5	3	4	1	2	1	4	8	5	6	7
3	817	35	0	76	1.82	22.9441	2	3	0	2	1	8	3	8	1	1	7	1	1	1	1	1	5	5	7	5	1	1	5	5	5	1	5
3	818	25	0	100	1.71	34.1986	4	2	0	2	1	5	5	5	5	6	5	5	5	6	5	5	5	5	5	5	5	5	5	5	5	5	5
3	820	33	0	95	1.95	24.9836	2	2	0	2	0	5	5	5	5	5	5	5	5	5	5	6	6	6	6	5	5	5	5	5	7	5	7
3	821	35	0	85	1.8	26.2346	3	2	0	1	1	2	3	5	3	6	5	8	7	1	5	5	5	5	6	6	7	1	7	1	5	5	7
3	824	34	1	61.5	1.64	22.8659	2	2	1	2	1	5	5	6	5	9	5	8	6	5	3	5	4	5	5	2	1	3	5	5	3	5	5
3	829	35	1	70	1.62	26.6728	3	3	1	2	1	7	7	5	5	9	5	7	4	6	5	4	5	5	5	8	4	1	5	2	5	5	5
3	836	27	1	63	1.62	24.0055	2	2	1	3	1	9	9	8	7	9	9	7	8	9	5	6	6	6	6	5	4	3	5	7	5	4	8
3	844	27	1	56	1.66	20.3223	2	1	1	1	1	2	6	6	7	1	5	7	2	1	1	7	6	2	7	6	5	6	8	6	8	2	9
3	846	25	0	78	1.85	22.7904	2	3	0	2	0	1	1	5	5	1	5	1	5	1	1	5	5	5	5	5	1	1	1	1	5	1	5
3	848	29	1	93	1.6	36.3281	4	2	1	3	1	9	9	9	9	9	9	9	9	9	9	9	9	9	9	9	9	9	4	4	5	9	9
3	851	25	0	71	1.72	23.9995	2	1	1	1	1	2	3	5	5	2	5	2	2	1	5	5	5	2	7	5	5	2	5	2	5	2	5
3	852	25	0	71	1.7	24.5675	2	3	0	2	1	4	3	5	5	7	6	5	1	5	5	6	6	5	7	4	1	3	5	4	7	5	7
3	856	32	1	102	1.7	35.2941	4	1	1	1	1	8	8	5	8	9	7	7	3	7	5	5	5	9	5	7	6	7	4	8	2	8	5
3	857	30	1	53.5	1.57	21.7047	2	1	1	1	1	3	7	5	7	7	6	8	7	1	7	5	5	6	5	6	5	1	5	1	3	7	5
3	858	29	1	59	1.57	23.9361	2	2	1	2	1	7	5	5	5	7	5	6	5	6	5	5	5	4	5	7	6	3	5	5	2	4	5
3	859	31	1	71	1.7	24.5675	2	2	1	3	1	5	5	5	5	6	5	5	3	5	5	5	5	4	5	3	5	5	5	5	6	5	5
3	861	25	1	56	1.6	21.875	2	2	0	2	0	5	5	5	5	5	5	5	5	5	5	5	5	5	5	5	5	5	5	5	5	5	5
3	862	28	1	75	1.72	25.3515	3	2	1	3	1	1	2	5	6	7	5	7	5	4	5	5	5	5	5	5	3	1	4	1	2	5	5
3	863	28	0	76	1.75	24.8163	2	3	0	2	1	5	6	7	3	3	7	6	3	3	3	7	5	6	6	5	5	3	7	5	3	3	7
3	864	31	0	93	1.86	26.8817	3	2	1	1	0	5	5	5	5	7	5	5	5	5	5	5	5	7	5	3	5	5	5	5	5	5	5
3	865	28	0	85	1.79	26.5285	3	2	1	2	1	6	5	5	5	7	9	5	7	3	5	7	9	8	7	6	5	5	8	1	7	5	9
3	866	28	0	85	1.84	25.1063	3	2	0	2	1	3	4	5	3	7	5	4	4	3	5	5	5	5	5	5	4	2	5	3	5	2	7
3	867	30	1	76	1.71	25.9909	3	2	1	3	1	2	3	5	3	8	6	6	5	4	4	5	5	4	6	9	2	1	5	4	5	3	6
3	868	25	1	58	1.74	19.1571	2	3	1	1	1	2	2	5	5	6	7	5	5	5	2	7	7	5	8	3	5	2	8	5	7	5	7
3	869	28	1	56	1.52	24.2382	2	3	1	2	1	3	7	5	7	9	6	7	3	2	4	5	5	7	6	7	3	2	3	7	2	6	6
3	871	32	1	51	1.6	19.9219	2	2	1	3	1	7	6	5	6	7	5	6	4	6	3	5	5	5	5	7	4	2	5	4	3	6	5
3	872	28	1	56	1.52	24.2382	2	3	1	2	1	3	7	5	7	9	6	7	3	2	4	5	5	7	6	7	3	2	3	7	2	6	6
3	873	31	0	71	1.7	24.5675	2	2	1	1	1	3	5	7	3	7	7	3	3	1	3	5	5	3	5	3	1	3	7	1	7	3	6
3	875	34	1	75	1.52	32.4619	4	1	0	2	1	7	7	7	5	8	7	8	5	7	7	5	7	5	7	6	4	4	5	5	7	4	7
3	877	28	1	63	1.71	21.5451	2	3	1	3	1	3	6	5	5	9	5	6	4	8	5	5	5	5	5	4	4	5	5	6	5	6	5
3	880	25	1	49	1.6	19.1406	2	2	1	2	1	4	7	5	5	3	5	6	5	5	5	5	5	5	5	3	5	3	5	3	5	5	6
3	882	29	1	55	1.62	20.9572	2	2	1	1	1	5	5	5	5	7	5	5	5	5	5	5	5	5	5	5	5	5	6	5	6	5	6
3	884	35	1	64	1.72	21.6333	2	3	0	2	1	8	8	4	8	9	4	8	8	8	8	6	5	5	4	7	7	4	3	8	4	8	4
3	885	34	1	71	1.7	24.5675	2	3	1	2	1	3	5	7	5	7	6	4	5	3	5	5	7	4	6	7	3	3	1	3	6	5	6
3	886	27	1	53	1.6	20.7031	2	2	1	3	1	9	9	6	6	9	6	9	9	9	7	3	4	5	2	8	7	9	5	5	3	8	6
3	887	27	1	65	1.61	25.0762	3	1	1	2	1	8	6	4	7	9	5	7	6	9	3	5	4	5	5	5	3	1	5	6	5	4	4
3	888	35	1	68	1.7	23.5294	2	1	1	3	1	4	7	7	6	9	7	4	5	9	2	5	7	9	5	3	4	4	6	1	4	1	5
3	889	34	1	54	1.65	19.8347	2	2	0	2	1	5	5	5	5	3	5	5	5	5	5	5	5	5	5	3	5	5	3	3	4	4	5
3	895	26	1	64	1.65	23.5078	2	3	1	3	1	5	5	5	7	8	1	8	5	7	1	8	1	1	1	1	1	1	9	5	5	7	9
3	897	27	1	75	1.75	24.4898	2	2	1	3	1	2	2	5	2	4	6	3	3	3	3	8	7	3	7	6	4	7	5	7	5	6	6
3	898	27	0	80	1.72	27.0416	3	3	1	3	1	9	9	1	9	9	1	9	9	9	5	5	5	9	5	9	9	5	1	9	1	9	5
3	900	29	1	78	1.67	27.968	3	2	1	3	1	7	7	2	4	8	5	7	6	8	3	6	6	6	5	3	2	3	3	1	7	1	7
3	903	25	1	64	1.59	25.3155	3	3	1	3	1	9	8	5	9	9	5	9	9	9	1	5	5	5	5	7	2	1	5	5	5	6	9
3	906	25	1	58	1.6	22.6562	2	2	0	3	1	6	5	5	3	4	5	5	5	5	4	5	5	6	5	3	2	2	6	3	5	6	5
3	911	26	0	93	1.84	27.4693	3	1	1	1	1	2	3	5	6	7	4	6	4	7	3	6	5	4	6	6	4	3	6	3	5	6	5
3	914	28	0	91	1.73	30.4053	4	3	1	3	1	7	6	7	5	7	7	6	6	7	5	7	7	5	7	7	7	4	7	7	5	7	7
3	917	28	0	91	1.73	30.4053	4	3	1	3	1	7	6	7	5	7	7	6	6	7	5	7	7	5	7	7	7	4	7	7	5	7	7
3	919	29	1	82	1.66	29.7576	3	3	1	3	1	9	9	5	9	9	9	5	7	9	5	7	7	7	7	7	7	7	9	5	5	9	9
3	923	25	1	86.4	1.65	31.7355	4	2	1	3	1	5	7	5	5	3	5	3	5	5	5	7	5	7	5	2	9	1	5	9	1	5	5
3	925	25	1	75	1.54	31.6242	4	2	1	3	1	9	6	5	6	9	5	9	1	9	5	5	5	9	5	4	3	4	5	9	4	6	4
3	928	28	1	71	1.74	23.4509	2	2	1	3	1	2	3	9	5	9	8	6	9	6	9	5	9	6	9	9	1	5	6	1	6	6	9
3	929	25	1					2	1	1	1	2	5	5	5	1	5	5	1	1	2	5	5	2	5	2	1	6	5	1	5	5	5
3	937	28	1	75	1.74	24.7721	2	3	1	3	1	5	5	5	5	7	5	5	5	5	5	4	5	3	5	6	3	5	5	5	5	5	5
3	938	25	1					2	1	1	1	2	5	5	5	1	5	5	1	1	2	5	5	2	5	2	1	6	5	1	5	5	5
3	939	25	1	50	1.63	18.8189	2	3	1	2	1	3	3	5	3	3	5	5	5	3	5	5	5	5	5	3	3	3	5	5	5	5	5
3	941	26	1	66	1.73	22.0522	2	2	0	2	1	7	7	5	8	7	6	7	7	8	4	5	5	7	6	6	7	6	6	7	5	7	6
3	942	30	0	85	1.85	24.8356	2	2	0	3	1	1	3	5	4	8	7	6	5	2	5	7	7	5	6	6	3	1	5	3	6	1	8
3	944	33	1	65	1.6	25.3906	3	2	0	2	1	5	9	5	9	9	7	9	9	9	4	7	7	5	5	9	5	5	5	5	4	5	5
3	947	31	1	52	1.56	21.3675	2	2	0	2	1	3	7	5	5	6	5	5	5	4	5	5	5	5	5	5	5	5	5	3	5	5	5
3	948	26	1	118	1.77	37.6648	4		1	3	1	7	5	5	1	9	7	3	3	6	1	5	5	7	5	3	1	1	5	9	5	1	7
3	949	28	1	65	1.54	27.4077	3	2	1	3	1	4	7	7	9	1	9	9	9	1	5	5	5	5	5	1	9	5	5	5	5	9	5
3	951	26	0	71.6	1.78	22.5982	2	2	1	3	1	1	1	7	1	4	8	1	6	1	6	3	7	1	8	3	1	1	1	1	1	1	1
3	952	26	1	54	1.7	18.6851	2	2	1	3	1	3	3	5	4	7	7	5	2	2	3	7	5	6	5	2	4	4	5	5	6	7	5
3	953	25	1	52	1.62	19.8141	2	1	1	2	1	3	5	5	5	8	8	7	5	3	5	6	5	7	6	7	7	6	5	4	6	5	5
3	954	34	1	60	1.56	24.6548	2	2	0	2	1	1	1	7	6	4	5	6	4	2	5	6	5	4	5	4	4	3	5	1	7	1	7
3	955	27	1	101	1.68	35.7851	4	2	1	3	1	9	9	5	5	9	5	9	5	9	5	5	5	5	5	7	6	3	9	9	5	5	5
3	956	27	0	88	1.73	29.4029	3	3	1	3	1	6	4	5	5	8	7	9	5	6	1	6	5	5	5	7	7	1	5	6	6	3	7
3	957	27	0	88	1.73	29.4029	3	3	1	3	1	6	4	5	5	8	7	9	5	6	1	6	5	5	5	7	7	1	5	6	6	3	7
3	958	26	1	68	1.61	26.2336	3	1	1	2	1	7	6	2	7	9	5	8	5	6	1	5	1	5	1	9	8	1	2	9	5	9	5
3	959	28	1	105	1.57	42.5981	4	2	0	3	1	7	7	5	7	9	5	7	6	8	5	5	5	5	5	9	9	6	5	9	5	9	5
3	960	26	1	86	1.63	32.3685	4	2	1	3	1	4	3	6	2	7	5	5	9	2	3	4	5	7	5	6	3	3	4	7	4	5	4
3	961	31	1	95	1.82	28.6801	3	1	1	3	1	8	8	2	7	9	4	8	9	9	9	5	1	9	2	8	3	2	9	9	5	2	9
3	964	26	1	63	1.7	21.7993	2	2	1	1	0	5	5	5	5	5	5	5	5	5	5	5	5	5	5	5	3	5	5	3	5	5	5
3	969	25	1	77	1.64	28.6288	3	1	1	3	1	9	9	5	9	9	5	9	9	9	9	1	5	1	5	9	9	9	3	9	1	9	5
3	970	27	0	98	1.73	32.7442	4	2	1	1	0	4	5	5	5	5	6	6	4	6	4	7	6	5	6	5	5	5	6	5	5	5	6
3	973	27	1	87	1.67	31.1951	4	3	1	3	1	7	7	7	7	1	5	7	5	1	1	5	5	5	5	1	1	1	1	9	1	1	5
3	974	25	0	74	1.84	21.8573	2	2	1	2	1	6	6	5	5	1	6	3	3	7	2	5	5	5	5	2	3	1	5	5	7	6	6
3	975	27	0	63	1.59	24.9199	2	2	0	2	0	5	5	5	5	5	5	5	5	5	5	5	5	5	5	5	5	5	5	5	5	5	5
3	976	28	1	70	1.66	25.4028	3	2	1	3	1	8	8	5	9	9	7	9	9	9	5	3	3	5	7	9	8	7	5	7	2	5	7
3	977	26	1	62	1.62	23.6244	2	2	1	2	1	4	4	6	4	7	6	4	4	4	7	5	6	5	6	4	1	4	7	4	6	4	6
3	979	27	1	83	1.58	33.2479	4	3	1	3	1	6	5	5	6	7	6	6	5	6	5	5	5	6	5	7	6	5	5	5	6	6	5
3	980	34	1	53	1.64	19.7055	2	2	1	3	1	3	6	5	5	7	5	6	5	7	5	7	6	5	6	2	5	2	5	5	7	5	5
3	983	35	0	109	1.71	37.2764	4	2	1	3	1	6	6	5	7	9	5	9	9	9	1	6	6	9	5	6	1	1	5	1	6	1	6
3	985	27	1	53	1.57	21.5019	2	2	1	2	1	6	5	5	5	7	5	5	3	3	5	5	5	5	5	4	3	3	6	2	5	5	5
3	986	27	1	55	1.56	22.6003	2	1	1	3	1	7	5	5	5	8	5	6	3	4	5	5	5	5	5	4	5	4	5	4	5	3	5
3	987	34	1	96	1.73	32.0759	4	2	1	3	1	5	4	5	5	6	6	5	5	5	5	6	6	4	5	5	5	5	5	5	5	5	5
3	991	33	0	77	1.8	23.7654	2	2	0	2	1	5	5	5	5	5	7	5	3	5	5	5	7	5	6	5	4	4	6	3	5	3	5
3	994	25	1	103	1.69	36.0632	4	2	1	2	1	7	5	7	3	7	7	7	4	7	1	8	8	8	6	1	3	1	5	5	3	7	8
3	995	25	1	103	1.69	36.0632	4	2	1	2	1	7	5	7	3	7	7	7	4	7	1	8	8	8	6	1	3	1	5	5	3	7	8
3	997	25	1	66	1.7	22.8374	2	3	1	3	1	7	7	4	7	9	6	3	5	1	5	7	6	3	6	3	1	1	8	3	6	7	6
3	998	25	1	79	1.67	28.3266	3	2	0	3	1	6	5	5	5	8	7	5	6	7	5	6	6	7	5	5	5	5	6	7	5	5	5
3	999	26	1	68	1.63	25.5937	3	2	1	2	1	7	7	5	5	6	5	6	6	7	5	5	5	6	5	6	4	4	5	6	6	5	5
3	1000	32	1	74	1.75	24.1633	2	2	1	3	1	6	7	5	5	9	9	5	4	6	3	1	1	9	6	9	1	1	1	1	9	1	5
3	1001	28	0	84	1.72	28.3937	3	3	1	1	1	5	2	5	5	6	5	6	3	2	3	5	5	5	5	3	5	7	3	5	5	5	6
3	1002	26	1	70	1.71	23.939	2	3	1	3	1	3	3	2	2	6	5	5	5	5	5	5	5	5	5	6	5	2	5	1	6	5	5
3	1003	30	1	58	1.61	22.3757	2	3	1	3	1	7	5	5	5	8	5	7	5	7	5	5	5	7	5	8	6	6	5	7	5	5	5
3	1004	33	1	82	1.7	28.3737	3	3	1	2	1	8	7	5	5	7	8	8	5	5	5	5	5	5	6	4	4	5	5	5	4	5	5
3	1005	35	1	63	1.58	25.2363	3	2	1	3	1	1	5	5	5	9	5	9	9	5	1	5	5	5	5	9	4	1	2	1	5	9	3
3	1006	28	1	62	1.68	21.9671	2	2	1	3	1	7	7	5	3	7	5	8	5	6	5	5	5	3	4	4	2	4	5	3	7	5	6
3	1007	29	1	75	1.73	25.0593	3	3	1	3	1	9	5	5	5	9	5	5	9	9	5	5	5	4	5	4	3	3	8	3	5	5	5
3	1008	33	1	65	1.61	25.0762	3	1	1	2	1	9	8	3	8	8	1	8	6	6	5	2	7	7	2	8	3	3	1	2	2	2	5
3	1009	32	1	122	1.73	40.7631	4	2	1	3	1	9	7	5	7	9	5	9	5	7	7	5	5	7	5	9	9	9	5	9	5	9	5
3	1010	26	1	65	1.68	23.03	2	2	1	3	1	2	5	5	5	2	5	5	5	5	5	5	5	5	5	4	4	1	5	3	4	5	5
3	1011	30	0	110	1.8	33.9506	4	3	1	2	1	7	7	5	5	8	5	9	7	7	5	5	5	5	5	7	3	1	5	7	4	7	5
3	1012	30	1	68	1.68	24.093	2	2	1	3	1	1	3	6	5	1	6	4	3	1	3	7	6	5	6	3	1	1	5	6	6	5	6
3	1013	25	1	74	1.6	28.9062	3	1	1	3	1	6	6	3	6	6	3	6	6	4	3	3	3	3	3	6	5	3	3	5	5	6	5
3	1014	26	1	57	1.67	20.4382	2	2	1	3	1	5	5	5	5	6	5	5	5	5	5	5	5	5	5	5	5	5	5	4	5	5	5
3	1015	29	1	59	1.6	23.0469	2	2	1	3	1	1	1	5	5	1	9	1	5	1	1	9	9	5	8	3	1	1	8	1	8	1	8
3	1017	27	1	70	1.52	30.2978	4	2	1	3	1	5	5	5	5	6	5	6	6	6	5	4	5	4	6	5	5	6	5	6	6	6	5
3	1019	28	1	52	1.58	20.83	2	3	1	3	1	5	5	5	5	5	7	5	5	5	5	5	5	3	5	5	3	2	5	2	5	5	7
3	1020	31	1	80	1.62	30.4832	4	2	1	3	1	4	4	5	7	9	5	7	4	4	5	5	5	3	5	5	5	5	5	7	2	5	5
3	1021	34	1	94	1.71	32.1466	4	3	1	3	1	9	9	5	5	9	5	6	4	9	4	7	5	7	5	9	5	5	5	8	5	7	5
3	1022	26	1	50	1.51	21.9289	2	1	1	3	1	6	6	5	6	6	6	5	6	6	5	6	5	6	5	6	3	3	5	6	6	5	5
3	1023	29	0	64	1.8	19.7531	2	1	1	1	1	3	3	5	5	4	7	3	7	4	5	5	5	5	5	3	5	4	7	4	5	4	5
3	1025	27	1	64.5	1.61	24.8833	2	2	1	3	1	2	5	3	5	8	5	6	5	1	5	5	5	7	5	5	3	3	5	2	2	2	5
3	1026	29	1	79	1.64	29.3724	3	3	0	2	1	7	5	5	5	3	6	4	7	5	2	5	5	5	5	7	3	3	5	6	5	5	6
3	1028	28	0	63	1.63	23.7118	2	3	1	1	1	7	6	5	5	8	6	6	4	6	7	5	6	7	6	6	6	5	5	5	6	2	6
3	1029	25	1	77.9	1.72	26.3318	3	1	1	2	1	1	3	5	3	8	5	7	3	3	3	5	5	5	5	3	3	3	5	5	5	5	5
3	1030	29	1	65	1.7	22.4913	2	2	1	3	1	6	5	5	5	7	5	5	3	3	5	5	5	6	5	5	5	2	5	2	5	5	6
3	1031	28	0	75	1.73	25.0593	3	2	0	2	1	5	4	4	4	2	2	7	8	3	6	2	1	1	1	2	2	5	5	5	5	6	6
3	1033	33	0	96	1.88	27.1616	3	3	1	3	1	4	4	5	6	6	5	3	3	4	2	6	6	6	6	4	6	2	3	6	3	4	6
3	1034	28	1	86	1.71	29.4108	3	1	1	3	1	1	7	5	5	9	7	7	5	1	3	5	5	9	6	9	5	1	5	1	5	5	5
3	1035	25	1	54	1.63	20.3244	2	3	1	3	1	9	7	5	5	6	5	5	8	7	5	5	5	5	5	7	9	9	5	5	5	6	5
3	1036	35	0	75	1.77	23.9395	2	2	1	3	1	3	3	5	4	6	6	6	2	2	1	7	5	6	4	2	2	1	5	2	6	3	7
3	1039	31	1	56	1.61	21.6041	2	2	1	1	1	7	7	5	7	8	5	7	7	7	6	5	5	6	5	7	7	7	5	5	4	5	5
3	1042	25	1	51	1.5	22.6667	2	3	1	2	1	6	2	5	5	9	3	1	1	1	1	5	5	4	6	3	1	1	5	5	5	5	6
3	1044	30	1	51	1.66	18.5078	2	3	0	2	0	5	5	6	5	1	7	5	3	4	5	8	7	4	5	1	1	1	5	1	6	5	7
3	1046	25	1	77	1.7	26.6436	3	1	1	2	1	7	7	5	6	9	5	6	6	7	5	5	5	7	5	9	6	6	5	6	5	5	5
3	1047	27	1	68	1.63	25.5937	3	2	1	1	1	7	9	5	7	9	5	9	7	9	5	5	5	5	5	7	5	5	5	3	5	7	5
3	1049	30	0	72	1.74	23.7812	2	2	1	3	0	2	6	5	4	7	6	6	4	1	5	5	5	6	5	2	1	5	5	3	5	7	5
3	1053	27	0	59.5	1.85	17.385	1	2	1	3	1	7	6	4	8	8	4	9	9	9	9	2	1	7	4	6	6	1	2	2	6	6	4
3	1054	31	1	63	1.63	23.7118	2	3	1	2	1	5	5	6	7	7	6	4	1	1	5	5	7	6	6	9	9	1	1	5	5	1	7
3	1055	29	1	78.6	1.75	25.6653	3	2	1	3	0	1	5	5	2	1	5	5	1	1	5	5	5	5	5	1	1	1	5	2	5	5	5
3	1058	30	1	70	1.65	25.7117	3	3	1	1	1	3	5	6	6	9	6	8	7	2	1	6	5	8	5	8	2	1	1	1	5	5	5
3	1059	26	0	70	1.65	25.7117	3	2	1	1	1	1	1	7	1	5	5	5	6	6	6	3	1	5	5	1	3	1	5	1	2	1	5
3	1061	32	1	92	1.63	34.6268	4	2	1	3	1	9	9	5	3	9	9	9	5	9	1	5	5	7	5	1	1	1	1	1	5	9	7
3	1065	25	0	53	1.64	19.7055	2	1	1	2	0	5	4	6	4	4	7	7	5	4	3	6	5	6	7	2	4	3	7	5	6	5	7
3	1066	29	1	75	1.73	25.0593	3	3	1	3	1	9	5	5	5	9	5	5	9	9	5	5	5	4	5	4	3	3	8	3	5	5	5
3	1071	29	1	49	1.56	20.1348	2	3	1	3	1	3	3	5	5	6	5	6	5	5	6	5	5	7	6	6	5	3	6	3	7	3	6
3	1072	30	1	64	1.63	24.0882	2	3	0	2	1	3	3	3	6	6	3	5	5	5	5	3	5	5	3	3	4	6	5	5	5	6	3
3	1073	27	1	86	1.76	27.7634	3	2	1	3	1	4	3	7	9	4	6	9	8	4	7	5	5	7	5	9	9	4	4	1	6	1	6
3	1076	26	1	65	1.63	24.4646	2	2	1	3	1	8	7	5	5	9	5	9	5	9	5	6	5	6	5	9	8	8	5	5	5	5	5
3	1077	27	1	79	1.62	30.1021	4	3	1	2	1	5	6	5	7	8	5	7	5	7	5	5	7	6	6	5	5	1	3	2	6	4	5
3	1078	34	1	68	1.8	20.9877	2	3	0	2	1	2	2	5	5	8	5	5	8	3	5	5	6	4	6	9	4	2	5	5	3	5	5
3	1080	25	1	49	1.6	19.1406	2	3	1	2	1	3	3	5	5	7	5	3	6	1	4	6	5	5	5	4	5	3	5	5	6	5	5
3	1082	25	1	78	1.67	27.968	3	2	1	3	1	5	4	5	6	8	6	6	6	6	1	5	6	6	4	6	1	1	6	1	4	5	6
3	1084	28	1	104	1.65	38.2002	4	3	1	3	1	7	7	6	7	9	9	8	7	8	6	5	5	6	6	7	7	7	4	6	5	7	7
3	1086	26	0	62	1.72	20.9573	2	3	1	3	0	5	5	5	5	1	7	5	4	5	5	6	5	5	6	3	5	5	5	5	2	5	7
3	1087	32	1	92	1.63	34.6268	4	2	1	3	1	9	9	5	3	9	9	9	5	9	1	5	5	7	5	1	1	1	1	1	5	9	7
3	1088	29	1		1.5			2	0	2	1	5	5	6	5	5	7	5	5	5	5	7	6	5	7	5	5	5	5	5	5	5	7
3	1089	30	1	62	1.63	23.3355	2	2	1	3	1	6	6	1	6	7	1	5	5	6	5	5	5	4	1	1	1	1	1	1	6	1	7
3	1090	26	1	62	1.65	22.7732	2	2	1	3	1	7	5	5	5	7	6	5	5	7	5	5	5	5	5	7	3	2	3	8	5	7	5
3	1092	30	1	75	1.58	30.0433	4	2	1	2	1	6	4	5	5	6	5	6	4	3	5	5	6	5	5	6	4	3	6	3	5	5	5
3	1093	25	1	78	1.73	26.0617	3	1	1	3	1	6	6	2	2	6	5	6	6	6	1	4	5	6	3	5	4	5	9	3	7	9	6
3	1094	27	1	85.7	1.71	29.3082	3	2	1	3	1	7	7	5	4	8	6	6	4	5	3	7	5	9	6	4	2	2	4	4	7	3	6
3	1096	25	1	71	1.63	26.7229	3	2	1	2	1	1	2	5	1	3	8	2	3	2	4	5	5	5	4	2	1	4	7	1	5	6	7
3	1097	26	1	120	1.75	39.1837	4	1	1	2	1	7	5	5	5	9	5	6	4	6	5	5	6	4	5	6	5	6	5	4	5	6	5
3	1101	30	1	70	1.67	25.0995	3	2	0	2	1	5	5	5	5	9	5	5	6	6	5	5	5	5	5	9	9	9	5	9	5	5	5
3	1105	27	0	64	1.75	20.898	2	2	0	2	1	1	5	7	5	9	7	2	5	3	5	5	5	5	5	5	3	2	7	2	5	3	6
3	1107	25	1	67	1.77	21.3859	2	2	0	3	1	1	6	5	6	8	5	3	6	1	7	5	5	5	5	7	5	2	5	4	6	5	7
3	1108	31	1	58	1.65	21.3039	2	2	0	2	1	1	1	5	1	3	5	5	5	2	2	5	5	5	5	1	1	1	2	2	5	2	5
3	1109	29	1	49	1.5	21.7778	2	3	0	2	1	5	5	5	5	6	5	6	5	5	5	6	5	4	5	5	5	5	5	5	5	5	5
3	1113	34	1	53	1.54	22.3478	2	2	0	2	1	5	5	5	5	7	5	5	4	4	4	6	5	7	5	6	4	3	4	4	5	4	5
3	1118	26	1	120	1.75	39.1837	4	2	1	1	1	7	4	5	4	7	5	7	1	4	7	5	5	6	5	1	1	1	5	5	2	5	5
3	1123	29	0	63	1.7	21.7993	2	3	0	2	0	5	5	5	5	5	5	5	5	5	5	5	5	5	5	5	5	5	5	5	5	5	5
3	1124	27	1	73	1.76	23.5666	2	2	1	2	1	3	5	5	5	8	6	8	3	4	5	6	5	5	5	7	4	5	5	8	5	3	7
3	1135	26	1	98	1.65	35.9963	4	1	1	3	1	9	9	5	3	9	9	9	3	7	2	9	5	9	5	5	5	5	8	9	6	9	5
3	1137	34	1	66	1.7	22.8374	2	2	1	2	1	4	5	4	3	9	5	7	5	7	3	5	5	5	5	1	3	1	5	5	4	4	5
3	1139	34	0	80	1.79	24.968	2	2	1	3	1	2	7	5	9	9	4	9	9	9	9	4	6	4	5	9	9	5	1	7	6	1	6
3	1144	25	1	82	1.7	28.3737	3	2	1	3	1	6	6	4	6	8	5	7	6	6	5	5	5	6	5	7	6	4	5	5	5	5	5
3	1145	25	0	100	1.77	31.9193	4	2	1	3	1	7	6	7	7	7	5	5	9	8	3	4	5	9	7	5	1	1	9	9	7	5	7
3	1147	27	0	83	1.72	28.0557	3	1	1	3	1	1	1	7	1	1	7	1	1	2	1	5	5	5	7	1	1	1	5	1	7	5	5
3	1149	33	1	83	1.67	29.7608	3	3	1	3	1	9	7	5	8	9	5	8	9	9	5	5	3	9	1	9	9	5	2	8	2	7	6
3	1151	30	1	80	1.61	30.863	4	2	1	2	1	9	9	5	5	9	5	9	4	9	3	5	5	7	5	9	5	5	5	6	4	5	5
3	1153	33	0	105	1.7	36.3322	4	2	0	2	0	5	5	5	5	5	6	5	3	5	5	6	6	5	6	5	5	5	5	5	6	5	6
3	1154	34	1	64	1.7	22.1453	2	2	1	1	1	6	5	5	5	8	5	5	3	5	5	5	5	5	5	3	3	3	4	1	2	5	5
3	1156	31	0	88	1.8	27.1605	3	2	0	2	1	5	5	5	5	5	5	5	6	5	5	5	5	4	5	4	5	5	5	5	6	4	6
3	1159	25	0	69	1.77	22.0243	2	3	1	3	1	6	3	8	2	7	9	2	5	6	4	8	9	2	7	5	5	5	6	6	5	6	6
3	1160	25	1	47.5	1.6	18.5547	2	3	1	1	1	3	3	5	2	4	6	2	2	3	5	6	6	4	5	2	3	3	5	4	3	2	6
3	1162	30	1	66	1.67	23.6652	2	2	0	2	0	5	6	5	5	6	5	7	4	4	3	5	5	5	5	3	3	1	5	6	5	5	5
3	1165	28	0	68	1.64	25.2826	3	2	1	2	1	9	9	6	9	9	7	9	3	9	4	6	6	6	7	9	9	1	4	5	6	3	6
3	1169	26	1	80	1.64	29.7442	3	1	1	3	1	5	5	5	3	6	5	7	9	3	5	3	7	5	4	5	5	5	5	4	5	3	6
3	1171	32	1	60	1.61	23.1473	2	1	1	2	1	3	4	5	5	3	5	5	5	1	3	5	6	5	5	2	1	3	2	3	5	2	5
3	1180	28	0	78	1.78	24.6181	2	3	1	1	1	9	9	1	6	9	1	1	1	1	6	6	5	5	4	7	7	1	1	1	4	7	7
3	1184	31	0	68	1.7	23.5294	2	2	1	2	1	5	6	4	5	5	4	5	5	6	2	4	4	5	6	4	4	2	2	2	5	5	5
3	1186	25	1	82	1.63	30.863	4	1	1	3	1	8	8	6	7	9	9	6	5	7	5	7	6	8	6	8	6	5	5	5	8	5	9
3	1188	26	1	54	1.62	20.5761	2	2	1	3	1	1	1	5	5	6	8	5	8	6	1	8	5	5	8	1	1	1	1	1	7	1	8
3	1189	28	1	67	1.67	24.0238	2	3	1	3	1	4	6	5	6	9	6	6	3	3	2	5	5	5	5	7	2	2	6	7	8	6	5
3	1190	35	0	82	1.8	25.3086	3	3	1	2	0	2	2	5	2	2	5	2	5	1	5	5	5	5	5	5	3	5	5	5	5	2	5
3	1191	30	1	112	1.68	39.6825	4	2	1	3	1	3	1	6	5	8	7	2	1	2	2	9	8	5	7	7	5	2	1	1	5	5	7
3	1194	33	1	55	1.67	19.721	2	3	1	3	1	5	5	5	4	1	9	9	7	7	8	3	1	8	8	5	5	5	5	5	5	5	9
3	1195	32	1	68	1.67	24.3824	2	3	1	2	1	2	2	6	5	5	8	4	2	2	3	6	6	5	6	3	3	2	6	1	5	5	7
3	1197	35	1	57	1.55	23.7253	2	3	1	3	1	8	7	2	7	8	8	3	2	2	1	5	5	1	8	1	1	1	1	1	8	1	8
3	1202	28	1	51	1.51	22.3674	2	2	1	2	1	7	7	3	5	6	5	5	8	3	5	5	4	5	5	6	4	5	5	5	2	3	6
3	1203	29	0	108	1.8	33.3333	4	2	0	2	1	6	6	6	5	7	6	7	5	5	7	5	5	5	7	8	5	5	5	5	5	5	7
3	1204	26	1	54	1.59	21.3599	2	1	0	2	1	8	8	5	1	3	5	2	1	8	1	5	5	5	5	1	1	1	5	3	5	5	5
3	1207	30	1	60	1.6	23.4375	2	3	1	3	1	5	5	5	5	5	5	5	5	5	3	5	5	5	5	5	3	1	5	5	5	5	5
3	1208	32	0	81	1.9	22.4377	2	3	0	2	1	5	5	5	5	5	5	5	5	5	5	6	5	5	5	5	5	5	5	5	6	5	6
3	1211	25	1	58	1.61	22.3757	2	3	1	2	1	1	1	6	5	8	5	3	3	1	6	5	5	6	5	7	2	3	5	1	5	4	6
3	1212	31	1	56	1.63	21.0772	2	3	1	2	1	6	5	5	5	6	5	5	5	6	5	5	5	6	5	5	3	5	5	4	4	5	5
3	1213	28	1	78	1.69	27.31	3	2	1	3	1	5	6	5	4	7	6	6	5	6	5	6	5	5	5	7	4	3	5	5	6	6	6
3	1215	27	0	63	1.73	21.0498	2	1	1	2	1	6	4	4	5	6	5	6	7	6	3	5	6	6	5	3	4	4	5	6	5	4	6
3	1217	29	1	50	1.54	21.0828	2	1	1	3	1	4	1	5	5	8	6	5	9	5	5	5	5	1	7	4	4	7	1	1	1	9	4
3	1221	28	1	48	1.63	18.0662	1	3	1	1	1	3	5	5	5	3	5	6	4	6	5	5	5	5	5	6	2	3	5	3	5	4	4
3	1226	27	1	55	1.64	20.4491	2	2	1	2	1	1	1	1	1	1	5	1	1	1	1	5	5	5	5	1	1	1	5	1	6	1	5
3	1227	29	0	78	1.76	25.1808	3	2	0	1	0	5	5	5	5	5	5	5	5	5	5	5	5	5	5	5	5	5	5	5	5	5	5
3	1228	28	1	58	1.6	22.6562	2	2	0	2	0	6	5	5	5	6	5	5	5	6	5	5	5	5	5	5	5	5	4	4	5	5	5
3	1229	26	1	62	1.59	24.5243	2	2	1	3	1	5	6	5	7	9	6	9	9	9	5	5	5	4	5	8	5	7	3	5	4	5	5
3	1230	30	1	58	1.53	24.7768	2	3	1	1	1	8	3	4	3	8	5	8	9	5	5	5	5	8	3	8	3	3	3	3	5	5	5
3	1231	29	1	51	1.6	19.9219	2	3	1	1	1	2	2	6	2	6	8	2	2	2	2	9	7	5	7	7	2	5	7	3	7	2	8
3	1233	28	1	65	1.65	23.8751	2	2	1	3	1	5	5	5	5	7	7	7	5	4	4	8	8	7	7	3	1	1	5	1	7	5	7
3	1235	25	1	54	1.64	20.0773	2	1	1	3	1	7	5	5	5	7	5	7	3	7	5	5	5	5	7	1	7	9	9	5	7	3	5
3	1236	28	1	65	1.61	25.0762	3	2	0	2	1	3	3	5	6	7	6	5	7	3	5	7	5	5	6	2	2	1	5	6	6	5	6
3	1238	29	1		1.64			1	1	2	1	8	7	1	9	8	4	7	5	7	5	1	5	5	5	7	6	5	5	5	5	5	5
3	1240	25	0		1.76			3	1	1	1	3	6	5	5	7	5	3	5	6	5	5	5	4	5	4	2	2	5	5	5	4	5
3	1241	29	0	60	1.72	20.2812	2	2	1	1	1	4	3	7	5	5	6	4	3	2	3	7	5	5	7	5	5	2	5	3	6	5	7
3	1242	34	0	64	1.75	20.898	2	2	1	3	1	4	5	5	5	3	5	5	4	3	6	5	5	5	5	2	3	3	5	4	5	5	5
3	1244	31	0	74	1.71	25.3069	3	2	1	3	1	2	1	5	1	2	5	6	5	3	5	5	7	5	5	1	1	5	5	3	5	2	5
3	1245	30	1	57	1.66	20.6852	2	2	1	3	1	5	5	6	5	4	7	5	5	5	4	6	6	5	6	4	3	3	7	1	6	6	6
3	1248	25	0	88	1.7	30.4498	4	2	1	3	1	9	7	5	3	9	9	6	9	1	5	5	5	9	5	5	5	5	5	5	8	5	8
3	1250	34	0	70	1.8	21.6049	2	3	1	2	0	1	3	5	5	5	5	4	3	1	5	6	6	1	5	5	5	5	5	3	5	4	5
3	1257	26	0	70	1.71	23.939	2	1	1	2	0	4	4	4	4	4	6	5	5	6	4	5	5	5	5	7	7	5	5	5	5	5	6
3	1258	30	1	49	1.65	17.9982	1	2	0	2	0	5	5	5	5	5	5	5	5	5	5	5	5	5	5	5	5	5	5	5	5	5	5
3	1259	27	0	62	1.76	20.0155	2	1	0	2	0	4	4	6	4	4	5	4	5	4	4	6	5	5	5	5	4	3	4	4	5	4	5
3	1260	35	1	54	1.68	19.1327	2	2	1	2	1	8	8	5	5	9	5	9	5	9	3	5	5	5	5	4	4	4	3	3	5	5	5
3	1261	27	0	68	1.75	22.2041	2	2	1	1	1	5	5	5	5	7	5	7	5	5	5	5	5	5	5	7	5	5	5	5	5	5	6
3	1262	28	1	57.6	1.63	21.6794	2	2	1	1	1	2	5	5	5	9	5	7	5	6	5	6	5	5	5	9	5	3	6	2	4	6	5
3	1265	30	1	57	1.6	22.2656	2	3	1	3	1	9	7	3	6	9	5	7	6	8	9	5	5	6	5	8	8	7	5	9	3	9	5
3	1270	33	1	61	1.6	23.8281	2	2	1	2	1	8	6	5	6	9	5	8	5	8	5	4	5	6	5	9	5	1	2	5	5	5	5
3	1271	29	0	96	1.72	32.45	4	2	1	3	1	8	6	5	2	9	5	8	3	1	5	5	5	7	5	4	2	2	7	1	5	3	5
3	1279	25	1	115	1.65	42.2406	4	3	1	3	1	4	5	5	5	9	9	1	1	9	1	5	8	9	9	7	9	9	5	9	5	9	9
3	1284	25	1	45	1.51	19.736	2	1	0	2	1	6	2	5	5	1	6	6	2	3	5	5	5	7	5	1	1	1	1	5	1	3	5
3	1292	30	1	59	1.58	23.634	2	2	0	2	1	5	5	2	3	9	5	9	5	6	5	4	5	5	5	7	3	3	9	9	1	5	6
3	1295	26	1	57	1.64	21.1927	2	2	1	3	1	6	5	5	6	7	5	8	6	8	5	5	5	7	5	5	5	2	5	2	6	5	6
3	1300	31	1	57	1.6	22.2656	2	2	1	2	1	5	5	6	5	2	6	5	4	4	1	5	6	3	6	1	1	1	1	1	6	1	6
3	1301	26	1	95	1.75	31.0204	4	2	1	3	1	7	8	5	6	9	5	5	7	5	5	5	5	6	5	4	7	6	5	5	5	5	7
3	1303	26	1	68	1.56	27.9421	3	1	1	3	1	7	5	5	5	9	5	5	5	1	5	5	5	5	5	5	1	1	5	1	5	5	5
3	1304	30	1	52	1.63	19.5717	2	1	1	2	1	2	2	5	5	6	5	3	3	1	5	6	5	5	5	4	2	1	5	3	5	5	5
3	1305	35	1	107	1.68	37.911	4	2	1	3	1	6	7	7	8	7	5	7	8	5	6	3	5	7	5	9	7	4	2	2	2	8	8
3	1309	25	1	62	1.56	25.4767	3	1	1	1	1	9	9	5	9	9	9	9	9	1	5	5	5	9	5	9	9	9	1	9	5	9	5
3	1311	33	1	63	1.77	20.1092	2	3	1	2	1	5	5	5	5	7	5	5	4	4	5	6	7	6	5	4	3	3	5	5	7	5	6
3	1312	29	1	59	1.66	21.4109	2	3	1	3	1	3	3	9	5	9	6	5	2	1	1	9	5	4	4	9	5	1	1	1	5	5	9
3	1313	25	1	73	1.56	29.9967	4	2	1	2	1	7	7	5	7	7	5	6	3	2	5	5	5	5	5	3	3	1	5	1	5	3	6
3	1316	32	1	55	1.63	20.7008	2	2	1	1	1	7	4	6	4	9	8	2	9	8	8	3	2	8	3	7	9	5	5	9	9	6	5
3	1317	26	1	78	1.68	27.6361	3	2	1	3	1	6	6	4	6	8	8	7	5	6	3	6	6	8	7	3	5	3	7	7	3	6	7
3	1319	30	1	68	1.64	25.2826	3	2	1	3	1	7	5	5	5	8	5	8	6	5	5	5	5	3	5	6	5	5	5	5	4	7	5
3	1320	30	1	71	1.63	26.7229	3	2	1	2	1	5	6	5	5	7	5	5	5	5	5	5	5	5	5	7	6	3	5	3	5	5	6
3	1321	34	0	78	1.77	24.8971	2	2	1	2	1	2	5	6	3	8	6	5	8	2	2	7	7	5	5	8	8	2	7	2	5	8	5
3	1322	27	1	85	1.62	32.3884	4	2	1	3	1	3	5	5	5	8	5	5	5	6	5	5	5	5	5	6	5	2	5	2	5	5	5
3	1325	30	1	50	1.57	20.2848	2	2	1	3	1	3	4	5	4	6	5	4	6	3	5	5	5	5	5	4	3	2	5	2	5	4	5
3	1327	27	1	51	1.64	18.9619	2	2	1	3	1	4	4	5	4	7	7	3	5	3	3	7	7	5	6	3	3	5	5	5	7	5	5
3	1328	35	1	57	1.64	21.1927	2	3	1	2	1	4	7	5	6	9	5	7	6	6	6	5	5	6	5	9	6	4	4	4	4	7	5
3	1329	32	0	74	1.81	22.5878	2	2	0	1	1	3	4	6	2	3	7	4	5	4	3	8	6	6	7	2	2	3	6	4	7	5	6
3	1330	34	0	104	1.93	27.9202	3	2	1	3	1	9	9	5	5	9	5	6	7	5	5	5	5	8	5	9	5	5	5	5	8	5	5
3	1331	27	0	74	1.69	25.9095	3	2	1	3	1	7	7	2	5	7	5	7	7	7	5	5	3	3	3	6	6	5	5	5	3	6	3
3	1332	26	1	59.9	1.58	23.9946	2	3	0	2	1	7	7	5	8	7	6	6	6	7	3	6	6	7	7	4	3	1	3	2	3	6	6
3	1334	32	0	106	1.81	32.3555	4	3	1	3	1	5	6	6	5	8	8	5	5	5	5	5	5	5	6	6	5	5	5	5	5	5	5
3	1338	33	1	53	1.51	23.2446	2	2	1	3	1	5	7	3	5	7	5	7	5	7	5	5	5	5	5	5	7	7	4	7	3	7	7
3	1339	32	1	60	1.72	20.2812	2	3	1	1	1	3	3	5	5	2	5	3	7	2	1	5	6	6	6	2	2	1	6	2	6	3	5
3	1340	32	0	84	1.74	27.7447	3	2	1	3	1	2	1	5	6	8	5	3	8	5	2	2	8	5	6	3	2	1	1	1	1	3	3
3	1341	31	1	85	1.65	31.2213	4	3	1	1	1	7	9	4	5	8	7	9	5	5	3	6	6	5	7	4	4	6	5	5	7	7	7
3	1342	31	1	80	1.7	27.6817	3	3	1	3	1	8	9	5	6	9	5	9	7	2	4	7	7	8	5	7	6	1	5	2	6	5	8
3	1343	31	1	75	1.72	25.3515	3	2	1	2	1	3	7	5	7	9	4	7	7	8	5	4	3	6	5	5	4	3	3	4	4	7	5
3	1344	33	1	75	1.7	25.9516	3	3	1	3	1	9	2	5	1	8	5	5	8	8	5	5	5	8	8	1	1	1	1	1	9	9	5
3	1345	30	1	53	1.63	19.9481	2	3	1	1	1	7	7	4	6	9	5	4	8	9	6	3	5	8	2	3	1	1	5	1	7	4	5
3	1346	26	1	85	1.72	28.7317	3	2	1	1	1	1	7	5	7	1	8	6	4	1	3	7	8	5	7	7	4	2	9	1	5	7	5
3	1349	25	1	80	1.66	29.0318	3	1	1	2	1	6	5	4	6	7	5	6	3	6	5	6	5	3	5	3	5	3	6	5	7	3	7
3	1354	28	1	65	1.67	23.3067	2	2	1	3	1	6	5	6	5	7	6	6	5	5	5	6	5	5	5	5	5	4	5	4	5	5	5
3	1358	26	1	54	1.63	20.3244	2	2	1	2	1	4	4	6	5	6	6	5	6	4	2	5	5	5	6	4	3	2	6	3	6	4	7
3	1359	30	1	63	1.73	21.0498	2	2	1	2	1	7	6	5	7	7	4	6	6	6	5	5	5	5	5	7	5	5	4	6	4	6	5
3	1360	25	0	159	1.94	42.2468	4	3	1	3	1	7	6	5	5	9	7	5	5	5	5	7	5	7	7	7	6	5	5	5	5	6	5
3	1361	33	1	48.6	1.56	19.9704	2	2	0	2	1	3	3	5	3	3	5	3	4	3	2	5	5	5	5	5	2	5	5	3	5	5	5
3	1362	29	1	58	1.6	22.6562	2	1	1	2	1	7	7	5	5	8	5	6	5	7	5	5	5	7	5	5	3	4	5	6	5	4	5
3	1363	26	1	74	1.72	25.0135	3	2		3	1	4	4	5	4	3	5	4	4	6	4	5	5	5	5	5	4	3	5	4	5	4	6
3	1364	32	1	65	1.76	20.984	2	3	0	2	1	5	5	5	5	5	5	5	6	5	5	5	5	5	5	5	3	4	5	5	4	5	5
3	1365	26	1	85	1.72	28.7317	3	2	1	1	1	1	7	5	7	1	8	6	4	1	3	7	8	5	7	7	4	2	9	1	5	7	5
3	1366	34	1	70	1.73	23.3887	2	2	1	3	1	4	7	5	5	9	5	6	9	5	9	3	5	7	5	3	5	5	5	5	6	5	5
3	1367	33	0	85	1.72	28.7317	3	2	1	3	1	9	9	5	1	1	5	9	6	9	1	6	5	9	5	1	1	1	5	1	4	5	5
3	1368	30	1	74	1.72	25.0135	3	1	1	3	1	4	5	7	5	9	7	4	2	3	5	6	6	5	7	6	2	1	5	3	5	7	5
3	1369	31	0	79	1.81	24.114	2	3	1	1	1	1	1	5	2	2	5	2	1	1	1	5	5	5	5	5	1	1	1	1	5	5	5
3	1370	26	1	55	1.55	22.8928	2	3	1	1	1	3	5	5	5	7	5	6	3	2	3	6	5	1	5	3	1	3	5	3	6	5	5
3	1372	26	0	69	1.75	22.5306	2	2	1	1	1	5	5	5	5	5	6	6	5	5	5	9	5	5	5	1	1	1	5	4	7	1	6
3	1373	27	1	55	1.57	22.3133	2	2	1	3	1	7	7	6	4	8	5	5	7	6	4	5	5	7	5	6	5	6	5	4	5	7	5
3	1374	29	1	60	1.73	20.0474	2	2	1	2	1	1	1	6	6	2	7	5	6	3	2	7	6	7	5	3	3	1	5	5	6	3	7
3	1375	28	1	66	1.65	24.2424	2	2	1	3	1	1	5	5	5	7	5	5	5	3	5	5	5	4	5	5	5	2	5	5	6	2	6
3	1376	27	1	107	1.7	37.0242	4	3	0	3	1	3	8	6	3	9	7	9	6	1	3	7	6	7	5	7	3	3	3	2	7	2	7
3	1377	27	1	53	1.61	20.4467	2	2	1	1	1	7	5	5	8	9	5	8	5	3	5	5	5	7	5	9	1	1	5	1	5	8	7
3	1378	33	1	71	1.75	23.1837	2	2	1	1	1	3	6	5	6	7	5	4	5	2	2	5	5	3	5	6	6	2	3	7	5	5	5
3	1379	28	0	81	1.8	25	3	2	1	2	1	5	5	5	5	9	8	7	5	8	8	9	5	5	5	3	3	3	5	5	5	3	8
3	1380	26	1	52	1.55	21.6441	2	1	1	3	1	9	6	1	6	9	2	8	3	3	3	1	1	7	2	9	2	5	5	2	1	5	5
3	1381	34	1	56	1.63	21.0772	2	2	1	3	1	6	6	5	5	6	5	6	4	4	4	6	5	5	5	2	4	2	5	4	5	3	6
3	1384	28	0	81	1.81	24.7245	2	2	0	2	1	3	3	5	3	3	5	3	2	3	2	6	6	5	7	3	3	1	5	5	5	4	5
3	1385	25	1	59	1.63	22.2063	2	1	1	1	1	4	5	6	5	7	5	6	5	5	5	5	6	5	5	6	4	1	5	5	6	3	6
3	1386	35	0	80	1.7	27.6817	3	2	1	3	1	5	6	4	8	9	5	3	6	6	4	1	3	6	3	6	7	6	4	7	3	9	3
3	1387	35	1	59	1.6	23.0469	2	2	1	2	1	4	2	5	2	6	5	3	7	4	2	2	2	7	2	2	2	2	2	2	4	2	6
3	1388	26	1	65	1.65	23.8751	2	1	1	3	1	9	9	5	9	9	6	9	9	9	9	6	5	9	5	9	9	9	6	9	5	9	5
3	1389	27	1	48	1.6	18.75	2	2	1	2	1	6	6	5	5	6	6	6	3	5	5	6	6	5	5	3	3	3	7	3	3	3	7
3	1391	33	1	57	1.68	20.1956	2	3	1	3	1	8	7	5	5	9	6	6	4	7	5	6	5	6	6	7	5	5	5	5	5	5	6
3	1392	27	1	60	1.6	23.4375	2	2	0	2	1	4	5	5	5	7	5	6	3	3	3	5	6	6	6	4	4	3	6	6	4	3	5
[truncated: 244 more rows]

## Sheet: EMAQ TFEQ Sample 1
Sample	EMAQ1	EMAQ2	EMAQ3	EMAQ4	EMAQ5	EMAQ6	EMAQ7	EMAQ8	EMAQ9	EMAQ10	EMAQ11	EMAQ12	EMAQ13	EMAQ14	EMAQ15	EMAQ16	EMAQ17	EMAQ18	EMAQ19	EMAQ20	EMAQ21	EMAQ22	TFEQ1	TFEQ2	TFEQ3	TFEQ4	TFEQ5	TFEQ6	TFEQ7	TFEQ8	TFEQ9	TFEQ10	TFEQ11	TFEQ12	TFEQ13	TFEQ14	TFEQ15	TFEQ16	TFEQ17	TFEQ18
1	8	8	5	6	9	9	9	4	8	5	5	5	9	5	9	8	5	5	5	5	7	5	4	1	4	3	2	3	3	2	2	3	2	2	3	3	2	3	4	2
1	2	6	5	6	5	7	1	1	1	2	6	7	1	8	1	1	1	9	1	8	1	8	1	3	1	3	1	1	1	2	2	2	3	4	1	2	3	3	2	5
1	2	2	5	3	1	5	1	2	2	2	5	5	6	6	1	1	1	5	5	5	5	5	3	2	2	4	3	2	3	2	2	2	1	1	2	2	1	2	2	6
1	8	5	5	5	9	9	5	5	5	5	5	3	9	5	8	5	2	2	9	2	5	5	4	2	3	2	2	3	1	3	3	3	2	2	2	2	3	2	3	4
1	8	8	5	9	9	2	5	2	6	2	5	5	5	5	8	4	8	4	4	4	4	3	4	3	3	2	3	1	3	3	4	2	1	1	4	4	3	2	4	2
1	7	7	5	7	7	5	7	3	8	4	5	5	8	5	7	7	2	5	5	5	5	5	3	1	3	3	3	3	3	3	3	1	1	1	4	3	3	2	4	3
1	1	3	6	6	9	9	3	5	3	5	6	8	5	7	3	4	2	7	2	6	3	7	3	1	3	3	3	1	2	4	3	2	3	2	3	3	2	1	3	3
1	3	6	5	5	4	5	2	3	3	8	9	5	9	6	2	5	1	5	5	4	3	9	2	1	4	3	2	3	4	4	2	4	1	1	3	4	3	2	2	3
1	5	3	5	2	5	5	5	3	5	5	5	5	6	6	5	5	2	5	5	2	5	5	1	1	1	2	2	1	2	3	2	2	2	2	1	4	1	2	3	3
1	3	7	5	5	9	7	7	5	7	2	5	5	3	7	3	3	3	5	5	7	5	5	3	1	4	4	3	1	3	3	2	2	2	1	3	2	2	2	3	1
1	1	3	8	5	1	9	4	6	2	2	8	8	7	8	2	2	1	5	1	6	1	8	2	1	1	2	1	1	3	1	2	2	1	1	1	3	1	3	1	1
1	9	9	5	1	9	5	9	5	1	1	5	1	1	5	5	1	1	5	9	5	1	5	1	1	3	3	4	4	1	4	4	3	1	2	2	4	1	1	3	4
1	3	3	5	3	2	5	3	3	2	3	5	5	4	5	2	3	2	5	4	5	4	5	1	3	1	1	1	1	1	1	1	1	3	2	1	2	3	3	1	4
1	9	9	5	9	9	5	9	7	9	6	5	5	5	6	9	7	5	5	8	4	6	5	2	3	2	2	3	3	2	3	3	3	2	2	3	3	1	1	3	1
1	6	6	5	6	6	5	6	6	6	5	5	5	5	5	4	2	4	5	3	5	5	5	2	3	4	2	2	3	3	2	1	2	3	2	1	2	1	3	2	1
1	6	6	5	6	8	6	7	5	7	6	3	5	6	5	8	7	6	6	7	5	7	6	2	1	4	3	3	3	4	1	4	3	3	3	3	3	3	2	3	4
1	7	7	5	5	7	5	7	5	7	3	5	5	7	5	3	3	1	5	5	7	7	5	2	2	3	3	1	4	3	2	3	3	2	2	3	2	1	1	3	4
1	4	4	2	6	8	7	4	2	4	5	5	5	8	5	5	7	2	5	5	3	5	5	1	2	4	3	2	2	3	4	3	3	3	4	3	2	4	4	4	4
1	9	9	5	5	9	5	6	4	5	1	5	5	4	5	9	1	9	4	9	5	1	5	1	4	4	3	3	4	3	3	1	2	4	4	2	2	4	4	3	7
1	9	2	5	2	9	5	2	2	6	2	5	5	8	5	7	5	2	5	5	5	5	5	4	4	4	1	1	3	3	1	1	3	3	1	2	2	2	4	4	6
1	9	5	5	6	9	5	6	2	9	2	5	5	9	5	3	7	9	5	9	1	2	5	1	2	3	3	2	4	2	2	1	3	2	1	2	2	3	3	2	1
1	7	5	4	7	8	5	7	4	1	1	5	5	9	5	8	8	5	4	8	5	4	7	3	2	4	3	4	4	3	3	3	3	2	2	3	3	3	3	4	3
1	6	5	5	5	3	7	8	3	7	4	5	5	6	5	6	5	4	5	5	7	5	5	2	1	2	1	2	3	3	2	1	3	1	1	2	2	3	1	2	2
1	6	6	5	5	7	7	5	5	5	5	5	5	5	5	5	5	5	5	5	5	5	5	2	3	3	1	1	2	2	2	1	1	4	4	2	3	4	4	2	6
1	9	9	7	7	9	6	9	6	8	3	4	5	8	5	8	2	2	5	8	5	4	4	2	1	4	2	2	3	3	2	3	3	1	1	3	3	2	2	3	2
1	9	9	5	1	8	8	7	5	8	1	1	5	9	4	3	9	9	9	2	4	9	9	4	1	4	4	2	4	4	3	3	4	2	1	4	3	1	2	3	3
1	7	7	5	5	9	7	7	5	7	5	5	5	7	5	5	5	5	5	5	5	5	7	2	2	4	3	4	4	4	4	4	3	3	1	3	3	4	2	3	2
1	6	6	5	6	6	6	4	4	4	4	6	5	5	6	5	4	2	6	5	6	4	6	1	3	3	2	1	2	2	2	1	2	3	2	1	2	2	2	1	3
1	6	5	5	5	8	5	5	3	6	5	5	5	6	5	5	5	4	6	6	7	5	5	1	1	4	4	2	2	3	3	2	2	1	1	2	2	1	1	2	3
1	9	9	3	9	7	5	9	2	7	2	5	5	3	5	9	3	3	5	3	3	3	7	3	2	3	4	3	4	2	4	3	1	2	2	3	3	3	2	3	4
1	3	3	5	6	9	5	3	4	2	5	5	5	5	5	5	4	2	5	2	5	3	5	2	1	3	2	2	1	2	4	4	2	2	1	2	2	2	2	2	3
1	9	6	3	2	9	5	2	2	9	2	5	5	1	5	9	3	8	5	7	2	2	5	3	2	3	4	2	3	3	3	2	2	2	2	2	3	2	2	3	1
1	2	3	7	3	8	8	5	1	3	3	8	8	8	7	5	5	4	6	1	6	1	5	3	2	3	3	2	1	2	3	2	2	2	2	2	2	2	2	3	6
1	2	8	8	8	8	8	7	7	1	2	9	6	4	9	8	6	2	7	1	6	9	9	3	1	3	3	2	3	2	3	2	3	1	1	2	3	1	2	2	1
1	2	6	3	3	9	6	1	4	1	1	7	6	1	1	2	1	1	6	1	5	5	6	3	2	3	4	4	1	4	4	3	2	1	1	3	3	2	2	3	5
1	5	5	5	5	5	5	5	5	5	5	5	5	5	5	5	5	2	5	5	5	1	5	3	4	2	1	1	1	2	4	4	1	3	3	4	3	3	3	2	1
1	6	6	5	1	1	5	1	1	1	5	5	5	1	5	2	1	5	5	2	6	5	7	2	2	2	4	2	1	2	2	2	2	2	2	3	1	1	1	3	3
1	5	7	5	7	9	5	6	5	6	5	8	5	5	5	6	5	3	5	6	4	8	5	1	1	3	1	2	2	1	2	2	2	1	1	1	1	2	2	2	3
1	7	5	5	5	2	6	5	5	5	7	5	6	8	5	5	5	1	5	4	5	5	5	2	1	3	1	1	2	2	1	2	1	1	1	1	2	1	2	1	3
1	5	5	5	3	1	5	2	5	1	5	5	5	7	5	1	4	2	5	1	5	5	8	1	1	3	1	1	2	2	2	2	3	1	1	1	2	3	3	1	2
1	4	7	6	7	6	7	8	5	6	5	5	5	5	6	3	3	3	6	2	7	6	6	2	2	3	3	2	2	3	3	3	3	2	2	3	4	2	3	2	6
1	2	3	6	5	9	6	4	4	3	4	7	6	4	6	4	4	2	5	5	4	3	6	2	2	3	3	3	1	3	2	2	2	2	2	1	2	3	2	3	3
1	6	6	5	5	6	5	6	4	6	5	5	5	5	5	6	5	5	5	5	5	6	5	2	2	3	2	2	4	1	3	3	2	2	2	3	2	3	3	3	4
1	4	4	5	4	6	5	5	5	4	5	5	5	5	5	5	4	4	5	4	5	5	5	1	3	3	1	2	1	1	1	1	1	3	1	2	4	3	4	3	1
1	8	5	5	6	9	6	7	8	8	5	5	4	7	7	4	5	6	5	7	5	5	5	4	3	3	3	2	2	2	2	2	3	3	2	1	2	3	2	2	4
1	6	3	3	5	7	5	7	4	4	5	5	4	7	5	7	4	3	5	4	5	6	6	3	1	3	4	4	4	2	4	2	3	1	2	2	2	3	3	2	3
1	3	3	5	6	9	7	2	2	1	5	6	5	3	5	7	3	2	6	1	1	5	6	4	1	1	1	2	1	3	4	3	2	1	1	3	3	2	2	4	1
1	1	4	5	4	7	5	4	5	4	5	5	5	5	5	7	4	1	4	4	5	4	5	4	4	1	4	4	1	2	2	2	1	2	1	2	2	1	2	3	2
1	4	4	5	4	4	5	4	4	4	4	5	5	4	7	9	6	4	7	4	7	4	4	4	4	4	4	4	4	4	4	4	4	4	4	4	4	2	2	2	1
1	3	3	5	4	2	5	2	2	3	3	5	5	5	5	3	3	2	5	5	4	4	5	4	1	1	2	2	2	2	2	2	3	1	1	2	2	4	4	1	2
1	9	6	5	7	9	7	7	5	9	5	5	5	9	5	6	4	5	5	9	5	6	5	3	3	4	2	2	3	4	2	2	3	1	1	2	2	1	2	2	2
1	5	4	5	5	7	5	4	7	5	5	5	5	7	5	5	5	5	5	5	5	5	6	2	1	3	1	1	1	3	3	2	1	1	1	1	2	2	1	1	2
1	4	4	5	5	5	6	4	5	4	5	5	5	7	5	4	5	2	5	5	5	4	5	4	1	3	4	4	3	4	4	4	2	1	1	4	4	1	1	4	1
1	8	5	5	2	8	7	2	2	7	5	5	5	5	5	8	5	5	7	9	8	5	7	1	1	1	1	1	3	2	3	3	2	1	1	3	3	1	2	3	1
1	7	6	5	5	9	6	5	5	9	5	5	5	6	6	7	5	5	5	3	5	3	5	1	1	4	4	4	4	4	4	4	3	1	1	4	4	2	1	4	1
1	4	4	5	6	7	7	4	2	2	5	7	7	5	7	6	5	4	7	7	5	5	5	4	2	4	2	3	4	3	2	3	3	2	2	4	4	2	2	3	1
1	4	5	1	1	7	5	5	5	3	5	5	5	5	5	2	1	1	5	4	5	1	5	2	4	4	1	1	1	3	1	1	4	3	1	1	1	4	2	1	6
1	2	2	2	4	8	7	2	2	4	2	6	3	2	3	1	1	1	1	4	5	1	5	2	4	3	1	1	1	1	2	2	1	1	1	3	3	1	3	3	1
1	6	5	5	3	7	5	5	5	6	2	6	6	8	5	6	2	2	4	2	8	5	7	3	2	4	3	3	3	4	3	4	2	1	1	3	4	2	2	4	3
1	8	7	5	5	9	5	6	3	7	5	5	5	5	5	6	5	5	5	8	5	1	5	2	2	3	2	2	3	2	3	2	2	3	2	2	4	4	3	3	5
1	2	2	6	5	9	7	6	3	1	2	7	7	9	5	9	2	1	5	4	7	5	7	2	2	4	2	1	1	1	4	3	4	3	2	4	4	3	2	3	6
1	1	5	5	5	9	5	5	3	1	3	5	5	1	5	3	1	1	7	1	5	5	5	3	3	4	3	2	1	2	3	1	1	2	3	4	1	2	2	1	1
1	5	5	6	6	6	5	5	3	5	3	5	5	5	6	3	5	3	5	3	3	3	5	3	2	1	1	1	3	2	1	1	1	3	1	1	2	2	3	3	4
1	3	3	5	4	1	7	5	5	1	4	5	7	8	8	1	1	1	4	2	7	5	7	1	3	1	4	2	1	2	2	2	3	3	2	1	3	1	3	2	3
1	3	6	5	6	8	5	5	4	7	5	5	5	4	5	7	6	5	5	5	8	5	6	2	2	4	2	1	2	3	3	2	1	3	2	2	3	3	2	2	3
1	2	4	5	4	2	7	4	5	4	4	6	5	5	6	3	2	2	7	2	6	4	5	2	2	4	2	3	1	3	3	3	2	3	3	3	3	2	3	3	3
1	7	7	5	5	7	8	5	6	6	6	8	5	6	8	8	5	5	7	5	8	5	5	2	2	2	3	2	2	3	3	2	2	2	1	2	2	3	2	3	1
1	5	5	6	4	7	5	4	4	5	4	5	6	5	5	5	5	4	5	5	5	4	6	3	1	2	1	1	2	1	1	1	1	1	1	1	1	2	2	1	4
1	9	6	5	6	9	7	2	3	5	1	5	5	9	6	7	3	5	6	6	5	9	9	2	1	2	4	4	4	1	1	2	1	1	1	4	3	1	4	1	3
1	2	2	7	4	9	9	3	2	1	5	7	5	5	5	9	5	2	6	9	5	5	5	1	3	4	2	1	1	2	3	1	1	4	4	2	2	2	4	1	4
1	2	5	5	3	7	5	5	3	5	3	6	5	4	5	3	2	2	5	3	6	2	5	3	2	2	3	1	2	2	3	2	2	2	1	3	3	2	3	2	2
1	8	8	6	7	8	5	7	5	7	5	5	5	6	5	7	5	6	5	6	5	6	6	3	4	3	3	3	3	3	4	4	2	3	4	3	3	3	3	4	3
1	8	4	5	3	9	7	8	5	5	5	5	5	7	7	8	4	5	5	5	5	5	5	2	3	3	2	2	3	2	2	2	3	3	1	2	3	4	3	3	3
1	6	6	5	5	6	5	5	4	5	4	5	5	6	5	5	5	4	5	5	5	4	6	2	3	4	2	2	3	2	2	2	3	3	3	2	2	4	2	3	5
1	1	4	5	6	8	5	5	5	1	5	5	5	7	5	8	6	1	3	3	5	5	5	3	3	3	1	3	1	3	4	3	3	2	2	3	4	2	3	3	2
1	7	5	5	5	7	5	5	5	5	5	5	5	5	5	5	5	3	3	5	7	5	6	1	3	3	1	1	1	3	2	1	2	3	2	2	2	1	3	2	2
1	4	4	1	2	7	1	8	5	6	1	1	1	3	2	1	1	2	3	1	2	4	5	2	3	3	4	2	2	2	2	2	2	3	2	3	3	2	3	2	4
1	8	8	8	3	8	8	5	2	5	7	7	3	3	3	5	5	8	8	2	5	3	8	1	2	4	3	1	2	2	1	4	1	2	1	3	4	4	3	1	1
1	5	5	3	6	7	5	7	7	7	7	5	5	5	6	9	8	6	4	3	5	8	5	4	1	4	3	3	1	2	3	2	1	2	1	2	3	2	1	2	3
1	8	8	5	3	9	5	8	5	8	3	5	5	8	5	7	8	4	6	2	5	5	5	3	1	3	3	3	3	2	3	3	4	1	1	4	3	1	2	3	3
1	5	5	5	5	6	6	5	5	5	5	7	6	5	5	4	5	5	5	5	3	5	6	2	2	3	3	3	2	3	2	2	1	1	3	3	2	4	2	3	1
1	3	3	5	3	8	5	3	3	3	5	8	5	5	5	7	5	5	5	5	5	5	7	2	3	4	3	3	2	2	3	2	2	3	3	2	2	3	3	2	5
1	7	7	5	5	8	7	7	6	6	5	5	5	5	5	7	5	6	5	7	6	6	7	1	3	2	1	1	2	2	2	4	1	3	3	1	3	4	3	2	6
1	2	2	5	2	9	7	7	3	3	1	6	5	7	4	1	1	1	5	3	3	1	7	4	3	4	4	4	2	3	4	3	3	2	2	4	3	3	3	3	3
1	3	3	3	7	9	5	7	7	7	2	5	4	9	5	7	4	2	5	2	5	7	5	1	3	4	1	2	1	3	2	1	3	3	3	2	2	4	4	3	7
1	1	1	5	3	9	9	9	1	1	1	5	4	9	5	1	1	1	1	1	1	1	9	4	3	4	4	4	2	3	4	4	4	1	1	4	4	1	1	3	1
1	7	3	3	5	6	4	6	6	9	5	6	5	7	5	8	5	2	5	7	5	7	5	2	3	3	3	2	3	3	2	3	3	3	3	2	3	3	2	2	5
1	7	5	8	5	9	9	5	2	3	5	7	5	8	7	5	5	1	5	5	7	4	5	4	1	4	4	4	3	3	4	4	3	2	1	3	4	1	2	3	1
1	6	5	9	5	9	9	4	2	1	1	8	8	9	8	1	1	1	3	2	7	1	9	2	1	4	4	1	1	3	2	1	3	3	3	1	2	3	2	1	3
1	3	3	5	5	5	7	5	3	7	5	5	5	3	5	7	5	1	5	3	5	5	7	2	3	3	3	1	3	2	2	3	1	3	1	2	3	3	2	1	6
1	7	7	5	8	8	7	7	5	7	5	5	5	8	5	7	5	5	7	5	7	5	6	4	1	3	3	3	3	2	3	2	3	1	1	3	3	2	1	3	1
1	2	2	5	6	3	5	7	7	3	3	5	5	3	5	4	2	1	5	1	5	1	5	2	2	2	2	2	1	3	3	2	2	2	2	2	2	2	3	2	3
1	1	7	4	5	5	7	8	5	9	3	5	5	7	7	3	9	7	5	5	5	1	7	4	3	1	2	3	4	2	3	2	3	3	3	2	2	2	3	3	4
1	7	4	5	5	6	5	4	3	5	5	5	5	5	5	5	5	5	5	6	6	4	5	4	3	3	4	2	3	2	3	1	4	3	2	3	3	3	2	3	4
1	5	5	5	5	7	8	4	3	8	5	5	5	7	5	3	2	2	5	5	9	4	5	1	2	3	1	1	2	1	1	1	1	2	2	1	2	1	4	1	4
1	4	3	1	5	9	1	6	1	9	1	1	1	2	1	6	5	9	3	9	2	1	4	1	4	4	3	3	3	1	4	2	2	4	4	2	1	4	4	2	7
1	7	5	5	5	2	5	2	5	2	2	6	5	5	5	1	2	2	5	2	6	2	7	4	3	3	3	2	3	2	2	2	2	3	2	1	2	3	3	3	4
1	4	3	5	3	8	5	4	4	3	3	5	5	6	6	3	2	3	4	2	5	5	5	2	1	3	3	2	1	2	2	2	3	2	1	2	2	3	3	3	4
1	1	5	5	4	8	9	1	1	1	1	6	5	7	5	5	1	5	7	5	6	1	7	4	1	2	1	2	1	4	4	2	1	1	1	4	2	1	1	2	1
1	3	3	5	5	2	5	4	3	2	4	5	5	6	5	3	4	3	5	4	5	4	5	1	3	1	3	2	1	1	1	1	2	3	3	2	2	3	3	1	6
1	6	3	4	3	7	3	7	3	7	5	3	2	6	2	3	3	2	4	6	4	5	3	2	3	3	2	2	3	2	2	3	2	3	3	2	3	4	2	2	4
1	7	4	5	5	8	5	8	5	7	7	5	5	5	5	7	7	4	5	3	5	3	5	4	1	4	3	4	4	3	4	2	2	1	1	3	4	2	2	3	4
1	2	3	3	2	2	8	5	3	3	5	5	5	5	6	3	2	2	5	4	6	4	6	2	2	1	3	1	4	3	2	2	2	2	2	1	2	2	2	1	4
1	4	4	5	6	6	5	6	7	7	4	6	6	6	5	6	4	4	4	5	5	4	5	4	2	3	2	2	2	3	3	3	3	2	2	3	3	2	3	3	5
1	5	6	2	6	9	5	7	5	6	1	5	5	9	5	9	7	4	5	5	5	5	5	2	1	4	3	2	1	2	1	1	2	2	2	1	2	3	3	2	5
1	5	4	5	4	4	5	5	5	5	5	5	5	4	5	5	4	5	4	3	5	5	5	2	3	2	2	2	1	2	2	2	1	3	2	2	2	2	3	1	7
1	6	6	5	6	5	3	6	5	6	2	5	5	6	5	5	6	2	4	5	4	4	6	2	2	2	3	2	3	2	2	3	3	3	2	2	2	4	3	2	5
1	8	4	4	8	5	2	9	2	4	4	5	5	9	5	9	3	5	8	8	3	8	5	4	2	4	3	3	4	3	4	4	3	1	1	3	3	2	1	3	3
1	9	5	5	5	5	5	5	5	9	5	5	5	5	5	1	5	5	5	5	6	5	5	2	1	4	3	1	3	2	4	2	2	1	1	2	3	4	2	2	3
1	5	7	5	7	8	5	8	7	8	5	5	5	7	8	8	6	5	5	7	5	7	5	4	2	4	3	2	3	3	3	3	3	2	1	3	3	2	2	3	3
1	7	1	5	1	7	5	6	4	6	3	5	5	5	5	6	2	6	5	3	5	3	5	4	2	3	3	1	4	2	2	2	3	1	1	2	2	4	3	1	4
1	7	5	5	5	8	5	4	4	3	5	5	5	5	5	5	1	3	5	1	5	5	5	4	3	4	3	2	2	3	3	1	2	3	2	2	2	2	4	2	4
1	5	5	5	3	7	8	8	9	9	2	9	5	7	7	9	2	2	9	9	9	2	7	1	1	4	2	2	4	3	3	3	3	1	1	2	3	1	3	3	3
1	1	9	5	2	9	6	6	9	9	1	5	5	6	5	1	1	1	9	9	5	1	9	1	1	4	2	1	1	1	1	2	3	1	2	2	2	3	3	1	1
1	5	5	5	5	5	5	5	3	4	5	5	5	5	5	6	5	5	5	5	4	4	5	4	3	2	3	2	2	2	4	3	1	3	4	3	3	4	1	3	6
1	1	5	8	6	4	8	4	3	3	2	8	8	8	8	2	2	1	5	1	8	1	7	1	1	1	2	1	1	2	1	1	2	1	1	1	3	1	1	2	1
1	5	5	5	5	5	7	5	5	5	5	5	5	8	5	7	5	5	5	5	7	5	5	4	3	2	2	2	1	1	1	2	3	3	3	1	2	1	2	2	5
1	5	5	5	5	5	5	5	5	5	5	5	5	7	5	5	5	5	7	5	5	5	5	1	1	3	3	2	2	2	2	2	3	2	1	1	2	3	2	1	3
1	9	9	7	1	9	5	9	2	2	5	9	5	9	5	9	9	5	5	5	5	3	5	4	2	4	3	2	3	2	2	2	2	2	2	3	2	2	1	3	3
1	7	7	5	4	7	5	7	5	7	3	6	5	6	5	4	4	4	5	7	5	7	5	2	1	3	2	1	3	2	1	3	2	1	1	2	2	2	1	2	1
1	5	6	5	5	7	5	5	4	4	5	3	5	4	6	6	4	3	5	5	5	5	5	1	1	3	3	1	2	2	2	3	2	1	1	3	3	2	1	3	1
1	2	2	3	4	9	7	3	2	1	2	7	5	9	9	9	7	1	5	1	5	3	9	4	2	4	4	3	1	2	3	3	3	3	3	3	2	2	3	3	3
1	5	5	5	7	7	5	8	5	4	5	5	5	5	5	3	3	2	5	5	5	5	5	2	1	2	1	1	1	2	3	2	1	1	1	3	2	1	1	1	1
1	6	4	5	5	5	6	5	4	5	6	7	6	5	6	4	5	1	5	9	6	9	6	4	2	2	3	2	3	3	3	2	3	2	1	2	2	3	3	2	1
1	2	6	5	4	9	6	9	4	2	2	6	5	6	5	1	3	2	4	1	6	4	6	2	4	4	3	3	3	2	3	2	3	4	4	3	3	3	3	3	4
1	3	3	5	5	2	5	4	2	2	2	5	5	6	5	2	3	1	2	1	6	3	5	1	1	1	2	1	2	3	2	2	2	1	1	1	2	1	3	1	1
1	3	3	5	8	8	5	3	1	3	5	5	5	6	6	8	3	1	5	2	5	2	5	4	2	3	3	2	1	2	3	3	3	2	2	3	3	2	2	3	3
1	7	7	5	7	9	5	7	5	9	5	5	5	5	5	8	5	5	5	5	5	5	5	2	3	4	2	2	2	2	2	3	2	3	2	2	2	3	2	3	5
1	2	2	5	2	9	5	2	5	1	5	5	5	5	5	1	1	1	7	1	5	2	5	1	3	4	1	1	1	1	2	1	1	3	1	1	1	4	3	1	5
1	3	3	7	8	3	8	3	1	3	1	8	8	9	8	3	3	3	1	3	8	5	8	4	4	2	3	2	1	2	2	2	3	3	3	2	2	3	4	3	4
1	4	3	5	4	8	5	4	5	4	5	5	5	6	5	4	3	1	7	4	5	5	6	2	3	1	2	1	2	3	2	2	3	3	3	2	3	3	2	3	5
1	8	8	5	3	9	6	7	8	8	2	5	5	9	6	8	8	8	6	6	3	4	7	2	3	4	3	4	4	3	3	4	4	3	3	2	2	3	3	3	5
1	6	5	5	5	7	7	4	6	5	4	5	5	6	6	6	4	3	5	5	5	4	6	1	3	3	2	2	3	2	3	3	3	3	2	2	3	3	2	2	5
1	5	6	5	5	5	5	5	5	5	6	5	5	5	5	4	4	4	5	5	4	4	5	1	1	1	1	1	1	1	1	1	1	2	1	1	2	3	2	2	6
1	9	1	9	9	1	9	1	1	1	1	5	5	6	9	1	1	1	6	1	5	1	9	4	3	1	4	3	4	4	4	3	4	2	3	2	1	2	3	3	6
1	7	7	5	3	3	5	7	5	7	3	5	5	2	5	3	7	3	3	7	5	4	5	2	2	1	2	2	2	2	2	2	2	2	2	1	3	2	3	1	4
1	6	6	5	3	7	5	6	3	6	3	5	5	3	6	3	2	1	5	4	6	3	6	2	3	4	2	1	2	1	1	2	3	3	4	1	2	3	4	1	5
1	6	4	5	4	6	5	5	5	5	4	6	5	5	6	3	6	2	1	7	5	4	5	1	3	3	3	1	1	3	3	1	2	3	2	1	2	3	4	1	6
1	7	6	6	5	9	5	5	5	6	5	5	5	7	9	9	3	3	7	7	5	3	7	2	1	4	2	1	3	1	1	1	1	3	1	2	3	1	2	3	6
1	2	2	5	2	7	7	6	4	1	5	5	6	4	6	6	2	2	5	3	5	6	7	4	1	3	3	2	1	3	3	1	3	1	1	3	2	3	3	1	2
1	7	6	6	5	9	6	6	4	8	5	5	6	6	6	8	6	7	6	6	4	6	5	2	1	4	3	3	3	3	3	3	3	2	4	3	3	3	2	3	4
1	8	8	4	9	9	6	9	9	7	7	3	5	9	3	9	9	9	4	5	3	8	4	1	2	4	3	3	4	3	3	2	4	2	1	3	2	4	2	3	2
1	7	3	5	2	8	5	9	1	6	3	5	5	7	7	4	1	3	5	7	4	5	6	2	3	4	3	2	3	2	2	2	3	3	2	2	3	3	3	2	4
1	7	3	5	3	6	5	3	2	3	5	5	5	9	5	7	2	1	5	5	1	5	5	4	2	3	2	1	4	3	3	2	3	2	1	2	2	3	2	2	6
1	9	6	5	5	9	9	7	5	3	5	5	5	7	5	5	4	1	5	6	5	5	5	4	1	4	4	3	4	2	4	4	4	3	2	1	4	3	1	4	3
1	3	7	5	7	9	5	4	7	4	5	5	5	5	7	9	3	3	5	2	7	7	6	4	2	4	4	3	1	1	3	2	2	2	2	2	3	2	3	3	4
1	3	5	7	8	8	5	3	5	3	4	5	5	5	5	3	3	1	7	8	5	3	7	4	3	3	2	2	2	2	2	2	2	3	3	2	2	3	3	1	5
1	4	5	5	5	6	5	4	4	2	5	5	5	5	6	4	3	2	7	3	5	4	6	2	1	3	2	2	2	3	3	2	1	1	1	2	3	2	3	3	1
1	7	5	5	5	7	7	5	5	7	5	5	5	5	5	7	7	5	7	8	6	5	7	2	1	4	1	1	4	2	1	3	1	1	1	2	3	1	2	1	1
1	7	7	3	6	9	5	5	5	4	3	5	6	7	5	4	4	3	5	5	5	6	5	4	4	4	4	3	3	3	2	3	4	3	4	2	3	4	2	3	6
1	3	3	5	5	2	5	3	3	2	3	5	5	4	5	2	2	2	4	1	5	3	5	1	2	1	2	1	1	1	1	1	1	2	1	2	2	1	2	1	1
1	4	5	5	5	3	7	3	3	3	4	5	5	7	3	4	4	3	5	5	5	5	6	2	3	1	3	2	2	2	3	2	2	3	3	2	3	3	3	2	4
1	4	4	6	4	8	6	7	2	4	3	4	4	7	5	7	3	3	8	7	3	5	5	4	2	4	4	3	2	3	3	3	3	2	2	3	2	3	2	3	3
1	2	5	5	4	1	8	4	5	5	4	9	6	9	6	3	3	1	5	1	9	4	6	4	1	1	3	2	2	2	3	3	3	2	1	4	4	2	2	3	4
1	5	5	6	4	1	9	5	4	1	4	5	5	5	7	1	4	1	1	1	5	2	5	2	2	1	3	1	1	1	2	1	1	1	1	3	2	1	2	1	1
1	7	7	5	8	9	7	8	3	8	5	5	5	9	7	5	6	7	5	7	5	7	7	4	2	4	4	3	4	3	4	3	4	2	2	4	3	3	2	3	2
1	8	8	5	1	1	5	8	1	1	5	5	5	8	5	1	1	1	5	1	5	5	5	4	3	3	3	2	2	2	2	2	3	3	3	2	3	3	4	3	6
1	7	5	4	5	9	5	6	3	4	2	5	5	6	4	4	3	1	5	5	1	5	5	2	2	3	2	1	3	3	2	2	3	2	1	2	2	2	2	3	4
1	5	5	5	5	5	5	5	5	5	5	5	5	5	5	5	5	5	5	5	5	5	5	2	3	1	1	1	1	1	1	1	1	2	2	1	2	2	3	2	1
1	7	8	5	5	7	5	3	4	1	5	5	5	5	5	6	7	2	3	1	5	5	5	2	2	2	3	4	2	3	2	2	3	2	1	2	2	2	3	2	3
1	9	9	5	5	7	6	7	3	3	3	7	3	2	6	3	3	7	3	4	5	2	5	4	2	3	4	4	3	4	4	3	2	2	4	4	4	3	2	4	3
1	7	8	5	5	9	5	5	8	5	4	5	5	8	5	5	8	3	5	8	5	4	5	2	2	3	3	3	3	3	2	3	3	2	2	2	3	2	2	2	3
1	1	5	5	5	9	9	5	5	9	1	9	9	5	9	1	1	1	9	1	5	5	9	4	3	4	2	2	2	1	2	3	2	3	2	2	2	1	1	3	5
1	8	8	5	5	8	5	8	5	8	5	5	5	8	5	8	8	5	5	2	7	5	5	2	1	4	2	3	2	4	4	2	4	1	1	2	3	1	2	3	1
1	7	5	5	5	7	5	8	6	9	5	5	5	5	5	5	5	5	5	5	5	5	5	2	1	3	3	1	2	2	2	2	3	1	1	2	2	1	2	2	1
1	7	4	5	4	9	7	4	5	7	5	5	5	7	7	4	4	4	5	5	7	5	5	4	1	4	4	4	2	2	4	3	4	2	1	2	2	3	1	3	4
1	5	6	5	6	7	5	6	6	5	5	5	5	5	5	1	1	1	1	1	5	5	5	1	1	1	1	1	1	3	3	1	1	1	1	1	2	2	1	2	1
1	6	2	5	1	8	5	6	4	7	1	5	5	7	5	2	4	3	5	6	5	5	5	4	4	4	2	1	3	2	3	3	1	3	3	3	2	2	4	3	5
1	2	2	5	5	1	6	3	3	2	5	5	5	5	5	1	1	1	5	2	5	5	5	2	1	1	2	1	1	1	1	1	2	1	1	3	4	1	4	1	1
1	9	9	6	8	9	5	6	4	4	4	5	5	9	5	4	9	8	5	8	5	8	5	4	1	4	3	2	4	4	4	2	2	2	1	4	3	1	3	1	6
1	4	2	2	3	1	1	2	2	2	2	7	5	5	5	1	1	1	1	5	5	5	5	4	1	1	3	2	1	2	3	1	1	1	1	2	2	2	1	2	1
1	8	8	2	6	9	6	8	8	9	6	2	2	9	6	9	7	4	4	9	4	6	4	2	2	4	3	3	4	3	1	2	3	2	3	2	2	1	4	3	6
1	5	5	4	3	6	5	4	5	6	5	7	5	5	5	3	3	4	3	5	6	5	5	4	2	2	3	3	2	3	3	2	2	2	2	2	2	3	3	3	3
1	5	5	5	3	3	7	4	3	5	1	7	5	7	5	3	3	1	5	5	5	1	5	4	2	1	2	2	2	2	3	3	3	4	3	2	2	3	3	3	5
1	4	4	5	5	8	6	4	4	3	4	5	6	4	5	8	5	2	6	5	5	4	6	4	3	4	2	2	1	2	2	2	1	3	3	2	2	2	2	1	3
1	7	4	5	4	9	5	8	2	3	2	6	5	8	7	8	4	2	9	3	3	4	5	4	2	4	4	1	3	3	3	2	3	2	2	2	1	3	3	3	1
1	7	4	5	4	6	6	4	4	2	3	7	7	8	6	4	4	3	7	7	6	3	5	2	1	3	1	1	1	2	1	1	3	3	3	2	3	3	3	2	4
1	7	7	5	5	8	5	8	4	3	3	5	5	7	5	8	8	3	8	2	6	7	5	4	1	3	3	2	3	1	3	1	2	1	1	2	3	1	3	2	1
1	4	5	5	5	6	6	4	9	4	5	5	5	5	6	5	4	4	5	4	5	4	5	4	3	2	3	2	1	2	3	2	2	3	2	2	3	1	3	1	4
1	4	5	5	6	2	5	5	5	5	5	8	5	5	5	5	1	1	5	1	5	5	5	4	3	3	4	4	2	3	4	4	1	4	3	3	3	2	2	3	5
1	1	3	5	1	3	5	3	7	1	5	5	5	5	5	1	2	1	5	1	5	5	5	4	1	1	2	4	1	3	4	2	1	3	1	3	3	1	2	2	1
1	6	6	6	4	3	8	3	3	5	2	8	5	8	8	5	3	3	7	7	7	5	8	2	2	3	3	3	1	2	4	2	4	2	2	3	2	1	3	2	4
1	2	4	5	4	6	5	6	2	1	2	7	5	7	5	4	4	2	6	1	6	4	6	2	2	3	3	2	1	2	2	2	3	3	3	2	2	3	3	2	5
1	5	5	5	5	5	5	5	5	5	5	5	5	5	5	5	5	5	5	5	5	5	5	2	1	1	2	1	1	1	2	2	1	1	1	2	2	1	1	1	1
1	9	7	5	5	3	5	6	2	7	2	5	5	7	5	7	4	2	5	4	5	7	5	4	1	2	3	2	4	3	3	4	3	2	1	3	4	3	1	3	3
1	6	5	5	5	7	8	8	5	7	5	5	5	6	5	5	5	5	7	7	5	5	5	4	3	3	2	2	2	3	3	2	3	3	2	2	2	3	3	3	3
1	1	6	5	6	8	5	8	5	2	1	5	5	8	5	5	6	1	7	2	5	5	5	4	2	4	2	2	2	2	2	2	3	2	2	2	3	2	2	2	4
1	5	4	4	5	7	5	5	6	5	5	6	5	7	5	5	5	5	5	4	4	5	7	2	1	4	3	1	2	2	3	2	3	2	1	1	2	3	2	1	1
1	8	3	5	3	9	5	7	6	7	1	6	5	8	5	5	1	1	8	4	5	1	7	2	4	4	3	2	3	1	4	2	4	4	4	3	2	4	4	3	6
1	8	7	5	2	6	7	7	6	2	3	5	5	8	8	1	2	2	8	6	8	5	8	2	3	2	3	2	3	3	3	3	3	2	2	3	4	3	3	2	6
1	8	7	2	5	9	5	6	1	9	5	5	5	9	5	8	6	1	5	5	5	5	5	4	1	3	4	3	4	3	2	2	3	2	2	2	2	3	2	3	4
1	7	7	3	5	9	5	5	3	3	5	5	5	5	5	2	3	3	5	5	5	5	8	4	1	4	2	2	1	3	2	2	1	1	1	1	2	1	1	3	5
1	8	7	5	7	9	6	7	4	8	1	4	6	6	5	6	7	1	7	9	2	7	4	4	2	4	3	1	3	3	2	2	3	2	2	2	2	3	3	2	6
1	7	7	6	4	9	8	8	5	8	7	6	5	9	7	7	7	4	8	8	7	4	5	4	1	4	3	2	3	2	3	3	4	1	1	3	4	2	2	4	6
1	8	7	5	7	9	5	7	2	2	5	5	5	2	5	8	7	7	5	3	5	5	6	1	2	3	2	1	2	1	1	1	1	2	2	1	2	3	3	1	5
1	5	6	7	6	8	8	4	4	3	1	6	7	8	8	1	1	1	5	4	5	4	8	4	1	3	3	2	2	2	2	2	4	3	1	3	2	1	2	3	3
1	4	4	5	5	2	5	5	2	4	5	5	5	4	5	1	5	3	5	5	5	5	5	2	1	4	1	1	1	1	1	1	1	1	1	2	2	2	4	1	1
1	4	4	5	6	9	6	4	3	6	5	5	5	9	5	4	5	4	7	2	6	5	5	2	2	3	2	1	2	4	3	2	3	2	4	2	2	2	2	2	2
1	7	4	3	6	8	5	4	4	7	4	6	5	6	6	7	4	3	6	4	6	5	4	2	1	3	2	1	3	2	2	2	3	1	1	2	2	2	2	2	3
1	6	5	5	5	6	5	6	6	5	5	6	6	6	6	5	5	3	5	5	6	3	5	2	3	3	2	2	3	2	2	2	3	3	3	2	2	3	3	2	4
1	8	5	6	6	6	6	6	6	6	6	6	6	6	6	6	9	9	9	9	6	8	6	4	2	4	4	4	4	4	4	4	4	2	1	4	4	2	2	4	3
1	6	5	7	6	7	8	5	6	5	5	7	7	7	7	6	7	6	7	6	6	7	7	1	3	2	3	1	1	3	3	2	2	3	3	3	2	3	2	1	6
1	6	6	5	6	9	3	7	7	6	1	5	5	6	6	9	6	5	5	9	5	6	5	4	3	4	3	1	4	3	3	1	2	3	4	3	3	4	4	3	8
1	5	7	5	5	9	7	5	5	5	2	2	5	9	5	5	2	2	5	2	7	5	5	4	3	3	2	2	2	1	1	2	4	3	3	2	3	3	2	3	4
1	1	1	5	1	1	9	5	5	1	2	8	9	1	5	1	1	1	1	1	3	3	5	1	4	1	1	1	1	2	3	1	1	4	4	1	1	4	4	1	6
1	4	4	5	4	6	5	4	4	4	4	5	6	6	5	4	4	4	5	1	5	4	5	4	1	3	3	3	1	3	2	2	3	1	1	2	2	2	3	3	5
1	9	5	6	5	5	6	5	4	6	5	6	5	5	5	4	5	5	5	4	5	4	6	2	2	4	3	1	2	3	2	1	2	2	1	2	4	1	3	2	2
1	6	6	5	4	6	5	5	5	5	5	6	5	6	5	4	6	4	4	4	6	5	5	1	3	2	2	1	3	2	2	3	2	3	4	2	2	3	3	2	7
1	9	3	3	5	3	7	3	3	3	5	5	5	7	7	8	2	2	2	9	4	6	4	1	4	4	1	3	3	2	3	2	2	4	4	2	4	4	4	3	5
1	2	4	5	5	7	5	5	4	7	3	5	5	6	5	2	2	2	4	1	5	5	5	3	1	3	4	2	2	3	2	2	3	1	1	3	3	1	1	2	2
1	2	2	5	7	9	5	2	5	2	5	5	5	5	5	4	3	3	5	1	6	5	5	2	2	4	2	3	1	3	3	3	2	2	1	3	2	2	2	3	3
1	1	1	7	4	1	8	1	5	1	5	7	7	7	7	1	1	1	9	1	7	1	8	2	2	1	2	2	1	2	2	2	3	3	2	2	2	1	3	2	5
1	1	4	8	5	3	5	5	5	3	5	5	5	8	5	3	1	1	5	2	6	5	5	3	1	2	4	3	2	4	3	3	3	1	1	3	3	2	1	2	4
1	3	3	5	9	7	5	6	5	6	1	5	4	5	1	1	1	1	1	1	5	1	5	3	1	1	4	1	1	1	4	1	2	1	1	4	2	1	1	2	1
1	8	8	5	5	9	5	7	5	9	4	5	4	8	5	5	4	2	5	8	2	1	5	4	1	4	4	4	3	3	4	3	4	1	1	3	2	1	1	3	1
1	2	3	5	7	8	6	4	5	2	1	5	5	2	5	8	1	4	5	2	6	4	6	2	3	1	2	2	1	2	3	2	4	3	3	2	3	3	3	2	6
1	7	7	5	8	9	5	7	5	7	7	5	5	7	5	7	7	7	8	7	7	8	5	3	1	3	3	3	3	4	3	3	3	1	1	3	4	2	2	3	3
1	3	3	5	1	1	5	3	6	5	1	5	5	5	3	1	1	1	5	5	5	5	5	1	2	1	2	1	1	1	1	2	1	2	1	1	2	4	2	2	4
1	7	3	5	3	8	6	6	4	8	5	5	5	3	6	7	8	4	6	6	5	5	8	3	1	4	3	2	4	4	3	4	4	2	1	3	3	2	2	2	4
1	7	7	5	5	8	5	7	5	7	5	8	5	7	5	7	3	1	5	3	5	3	6	3	1	3	3	3	3	3	3	3	3	1	1	2	3	2	1	3	1
1	8	7	5	7	7	7	8	5	7	5	5	5	6	5	7	6	2	5	6	5	4	5	2	3	4	4	2	3	3	3	2	3	3	3	3	3	2	2	2	5
1	6	2	5	5	1	6	4	8	6	4	8	7	7	5	4	4	2	6	5	6	5	7	3	1	1	3	1	2	2	2	2	1	1	1	1	2	2	2	1	1
1	1	3	5	5	5	5	8	4	1	4	5	5	9	5	9	4	2	5	1	5	4	7	2	1	2	3	1	3	3	2	2	3	1	1	2	2	3	3	2	5
1	5	9	5	9	9	5	5	3	5	3	5	5	3	5	9	5	3	5	5	5	3	5	2	2	3	1	2	1	3	3	2	2	2	1	2	2	3	2	3	5
1	9	9	5	1	1	5	1	2	1	4	5	5	5	5	1	1	1	4	1	5	9	9	2	1	4	3	4	4	1	4	4	2	1	1	4	4	2	2	2	1
1	7	7	5	2	7	5	3	3	3	1	5	5	6	5	7	1	1	7	1	5	4	5	3	2	4	3	3	1	2	2	2	3	2	2	1	1	3	2	3	4
1	5	5	7	5	1	7	5	5	1	3	9	5	7	5	1	3	1	2	5	7	5	7	3	1	1	4	1	1	4	3	2	4	1	1	3	4	2	1	2	4
1	1	1	5	1	1	5	1	9	1	5	5	5	5	1	5	1	1	1	9	5	5	5	2	1	1	1	1	1	3	2	2	1	1	1	1	1	2	1	1	1
1	3	2	5	2	7	5	6	5	3	5	5	5	7	5	7	2	2	5	5	4	3	5	2	3	1	2	2	1	2	2	2	1	2	3	3	3	2	2	4	6
1	4	2	5	1	7	9	6	1	4	1	9	9	9	9	4	2	1	6	4	9	1	7	2	2	4	3	2	1	1	3	1	1	3	3	1	2	1	2	1	5
1	6	6	5	6	9	5	9	6	7	5	5	5	6	5	7	5	4	5	6	6	5	5	2	3	4	3	1	4	3	4	2	3	3	3	4	4	2	3	2	4
1	5	9	5	9	7	5	5	4	3	5	5	5	5	5	5	5	3	4	5	5	5	5	2	3	3	1	1	1	1	1	1	1	3	1	1	2	3	3	2	6
1	8	3	7	3	1	8	8	2	7	4	6	5	7	5	4	4	4	5	5	6	5	5	4	1	2	4	2	4	4	4	4	4	1	1	3	3	3	1	3	1
1	8	8	5	8	8	4	8	8	8	5	7	5	3	5	5	5	5	5	5	5	5	5	3	2	3	1	2	3	1	2	2	3	3	2	2	2	4	3	1	6
1	1	1	5	5	8	5	1	3	1	1	5	8	7	9	1	1	1	5	1	5	5	8	3	2	3	3	2	1	2	3	2	2	2	2	2	2	1	3	2	1
1	6	5	5	5	7	5	5	5	6	5	5	5	5	5	7	5	5	7	5	5	4	6	2	3	4	2	2	3	1	4	3	1	3	1	2	1	4	2	1	5
1	7	6	5	5	7	5	4	8	8	4	5	5	3	5	4	5	6	5	6	5	7	5	3	3	3	2	2	3	3	2	3	2	3	2	3	2	2	3	2	6
1	5	7	7	7	7	5	3	3	5	2	5	5	5	5	3	3	3	5	5	5	8	5	2	1	4	4	3	1	3	3	3	1	3	3	4	2	3	2	2	3
1	5	5	5	5	6	5	5	4	4	5	5	5	7	5	5	5	3	5	5	5	5	5	3	2	1	2	4	4	2	4	2	1	2	1	2	2	3	3	2	5
1	5	4	5	5	6	5	5	4	4	5	5	5	5	5	4	4	3	5	2	5	4	5	2	3	3	1	1	2	3	2	2	1	3	1	2	2	2	3	2	5
1	8	5	5	5	9	5	6	4	7	5	5	5	5	5	6	4	2	5	5	5	4	5	1	2	3	2	1	3	2	1	1	1	2	3	1	2	4	3	3	5
1	3	5	5	5	8	5	5	4	4	5	5	5	4	5	6	4	2	5	3	6	2	6	3	1	4	2	1	1	3	2	2	2	3	1	2	2	3	2	2	5
1	1	3	5	5	1	5	5	6	4	5	5	5	4	5	2	1	1	4	1	5	5	5	2	2	1	3	1	1	2	2	2	2	3	3	2	3	2	1	2	2
1	5	5	6	3	1	5	5	3	5	1	5	5	5	5	1	2	1	3	3	5	5	5	2	1	1	3	2	2	2	3	2	1	4	2	1	2	3	2	1	3
1	8	5	5	2	2	5	8	5	8	2	5	4	7	3	1	4	1	1	6	5	3	5	2	2	1	3	2	3	3	2	1	3	2	2	2	3	2	2	1	5
1	5	5	6	5	6	7	5	5	5	5	5	5	5	5	5	4	5	7	5	5	3	6	1	1	2	2	1	1	2	2	1	1	3	2	1	3	3	1	2	5
1	2	5	5	5	3	7	5	4	2	4	8	5	9	5	2	1	3	5	2	8	5	6	1	2	1	3	3	1	2	1	1	3	2	1	3	2	2	4	2	3
1	3	7	5	5	9	3	7	3	3	5	5	5	8	5	8	7	1	3	2	5	5	5	3	3	4	3	2	2	3	2	2	4	3	3	3	3	3	3	3	5
1	6	6	5	7	4	5	7	6	8	5	5	5	5	5	8	5	6	5	5	3	7	5	3	3	3	4	2	3	2	2	1	1	2	1	1	3	2	1	3	3
1	4	4	7	6	3	7	2	8	2	6	7	7	7	5	1	2	2	7	7	3	4	5	1	1	1	2	1	2	2	2	2	2	1	1	2	2	3	3	2	3
1	5	5	5	5	5	5	5	5	5	5	5	5	5	5	1	5	5	5	5	5	5	5	2	1	1	2	1	1	1	1	1	1	1	1	1	1	1	1	2	1
1	2	2	5	2	1	6	4	3	1	1	5	7	5	8	1	1	1	5	1	7	5	7	4	4	1	3	2	1	2	4	4	1	4	4	4	4	2	4	1	7
1	4	6	5	4	6	6	5	4	5	4	8	5	6	5	4	4	3	5	5	6	5	6	1	1	2	3	2	2	3	1	1	2	2	1	1	2	1	1	1	1
1	7	7	5	5	3	5	5	5	6	5	6	5	8	5	5	5	5	7	9	5	5	6	2	1	2	3	2	3	1	3	4	3	1	1	3	3	1	2	2	1
1	6	7	6	4	9	9	6	3	5	3	6	8	9	7	7	5	3	5	6	9	9	9	3	1	3	3	2	2	3	3	2	3	2	2	3	3	1	2	2	1
1	7	7	5	6	6	7	7	3	7	5	6	5	7	6	3	6	5	5	7	6	4	5	3	1	3	2	1	3	2	1	2	3	2	1	3	2	1	3	3	3
1	8	7	6	7	5	7	5	4	3	2	3	6	5	5	2	1	2	7	2	6	4	6	3	3	2	3	2	4	3	2	3	4	3	3	1	2	3	2	2	4
1	4	4	7	7	9	5	4	3	3	3	5	5	9	8	5	5	5	5	5	6	6	5	3	1	4	3	2	1	1	4	4	4	2	2	3	4	2	2	3	5
1	1	1	3	1	1	3	1	1	1	1	5	1	3	3	1	1	1	1	1	5	1	5	1	4	1	1	1	1	1	1	1	1	4	4	1	2	3	4	1	6
1	7	7	5	5	7	5	6	3	6	5	5	5	5	5	5	5	5	5	5	5	5	5	2	3	3	2	2	2	2	1	1	1	3	3	1	1	4	3	3	5
1	7	7	5	5	9	5	8	5	9	5	5	5	9	5	3	6	4	7	8	5	6	5	3	2	4	3	2	3	3	2	2	2	3	2	2	2	3	4	2	6
1	7	4	6	5	8	5	4	2	6	1	5	3	9	5	7	5	5	5	6	9	5	5	3	4	3	1	3	3	3	2	1	1	3	3	2	1	4	3	3	5
1	4	3	5	3	9	6	3	5	4	5	7	5	7	5	6	5	3	5	4	2	7	5	3	2	3	1	3	3	2	1	2	3	2	1	1	2	1	3	2	4
1	1	3	5	3	8	5	7	4	2	3	5	5	8	5	8	2	1	6	9	5	4	5	3	1	4	2	1	1	1	2	3	2	1	1	2	2	3	2	1	3
1	3	5	5	7	5	5	6	4	3	5	5	5	5	5	5	5	4	5	5	5	4	5	3	1	4	2	1	1	3	3	1	1	1	1	2	1	1	2	1	1
1	3	3	5	5	3	5	4	6	3	5	5	5	5	5	3	3	3	5	5	5	5	5	2	1	1	2	1	1	2	1	2	1	2	2	1	2	3	2	1	3
1	3	5	5	3	5	5	5	3	3	5	5	5	5	5	3	1	3	5	4	5	4	5	3	1	1	2	1	1	2	1	2	1	1	1	2	2	2	2	1	1
1	1	1	1	1	5	1	1	1	1	5	5	1	1	1	1	1	1	1	1	5	1	8	2	1	1	1	3	1	1	4	1	1	1	1	1	3	2	2	1	3
1	3	8	5	9	9	7	7	3	3	7	5	5	9	7	3	9	7	5	5	3	7	8	3	1	4	2	4	2	3	4	3	3	2	2	3	3	4	2	4	2
1	9	7	5	3	8	5	4	8	9	4	5	5	8	8	8	3	9	5	5	5	7	5	3	2	4	1	2	4	2	3	1	4	3	3	2	3	3	3	2	4
1	4	5	5	4	6	6	4	3	3	5	5	5	4	6	4	4	3	5	4	5	5	6	1	3	3	2	1	2	2	2	2	2	3	3	1	2	3	4	1	6
1	7	6	5	2	8	5	3	2	7	1	5	5	2	5	8	1	1	5	5	1	2	5	3	2	3	2	3	3	3	3	2	2	2	2	2	2	3	2	1	5
1	9	6	5	5	9	5	8	5	9	5	5	5	3	3	9	2	1	1	1	3	3	3	3	2	4	3	2	4	4	2	3	3	3	3	2	2	4	3	3	5
1	9	9	1	1	5	1	1	1	9	1	5	5	9	5	1	1	1	5	2	5	1	5	3	3	2	3	1	3	3	2	1	3	3	2	2	3	3	3	3	5
1	2	3	5	6	7	4	6	2	2	1	7	6	9	4	8	6	4	3	5	2	3	3	3	2	3	4	2	2	2	2	2	3	2	2	2	2	1	3	3	3
1	7	7	5	5	7	6	5	3	6	2	5	5	6	5	6	5	2	5	5	6	4	5	3	2	4	3	4	3	3	2	2	3	1	2	1	2	2	2	3	5
1	2	1	5	2	1	9	1	5	2	1	9	9	9	9	1	1	1	1	1	9	1	9	1	3	1	3	3	1	4	4	2	1	2	3	2	3	3	2	2	4
1	9	9	3	9	9	6	9	6	9	5	3	3	8	6	9	9	9	5	9	3	9	5	3	1	4	3	4	4	3	4	4	4	2	2	3	4	3	2	4	4
1	1	3	5	5	2	5	1	1	1	3	5	5	1	5	2	2	1	5	5	1	1	5	4	2	1	3	3	1	4	4	4	1	2	2	3	2	3	4	3	1
1	1	2	7	5	1	8	2	1	1	3	8	9	2	5	1	1	1	1	5	3	4	8	1	1	1	4	4	2	4	1	2	1	1	4	4	3	3	2	4	5
1	4	5	5	4	6	5	5	5	5	5	4	5	6	6	3	5	3	5	5	6	4	5	1	2	1	3	2	2	4	1	1	3	2	3	2	3	4	2	3	3
1	9	7	5	4	9	8	5	5	3	5	8	5	7	5	4	7	8	8	3	5	5	5	2	2	3	1	1	3	2	2	1	3	4	2	2	2	3	3	1	4
1	3	3	5	6	7	5	4	7	3	3	5	5	6	5	4	6	5	3	7	8	4	6	3	2	2	2	1	1	3	1	2	4	3	3	2	2	3	3	2	4
1	7	5	5	7	9	5	9	5	5	5	5	5	5	5	9	5	1	5	6	6	5	5	4	1	4	4	2	4	4	4	4	1	1	1	4	4	2	1	4	1
1	7	7	5	6	7	5	7	5	8	5	5	5	7	5	4	7	3	5	5	5	3	5	2	3	4	3	2	3	2	3	2	3	2	2	2	3	2	3	2	4
1	8	5	5	4	7	6	4	5	6	3	5	6	5	6	6	4	2	5	3	4	4	6	4	3	4	3	2	3	2	2	2	2	2	2	3	2	4	4	3	5
1	2	5	5	2	1	7	5	2	2	5	7	5	3	5	1	2	2	5	5	6	2	7	2	1	1	1	1	1	2	2	1	2	1	1	1	2	1	2	1	1
1	9	9	5	1	9	5	4	5	9	5	5	5	5	5	9	5	1	5	5	4	5	5	3	3	4	2	2	3	2	1	1	3	3	2	1	2	3	3	3	4
1	5	5	5	5	5	5	5	5	5	5	5	5	5	5	5	5	5	5	5	5	5	5	2	1	1	2	2	1	2	3	1	1	1	1	2	2	1	4	2	4
1	7	5	5	4	7	4	8	8	8	6	5	5	6	5	6	4	6	5	5	4	5	5	1	1	3	2	1	2	1	2	2	2	2	1	2	2	2	2	2	3
1	5	3	5	5	5	5	5	2	5	5	5	5	5	5	9	5	5	5	5	5	5	5	4	2	2	4	4	2	4	4	3	2	4	2	4	1	1	3	3	5
1	5	5	7	7	8	7	5	3	5	5	6	3	6	6	7	7	3	5	6	5	7	6	2	2	3	3	3	2	2	2	2	2	2	3	2	3	2	2	3	3
1	4	4	6	6	4	7	3	5	4	3	7	7	6	7	3	3	3	6	3	6	4	6	3	2	2	3	2	3	2	2	2	3	3	3	2	2	3	3	2	5
1	7	5	3	1	9	5	5	5	8	2	2	2	5	5	4	3	1	5	1	5	2	5	3	3	4	3	2	3	2	2	2	2	3	3	2	2	3	3	3	5
1	9	4	5	5	9	5	6	5	4	6	5	5	9	5	7	5	7	5	5	6	5	5	3	1	4	3	1	3	3	2	2	4	2	1	2	3	2	2	3	1
1	6	5	3	6	6	5	4	3	2	1	5	5	5	5	2	1	1	5	5	5	3	5	1	3	3	3	1	2	3	2	1	2	3	2	1	2	3	4	2	3
1	7	5	6	4	5	5	4	3	9	3	5	5	8	5	3	4	5	5	4	3	8	5	2	1	1	3	2	3	2	3	4	3	2	1	3	3	2	2	2	2
1	1	2	5	9	8	5	8	5	1	5	7	5	3	7	3	5	5	5	5	7	3	9	2	1	3	4	1	1	2	2	1	2	1	1	2	2	2	3	3	1
1	2	3	5	7	9	5	4	1	1	5	5	5	8	5	3	7	4	5	5	5	4	5	2	2	3	3	1	1	2	3	2	4	2	1	2	2	2	3	2	3
1	3	4	5	6	6	5	5	2	3	5	5	5	5	5	6	5	2	5	5	5	5	5	3	1	3	3	2	2	2	3	2	2	1	1	2	4	1	1	2	2
1	3	5	7	4	8	7	6	4	5	3	6	5	6	8	5	5	5	5	5	7	5	8	3	1	3	3	3	1	1	3	3	3	1	1	2	2	2	2	3	1
1	7	5	5	5	9	5	6	3	5	5	2	3	5	5	5	5	5	5	5	5	5	5	3	2	4	2	2	3	2	2	2	2	2	2	2	2	3	2	3	5
1	3	3	5	2	8	6	6	4	3	3	5	6	7	8	4	3	1	7	3	7	4	5	1	2	4	3	1	1	3	4	3	2	2	1	2	3	4	3	2	4
1	5	3	9	1	9	5	5	1	1	5	5	5	1	5	1	1	1	5	5	5	5	5	1	3	4	2	4	2	2	2	3	2	3	3	2	2	2	3	2	5

## Sheet: EMAQ TFEQ Sample 2
Sample	EMAQ1	EMAQ2	EMAQ3	EMAQ4	EMAQ5	EMAQ6	EMAQ7	EMAQ8	EMAQ9	EMAQ10	EMAQ11	EMAQ12	EMAQ13	EMAQ14	EMAQ15	EMAQ16	EMAQ17	EMAQ18	EMAQ19	EMAQ20	EMAQ21	EMAQ22	TFEQ1	TFEQ2	TFEQ3	TFEQ4	TFEQ5	TFEQ6	TFEQ7	TFEQ8	TFEQ9	TFEQ10	TFEQ11	TFEQ12	TFEQ13	TFEQ14	TFEQ15	TFEQ16	TFEQ17	TFEQ18
2	1	3	5	4	7	6	3	5	1	5	5	5	5	6	4	6	3	5	2	4	3	6	2	3	3	2	2	2	2	2	2	1	3	3	1	2	4	3	2	5
2	6	5	5	6	7	6	4	5	4	3	5	6	6	5	4	3	4	4	5	4	3	5	2	1	2	2	3	2	3	3	4	3	1	1	2	2	3	3	3	3
2	7	7	2	6	8	5	6	5	5	1	5	4	6	3	1	1	1	1	9	5	3	3	1	2	2	1	2	2	2	2	1	2	3	3	2	2	4	3	2	3
2	8	8	3	8	8	3	4	7	8	3	3	3	7	3	5	6	6	3	8	3	7	2	3	4	4	4	4	4	4	4	4	4	3	3	3	2	1	3	3	4
2	5	5	5	9	8	5	7	5	6	3	5	5	5	4	5	3	4	5	3	5	5	5	4	1	3	2	2	3	3	3	2	1	1	1	3	4	1	2	2	1
2	5	5	5	5	7	5	5	7	7	7	7	5	7	5	4	4	4	6	7	6	4	7	2	1	3	2	3	2	3	3	3	2	2	1	2	2	3	1	3	1
2	5	5	5	5	6	5	5	4	3	2	6	5	2	5	4	2	2	5	2	5	5	5	2	1	2	1	3	2	2	2	2	1	1	1	1	2	1	2	3	3
2	7	6	3	5	7	5	6	4	4	2	7	5	7	5	1	3	2	5	5	5	4	3	4	2	3	3	4	3	4	2	3	3	2	1	3	1	1	3	3	1
2	4	3	5	4	2	7	4	5	3	5	7	7	7	5	2	3	2	7	3	7	5	6	2	1	2	2	2	2	2	1	2	2	1	1	2	3	2	1	2	3
2	6	5	5	5	6	5	4	3	3	5	5	4	5	5	6	3	3	5	5	6	3	5	2	1	2	1	3	3	2	1	1	2	3	3	1	2	3	1	2	2
2	3	3	5	7	7	5	5	5	3	3	3	5	5	5	3	7	1	1	1	3	3	3	3	3	3	3	3	2	2	3	3	2	3	2	3	2	3	3	3	5
2	2	2	5	2	2	5	5	6	2	5	5	6	5	5	3	2	2	7	2	5	4	6	1	2	1	2	2	1	3	2	4	1	2	2	1	1	3	4	1	3
2	4	4	5	5	2	5	3	3	4	5	5	7	6	5	3	2	2	5	1	5	5	5	3	2	2	3	4	2	3	2	3	2	3	2	3	3	2	2	2	2
2	7	7	4	7	8	7	7	2	6	3	4	3	8	7	7	7	7	7	8	6	6	6	3	2	3	3	3	3	3	2	2	3	2	2	2	2	3	2	3	3
2	6	6	5	7	9	5	7	5	9	5	5	5	7	5	9	5	7	5	7	6	5	7	3	2	4	4	3	3	2	2	3	4	2	4	2	3	2	1	3	4
2	2	2	7	2	5	6	2	6	2	1	6	1	9	6	1	1	2	6	2	2	2	7	3	2	2	1	3	2	2	3	2	2	3	2	2	1	3	3	2	4
2	5	5	9	5	9	9	5	5	5	5	9	5	5	5	5	5	5	1	1	1	9	9	3	2	4	4	2	2	3	3	4	2	3	2	3	1	3	4	3	4
2	7	5	5	3	7	6	3	3	7	2	6	5	7	5	3	3	2	5	7	5	3	7	3	1	3	3	3	3	3	3	3	3	2	2	3	2	3	2	4	4
2	5	5	5	5	7	9	5	3	3	1	9	9	5	7	3	1	1	5	5	6	5	9	4	1	2	1	4	2	4	3	1	3	1	1	2	3	1	4	2	4
2	7	3	5	3	1	9	2	5	1	5	6	5	5	7	2	9	1	3	7	5	3	8	1	3	4	1	2	4	2	1	1	1	3	2	1	2	2	2	1	4
2	2	3	5	6	3	5	7	4	1	1	6	5	6	7	3	2	1	5	3	6	3	6	2	2	2	2	3	2	3	3	2	3	1	1	3	2	2	3	3	3
2	6	7	3	5	8	5	6	1	2	3	5	2	3	5	4	2	2	5	6	3	5	6	2	1	4	1	1	3	2	1	1	2	1	1	1	3	2	2	1	3
2	9	8	5	4	9	5	7	5	7	3	5	5	8	5	9	4	5	5	1	5	5	5	3	3	4	2	3	4	3	2	1	3	3	4	3	2	3	3	3	5
2	5	5	5	5	5	5	5	5	5	5	5	5	5	5	5	5	5	5	5	5	5	5	2	1	1	1	2	1	2	2	1	1	1	1	2	1	1	1	1	2
2	2	7	6	5	7	5	7	2	2	4	5	6	4	6	7	3	2	5	3	6	4	5	3	1	3	2	3	2	3	2	2	3	1	1	3	3	1	2	3	1
2	3	5	5	5	1	5	2	3	1	5	5	5	5	5	2	1	1	5	4	5	4	5	2	1	1	1	2	1	2	3	3	1	1	1	3	2	4	2	2	5
2	9	9	5	7	9	5	8	5	3	4	4	5	5	5	5	7	6	7	5	5	7	5	3	1	4	3	2	4	4	4	3	2	3	2	3	2	2	4	3	3
2	8	9	5	4	9	6	9	4	9	2	4	6	5	7	2	3	3	5	6	4	8	7	3	1	4	3	3	3	4	3	3	3	2	1	3	1	4	3	4	7
2	7	5	4	5	8	5	5	2	3	5	5	4	5	3	3	7	5	2	2	3	5	5	1	2	3	2	2	3	2	1	2	2	4	3	2	2	4	3	2	6
2	9	5	5	4	9	6	3	5	3	3	9	8	8	7	8	4	5	3	1	2	9	5	2	3	4	4	4	4	4	3	1	2	3	3	2	2	3	3	3	5
2	1	6	5	7	1	5	3	1	1	5	7	7	2	5	7	1	1	7	1	5	4	6	3	4	2	3	1	1	3	1	3	2	4	3	2	2	3	4	2	4
2	1	1	5	5	9	5	6	1	1	9	9	5	1	5	6	2	1	1	6	5	2	5	3	1	3	3	3	2	3	3	4	1	1	3	3	4	3	3	4	4
2	7	5	4	5	8	5	5	2	3	5	5	4	5	3	3	7	5	2	2	3	5	5	1	2	3	2	2	3	2	1	2	2	4	3	2	2	4	3	2	6
2	7	7	5	7	7	6	7	3	7	5	5	5	4	5	5	8	3	5	3	5	4	6	3	1	4	3	3	4	3	3	3	1	1	1	3	3	3	2	2	4
2	3	4	6	4	2	8	4	3	4	6	5	7	4	4	3	8	3	5	7	7	2	6	3	2	1	3	3	2	3	3	3	1	2	1	2	2	2	3	3	3
2	7	6	5	5	9	5	9	5	5	5	5	5	7	5	3	3	5	5	7	4	5	5	3	3	3	3	2	3	2	2	2	3	3	3	2	2	2	3	3	4
2	5	5	5	5	5	5	5	5	5	5	6	5	5	5	5	5	5	5	5	5	5	5	2	1	1	1	2	1	2	1	2	1	1	1	2	2	2	3	1	1
2	7	7	5	5	8	6	7	5	5	5	3	5	5	6	4	4	6	5	5	3	7	5	3	3	3	3	3	3	3	3	3	3	3	2	2	2	1	4	3	6
2	3	2	6	3	7	7	3	7	2	2	7	7	6	6	3	1	1	7	3	7	3	6	3	2	3	2	3	2	3	2	3	2	2	2	3	2	2	2	3	3
2	4	6	5	6	8	5	7	2	2	5	6	5	7	5	1	4	4	5	2	5	6	5	4	1	3	4	3	3	4	3	4	2	1	1	4	4	1	1	4	1
2	8	2	5	2	1	8	1	4	8	1	8	5	5	5	1	1	1	3	1	7	3	7	2	1	1	1	2	1	3	1	3	1	1	1	3	4	1	4	2	1
2	1	2	5	7	1	7	6	6	1	1	8	5	6	5	1	1	1	6	1	6	1	7	3	2	1	2	3	1	4	2	2	3	3	3	2	2	4	4	2	4
2	9	4	3	4	9	5	8	9	9	4	3	3	3	3	7	2	2	1	9	2	3	5	3	3	4	4	4	4	3	4	3	4	4	4	3	3	3	4	4	5
2	3	5	5	4	4	6	5	3	4	3	6	5	2	6	4	4	3	5	4	4	5	5	2	1	2	1	2	2	2	1	1	1	1	1	1	3	1	1	2	1
2	7	5	4	7	8	4	5	2	4	4	7	6	5	5	2	5	2	5	2	8	2	6	3	3	4	3	3	2	3	4	2	2	4	1	1	2	2	2	3	5
2	7	3	5	3	8	6	7	4	3	7	5	5	2	5	3	4	3	6	5	4	6	5	2	3	4	2	2	3	1	2	3	1	3	1	2	2	1	3	2	3
2	9	5	3	5	9	7	9	2	2	5	5	5	3	5	2	1	1	5	1	5	1	5	2	1	3	2	3	2	2	2	4	4	1	1	3	2	3	1	3	1
2	3	7	5	6	8	5	7	5	3	4	5	5	5	6	4	6	3	5	4	5	3	5	3	2	4	1	3	2	2	2	3	2	3	1	2	2	3	2	2	4
2	2	2	6	5	7	4	7	3	1	5	5	5	7	5	3	5	5	5	5	6	5	7	2	1	3	1	1	3	1	1	1	3	1	1	3	3	3	1	2	1
2	2	2	5	5	7	5	3	6	2	1	6	6	4	5	2	1	2	5	5	4	2	6	3	2	2	3	2	2	3	3	2	2	2	2	2	2	4	2	2	3
2	7	7	5	5	9	7	8	5	7	6	5	6	5	7	7	5	6	5	6	6	7	6	4	1	4	3	3	2	4	3	4	2	2	1	4	4	1	2	3	3
2	7	7	5	5	4	5	6	3	3	5	5	5	7	5	4	6	2	5	5	5	4	6	4	1	2	1	3	3	3	2	2	3	1	1	2	2	1	1	2	1
2	9	3	3	5	9	5	9	9	9	1	5	5	5	5	5	8	1	5	9	5	9	5	2	3	4	3	3	2	3	1	4	4	2	1	2	3	1	2	3	3
2	3	3	5	5	7	6	3	4	3	4	5	5	5	5	6	4	3	7	4	5	4	5	2	1	3	1	2	1	1	2	1	1	1	1	2	2	2	2	2	3
2	3	5	3	7	7	3	7	7	3	3	5	5	6	5	3	2	4	5	1	5	5	5	4	1	4	2	3	1	3	2	4	2	1	1	3	2	2	1	2	2
2	5	5	4	1	5	6	4	1	3	2	5	5	1	5	7	1	1	9	1	5	9	2	3	3	1	1	2	1	4	3	3	1	4	2	3	2	2	2	2	4
2	5	5	5	5	7	6	5	3	5	5	7	6	5	5	3	5	5	5	5	7	5	6	1	1	2	2	2	2	2	2	1	1	1	1	1	3	1	3	1	3
2	4	4	7	2	9	5	3	5	2	2	5	5	7	5	1	1	1	5	4	6	3	5	3	2	3	3	1	1	3	3	1	1	1	1	3	2	4	3	1	1
2	7	4	5	5	8	5	7	3	7	2	5	5	1	5	4	5	2	5	5	3	6	5	2	3	3	3	2	2	3	2	2	2	2	2	1	2	3	4	3	3
2	3	5	5	5	7	5	6	4	2	5	5	5	5	5	4	3	2	7	4	5	5	5	1	3	1	1	1	1	1	1	1	1	3	3	1	2	4	2	2	6
2	5	5	5	6	6	4	5	5	5	5	4	5	5	5	7	5	5	5	5	5	5	5	2	1	3	1	1	1	1	1	1	1	2	1	1	1	3	2	1	4
2	2	6	5	5	6	6	4	2	4	5	5	5	5	6	7	3	3	5	4	5	4	6	2	3	2	2	1	1	2	1	1	1	4	3	1	2	3	3	1	6
2	2	2	4	4	7	7	4	7	2	1	7	7	3	7	6	2	1	5	6	2	7	8	4	2	3	4	4	3	2	2	2	3	2	2	2	3	2	2	3	2
2	2	2	5	2	2	7	2	3	2	2	8	8	4	8	1	1	1	5	1	5	1	6	3	2	3	2	3	1	2	1	1	1	1	2	3	3	2	3	1	2
2	1	1	5	5	6	6	7	5	8	5	6	5	8	5	3	1	1	9	1	5	5	5	3	1	3	3	3	3	3	2	2	4	1	1	1	1	1	1	3	1
2	7	4	4	1	7	5	5	2	4	2	5	6	3	5	2	1	1	8	5	4	3	5	2	3	3	1	1	2	1	2	1	3	3	3	2	2	2	3	2	6
2	1	1	5	1	1	5	6	2	2	1	6	5	5	5	5	1	1	8	1	5	5	5	2	3	3	1	2	2	2	2	2	3	3	2	2	2	3	3	1	3
2	6	2	5	4	3	7	6	4	3	2	6	6	3	5	2	3	2	7	5	4	5	5	2	1	2	3	3	3	3	2	2	2	2	1	2	2	1	3	2	2
2	3	3	6	5	1	5	5	4	3	4	6	6	2	6	3	1	1	5	5	6	4	6	2	3	1	1	2	1	2	1	1	1	3	2	2	1	3	2	1	5
2	2	2	5	5	6	5	5	3	3	5	5	5	3	5	5	5	5	5	5	5	5	5	1	4	3	1	2	2	2	2	1	1	4	2	1	1	3	2	2	3
2	5	5	5	5	3	5	5	7	5	4	6	5	5	5	4	5	4	6	5	6	5	5	1	1	2	2	2	1	2	2	2	1	2	2	2	2	2	2	2	2
2	5	5	5	5	7	5	6	5	5	5	5	6	7	5	3	3	3	2	7	8	3	5	3	4	4	2	3	3	3	1	1	1	4	1	1	2	1	3	2	4
2	1	2	7	2	1	7	3	3	1	1	4	6	2	6	1	2	4	6	6	6	4	6	1	1	1	2	2	1	1	3	2	2	1	1	1	2	1	1	2	1
2	1	1	5	3	6	7	5	4	4	3	6	7	8	6	3	1	1	3	1	5	6	5	3	3	3	2	2	1	2	2	1	2	2	1	1	2	2	4	2	2
2	3	4	8	4	1	9	2	5	2	4	7	7	5	5	4	4	5	7	1	6	4	6	2	1	1	1	1	1	1	2	1	1	1	1	1	3	1	1	1	3
2	1	2	5	8	9	7	7	3	1	2	9	5	5	8	8	2	2	9	1	4	5	7	2	1	4	2	2	2	3	3	2	3	3	3	2	2	3	2	2	6
2	5	5	5	5	7	5	5	7	5	5	7	5	7	5	5	5	5	7	7	5	5	5	4	1	3	2	3	2	3	3	2	3	2	1	3	4	2	3	3	4
2	9	4	5	2	1	5	7	4	9	4	5	5	8	5	4	2	1	5	7	5	3	5	3	1	2	4	4	4	3	4	4	4	1	1	3	3	1	1	4	3
2	7	5	5	5	5	5	5	5	5	5	5	5	5	5	5	5	5	5	5	5	5	5	3	2	2	2	2	3	2	2	2	2	2	2	2	3	2	2	3	4
2	1	2	5	5	8	5	5	3	1	1	5	5	5	5	6	2	4	6	1	5	5	5	3	2	4	3	3	1	3	3	3	2	2	1	3	4	3	3	3	1
2	7	7	2	6	9	9	1	2	2	1	8	8	3	5	1	1	1	5	1	7	1	9	3	4	3	4	3	2	2	4	2	2	3	1	4	4	3	4	2	3
2	7	3	5	5	7	5	5	2	8	1	5	5	5	5	5	5	1	9	1	5	1	5	4	4	2	1	1	1	1	1	1	1	4	2	1	2	4	4	1	5
2	1	1	5	1	1	7	3	2	1	3	7	5	2	5	1	1	2	3	1	7	3	7	2	1	2	2	3	1	2	2	1	1	1	2	2	2	4	3	2	4
2	3	5	5	5	7	5	5	5	3	5	5	5	5	5	5	5	3	5	5	3	5	6	2	1	3	4	3	1	2	2	2	1	1	1	1	3	3	2	4	2
2	7	5	7	1	9	5	8	5	8	5	5	5	1	5	6	1	1	9	1	9	3	9	4	1	4	2	4	3	4	3	3	1	1	1	2	1	4	2	3	1
2	3	3	5	5	7	6	3	4	3	4	5	5	5	5	6	4	3	7	4	5	4	5	2	1	3	1	2	1	1	2	1	1	1	1	2	2	2	2	2	3
2	4	5	4	6	6	5	4	4	4	5	5	4	6	5	4	3	3	5	3	5	5	5	3	2	2	1	3	1	3	1	3	2	1	1	2	2	2	1	3	2
2	4	5	6	5	7	5	4	5	4	5	5	6	5	5	4	5	3	7	6	6	5	5	3	1	3	2	3	3	2	3	1	2	1	1	2	2	1	2	3	1
2	3	5	5	5	7	5	5	3	3	5	5	5	3	5	1	2	3	5	5	5	5	5	3	2	3	2	2	2	1	2	1	1	3	1	1	2	3	3	1	5
2	5	5	5	5	3	5	5	3	2	5	5	5	5	5	5	5	1	5	5	4	5	5	3	1	1	3	2	1	2	2	1	1	3	1	2	2	1	3	1	4
2	1	6	5	7	8	7	7	7	3	3	5	7	7	5	8	7	2	2	1	6	6	8	2	1	1	1	2	1	2	3	1	1	1	1	1	1	3	3	2	2
2	3	3	7	6	2	7	5	3	3	5	5	6	1	7	5	3	1	5	3	6	3	7	3	3	1	1	3	2	2	2	1	2	3	3	2	2	3	4	1	4
2	7	3	5	4	8	5	7	2	2	5	6	6	5	7	7	3	3	5	2	5	5	6	2	3	3	3	3	3	3	2	2	2	3	2	1	3	3	3	2	3
2	1	1	5	1	1	7	3	2	1	3	7	5	2	5	1	1	2	3	1	7	3	7	2	1	2	2	3	1	2	2	1	1	1	2	2	2	4	3	2	4
2	9	9	5	1	9	9	9	9	9	5	7	5	7	9	9	1	1	5	5	5	5	5	4	3	3	3	3	3	3	3	3	1	3	2	3	3	2	3	3	1
2	5	5	5	5	9	5	9	5	4	3	5	5	7	5	7	3	2	5	3	5	3	5	3	2	3	3	3	1	2	2	1	1	1	1	2	2	3	3	3	4
2	9	9	1	9	9	5	9	9	9	8	4	8	6	8	2	2	2	8	8	8	2	8	4	3	2	3	4	2	4	4	4	2	1	1	4	4	1	1	2	1
2	5	5	5	5	5	5	5	5	5	5	5	5	5	5	7	4	5	5	5	5	5	5	2	4	3	2	2	3	1	1	2	1	3	4	2	2	4	3	1	5
2	3	5	7	5	4	6	5	5	2	5	8	8	6	5	6	7	3	3	7	5	5	6	2	3	2	2	4	2	3	2	2	3	3	2	2	1	3	4	2	4
2	5	5	5	5	3	7	5	3	5	5	7	5	5	7	5	5	5	5	5	7	5	7	1	3	2	1	1	1	2	1	1	1	2	1	1	2	2	2	1	4
2	8	7	2	3	9	7	8	1	7	1	5	5	8	3	7	1	1	5	5	2	4	2	2	4	4	4	1	4	4	3	2	4	4	2	1	3	2	4	3	5
2	1	9	5	5	1	9	9	1	1	1	9	9	5	9	1	1	1	5	1	9	5	9	1	1	3	1	1	1	1	1	1	1	1	1	1	2	1	1	3	4
2	7	3	5	3	9	5	9	4	9	5	5	5	5	6	4	4	1	6	9	6	5	6	3	1	4	2	1	3	1	1	1	1	1	3	1	2	2	3	4	3
2	7	7	5	7	9	5	7	5	3	3	5	5	1	5	9	6	3	1	5	5	3	5	2	4	4	4	3	3	3	3	3	1	3	2	2	3	1	4	3	5
2	8	9	5	5	9	5	9	1	1	1	5	5	9	5	3	1	1	4	9	9	6	5	3	1	3	4	3	4	3	4	4	2	1	1	3	3	3	1	2	1
2	7	7	5	7	9	7	7	9	8	5	5	5	7	7	9	5	6	5	6	5	5	7	4	1	3	2	3	3	4	4	3	3	1	1	4	3	2	1	2	1
2	4	5	5	5	6	6	5	3	2	4	7	5	4	5	2	5	5	5	5	3	5	5	2	1	2	2	3	2	2	2	3	1	1	1	3	3	1	3	3	5
2	2	3	7	4	1	7	3	5	2	2	7	7	5	6	5	1	3	5	1	6	5	6	2	1	1	1	1	1	2	2	1	2	1	1	1	3	1	1	1	2
2	6	5	5	4	6	7	5	7	5	4	7	5	7	5	7	5	5	5	5	6	5	7	3	2	2	2	1	2	1	2	1	1	1	3	1	2	3	2	2	3
2	5	7	9	5	1	9	7	3	5	1	5	9	3	5	1	1	1	9	5	1	5	7	2	4	2	2	4	1	4	2	3	1	4	3	1	1	2	4	2	6
2	5	5	5	5	6	5	5	5	5	5	5	5	5	5	6	5	3	5	5	5	4	5	2	3	2	1	1	1	1	1	1	1	3	2	1	1	1	3	1	4
2	4	5	5	5	4	5	5	5	5	5	6	5	4	5	3	3	2	5	5	5	4	5	2	3	1	2	3	1	3	2	2	1	3	2	1	2	3	3	1	5
2	7	7	6	3	3	5	7	8	7	2	5	6	7	7	3	3	2	7	8	6	4	6	3	1	2	2	3	3	3	2	1	3	1	1	2	2	3	1	1	1
2	8	8	5	4	7	7	4	4	2	5	6	6	9	5	8	4	2	5	4	5	6	6	3	2	4	3	3	4	3	2	2	4	2	1	3	2	2	3	3	1
2	1	2	6	2	1	8	4	5	3	8	9	9	9	8	1	1	1	1	1	7	5	7	1	4	1	1	2	2	2	2	1	3	4	3	1	2	3	3	2	5
2	4	5	5	5	4	5	5	5	5	5	6	5	4	5	3	3	2	5	5	5	4	5	2	3	1	2	3	1	3	2	2	1	3	2	1	2	3	3	1	5
2	3	3	5	7	3	9	3	5	1	3	8	9	5	6	3	1	1	7	1	8	4	5	2	1	2	1	2	2	2	2	1	2	1	1	1	2	1	3	1	3
2	5	4	4	3	7	5	6	8	5	4	5	6	7	5	6	3	4	4	6	4	4	6	2	3	2	2	3	2	3	2	2	2	3	3	2	2	4	4	2	6
2	1	1	5	1	1	9	1	1	1	5	5	9	1	1	1	1	1	5	1	5	1	5	4	4	1	2	4	1	1	2	1	1	4	4	1	1	3	4	2	6
2	2	2	6	2	1	7	7	8	1	6	9	9	9	9	1	1	1	2	1	8	1	8	4	1	2	1	3	1	4	2	1	3	1	1	2	2	3	1	2	2
2	5	5	5	5	5	6	5	3	3	5	7	5	3	5	3	3	1	5	3	5	5	7	1	3	2	1	2	1	1	1	1	1	3	2	1	1	1	3	1	3
2	4	4	5	5	4	5	5	4	3	5	5	5	4	5	3	5	3	5	5	5	4	5	2	3	1	2	2	1	3	2	2	1	3	3	1	2	3	3	2	5
2	9	9	9	9	9	9	9	9	9	9	9	9	9	9	9	9	9	9	9	9	9	9	3	2	4	3	4	4	4	4	4	4	3	4	4	4	2	2	2	5
2	5	5	5	5	6	5	5	5	6	5	5	5	5	5	3	5	3	5	5	5	5	5	2	1	1	3	1	2	1	2	1	2	2	2	1	2	4	2	1	4
2	9	1	5	1	9	5	9	9	9	1	6	5	9	5	1	2	7	7	9	9	9	7	4	1	4	4	4	4	4	4	4	3	1	1	4	2	4	1	4	1
2	5	5	5	1	9	5	5	3	4	1	5	5	4	5	4	1	1	6	1	5	5	5	4	3	2	3	3	1	3	3	2	1	2	1	2	3	1	2	2	1
2	7	7	3	8	6	5	6	6	6	7	7	1	8	1	5	5	5	5	5	7	5	5	2	1	1	2	2	2	2	1	2	1	3	3	2	2	2	1	2	3
2	6	7	5	1	2	5	1	4	3	1	6	5	5	5	5	3	5	1	5	5	5	6	3	1	2	1	3	1	3	2	1	1	1	1	3	2	1	1	1	1
2	5	5	5	4	3	6	4	4	4	3	6	6	5	5	4	4	4	5	5	4	4	6	3	2	2	1	3	2	3	3	2	1	3	2	2	2	3	2	1	1
2	7	7	3	8	6	5	6	6	6	7	7	1	8	1	5	5	5	5	5	7	5	5	2	1	1	2	2	2	2	1	2	1	3	3	2	2	2	1	2	3
2	7	5	5	5	9	6	5	4	5	5	6	5	5	5	3	3	3	7	5	5	4	5	3	2	3	3	1	1	2	1	1	1	3	2	1	2	3	3	2	5
2	7	7	1	7	8	2	5	2	1	5	5	5	5	5	1	1	3	5	1	4	3	5	3	4	3	3	3	3	3	2	1	1	4	1	2	3	3	3	2	5
2	5	1	4	1	7	4	2	9	3	1	1	5	1	1	1	5	5	5	5	5	5	5	1	1	1	1	1	1	1	1	1	1	1	1	1	2	1	2	1	1
2	1	3	6	1	2	9	2	3	1	5	5	7	3	8	2	1	1	7	1	7	5	7	1	1	2	1	2	1	2	1	1	1	1	1	1	2	1	1	2	2
2	7	8	5	5	9	5	8	5	5	5	5	7	5	7	9	5	5	5	5	3	5	5	2	2	4	3	3	3	1	4	3	1	2	2	4	1	1	4	2	3
2	4	4	5	5	4	5	4	4	4	5	5	5	4	5	4	4	4	5	5	5	4	5	2	1	2	2	2	2	2	2	2	2	2	2	2	2	2	2	1	4
2	6	4	3	6	9	1	9	4	9	4	1	1	3	1	9	9	9	1	6	1	6	1	3	2	3	2	3	3	3	2	2	3	3	2	2	1	3	3	2	5
2	8	8	5	8	9	7	7	5	5	5	7	6	8	7	3	5	5	5	6	6	6	8	2	3	4	4	4	3	3	4	4	4	2	2	3	2	2	2	3	2
2	4	6	8	4	7	8	3	7	3	4	8	8	7	8	4	4	3	7	7	8	5	8	4	2	4	4	4	3	3	3	4	3	3	2	3	3	2	2	3	3
2	6	5	5	5	9	5	8	2	9	2	5	5	9	5	9	5	9	5	5	5	9	5	3	1	4	4	3	4	3	2	2	4	1	1	2	2	4	2	3	4
2	5	4	5	5	5	6	5	3	5	3	5	5	5	5	1	5	5	5	3	6	5	5	2	1	1	1	2	1	2	2	1	1	1	1	1	1	3	1	1	4
2	7	5	5	3	9	2	5	5	9	1	2	5	3	5	1	1	1	1	1	1	5	7	3	1	2	2	2	3	3	2	3	2	2	2	2	2	3	1	3	2
2	8	6	5	6	9	5	8	5	9	5	5	5	8	5	2	1	2	5	9	5	5	5	3	2	4	3	2	3	3	4	3	3	2	2	3	3	2	2	3	3
2	1	1	6	1	1	6	2	5	1	2	5	5	2	6	6	1	1	5	1	5	5	5	3	1	1	1	2	1	2	1	1	1	1	1	1	2	2	3	2	3
2	6	3	6	3	1	5	3	3	3	6	5	6	9	5	6	2	5	2	5	6	6	6	2	2	1	2	2	2	3	1	1	4	2	1	1	1	4	4	3	1
2	3	3	5	5	7	5	6	2	7	5	8	5	1	5	7	6	1	1	5	5	5	7	2	3	3	1	3	2	2	3	3	1	3	2	1	1	3	3	2	4
2	9	9	5	1	3	5	9	3	9	2	5	5	1	4	1	5	2	9	1	5	3	5	4	4	4	4	2	3	2	4	2	1	2	1	3	2	1	3	2	3
2	2	3	6	4	1	6	3	1	1	5	6	5	4	6	2	2	3	5	5	6	4	6	3	1	1	1	3	1	3	1	1	2	1	1	2	2	2	3	1	3
2	8	5	6	3	9	5	8	4	1	3	6	6	1	5	6	1	4	9	1	3	1	7	3	2	4	4	3	4	4	4	3	4	2	1	3	3	2	4	3	4
2	4	5	5	5	9	5	7	5	1	5	5	5	5	5	3	5	5	5	7	4	5	5	2	1	3	2	3	3	2	1	1	2	1	1	2	1	4	1	3	1
2	6	8	2	2	6	3	2	1	6	1	5	5	6	2	1	3	5	6	6	5	5	6	1	3	2	1	3	2	3	3	1	1	2	1	2	3	2	2	2	1
2	6	7	5	7	9	5	6	5	4	5	5	5	6	5	5	6	2	6	5	5	4	5	3	2	4	2	1	3	1	3	2	2	4	2	1	1	1	4	3	5
2	4	8	6	6	9	8	8	4	2	2	8	8	2	8	9	9	9	4	4	8	4	8	2	1	4	4	4	1	4	4	3	1	1	1	3	3	1	4	3	3
2	8	8	4	5	9	5	9	3	7	1	5	5	5	5	7	1	1	6	1	5	1	5	3	1	4	2	3	3	4	3	4	2	2	1	3	4	4	4	4	3
2	3	3	5	4	2	5	4	4	3	5	5	5	5	5	4	3	5	5	4	5	4	5	2	2	1	1	2	1	3	2	2	1	3	2	2	2	2	3	2	2
2	5	5	5	5	8	5	8	3	3	5	5	5	7	5	3	3	2	5	5	6	5	5	4	2	4	1	3	2	2	1	1	1	3	1	1	1	3	4	1	3
2	2	7	5	4	7	5	6	4	7	4	5	6	6	5	4	4	5	5	1	5	4	5	1	2	3	1	1	2	1	1	1	1	1	2	1	1	4	4	1	5
2	3	5	5	5	6	7	4	5	3	5	7	6	7	6	5	5	4	5	5	6	5	6	2	3	3	2	2	2	2	1	3	1	4	4	3	3	3	2	3	6
2	6	4	5	5	7	5	3	5	6	4	5	6	5	6	3	6	5	5	4	4	5	5	3	4	3	4	2	3	2	2	3	2	4	3	3	3	4	4	4	6
2	8	5	5	6	9	5	8	8	9	6	5	5	7	5	4	3	9	5	7	5	5	5	3	3	4	2	3	4	3	2	2	3	4	4	2	2	1	2	3	4
2	9	5	5	5	9	6	9	6	9	5	5	5	7	5	4	5	5	5	5	6	5	5	4	1	4	3	3	3	3	2	2	3	1	1	2	2	4	2	4	6
2	8	7	8	7	9	8	5	5	8	5	5	5	9	6	8	3	3	5	3	7	5	5	2	4	3	2	1	3	3	1	2	3	4	3	2	1	4	3	2	6
2	7	5	5	6	6	5	5	5	4	4	6	5	5	5	4	5	4	4	8	7	5	6	3	3	3	2	2	3	2	2	2	2	4	3	1	2	3	2	2	6
2	2	2	3	1	2	6	1	7	4	1	7	7	7	6	2	3	1	7	1	5	2	6	3	1	2	3	3	1	4	4	3	2	1	1	3	2	2	2	2	1
2	9	9	5	5	9	5	5	5	7	5	5	5	6	5	3	5	5	5	6	5	5	5	3	4	4	4	2	4	2	1	3	3	4	3	2	2	3	3	3	5
2	9	9	9	9	9	9	9	9	9	9	9	9	9	9	9	9	9	9	9	9	9	9	4	1	4	4	4	4	4	4	4	4	3	1	4	4	4	2	4	4
2	5	5	5	5	7	5	6	4	5	5	5	5	7	5	6	5	7	5	5	5	5	5	3	1	3	1	2	2	1	2	1	2	3	3	1	2	4	2	2	6
2	9	5	7	5	9	9	5	1	9	5	5	9	6	6	3	1	1	5	1	5	5	9	3	3	4	4	3	4	1	3	1	4	3	1	1	2	3	3	3	4
2	6	5	5	7	8	6	5	3	2	2	5	5	5	5	2	4	2	5	5	6	5	6	2	1	3	1	1	2	1	3	2	1	1	1	1	2	3	2	1	4
2	2	2	7	2	2	5	3	3	2	5	5	5	5	5	4	3	1	4	2	5	2	5	3	1	2	1	1	1	3	3	2	1	1	1	2	2	3	2	1	2
2	9	8	5	7	9	5	7	8	9	9	4	4	9	4	4	1	1	7	1	7	1	5	3	4	4	1	2	1	1	3	1	1	3	3	1	2	3	4	2	5
2	3	3	5	6	8	5	6	5	2	2	5	5	4	5	6	2	1	6	1	5	5	6	2	3	3	2	3	1	2	2	2	3	3	1	3	2	3	4	2	5
2	9	9	4	7	9	4	9	7	7	6	7	6	9	6	9	9	7	8	9	1	7	4	2	2	4	2	3	4	2	2	1	3	2	1	2	2	2	3	3	2
2	7	5	5	5	9	5	5	6	7	5	5	5	8	5	6	4	5	4	5	5	6	5	3	3	4	1	1	4	2	1	1	4	3	2	1	3	1	3	2	2
2	5	5	5	5	6	5	5	5	5	5	5	5	5	5	4	5	5	5	5	5	5	5	3	3	3	1	2	1	2	2	1	1	3	2	1	2	2	3	2	5
2	4	5	5	5	2	5	5	5	6	5	5	5	4	5	5	5	4	3	5	5	5	5	2	3	2	2	2	2	2	3	2	2	3	2	2	2	1	3	2	5
2	6	5	5	5	1	5	7	7	6	3	5	5	6	5	3	1	1	4	1	5	2	5	3	2	3	2	2	3	3	2	3	3	3	1	2	2	3	2	2	2
2	5	5	5	5	5	9	3	5	5	1	5	8	5	8	1	1	2	5	5	8	5	8	3	1	1	1	4	1	3	1	1	1	1	1	2	2	3	1	3	3
2	1	3	5	5	5	7	3	3	1	1	7	5	5	5	1	1	1	3	5	7	1	7	2	1	2	1	3	1	1	3	1	1	1	1	2	2	1	4	2	1
2	3	4	4	5	8	6	4	3	2	5	8	7	8	7	6	1	1	3	1	6	6	6	4	3	4	3	3	2	4	3	3	3	3	1	3	3	2	2	3	3
2	8	8	3	5	9	4	9	8	8	5	5	4	8	5	3	3	3	3	5	3	4	4	4	1	4	3	3	3	3	2	2	3	2	1	2	2	3	3	4	4
2	4	4	6	4	7	6	5	3	3	3	6	6	5	6	3	3	2	3	3	4	4	6	3	3	3	1	2	2	2	1	1	2	3	3	2	1	2	3	2	3
2	7	5	6	6	8	5	4	4	4	5	6	5	6	5	7	4	4	5	5	6	5	5	3	1	4	2	3	2	3	3	3	2	1	1	3	4	2	1	3	2
2	5	5	5	7	9	5	6	9	6	9	3	5	8	4	9	9	1	9	9	5	1	6	1	1	4	2	1	4	3	4	1	3	4	2	1	2	3	4	2	4
2	6	5	7	5	7	5	4	4	4	5	5	5	7	5	3	3	3	6	3	5	4	6	2	1	3	1	2	3	3	3	4	3	1	1	4	3	2	2	1	5
2	5	5	5	5	2	5	5	6	5	4	6	5	5	5	3	3	2	4	2	5	4	6	3	3	2	2	2	2	2	3	3	1	3	2	1	1	3	2	1	4
2	1	1	7	1	9	7	3	2	1	1	5	7	3	6	7	3	1	7	1	7	1	9	2	4	4	2	2	1	2	1	2	2	4	2	2	1	4	4	2	6
2	4	4	6	4	7	7	4	4	4	4	7	7	5	6	8	4	4	8	4	6	5	6	2	2	3	1	2	1	4	2	1	2	3	4	2	1	2	2	1	5
2	5	5	5	5	6	5	5	5	5	5	5	5	5	5	6	5	5	5	5	5	5	5	2	1	3	2	1	1	1	2	2	1	2	2	1	1	3	1	1	3
2	1	1	5	7	1	1	9	1	1	1	5	9	5	1	9	1	1	1	1	9	1	5	2	1	1	1	1	1	3	2	1	1	1	1	1	2	1	4	1	1
2	6	7	5	3	9	7	9	6	7	7	5	5	6	5	9	7	8	6	6	5	7	7	3	1	4	3	2	4	2	2	1	2	3	1	2	3	1	3	4	3
2	8	8	5	9	9	5	7	7	8	3	4	3	6	5	7	9	7	5	7	3	7	4	3	1	4	2	3	4	3	2	2	4	2	2	2	2	2	2	2	2
2	5	5	5	5	5	5	5	5	5	5	5	5	5	5	5	5	5	5	5	5	5	5	2	1	2	2	2	2	3	1	1	1	1	1	1	2	3	2	1	2
2	6	5	5	7	8	8	6	7	8	3	5	5	4	5	5	3	5	4	7	4	7	5	4	3	4	4	4	3	4	2	3	1	2	1	2	3	2	2	4	2
2	5	5	5	5	7	6	7	5	6	5	7	5	7	6	6	5	4	5	6	6	6	5	3	3	3	3	3	2	3	3	2	2	2	2	2	2	3	2	2	4
2	3	1	6	2	7	8	3	6	4	1	2	7	5	8	1	3	3	8	2	5	5	7	2	1	3	2	3	2	3	2	2	2	1	2	2	1	4	2	2	6
2	3	4	8	5	9	9	5	5	5	3	8	9	3	9	8	2	1	8	2	9	3	8	4	3	2	1	2	1	4	2	4	1	2	1	3	2	4	3	2	3
2	7	7	5	5	6	5	5	3	3	5	5	5	4	7	7	3	2	5	5	5	3	5	4	2	3	2	3	2	3	2	1	1	3	3	2	2	3	3	2	4
2	9	9	3	9	7	2	1	5	9	1	6	5	2	5	1	1	1	5	2	5	1	9	3	4	4	2	4	4	2	3	4	1	4	1	2	2	2	2	3	3
2	9	5	7	5	9	7	9	1	9	5	5	5	7	5	5	5	5	3	7	3	5	6	2	2	4	3	3	4	2	2	2	2	3	4	2	3	3	4	3	5
2	6	3	5	4	8	5	3	6	3	8	7	5	5	6	1	3	5	5	2	6	4	5	2	1	3	2	2	3	1	4	4	3	3	1	1	2	4	3	2	3
2	2	4	5	5	6	6	5	2	1	3	4	6	4	5	7	3	3	5	2	5	4	6	2	2	2	1	3	1	2	1	2	2	2	2	1	2	3	3	2	4
2	9	9	5	5	9	7	9	5	9	1	5	5	7	6	9	1	1	7	1	4	1	5	4	3	4	4	4	3	4	3	4	2	3	4	4	4	3	4	3	6
2	1	9	4	3	9	5	9	7	1	6	4	3	8	2	1	1	1	6	1	5	4	6	3	2	4	4	2	2	3	3	2	4	4	1	2	2	3	3	4	4
2	1	4	5	4	2	6	4	6	4	5	6	5	7	5	4	1	3	5	3	6	4	6	2	1	3	1	3	2	2	2	1	2	2	1	3	3	2	2	1	1
2	8	3	5	7	8	5	3	7	8	2	5	5	4	5	3	3	7	5	7	5	3	5	2	2	3	2	1	3	1	2	2	1	2	1	4	2	3	3	2	4
2	1	2	5	3	4	6	5	4	1	2	6	8	6	7	2	1	1	5	1	6	4	7	4	3	2	3	4	1	4	2	2	2	3	4	3	1	3	3	3	3
2	1	1	5	1	7	9	1	1	1	5	5	5	9	9	1	1	1	9	1	9	1	9	1	1	3	1	3	1	3	2	2	3	1	1	2	1	3	2	2	6
2	7	7	5	4	9	7	4	3	8	1	5	5	3	5	2	1	1	8	1	5	2	5	3	2	4	3	4	3	3	3	3	2	2	1	3	3	3	3	2	2
2	8	9	7	9	9	9	9	7	9	3	5	4	7	5	7	3	8	3	5	2	8	7	4	1	4	4	4	4	3	4	3	4	1	1	4	4	2	1	4	1
2	4	3	5	5	4	5	5	6	2	5	7	5	7	5	6	4	1	5	5	4	5	5	3	1	3	1	3	1	3	3	1	2	1	1	1	2	3	2	2	1
2	7	6	1	4	9	5	8	1	9	3	5	5	1	6	1	1	1	4	5	7	4	8	1	4	4	4	1	3	1	1	1	1	4	1	1	1	2	3	1	3
2	9	9	5	9	9	5	9	9	9	5	5	5	5	5	5	5	5	5	9	5	9	5	3	1	4	4	4	4	3	4	4	4	1	3	3	2	3	4	3	1
2	3	5	5	3	8	5	2	4	4	5	5	6	5	5	2	5	5	6	3	5	2	5	2	1	3	1	1	1	2	3	1	1	1	1	3	2	3	4	1	3
2	3	5	5	7	7	6	2	5	3	5	5	7	4	5	8	4	1	6	5	7	5	7	4	3	4	2	4	2	3	2	1	1	4	3	2	3	3	4	1	5
2	7	5	5	6	7	5	6	4	6	5	5	5	4	5	5	5	5	5	5	5	5	5	2	3	3	1	2	2	3	1	1	1	2	2	1	1	2	2	1	4
2	5	5	5	5	9	5	5	5	5	5	7	5	7	5	5	5	5	5	5	6	5	6	3	1	3	4	3	1	3	3	3	2	1	1	2	3	3	3	2	2
2	3	3	5	5	2	5	4	5	1	3	5	5	5	5	2	5	3	5	5	5	5	5	2	1	1	1	2	1	2	2	3	1	1	1	1	2	2	2	2	2
2	6	6	5	5	4	5	4	4	4	4	5	5	4	5	4	3	4	6	3	5	5	6	2	1	2	1	2	2	2	2	2	2	2	2	1	2	2	1	1	2
2	4	5	5	5	3	7	5	5	5	5	8	6	5	5	5	5	1	6	4	5	5	6	3	1	1	2	2	1	2	2	3	1	1	1	2	3	1	3	2	2
2	8	8	5	4	8	5	8	5	8	3	5	5	5	5	3	8	4	2	8	5	4	6	3	1	3	2	3	4	3	4	3	2	3	2	3	4	2	2	2	3
2	3	3	5	5	3	6	5	4	6	3	7	7	5	5	1	2	1	6	2	7	5	7	1	3	2	2	1	2	1	2	1	2	4	4	2	1	4	4	1	5
2	7	7	5	7	9	5	7	4	5	4	7	9	6	7	4	4	4	6	5	7	4	5	4	1	4	4	3	2	2	2	1	2	1	1	2	2	1	2	3	1
2	8	4	5	5	9	5	6	6	8	2	5	5	6	5	2	2	1	7	1	5	4	7	3	3	4	3	4	3	2	2	3	4	3	2	3	2	2	4	3	6
2	1	1	5	1	9	6	9	1	1	1	5	5	3	5	1	1	1	5	5	6	3	7	3	3	3	2	2	1	3	2	1	2	3	2	3	2	2	3	2	4
2	6	5	5	5	8	5	5	1	5	5	6	5	7	5	1	5	5	5	5	3	5	5	3	1	3	1	2	2	3	1	1	3	1	1	1	1	1	2	1	1
2	7	7	5	5	7	5	6	7	7	3	5	5	8	7	4	9	4	9	5	6	5	5	3	1	3	2	3	3	4	3	2	1	1	1	2	3	4	2	3	4
2	2	2	7	7	9	7	7	7	1	1	5	5	3	5	9	3	1	5	3	5	5	5	2	4	4	3	3	1	2	1	3	1	4	4	1	1	3	4	3	7
2	6	1	6	3	1	7	5	3	1	3	9	9	9	7	1	1	1	8	3	9	1	9	3	1	2	1	4	1	4	3	1	2	1	1	2	2	1	1	1	1
2	5	6	5	7	7	6	7	5	3	4	5	5	6	7	5	4	1	7	1	6	6	6	4	3	3	2	2	2	3	4	2	4	3	3	2	2	3	2	3	5
2	1	1	5	1	1	5	1	2	1	2	5	5	1	5	1	1	1	5	1	5	1	5	1	1	1	1	1	1	1	1	1	1	1	1	1	1	1	1	1	1
2	6	7	5	6	6	5	5	5	5	5	6	5	5	5	5	5	5	6	5	5	5	6	4	2	2	3	3	2	3	2	4	1	3	2	3	3	3	3	3	6
2	5	5	5	5	5	5	5	5	5	5	5	5	5	5	5	5	5	5	5	5	5	5	2	3	1	1	1	1	1	1	1	1	3	1	1	1	3	3	1	4
2	6	4	3	5	9	8	9	9	9	3	4	3	4	4	8	2	5	5	1	1	9	3	3	4	4	3	2	3	2	2	2	2	2	2	2	3	2	2	3	5
2	5	7	4	7	9	5	9	6	5	5	5	5	7	5	9	5	4	4	5	4	5	5	2	3	4	3	2	3	1	1	2	3	3	4	2	3	3	2	4	5
2	5	5	5	5	3	5	5	7	5	5	5	5	5	5	5	5	5	5	5	5	5	5	3	1	1	2	2	1	3	2	4	1	1	1	3	2	1	4	1	1
2	6	4	3	5	9	8	9	9	9	3	4	3	4	4	8	2	5	5	1	1	9	3	3	4	4	3	2	3	2	2	2	2	2	2	2	3	2	2	3	5
2	9	8	5	8	9	5	9	6	9	4	6	5	9	4	4	3	3	4	7	5	6	5	3	1	4	1	3	3	3	2	1	4	3	1	2	2	3	3	1	1
2	5	6	5	5	6	5	6	6	5	5	5	5	4	5	6	4	5	5	5	4	5	5	4	1	2	1	2	1	3	4	4	1	1	1	3	3	3	1	2	1
2	1	1	5	7	7	6	7	9	6	8	7	6	9	4	1	7	1	7	3	4	4	5	2	2	3	1	4	1	4	3	1	4	3	1	1	1	1	3	2	1
2	2	6	5	6	1	7	2	5	2	2	7	8	1	7	2	2	1	5	5	4	1	5	4	4	2	2	4	2	4	4	3	2	1	1	3	3	1	1	3	1
2	6	6	5	4	6	7	4	2	1	5	6	5	7	7	1	1	1	5	5	3	5	5	1	1	2	1	3	2	2	1	1	3	1	1	2	1	1	1	2	7
2	1	4	5	6	1	6	5	5	1	2	5	5	1	5	3	1	1	5	2	5	5	7	2	1	1	2	3	1	3	2	2	1	1	1	1	2	2	1	3	1
2	3	5	7	4	2	6	4	5	4	1	7	5	5	5	1	2	5	5	3	5	3	5	1	1	1	1	2	1	2	2	2	1	1	1	2	1	1	2	1	1
2	3	5	5	5	3	5	5	5	2	4	6	6	4	6	4	5	1	5	5	5	3	5	1	1	1	1	2	1	2	1	1	1	1	1	1	1	1	1	2	2
2	5	5	5	5	5	5	7	5	5	5	5	5	5	5	3	5	5	5	5	5	5	5	1	1	1	1	1	1	1	1	1	1	1	1	3	4	4	1	2	1
2	3	5	5	4	9	5	5	4	2	5	5	5	7	5	3	3	1	5	9	2	5	5	2	1	4	1	3	1	3	3	3	3	1	1	2	3	1	1	2	1
2	5	6	5	6	6	5	6	7	5	5	6	5	6	5	5	5	5	5	5	5	5	5	2	3	2	1	1	1	2	1	1	1	4	1	1	3	3	2	1	4
2	7	7	5	7	9	5	9	6	9	1	5	5	5	5	9	7	5	5	5	5	6	5	3	1	4	3	2	3	2	2	2	2	1	1	2	2	1	2	3	1
2	3	5	5	5	4	5	3	5	1	5	5	5	5	5	6	5	6	5	6	5	3	5	1	1	2	2	1	1	2	2	2	2	1	1	1	2	3	3	2	3
2	8	8	5	6	9	7	6	5	8	5	5	5	5	5	7	5	5	7	5	5	5	5	4	2	4	3	4	3	4	3	3	4	1	1	3	3	3	2	3	1
2	6	7	4	5	7	5	7	7	7	5	5	5	5	5	6	3	5	4	5	4	5	5	2	3	2	2	2	3	2	3	3	2	3	3	2	2	3	2	2	6
2	3	5	5	3	6	7	6	4	5	5	6	5	3	5	2	5	5	5	5	3	5	6	2	2	2	1	2	1	2	2	3	2	3	3	3	2	1	3	2	3
2	7	6	5	6	7	5	5	4	6	5	5	5	6	5	6	5	5	5	6	5	4	5	2	2	3	2	2	3	3	2	2	2	2	2	2	2	2	3	2	3
2	6	5	5	5	4	6	5	5	5	5	5	5	5	5	4	5	5	5	5	6	5	6	2	2	2	2	3	2	2	2	2	2	2	2	3	3	3	3	2	4
2	1	1	9	1	1	9	1	1	1	5	9	9	5	9	1	5	1	9	1	9	1	9	3	1	1	2	2	1	1	1	1	1	1	1	1	2	1	1	1	1
2	9	6	5	5	9	5	9	9	9	5	5	5	9	5	9	9	5	5	5	5	5	5	4	1	4	4	2	4	4	1	1	1	1	1	1	1	4	2	4	1
2	1	1	7	1	1	7	1	4	1	1	7	5	1	7	3	1	1	5	5	7	1	7	2	1	1	1	1	1	1	1	1	1	1	3	1	2	4	3	1	6
2	3	3	5	5	9	6	2	2	2	5	7	6	2	6	7	3	1	3	5	5	2	7	3	1	4	4	3	4	4	2	4	2	1	2	3	4	3	2	3	1
2	6	5	5	5	7	5	7	5	7	5	5	5	4	5	5	5	5	5	5	4	5	5	2	2	3	4	2	2	2	1	1	1	3	1	1	2	2	3	2	3
2	8	6	5	3	8	5	7	5	3	5	5	6	5	3	3	3	2	4	5	4	5	6	2	1	3	2	3	2	3	3	4	2	3	1	2	2	2	3	3	1
2	5	6	3	6	7	3	5	4	6	2	7	3	5	5	6	2	4	3	5	2	4	4	3	1	2	1	2	2	2	1	2	1	1	1	1	2	1	4	3	2
2	1	9	5	1	9	5	6	3	1	5	7	6	5	5	3	4	1	5	1	5	3	5	1	2	4	4	1	1	1	3	2	2	2	1	1	1	1	3	3	3
2	7	8	8	2	9	7	1	5	3	1	5	5	4	7	3	2	1	5	2	6	1	8	4	2	4	3	4	1	4	2	3	1	3	2	2	2	4	3	3	4
2	4	5	5	5	5	6	5	3	4	5	5	5	6	5	5	5	5	5	5	5	5	5	2	2	2	1	2	2	2	2	1	1	1	2	1	2	3	2	2	4
2	4	7	6	3	8	5	5	4	4	2	6	7	3	5	7	4	5	4	5	7	5	5	3	1	3	4	3	2	2	1	1	1	1	1	1	2	3	1	2	1
2	4	4	6	6	7	6	6	6	4	4	4	5	3	7	7	5	3	3	5	4	6	6	3	3	2	2	3	2	3	2	1	2	3	1	2	2	1	2	3	2
2	3	2	7	5	1	7	5	4	5	4	7	5	7	5	3	5	5	7	5	6	5	5	2	1	1	1	1	1	1	1	1	1	1	1	1	2	2	1	1	3
2	6	6	5	5	5	5	5	7	5	5	7	5	6	6	5	5	5	5	4	6	5	5	2	3	1	1	2	2	3	2	4	1	4	4	3	2	3	3	1	4
2	5	6	4	2	8	4	2	1	1	6	7	3	9	5	7	5	5	6	5	1	5	5	2	1	4	4	3	1	2	1	1	3	1	1	4	3	1	3	1	3
2	8	7	5	5	9	3	7	4	8	3	3	5	5	5	7	8	5	4	9	1	9	4	3	2	3	2	2	3	1	2	2	2	2	3	3	3	2	3	3	6
2	2	5	6	5	3	6	4	5	1	4	5	6	5	5	5	3	2	5	2	5	4	5	3	2	2	2	2	1	2	2	1	2	2	1	2	2	2	2	2	3
2	5	5	6	5	8	7	5	7	5	5	6	7	5	5	5	5	2	7	1	5	5	6	4	4	3	4	4	3	4	4	4	2	4	4	3	3	4	2	4	6
2	1	3	5	3	1	6	5	5	1	3	7	5	5	7	4	3	1	5	1	6	5	6	2	1	1	2	3	1	4	3	1	3	2	3	1	1	3	2	2	3
2	4	4	5	2	1	7	2	4	2	5	5	5	6	5	6	1	1	6	2	7	3	6	2	1	2	2	3	1	3	2	2	2	1	3	1	2	2	2	2	4
2	5	6	4	3	7	5	6	2	2	2	4	5	4	5	3	2	3	5	3	4	3	6	2	1	2	2	1	1	1	1	1	1	2	1	2	1	3	2	2	3
2	5	5	6	5	5	8	5	4	5	5	9	6	5	7	5	5	5	9	4	8	5	6	1	1	2	1	1	2	1	1	1	1	1	1	1	1	1	4	1	2
2	5	5	5	5	9	5	9	5	7	7	5	5	7	5	9	5	7	5	5	1	6	5	4	2	4	4	4	2	3	3	3	2	2	2	3	2	4	1	3	1
2	7	7	5	8	9	5	8	2	7	2	5	5	2	5	9	4	5	5	5	5	5	5	2	1	4	4	1	3	1	2	4	1	2	1	1	2	3	1	3	3
2	4	4	5	2	1	7	2	4	2	5	5	5	6	5	6	1	1	6	2	7	3	6	2	1	2	2	3	1	3	2	2	2	1	3	1	2	2	2	2	4
2	7	5	5	7	9	6	3	4	2	5	5	6	5	5	5	5	6	8	5	5	3	6	4	1	3	3	3	2	1	2	4	2	3	3	3	2	2	3	2	3
2	5	5	5	5	5	5	6	6	5	5	6	5	5	5	5	5	5	5	5	5	5	5	1	2	1	1	1	1	1	4	2	1	3	1	1	2	2	1	2	2
2	1	1	3	6	1	6	5	1	1	6	7	6	6	6	1	7	2	7	1	4	1	7	3	1	1	3	2	1	4	4	2	3	1	1	4	3	1	1	1	3
2	3	4	7	2	5	7	3	5	2	2	5	7	5	6	2	2	2	2	2	2	2	7	2	3	1	2	2	2	3	2	3	2	4	4	4	2	4	4	2	7
2	2	5	5	7	8	6	6	3	3	5	5	5	4	5	7	2	1	7	1	5	7	7	2	1	3	2	2	1	2	3	2	3	1	1	2	2	1	2	2	2
2	7	3	1	5	9	6	7	5	7	9	3	5	8	4	9	7	9	6	9	5	7	4	3	3	4	3	2	4	3	4	3	4	2	2	3	2	3	2	4	4
2	5	5	5	6	7	8	8	9	9	5	7	5	1	5	5	5	3	5	5	7	5	5	3	3	3	3	3	2	3	3	3	3	3	1	1	2	1	3	2	3
2	4	7	6	5	7	7	3	5	4	7	5	7	3	5	7	5	7	5	5	4	3	5	2	2	3	2	2	3	3	2	2	2	3	3	2	2	2	3	3	5
2	7	7	5	4	9	6	7	6	8	5	7	5	9	6	5	4	4	6	5	7	5	6	3	2	4	3	2	3	2	3	4	3	2	3	2	1	2	3	3	5
2	7	6	5	5	9	5	6	6	7	5	5	5	5	5	5	5	5	5	3	5	5	5	3	2	3	3	2	4	3	1	2	2	3	1	1	1	2	3	4	1
2	6	6	5	5	9	5	6	4	6	5	7	5	6	5	3	5	4	5	6	1	5	5	4	2	4	4	2	2	3	1	2	2	2	2	2	1	1	2	2	2
2	7	7	5	7	1	5	7	1	5	5	5	5	1	5	1	1	1	5	1	5	5	5	2	4	1	2	3	2	3	4	4	1	4	1	4	3	1	2	2	2
2	9	9	6	1	9	9	9	1	1	5	5	5	6	7	5	1	1	5	5	6	9	7	2	1	4	1	4	4	3	1	2	3	2	1	1	2	2	3	1	3
2	6	3	5	5	8	5	6	3	3	3	5	5	3	5	7	5	3	5	6	5	3	5	3	3	3	2	2	2	3	2	2	2	2	3	2	2	1	2	2	4
2	7	7	5	5	8	5	6	1	2	5	5	5	6	5	7	5	7	5	1	5	3	5	2	1	3	2	3	3	2	1	1	2	2	1	2	3	2	3	2	3
2	3	5	7	5	9	8	5	7	1	5	7	5	8	9	9	1	1	9	1	7	1	9	1	1	4	4	1	1	2	3	3	3	1	1	1	1	1	1	2	2
2	5	5	5	5	7	5	6	5	4	5	5	5	6	5	4	3	4	6	5	5	5	7	2	3	3	2	3	1	1	1	1	1	2	2	2	3	2	3	2	4
2	9	1	5	1	9	5	9	9	9	1	5	5	8	5	1	1	1	1	5	5	9	9	2	1	4	4	4	4	2	3	2	4	1	1	3	2	1	2	3	1
2	3	6	5	4	7	6	3	6	2	1	6	7	6	5	6	3	3	5	5	4	3	6	3	2	4	2	2	1	1	2	2	3	2	1	3	2	1	3	2	3
2	3	7	5	4	8	5	3	6	3	7	5	7	6	7	7	3	2	7	3	7	6	5	1	2	3	2	2	3	2	2	1	2	3	1	1	2	1	3	3	3
2	5	3	5	5	4	6	6	4	6	5	5	5	6	6	3	3	2	5	5	6	3	5	1	4	2	2	2	1	1	2	1	1	3	2	1	2	1	3	2	3
2	1	3	9	3	3	6	2	6	2	3	9	9	5	6	1	1	1	3	2	5	3	6	2	1	2	2	3	2	1	2	2	1	1	1	2	1	1	1	2	8
2	7	4	6	6	1	7	3	4	2	1	7	5	4	6	1	3	1	6	3	6	3	7	2	1	1	2	3	3	2	2	1	4	3	2	1	2	1	1	2	2
2	6	5	5	4	7	5	5	4	5	5	6	5	5	5	6	5	7	4	6	5	5	5	3	1	2	3	2	2	2	2	2	2	2	2	2	2	3	2	2	4
2	6	5	5	4	7	5	5	4	5	5	6	5	5	5	6	5	7	4	6	5	5	5	3	1	2	3	2	2	2	2	2	2	2	2	2	2	3	2	2	4
2	5	5	5	1	3	4	1	1	1	1	6	5	1	5	1	1	1	5	6	1	1	1	2	4	2	2	1	1	1	2	3	1	4	4	2	2	4	4	2	5
2	1	4	5	6	9	5	3	1	1	5	5	6	5	6	1	6	1	5	1	7	2	6	2	2	3	1	2	1	2	1	1	2	2	2	1	1	4	1	1	2
2	3	6	6	7	8	8	4	6	5	5	7	7	8	8	2	2	2	2	1	6	5	5	3	3	2	2	3	2	3	4	3	3	3	3	2	2	3	3	3	5
2	9	7	5	5	9	5	9	1	1	1	5	5	5	5	1	1	1	5	3	7	1	7	3	1	4	1	2	3	1	2	1	3	1	1	1	2	2	3	2	1
2	4	5	6	5	7	5	5	3	4	5	7	5	5	5	4	1	1	5	1	6	5	5	2	1	2	2	3	2	3	3	2	1	1	1	1	2	2	3	1	2
2	7	6	5	3	7	7	5	3	3	2	8	8	3	5	3	2	2	6	5	5	3	5	3	1	3	2	3	2	3	2	1	1	1	1	2	2	1	3	2	3
2	4	5	6	5	7	5	5	3	4	5	7	5	5	5	4	1	1	5	1	6	5	5	2	1	2	2	3	2	3	3	2	1	1	1	1	2	2	3	1	2
2	6	5	5	5	9	5	6	5	5	5	5	5	8	5	8	5	1	1	5	1	4	5	3	2	4	2	2	4	4	2	2	3	2	1	2	3	2	3	3	5
2	3	5	6	6	7	5	7	3	1	7	5	5	2	6	3	5	2	3	1	5	5	6	3	3	3	2	2	1	3	1	1	3	2	1	1	3	2	2	2	1
2	2	3	6	2	5	5	3	5	3	5	7	5	5	5	5	2	7	2	2	7	7	5	4	4	2	2	4	1	2	2	3	2	4	3	3	2	2	2	3	4
2	4	4	5	4	4	5	4	4	4	5	6	5	2	5	4	4	5	6	3	5	5	6	2	1	2	2	4	2	2	3	4	1	1	1	4	4	2	3	3	1
2	3	5	5	5	8	6	4	4	3	5	6	5	4	5	4	5	4	6	5	5	5	5	2	1	4	2	2	1	2	2	1	2	1	1	2	2	2	3	2	1
2	7	5	1	6	8	3	6	3	6	5	2	2	5	3	6	7	2	2	7	2	6	5	3	4	3	3	2	4	3	1	2	1	3	1	3	1	3	3	4	5
2	5	6	1	1	9	7	1	1	1	1	7	7	2	7	1	7	1	1	1	5	2	5	4	3	4	1	3	2	4	1	1	4	1	1	2	2	1	3	1	1
2	7	7	5	7	7	5	7	3	3	3	6	5	7	5	7	1	1	3	1	5	3	5	3	2	3	2	1	2	2	1	1	1	2	2	1	1	1	2	2	3
2	3	5	5	7	2	5	5	4	2	5	7	5	4	5	5	4	4	6	4	5	5	5	2	1	1	2	3	2	3	3	2	1	2	2	3	2	3	2	2	2
2	3	3	5	3	6	5	2	4	2	3	5	6	2	5	3	3	5	6	5	5	3	5	2	1	2	1	1	1	1	2	1	2	1	1	1	3	1	1	1	1
2	5	5	2	5	9	6	2	4	7	3	7	5	8	5	3	3	5	8	8	5	5	7	4	2	4	2	2	4	3	2	4	3	2	2	1	1	3	3	2	3
2	1	3	5	5	1	5	1	4	1	4	5	5	5	5	2	2	1	5	1	5	5	5	1	1	1	1	1	1	1	1	1	1	1	1	1	2	2	3	2	3
2	7	3	5	8	8	5	2	1	1	5	5	6	2	7	2	1	4	5	5	6	2	5	2	4	4	2	2	4	4	3	1	4	3	2	2	1	3	3	3	3
2	3	3	5	4	4	5	3	4	3	4	5	5	5	5	4	4	4	5	5	5	4	5	3	1	2	2	3	1	3	2	2	3	1	1	3	2	2	2	3	1
2	5	5	5	5	7	5	5	3	5	5	5	5	5	5	2	5	5	5	5	5	5	5	2	1	2	1	1	1	1	1	1	1	1	1	1	2	2	3	1	1
2	8	4	5	4	9	6	5	9	8	5	7	5	9	5	5	5	5	3	5	8	5	5	3	3	4	2	2	3	2	2	2	2	2	1	3	3	1	4	3	3
2	1	7	1	1	7	3	9	5	1	6	6	5	3	3	8	7	2	5	6	1	6	5	2	3	3	2	2	2	3	2	3	2	4	1	2	1	1	2	2	3
2	7	5	3	6	9	4	6	1	5	1	5	5	5	5	6	1	3	3	5	6	5	6	3	2	4	3	1	3	3	4	2	3	3	1	3	2	2	3	2	1
2	3	5	5	4	2	6	5	4	2	5	7	5	4	5	3	5	5	5	5	7	5	5	3	4	1	1	1	1	3	2	1	1	2	1	1	2	1	1	1	1
2	7	1	5	2	4	5	6	2	6	4	5	5	7	5	2	1	3	4	4	5	1	6	2	3	3	1	3	3	3	2	1	3	3	3	1	1	3	2	2	3
2	3	3	2	7	3	6	8	5	4	3	5	5	3	6	8	2	2	5	3	5	5	5	4	3	4	4	4	4	4	3	2	3	4	2	3	3	3	4	4	5
2	1	1	7	5	2	9	5	2	1	5	8	5	5	7	1	1	1	7	1	7	4	6	3	3	2	2	3	1	4	4	2	2	3	3	2	2	2	2	3	4
2	8	7	3	5	9	6	6	4	7	5	6	5	8	5	5	7	7	5	5	3	6	6	3	2	3	3	3	3	3	2	3	3	3	3	4	3	3	2	3	2
2	5	6	5	5	9	6	7	3	7	5	5	5	5	2	2	2	1	5	5	9	5	7	2	1	3	1	1	1	2	1	1	1	2	2	1	2	2	3	1	5
2	8	8	8	8	8	5	6	5	8	4	5	5	8	5	4	4	4	5	8	6	8	5	3	2	3	1	3	4	4	1	1	4	2	3	1	2	3	2	3	5
2	3	3	5	3	1	5	5	5	5	2	5	5	3	5	2	2	1	5	2	5	5	5	3	2	2	4	4	1	4	4	2	2	2	1	3	2	1	2	2	1
2	9	3	5	7	9	7	9	3	9	5	5	7	9	5	9	9	9	5	9	5	9	7	4	2	4	4	4	4	4	4	4	4	1	1	4	4	3	2	4	1
2	3	4	5	5	9	5	9	1	1	5	5	5	2	5	9	5	1	4	4	5	5	5	1	4	3	3	3	3	1	3	3	3	4	4	2	2	3	4	3	8
2	8	8	5	6	9	5	6	5	8	9	5	5	7	5	7	7	5	5	9	5	5	5	2	3	4	2	3	4	1	1	1	1	4	2	1	2	3	4	3	4
2	5	5	5	5	7	5	6	5	5	5	5	5	5	5	6	5	5	5	5	5	5	5	1	3	3	1	1	1	1	1	1	1	3	4	1	1	4	3	1	4
2	2	2	5	4	4	7	5	5	2	5	7	7	3	7	3	2	2	7	4	5	5	5	2	1	1	1	1	1	2	1	1	1	1	1	1	2	2	2	1	1
2	7	6	5	5	8	7	6	5	8	5	5	5	7	5	7	5	5	6	3	7	3	7	2	2	4	3	3	4	2	1	1	4	3	2	1	1	3	2	2	4
2	5	5	5	4	4	5	4	3	4	1	5	5	5	4	5	5	5	5	5	3	5	5	2	2	2	2	1	1	1	1	1	1	2	2	1	2	2	2	1	2
2	5	5	5	5	5	6	5	5	5	5	7	6	5	7	5	5	5	7	5	7	5	7	4	3	2	1	4	2	3	3	2	2	3	2	2	2	3	3	2	1
2	2	4	5	6	7	5	6	5	5	5	6	5	7	6	7	5	3	6	5	3	5	5	1	3	3	2	2	2	1	1	1	3	3	2	1	2	4	2	1	3
2	1	3	5	5	7	5	4	4	3	3	6	6	5	5	3	2	2	5	1	6	5	5	3	1	3	1	3	1	3	1	3	2	1	1	1	2	2	2	1	3
2	7	7	4	2	6	6	2	2	6	1	5	3	7	3	8	3	3	1	6	7	6	7	3	3	3	3	3	1	2	2	1	2	2	1	1	3	3	2	3	3
2	3	5	4	3	2	7	4	3	3	5	5	7	5	5	9	8	7	7	8	5	5	5	3	3	4	4	3	3	3	2	2	4	2	3	2	3	3	2	4	3
2	3	5	7	5	9	7	3	4	3	7	5	7	4	6	1	5	1	5	3	4	3	5	3	1	4	1	2	2	2	4	3	2	2	2	2	2	2	3	2	3
2	3	1	5	1	1	6	1	5	1	5	6	5	5	6	1	1	1	5	5	6	1	7	1	2	1	1	1	1	2	1	1	1	4	4	1	2	4	4	1	7
2	1	3	5	5	1	6	4	3	1	5	5	6	3	5	3	3	5	7	5	5	3	6	2	1	2	1	1	2	1	1	1	2	3	2	1	1	2	2	1	2
2	4	5	4	5	9	5	6	4	1	3	5	5	3	6	3	5	3	7	3	6	5	5	2	1	3	1	2	1	1	2	2	3	2	2	1	2	2	2	4	3
2	3	5	5	5	4	7	5	6	5	5	7	5	5	5	7	4	7	5	3	5	5	5	2	2	3	2	3	2	1	2	3	1	3	2	1	1	3	3	3	5
2	3	7	5	4	5	7	5	4	2	4	7	5	5	7	4	2	2	5	5	4	3	6	4	3	2	3	2	1	1	3	3	3	2	4	3	2	4	3	2	3
2	4	6	6	3	8	9	7	1	3	2	5	6	1	8	5	3	6	8	5	8	4	8	1	1	2	4	2	2	2	3	2	1	3	2	1	2	1	3	4	3
2	1	1	5	1	9	5	1	1	1	1	7	5	5	5	1	1	1	5	1	5	3	5	2	4	4	1	2	2	2	2	1	1	4	1	1	1	1	4	2	4
2	2	3	5	1	1	5	1	6	1	1	5	5	4	5	5	1	1	5	5	3	2	5	3	1	1	3	3	1	3	4	3	1	1	1	2	2	3	1	3	3
2	9	9	5	7	9	5	6	6	6	5	5	5	6	5	9	5	5	5	6	5	5	5	2	3	4	2	2	4	2	2	3	3	4	2	3	2	3	3	2	4
2	4	4	5	4	3	5	5	5	4	4	5	5	4	5	3	3	3	5	5	5	4	5	2	2	3	1	2	2	2	1	2	2	2	2	2	2	2	2	3	3
2	6	7	5	5	8	4	6	5	6	5	5	5	4	5	5	5	6	5	5	3	5	5	3	3	4	2	3	3	2	2	4	2	2	1	1	2	4	3	3	5
2	3	5	5	2	7	5	7	5	5	5	6	6	6	5	4	3	3	6	5	4	8	6	3	2	4	2	2	3	3	4	4	1	3	2	3	2	2	1	2	1
2	1	5	7	4	3	6	4	5	1	5	5	5	5	6	4	3	5	4	1	5	5	6	2	1	1	1	1	1	2	1	1	1	1	1	2	3	2	1	2	2
2	6	5	5	6	7	5	6	5	6	5	5	5	7	5	7	5	5	5	7	5	5	5	3	1	2	3	3	2	3	2	1	2	1	1	1	2	1	4	3	1
2	6	5	5	6	7	5	6	5	6	5	5	5	7	5	7	5	5	5	7	5	5	5	3	1	2	3	3	2	3	2	1	2	1	1	1	2	1	4	3	1
2	4	5	5	5	6	6	5	4	5	5	5	5	5	5	3	5	5	5	5	4	5	5	2	1	2	1	1	1	1	1	1	1	1	1	1	2	3	3	2	4
2	8	8	5	3	7	5	5	3	3	5	5	5	7	5	4	3	3	5	4	5	5	5	2	1	3	2	2	3	2	2	2	3	3	3	2	2	3	3	2	6
2	4	5	4	3	1	6	3	4	5	4	7	5	5	5	2	1	3	8	5	2	5	5	2	1	1	3	3	2	3	4	3	1	3	4	3	2	4	3	2	6
2	7	7	5	9	9	5	3	5	4	1	5	5	5	6	1	9	6	5	5	8	1	5	4	1	3	3	3	2	2	1	1	1	3	1	1	1	1	2	3	1
2	5	7	7	8	5	4	6	1	5	5	7	5	6	2	1	5	5	5	5	1	5	5	1	1	1	1	1	1	2	2	1	1	1	1	3	2	4	1	1	4
2	9	8	5	5	9	5	1	9	7	5	6	5	9	5	4	5	4	5	3	3	4	5	2	4	4	4	4	3	3	3	3	4	4	4	2	2	3	3	3	5
2	3	6	3	6	2	6	7	5	5	1	8	5	7	2	1	6	2	3	7	2	6	6	3	3	1	2	2	2	4	4	2	4	1	1	2	2	1	3	2	3
2	5	7	5	1	5	7	2	1	5	1	8	5	2	9	1	3	2	5	5	1	7	7	2	3	1	1	4	2	3	1	1	1	4	1	1	2	4	3	2	5
2	7	3	5	4	9	7	9	1	2	1	5	5	4	6	7	7	3	5	7	3	6	6	3	2	4	4	3	3	4	3	2	2	3	1	3	3	2	3	3	4
2	9	7	4	5	8	9	7	5	9	1	6	5	2	6	1	1	5	5	1	7	1	7	2	2	3	4	1	4	1	3	1	2	3	4	3	3	4	2	3	5
2	3	5	5	3	7	7	6	3	3	3	5	4	7	5	3	1	1	4	4	6	5	5	4	2	4	4	2	2	4	4	4	4	2	1	3	4	4	2	4	3
2	5	5	5	5	7	5	6	5	5	5	5	5	5	5	6	5	5	5	5	5	5	5	1	3	3	1	1	1	1	1	1	1	3	4	1	1	4	3	1	4
2	4	5	5	7	3	6	7	4	3	4	5	6	6	5	3	7	3	5	1	6	3	5	3	3	3	2	4	2	2	2	2	3	4	4	3	3	3	4	2	3
2	3	8	5	7	4	5	7	3	4	5	5	5	5	5	3	4	2	2	3	5	7	5	2	1	2	1	3	2	2	2	4	2	1	1	3	3	1	3	2	4
2	2	4	6	5	2	7	3	5	1	3	5	6	2	5	3	2	1	5	5	6	3	6	2	3	3	2	2	1	2	3	4	2	4	1	2	2	2	3	3	2
2	9	6	5	3	1	7	9	9	9	2	5	5	8	5	2	5	5	5	7	3	8	8	4	1	2	4	3	4	3	4	4	4	1	1	4	4	2	3	3	1
2	1	5	5	5	1	7	2	5	1	2	8	7	5	5	1	1	1	4	4	7	5	8	2	2	1	1	2	1	3	2	2	1	2	2	2	1	2	3	1	1
2	5	6	5	4	7	6	8	3	4	5	5	5	6	5	4	4	5	5	5	6	5	7	1	3	2	2	1	2	2	2	3	2	3	3	3	2	2	3	2	5
2	3	4	5	5	5	5	5	3	4	5	5	5	4	5	5	5	5	5	5	5	5	5	1	1	2	1	1	1	1	1	1	1	1	1	1	2	1	2	2	2
2	1	7	9	5	9	7	4	2	1	5	5	8	4	9	8	3	1	4	1	7	2	8	3	2	4	4	3	1	3	4	2	2	4	4	2	1	2	3	3	8
2	3	7	5	3	4	5	6	4	2	4	5	5	5	5	4	1	1	5	2	4	3	5	1	2	3	2	1	2	1	2	1	2	2	2	1	2	3	1	1	4
2	5	6	5	7	8	5	8	5	7	5	5	5	4	6	8	8	5	5	5	5	5	5	2	1	3	3	2	3	2	2	2	2	1	1	2	2	1	2	4	6
2	3	4	6	6	3	5	3	6	3	5	5	5	4	5	4	4	4	5	5	4	5	5	4	1	2	4	4	2	4	1	2	2	1	1	4	1	1	1	2	1
2	3	3	5	3	3	6	3	2	6	2	6	6	5	5	2	1	2	6	3	5	1	6	2	1	1	1	3	1	3	2	3	1	2	2	2	1	1	3	1	3
2	3	5	5	6	1	5	4	6	3	5	5	5	3	5	5	5	5	5	3	5	4	5	2	2	1	3	3	2	3	2	2	1	3	3	1	2	3	2	3	4
2	9	9	2	7	9	1	9	7	9	5	1	1	3	1	8	9	8	1	8	1	7	1	2	4	3	2	2	4	2	2	1	2	4	4	1	2	4	4	3	6
2	4	6	5	6	7	5	4	4	3	3	5	5	3	5	6	4	2	5	6	5	6	6	2	2	3	2	2	2	2	2	2	2	2	1	1	2	4	4	2	6
2	3	3	9	5	5	9	5	3	3	5	7	5	5	5	5	5	5	5	5	6	6	7	1	3	3	2	3	3	1	2	2	3	2	2	2	2	1	2	2	3
2	2	6	5	6	6	5	6	5	2	5	5	5	5	5	7	5	3	5	2	4	5	5	2	1	1	1	2	2	2	2	1	1	1	1	1	2	1	3	1	1
2	6	5	5	4	7	6	8	6	6	5	5	6	7	5	7	5	5	4	5	5	5	6	2	2	4	3	3	1	2	3	3	4	2	1	2	3	4	3	1	3
2	1	1	5	1	6	6	3	5	1	5	6	6	5	6	1	1	1	6	3	6	2	6	2	1	2	1	2	1	1	1	1	1	1	1	1	2	1	2	1	1
2	3	3	5	8	9	6	3	3	2	5	5	5	3	5	4	2	2	4	2	7	3	7	4	3	4	2	3	2	3	4	1	4	3	3	1	2	3	2	3	8
2	6	6	7	6	8	5	6	6	6	5	5	5	8	6	7	5	5	5	5	5	5	7	2	1	2	2	2	2	2	2	2	2	3	2	2	2	2	3	3	5
2	1	1	2	1	2	2	1	2	1	1	2	2	3	2	2	1	1	3	2	1	1	2	3	3	1	1	1	1	3	3	1	1	3	1	1	2	1	4	2	4
2	5	3	5	3	8	6	4	4	4	4	6	6	5	6	3	2	4	6	3	6	4	6	3	1	4	2	2	1	2	2	1	1	1	1	2	2	1	3	2	4
2	1	1	5	5	1	5	5	5	5	5	5	5	5	5	5	5	1	5	5	5	5	5	1	2	1	1	1	1	1	1	1	1	2	4	1	1	2	3	1	6
2	3	5	5	5	6	7	4	8	1	6	5	6	1	5	4	3	4	4	3	5	4	5	3	3	3	3	2	2	3	4	2	1	3	4	3	2	2	4	2	5
2	8	5	4	3	9	7	6	2	7	2	4	5	8	5	8	5	5	5	5	1	3	5	3	2	4	3	2	3	3	2	3	4	3	2	2	3	2	2	3	5
2	3	5	5	6	7	5	5	3	4	3	5	5	4	5	6	5	3	6	5	5	3	5	3	2	3	1	2	2	1	2	2	2	2	3	3	2	2	2	2	4
2	4	5	7	5	6	7	6	6	4	3	6	5	6	6	3	5	4	5	4	5	3	5	3	2	2	1	1	2	1	1	1	1	3	2	1	3	1	3	2	2
2	3	4	8	8	9	7	8	9	3	2	5	5	6	9	1	4	1	5	1	1	6	5	3	2	4	2	2	1	3	1	1	2	2	3	3	3	4	1	2	3
2	7	9	5	5	9	5	9	5	9	5	5	5	5	7	8	1	3	3	3	5	4	7	3	2	3	3	2	2	2	2	2	3	2	1	1	2	2	3	2	4
2	6	4	5	5	2	5	4	6	3	5	5	5	6	5	4	3	3	5	5	3	4	5	3	1	2	3	3	2	3	3	4	2	1	1	2	3	2	1	3	1
2	3	7	6	9	9	7	9	7	7	5	7	5	1	5	4	8	3	5	9	4	4	6	2	1	4	4	3	2	2	3	4	3	2	2	3	3	2	2	4	2
2	3	5	5	5	5	5	5	4	5	5	5	5	5	5	5	5	1	5	5	4	5	5	4	1	4	1	3	1	2	3	2	2	1	1	3	3	3	2	2	3
2	2	5	5	6	7	6	5	3	3	6	5	5	6	4	6	7	7	6	4	5	4	6	3	4	4	3	3	2	3	2	2	3	4	4	3	3	2	4	3	5
2	4	4	6	6	7	5	6	7	5	3	8	5	5	6	6	7	4	4	6	9	5	6	3	3	2	3	3	2	2	3	2	3	4	1	2	2	2	3	2	3
2	1	4	3	1	1	6	3	1	1	5	3	4	5	5	5	9	5	1	4	3	1	4	2	1	2	1	3	2	1	4	2	2	1	1	4	3	1	4	2	6
2	3	7	5	5	8	6	4	1	3	5	5	5	2	5	5	3	5	5	2	7	4	5	1	1	3	1	2	2	1	3	3	1	1	1	2	3	2	2	2	2
2	8	8	5	8	6	5	8	7	7	3	5	5	3	5	7	9	6	2	8	4	5	5	2	2	3	2	2	4	2	1	2	3	3	1	1	2	2	3	3	2
2	1	5	7	3	1	9	3	5	3	1	5	7	3	6	2	1	1	5	1	5	3	7	3	2	1	3	3	1	4	2	4	2	1	1	2	2	1	1	2	1
2	7	2	5	2	7	5	2	2	2	2	5	6	5	7	2	2	3	4	6	5	3	5	3	1	2	2	3	1	4	2	2	3	1	1	2	2	1	1	3	1
2	3	4	5	6	7	7	6	4	4	4	5	5	5	6	6	3	3	5	3	6	4	6	3	1	4	3	3	2	3	2	2	3	1	1	3	2	2	2	3	3
2	7	7	5	5	4	7	7	5	7	5	5	5	1	5	5	5	3	5	5	5	5	6	3	1	2	2	2	3	3	2	1	2	1	1	1	1	1	1	1	4
2	2	3	5	6	9	6	6	4	2	5	5	5	6	5	8	3	3	5	3	5	5	5	2	3	3	2	1	2	1	1	2	2	2	2	1	2	1	2	2	3
2	3	3	5	3	6	5	5	5	4	4	6	6	5	6	5	4	3	5	5	5	4	5	3	2	2	1	1	1	3	1	1	1	3	1	1	2	4	3	2	3
2	3	3	5	3	8	5	6	3	2	5	5	5	7	5	3	2	2	5	5	4	7	6	3	1	4	3	3	2	3	2	2	1	1	1	2	2	2	2	2	3
2	7	5	5	5	2	6	6	5	3	5	5	5	5	5	2	2	2	5	5	2	5	6	3	1	1	1	1	2	1	2	1	1	3	2	1	2	3	3	2	5
2	9	3	5	5	9	7	6	4	2	2	6	6	8	6	7	5	5	5	3	6	3	5	2	1	3	3	2	3	3	1	2	4	1	1	3	2	2	1	3	2
2	9	8	6	9	9	6	9	5	9	7	5	5	5	6	9	9	9	1	4	5	6	5	3	1	4	4	2	4	4	4	4	1	1	4	4	4	4	2	4	3
2	3	4	6	5	6	6	6	1	2	1	6	6	5	6	4	5	8	6	1	6	4	9	3	3	2	1	3	1	3	1	1	1	4	2	1	2	1	4	1	4
2	8	7	5	5	9	5	7	6	7	4	5	5	6	5	7	7	7	5	6	5	6	6	3	4	4	1	2	4	3	1	2	3	4	3	2	2	3	2	2	4
2	5	5	5	2	1	8	5	4	6	1	7	5	5	8	2	1	2	5	5	6	4	8	3	1	2	1	2	2	3	2	1	2	2	2	1	1	1	3	2	3
2	3	5	5	7	1	5	7	5	3	1	9	5	3	6	1	1	3	5	5	5	5	5	3	2	1	2	3	2	3	2	2	1	2	3	1	2	3	3	2	4
2	6	3	5	3	1	5	3	5	6	5	5	5	4	5	2	2	2	6	5	6	5	5	2	4	1	1	3	3	3	1	1	1	4	4	1	2	4	4	1	6
2	3	1	5	4	1	5	4	1	4	5	5	5	5	6	1	1	1	5	5	5	3	5	2	1	2	1	1	2	1	1	2	1	1	1	1	2	4	3	1	4
2	5	5	5	5	5	5	5	5	5	5	5	5	5	5	4	3	4	5	5	4	4	5	2	1	2	1	2	2	2	3	2	1	1	1	2	3	1	1	1	1
2	1	5	5	5	1	7	5	3	1	1	5	5	5	5	1	5	1	7	1	6	5	5	3	1	1	1	2	1	4	4	4	1	4	1	3	3	2	1	1	4
2	9	7	6	5	8	7	8	3	9	5	5	5	7	6	5	6	3	2	7	1	5	7	3	1	2	3	3	4	3	3	3	4	1	1	2	3	3	2	3	3
2	6	4	6	4	9	5	6	4	4	5	6	5	5	5	7	4	3	7	5	5	4	5	3	3	4	2	2	3	3	3	3	3	3	3	2	2	1	4	3	6
2	2	2	5	4	2	5	2	3	1	4	5	5	5	5	2	1	1	5	1	5	3	5	3	1	1	1	2	1	3	2	1	1	1	1	1	2	2	2	1	2
2	9	9	5	3	9	6	5	5	9	3	5	5	5	5	1	1	1	5	9	5	1	5	4	1	3	1	1	4	3	1	1	2	1	1	3	3	4	1	1	1
2	7	2	5	2	8	5	4	5	9	5	5	5	5	5	7	2	1	5	5	5	5	5	1	1	3	4	3	3	1	3	2	1	1	1	1	2	1	2	3	2
2	3	3	5	3	3	5	3	3	3	3	5	5	4	5	5	5	5	5	5	5	4	5	1	1	1	1	1	1	1	1	1	1	2	4	1	3	4	3	1	7
2	7	6	5	5	5	7	5	8	7	5	5	5	5	5	4	5	7	6	8	5	5	7	3	3	3	2	2	3	3	1	2	2	3	3	2	2	4	2	3	3
2	1	4	5	6	6	5	7	4	1	5	5	7	3	5	7	4	5	5	1	4	5	5	4	3	3	1	1	1	2	1	1	2	1	2	1	2	2	3	3	3
2	4	5	6	1	9	8	4	5	5	5	7	6	6	5	4	1	1	6	3	5	4	6	4	2	4	4	3	1	3	4	2	2	2	1	3	2	3	3	4	1
2	7	7	1	5	9	1	7	8	8	1	5	1	1	1	5	1	1	1	1	1	7	6	3	1	4	3	4	4	2	1	1	4	2	1	1	1	4	3	3	4
2	1	3	5	3	2	5	1	7	1	5	7	5	3	5	1	2	1	8	3	5	2	5	3	1	2	2	1	1	3	3	1	2	2	1	2	2	3	4	2	2
2	4	4	5	5	1	6	4	5	5	4	5	6	5	5	3	5	5	5	4	5	5	5	2	1	1	1	2	1	2	1	1	2	1	1	1	2	1	3	1	1
2	3	4	6	6	3	6	7	5	2	7	6	7	5	6	5	7	2	7	2	3	5	5	3	2	2	1	3	1	2	3	1	2	1	1	1	2	2	2	2	3
2	7	9	5	6	9	5	9	7	8	5	5	5	7	5	8	6	3	4	2	3	5	5	3	1	4	4	2	3	2	2	1	4	2	2	1	1	2	2	4	2
2	1	3	5	4	9	8	9	5	3	7	5	5	8	5	8	3	5	7	1	4	3	5	3	3	4	1	3	2	4	3	1	2	3	1	2	1	1	4	3	5
2	1	1	6	1	1	7	1	2	1	1	8	5	2	5	1	1	1	1	1	7	1	5	3	1	2	2	2	1	3	4	3	2	3	2	3	2	2	1	1	5
2	9	9	3	1	9	5	9	2	9	1	4	6	6	4	1	1	1	5	9	4	2	4	2	1	4	1	2	4	3	2	1	2	1	1	4	4	1	4	2	1
2	7	7	3	4	8	5	7	3	3	6	5	3	5	4	7	3	4	4	5	3	5	6	2	2	3	1	2	3	2	1	1	1	3	4	1	2	4	3	2	6
2	3	3	5	3	8	5	3	2	2	2	5	7	2	6	7	3	2	7	1	6	3	6	4	3	4	4	2	2	4	4	2	2	4	1	4	3	3	2	3	4
2	4	5	5	4	6	6	5	5	5	5	5	6	4	6	4	4	3	5	5	6	5	5	2	1	2	2	2	1	2	2	1	1	3	2	1	1	2	3	1	3
2	3	4	5	4	9	5	9	4	1	2	7	6	3	4	9	2	1	5	1	5	4	6	4	2	4	4	3	1	4	2	3	1	1	1	1	2	2	2	4	2
2	2	3	7	4	1	5	6	7	4	1	8	6	5	6	3	3	1	6	1	7	3	7	2	2	2	2	3	2	2	1	1	2	3	4	1	1	4	4	2	6
2	3	5	5	5	4	5	5	3	3	5	5	5	5	5	5	3	3	5	3	5	5	5	1	1	1	1	1	1	1	1	1	1	2	3	1	3	1	1	1	4
2	5	5	4	5	4	7	5	6	5	5	8	5	4	5	5	5	8	5	5	4	3	5	2	3	2	1	4	2	2	2	2	2	4	3	3	2	3	3	2	3
2	5	5	5	6	5	5	5	7	5	5	5	5	6	5	5	5	5	6	5	7	5	5	3	1	2	3	2	1	2	2	2	2	1	2	3	3	3	2	2	5
2	7	5	5	7	8	5	7	5	3	1	5	5	6	5	3	3	3	2	2	1	6	5	4	3	3	2	3	2	3	1	4	1	3	1	3	3	1	4	3	3
2	7	6	4	4	7	4	5	3	5	3	5	5	7	5	5	3	3	5	6	5	3	5	3	1	4	3	2	3	4	4	2	4	3	1	2	2	3	2	2	4
2	9	5	5	5	7	5	7	5	7	5	3	5	5	5	3	7	7	2	5	2	5	5	3	3	2	2	2	3	3	2	2	2	3	2	2	2	3	2	2	4
2	2	3	5	5	8	5	3	5	3	5	5	5	1	5	3	3	3	6	4	5	4	6	3	1	3	1	2	1	2	2	1	1	2	1	2	2	2	3	2	3
2	4	6	5	6	7	5	4	4	2	4	6	5	5	5	3	3	1	5	1	5	4	6	2	2	1	1	1	1	1	2	3	2	1	1	2	3	4	3	1	4
2	7	6	5	5	9	5	7	5	3	5	5	5	6	5	7	7	8	7	3	7	7	5	3	3	4	2	4	3	2	1	2	3	3	2	2	2	2	3	4	6
2	7	6	3	5	9	5	6	1	2	5	5	5	7	6	7	6	3	7	6	5	4	5	2	1	4	4	4	3	3	3	4	3	2	2	4	3	3	2	4	2
2	5	5	5	5	5	5	5	3	5	5	6	5	6	5	4	4	3	5	5	5	5	5	3	3	2	2	2	1	2	2	2	2	4	4	2	2	2	4	1	6
2	6	6	5	5	9	7	9	1	1	1	5	6	9	5	9	9	6	8	5	1	5	5	4	3	4	4	4	3	4	3	4	4	3	2	3	4	4	4	4	3
2	7	6	5	5	8	6	7	6	7	5	5	5	6	5	5	5	5	7	8	5	6	5	3	1	3	2	2	4	3	3	3	3	3	2	2	2	4	3	2	5
2	7	7	5	5	9	5	6	3	7	5	5	5	5	5	8	8	2	8	4	5	1	5	4	3	4	4	2	3	4	3	3	1	3	1	3	3	2	3	2	2
2	7	4	2	3	7	1	6	2	5	5	5	5	1	4	8	4	3	3	6	3	5	5	2	2	4	1	2	2	2	2	1	1	3	1	1	2	1	3	3	2
2	4	5	5	5	6	6	3	5	1	5	6	3	5	3	3	3	5	3	5	3	5	3	2	1	2	2	3	2	2	2	3	2	2	3	3	2	3	1	2	6
2	9	9	5	9	9	6	9	8	9	7	4	5	9	6	9	9	9	5	5	5	9	6	3	3	4	4	4	4	4	4	3	3	3	2	3	4	2	2	3	4
2	8	5	7	3	7	5	7	5	8	3	5	5	8	5	3	5	4	5	5	4	5	5	3	3	3	2	2	3	3	2	2	3	3	3	1	2	3	3	2	5
2	6	6	5	6	8	5	7	4	4	3	5	5	5	7	3	2	2	5	4	5	4	6	3	2	3	3	4	2	2	4	4	2	2	1	3	4	1	4	3	3
2	3	7	5	7	8	5	8	6	6	5	5	5	3	5	7	3	2	5	6	5	3	6	3	4	4	1	3	2	3	3	3	1	3	2	2	2	3	3	2	5
2	5	5	5	4	5	5	5	5	5	5	5	5	4	5	5	3	3	5	5	5	5	5	4	1	3	4	3	2	3	4	4	1	1	1	4	4	1	2	3	4
2	6	2	5	2	6	7	3	1	2	5	6	8	5	5	6	4	5	4	5	2	2	6	2	2	2	2	3	2	2	2	4	2	2	1	2	2	2	3	2	3
2	7	6	5	5	7	6	8	6	5	5	5	5	6	5	5	6	5	7	6	5	5	6	3	3	4	2	4	3	3	2	2	4	2	1	2	1	2	3	2	5
2	4	3	5	5	6	5	3	4	3	5	6	6	4	7	4	3	2	4	5	5	3	6	2	1	2	1	1	1	2	2	1	2	1	1	1	2	4	2	1	3
2	7	5	5	7	5	5	7	5	7	5	5	5	5	5	5	5	5	5	7	5	7	5	2	2	2	1	2	4	2	2	1	2	2	3	2	1	4	2	1	1
2	7	7	4	5	7	3	8	1	2	3	4	5	8	8	3	2	5	2	3	5	7	5	1	1	1	2	2	1	1	3	3	3	1	1	1	1	1	1	1	8
2	8	8	1	5	9	6	5	4	8	2	5	6	6	5	1	5	4	4	5	5	5	5	3	2	3	3	3	3	3	3	4	2	2	2	3	2	2	3	3	2
2	3	5	5	5	8	5	7	5	3	5	5	5	6	6	6	3	3	5	1	5	5	7	2	1	3	2	3	2	3	1	2	3	2	1	1	1	3	2	2	4
2	4	3	6	6	6	5	4	3	2	5	5	5	4	5	6	6	4	6	4	5	4	6	3	3	3	1	3	1	2	2	1	1	1	1	1	1	2	4	2	1
2	2	5	5	5	8	6	4	3	1	5	5	5	3	6	7	4	1	5	2	5	6	5	3	1	4	2	3	1	3	4	2	1	2	3	3	3	3	2	3	4
2	7	6	4	7	7	6	7	6	6	5	6	4	8	6	4	7	7	7	7	4	6	5	3	2	3	1	3	3	3	4	3	3	3	1	3	3	1	2	2	2
2	7	7	5	7	9	5	6	3	6	1	5	5	5	6	7	2	1	5	5	5	3	5	3	2	4	2	2	3	3	2	4	2	3	3	3	4	2	2	3	4
2	7	5	5	5	8	7	5	3	4	5	5	5	4	5	3	5	5	5	4	5	6	6	1	3	3	1	2	3	3	1	1	2	2	2	1	2	3	2	2	4
2	3	3	5	6	3	6	5	5	2	5	5	5	7	5	6	5	5	5	5	4	5	5	2	3	3	2	2	3	3	2	2	4	4	3	1	2	3	4	2	6
2	7	3	5	5	7	7	3	5	5	3	5	7	7	5	5	5	5	7	3	5	5	7	3	2	3	3	3	3	2	2	1	2	2	3	2	2	2	2	2	5
2	9	9	3	6	9	3	9	9	9	2	3	3	6	3	7	5	5	6	5	5	5	5	4	2	4	4	1	4	4	2	2	2	3	2	2	3	3	3	3	5
2	9	6	3	5	8	5	9	7	9	3	6	4	8	5	5	6	5	6	6	6	5	5	4	3	4	4	3	4	4	3	2	4	2	1	3	2	2	3	4	4
2	1	1	5	1	1	9	5	5	5	5	9	5	3	7	9	9	9	3	8	4	8	5	3	3	4	3	3	4	3	2	3	3	3	2	1	2	4	3	2	4
2	9	8	1	9	9	4	9	9	9	9	3	5	9	3	9	9	5	9	9	5	5	5	3	1	4	3	3	4	3	3	3	4	1	1	3	1	1	2	3	1
2	4	3	3	3	6	6	7	3	3	3	5	5	3	5	5	3	2	5	5	5	5	6	3	2	2	2	2	2	4	2	3	2	3	4	2	1	3	2	3	4
2	1	5	7	5	7	7	5	2	3	5	5	7	3	5	3	3	1	2	2	6	3	6	2	4	3	1	1	2	1	1	1	1	4	4	1	1	4	4	1	6
2	9	8	1	9	9	4	9	9	9	9	3	5	9	3	9	9	5	9	9	5	5	5	3	1	4	3	3	4	3	3	3	4	1	1	3	1	1	2	3	1
2	3	2	5	2	5	5	2	2	2	1	5	5	5	5	1	1	1	5	5	5	5	5	1	1	1	2	4	1	1	2	1	1	1	1	1	2	3	3	1	2
2	5	5	5	5	5	5	5	5	5	5	5	5	5	5	5	3	1	5	5	5	5	5	1	1	1	1	1	1	1	1	1	1	1	1	1	1	1	1	1	1
2	5	5	5	5	6	5	5	3	5	5	5	5	3	5	3	2	1	5	1	3	5	2	3	2	1	1	3	1	2	3	1	1	3	1	2	2	3	4	1	4
2	5	5	5	5	6	5	5	3	5	5	5	5	3	5	3	2	1	5	1	3	5	2	3	2	1	1	3	1	2	3	1	1	3	1	2	2	3	4	1	4
2	9	9	5	9	9	5	9	5	9	5	7	5	9	7	9	9	9	5	9	5	9	5	4	3	4	4	3	4	4	4	3	4	3	3	3	3	2	3	3	8
2	3	2	5	2	5	5	2	2	2	1	5	5	5	5	1	1	1	5	5	5	5	5	1	1	1	2	4	1	1	2	1	1	1	1	1	2	3	3	1	2
2	7	3	5	3	9	5	4	3	7	5	5	4	8	5	3	3	3	5	1	5	4	5	2	2	4	2	1	3	2	2	2	2	2	2	1	2	2	2	2	4
2	5	3	4	3	8	2	4	1	8	1	5	5	5	5	9	9	1	1	1	1	9	1	3	2	2	2	4	1	4	3	3	3	4	4	2	2	4	3	2	4
2	3	5	5	5	3	7	5	4	3	5	6	7	5	8	3	1	5	9	2	6	5	7	3	1	2	4	3	2	3	4	4	1	2	2	2	2	2	2	3	1
2	5	5	5	5	5	5	5	5	3	5	3	5	5	5	5	5	3	5	4	5	5	5	1	2	1	1	1	1	1	1	2	1	1	1	1	2	1	4	1	2
2	9	6	5	8	9	5	9	2	7	2	6	4	9	4	2	2	1	6	9	2	8	6	3	2	4	3	3	4	3	3	3	4	2	2	2	3	3	3	2	4
2	2	5	6	7	5	7	2	5	5	2	6	5	4	6	2	5	5	7	5	5	5	6	2	1	2	3	2	3	1	2	1	1	2	1	1	1	1	3	2	4
2	1	3	6	2	1	8	2	5	1	1	5	5	3	6	4	3	1	9	2	5	4	6	2	3	2	1	2	1	2	2	1	1	3	1	1	2	3	4	2	4
2	6	6	6	6	7	6	7	6	7	6	6	6	7	6	7	4	4	5	5	4	5	6	3	1	3	3	3	3	3	2	4	3	1	1	3	3	2	2	3	1
2	5	3	3	5	6	5	6	1	1	1	5	5	7	5	7	1	1	5	7	5	5	5	1	2	2	2	1	1	2	3	1	3	3	2	1	1	1	4	1	4
2	7	7	5	7	7	7	7	3	3	3	5	5	7	7	3	2	2	5	6	7	5	7	4	1	4	4	4	4	3	4	3	3	1	1	3	4	1	1	3	1
2	3	4	5	3	7	5	3	3	1	3	5	6	7	5	4	3	2	4	5	7	4	5	2	3	2	1	2	3	1	1	1	2	3	1	2	2	2	4	2	4
2	5	5	6	5	3	6	5	5	5	4	7	5	5	6	4	5	5	6	5	6	5	5	2	2	2	2	1	1	2	3	3	2	1	1	3	4	3	4	1	6
2	4	4	4	4	8	4	8	8	6	2	6	4	8	4	2	2	1	1	2	6	1	5	4	1	4	3	4	4	4	4	2	3	2	1	2	2	3	1	2	3
2	1	1	5	1	5	5	1	5	4	5	5	7	1	5	5	1	1	5	5	5	5	5	2	2	2	2	1	1	3	1	2	1	1	2	1	1	1	2	2	4
2	6	4	5	4	6	5	3	4	6	5	5	5	4	5	4	4	5	5	7	5	6	5	3	1	3	3	2	3	3	3	3	2	1	1	3	2	4	2	3	1
2	2	5	6	7	5	7	2	5	5	2	6	5	4	6	2	5	5	7	5	5	5	6	2	1	2	3	2	3	1	2	1	1	2	1	1	1	1	3	2	4
2	5	5	7	5	7	8	6	6	7	5	5	6	5	7	2	2	2	5	3	7	5	8	2	3	3	2	3	2	2	2	2	1	3	2	1	2	3	3	1	4
2	2	5	6	2	7	6	3	6	2	6	4	6	3	8	2	5	3	6	3	2	2	5	3	1	2	2	2	2	3	3	4	2	1	1	2	3	1	2	3	4
2	5	3	4	3	8	2	4	1	8	1	5	5	5	5	9	9	1	1	1	1	9	1	3	2	2	2	4	1	4	3	3	3	4	4	2	2	4	3	2	4
2	1	1	5	7	9	6	9	4	9	1	5	5	9	7	9	9	1	4	1	5	1	6	3	2	4	3	2	4	4	3	3	3	2	1	1	1	2	2	3	3
2	9	9	5	6	9	1	7	8	9	8	1	3	9	1	6	2	1	3	1	5	3	5	4	1	3	3	3	3	4	3	4	3	1	1	2	1	3	2	3	1
2	3	3	5	3	3	5	5	5	3	2	5	5	5	5	3	4	3	5	3	5	5	5	2	1	3	1	3	2	3	1	1	2	1	1	3	3	2	2	1	1
2	1	1	4	1	2	4	1	1	1	1	5	5	1	5	1	1	1	5	5	6	1	6	1	1	3	1	3	1	1	1	1	1	1	1	1	1	2	3	1	1
2	2	5	6	7	5	7	2	5	5	2	6	5	4	6	2	5	5	7	5	5	5	6	2	1	2	3	2	3	1	2	1	1	2	1	1	1	1	3	2	4
2	5	5	6	6	7	7	4	4	5	3	7	6	5	6	5	4	3	6	5	7	2	7	2	3	2	1	4	2	3	1	1	1	4	2	1	2	2	3	1	5
2	5	5	5	2	9	7	4	3	3	5	6	5	5	5	4	5	1	3	1	5	5	5	1	2	3	1	2	3	2	2	3	2	4	3	1	2	2	3	3	6
2	5	5	5	5	2	5	5	5	3	3	5	5	5	5	3	3	2	5	5	5	5	5	3	3	3	1	1	1	1	1	1	1	3	2	1	2	3	4	2	2
2	6	3	7	3	9	8	7	4	1	1	5	5	5	4	2	1	1	6	4	6	2	6	3	2	3	4	3	3	3	3	3	2	3	3	2	2	1	2	3	3
2	3	4	5	5	9	7	9	9	5	1	5	5	8	6	3	3	1	6	8	5	6	5	2	1	4	4	3	4	3	4	4	4	2	3	4	4	3	3	3	6
2	5	6	5	4	8	5	3	7	6	6	5	5	7	5	4	3	3	6	4	6	4	6	3	2	3	2	1	2	3	2	2	2	3	3	2	2	2	2	3	4
2	1	2	7	1	8	9	6	9	1	1	9	9	5	9	3	1	1	7	1	9	2	9	3	2	3	2	3	2	3	1	1	2	2	2	1	2	2	3	3	2
2	8	5	5	3	9	9	5	3	6	3	5	5	7	6	3	3	3	7	5	5	5	7	3	1	4	4	3	4	4	2	1	2	2	1	2	1	1	2	3	6
2	6	6	4	3	7	5	3	4	5	3	5	5	6	5	4	1	1	5	2	5	4	6	3	2	4	3	2	3	3	2	2	3	2	2	2	1	3	3	3	4
2	7	7	4	5	6	5	5	6	6	4	5	5	6	5	4	6	7	5	7	5	5	5	3	3	3	1	3	3	2	1	1	3	3	1	1	1	1	3	3	5
2	6	5	5	5	6	5	5	4	4	5	5	5	5	5	5	3	2	5	5	5	5	5	1	1	2	1	2	2	1	4	1	1	1	1	1	1	4	3	1	2
2	1	2	6	1	1	8	5	3	2	4	8	9	5	8	2	1	2	7	2	7	4	7	1	3	1	2	4	1	3	1	1	2	3	3	2	2	3	2	1	4
2	4	4	5	6	3	5	2	3	7	6	6	6	7	5	1	1	2	6	4	5	4	5	2	2	1	2	3	1	2	2	1	1	2	3	1	2	3	3	2	3
2	5	5	7	1	7	5	1	5	1	1	7	3	5	7	3	3	1	7	7	5	5	5	2	1	3	2	2	2	2	1	1	1	1	2	1	2	2	2	2	3
2	5	5	5	5	7	5	6	5	6	5	5	5	6	5	6	5	5	5	7	5	5	5	3	2	4	3	3	2	2	4	2	3	2	1	4	3	2	4	4	1
2	5	5	5	5	5	5	5	5	5	5	5	5	5	5	5	5	5	5	5	5	5	5	2	1	1	1	1	1	2	2	2	1	1	1	1	2	1	1	1	2
2	6	6	5	5	7	6	6	5	5	5	5	5	5	5	7	5	9	7	5	5	5	6	2	3	3	1	4	2	3	2	1	1	4	3	3	3	3	1	1	1
2	9	9	1	9	9	5	8	5	9	1	5	1	9	5	1	5	9	7	9	1	9	9	3	1	4	3	3	3	2	3	4	4	1	3	1	1	2	3	2	2
2	7	1	5	2	1	5	7	2	2	2	5	5	2	5	4	2	2	1	2	4	2	3	2	2	2	1	1	1	2	2	1	1	2	1	2	2	3	2	1	2
2	7	7	5	7	8	6	7	7	7	5	6	5	5	5	8	6	2	4	7	6	3	7	2	1	3	2	3	3	2	1	2	1	2	1	3	3	2	2	2	2
2	8	9	3	9	7	1	9	9	6	5	3	1	9	2	8	3	1	5	3	8	5	5	2	1	3	3	3	2	2	2	2	1	2	3	1	1	3	2	1	2
2	2	3	5	1	5	9	7	8	5	5	8	7	3	5	7	8	3	5	5	2	5	7	3	2	3	3	2	4	3	2	2	3	3	2	1	2	2	3	1	5
2	5	6	5	5	7	5	8	4	6	5	5	5	5	5	6	5	4	6	4	6	5	6	4	1	3	2	3	3	2	1	1	1	2	1	1	1	4	1	2	3
2	4	4	5	3	5	5	5	5	5	5	6	5	4	5	4	3	4	5	5	5	5	6	3	2	1	2	2	2	2	1	1	1	2	1	1	2	2	2	1	4
2	4	3	5	5	7	5	3	7	4	5	5	5	2	5	3	2	2	3	1	2	3	6	2	3	2	2	1	2	2	2	1	2	4	4	1	1	1	4	2	7
2	3	7	6	5	4	7	5	6	4	5	7	5	5	5	4	5	3	3	2	5	5	5	3	3	4	1	4	1	1	1	1	1	4	1	1	3	2	1	1	2
2	4	4	6	5	6	5	4	4	4	3	5	5	6	5	4	3	3	5	3	5	4	5	1	2	2	2	2	1	2	1	1	1	2	2	1	1	4	3	2	3
2	4	5	7	5	5	6	3	5	4	5	5	5	5	5	4	5	5	5	5	5	5	5	1	1	2	1	1	2	2	2	2	1	1	1	1	1	3	3	1	5
2	5	6	5	6	6	5	5	5	5	5	5	5	5	5	6	5	5	3	5	5	5	9	2	2	3	2	2	2	2	2	1	2	3	2	1	1	2	4	2	6
2	7	8	5	8	8	7	8	5	6	5	6	4	6	4	3	2	2	6	4	4	5	7	4	1	2	2	3	2	4	4	4	2	1	1	4	2	1	1	4	3
2	1	7	5	5	1	5	7	5	1	1	7	5	5	5	3	3	1	5	1	5	1	7	2	3	2	1	1	2	2	2	1	1	3	1	1	2	1	3	2	5
2	5	8	6	7	5	4	9	4	6	9	6	7	6	3	7	6	9	5	1	5	9	5	4	1	2	2	1	3	3	1	1	2	1	1	1	1	3	4	2	1
2	7	7	1	7	9	1	9	5	9	5	5	7	1	5	1	1	1	7	9	7	5	7	3	2	4	2	4	4	3	1	1	3	4	3	1	2	1	3	3	3
2	7	6	3	6	6	4	6	5	2	5	5	5	5	4	7	4	5	3	5	4	7	6	1	2	2	1	2	3	2	2	1	1	2	1	3	2	2	3	2	4
2	6	7	6	6	7	7	3	5	6	3	5	6	5	5	4	5	4	5	5	5	5	5	1	3	2	2	1	2	1	1	1	1	3	2	1	2	3	1	2	5
2	8	6	5	5	9	5	7	9	9	6	7	7	9	5	8	7	5	5	9	5	5	5	3	1	4	3	3	3	2	2	1	3	1	1	3	3	1	1	3	2
2	6	7	5	6	7	5	5	5	6	5	6	5	5	6	5	7	4	5	4	6	5	5	3	1	3	3	2	2	3	3	3	2	2	2	2	2	2	2	3	3
2	7	6	5	5	7	5	6	5	7	5	5	5	6	5	7	3	5	5	4	5	5	5	3	1	3	1	1	3	1	2	1	1	2	1	2	2	1	3	2	2
2	2	3	8	3	6	7	3	4	2	3	9	8	4	8	2	1	2	8	5	8	5	9	2	1	2	1	1	1	3	2	2	1	1	1	3	2	1	1	1	2
2	2	2	5	2	4	8	2	2	3	1	7	9	6	7	5	5	5	5	5	5	5	5	1	1	2	2	2	1	1	2	2	1	1	1	2	2	3	2	2	1
2	5	5	5	5	7	5	7	4	2	5	5	5	4	5	4	3	3	5	3	5	3	5	4	2	3	3	3	4	3	2	1	2	3	1	1	3	3	3	3	3
2	7	5	5	5	9	5	9	6	9	5	5	5	4	5	4	2	2	3	1	5	4	5	3	4	3	2	3	3	3	2	3	2	3	3	2	2	3	2	2	6
2	5	6	4	5	3	7	6	3	4	1	5	5	3	7	1	1	3	7	7	7	1	7	2	3	2	2	1	2	2	2	1	1	4	2	1	2	3	4	2	6
2	9	5	5	7	9	7	9	9	9	1	5	3	9	5	7	2	1	6	7	3	9	5	3	1	3	4	3	4	3	3	3	4	3	4	2	2	4	3	4	5
2	6	6	5	5	3	6	5	5	6	5	5	5	3	5	4	5	5	5	5	4	5	5	2	1	2	1	1	1	2	1	2	1	1	1	1	2	3	2	1	3
2	3	3	5	6	4	6	4	5	3	4	5	6	6	6	4	3	2	5	1	6	5	6	2	2	1	2	2	1	2	2	1	2	2	1	2	2	2	3	2	2
2	7	5	5	5	9	7	5	6	7	5	7	5	9	5	4	5	3	6	5	7	5	5	2	1	4	3	2	4	3	1	1	1	4	3	1	2	3	4	3	4
2	2	5	5	5	7	5	3	3	2	3	5	5	5	5	4	5	3	5	5	5	5	5	2	2	3	1	2	1	2	2	1	2	3	1	1	2	2	3	2	4
2	8	6	5	7	9	5	6	4	9	3	6	5	9	5	9	7	3	5	7	5	4	5	2	3	4	1	4	4	2	1	1	4	4	3	1	2	4	2	4	3
2	9	7	4	5	9	4	9	9	9	4	2	6	9	5	5	5	5	6	7	5	3	3	1	3	4	1	1	4	1	1	1	2	3	1	1	1	2	4	1	4
2	8	5	1	3	7	1	6	9	6	1	1	1	9	1	7	7	5	4	5	6	5	6	3	4	4	2	3	3	3	3	3	3	1	1	3	4	2	1	2	3
2	2	2	3	3	4	4	4	4	3	2	2	5	4	5	2	2	2	3	4	4	2	2	2	3	2	1	4	2	2	2	3	2	2	2	2	2	3	3	3	4
2	5	5	5	5	6	5	5	3	1	5	6	5	5	5	5	5	5	5	5	5	5	5	1	1	2	1	2	1	1	1	2	1	2	2	1	1	2	3	2	5
2	1	1	5	6	3	5	7	3	1	3	6	5	4	6	8	4	1	5	2	5	1	6	2	1	2	1	2	1	2	1	1	1	1	1	1	2	3	1	1	1
2	5	5	3	6	7	6	6	4	6	4	4	6	4	4	6	6	6	5	5	6	5	6	3	2	3	2	3	3	3	3	4	2	2	3	2	2	4	3	2	2
2	2	2	5	2	8	5	9	2	6	5	5	5	5	5	9	2	1	5	5	5	5	5	1	3	3	1	1	2	2	1	1	3	3	4	1	2	4	2	1	5
2	2	1	5	2	7	5	2	2	2	2	7	7	5	5	7	1	1	6	1	6	4	8	2	2	3	1	2	1	2	2	1	1	2	1	1	2	2	1	2	5
2	2	1	5	2	7	5	2	2	2	2	7	7	5	5	7	1	1	6	1	6	4	8	2	2	3	1	2	1	2	2	1	1	2	1	1	2	2	1	2	5
2	6	6	3	4	9	6	6	2	1	1	9	3	6	6	1	1	1	9	9	5	1	5	3	4	4	4	3	1	1	4	4	4	3	1	2	2	3	4	2	1
2	4	4	5	4	5	6	5	4	4	4	5	6	5	6	5	5	3	5	5	5	5	6	1	2	1	1	1	1	2	2	1	1	2	3	1	1	1	3	1	3
2	1	5	5	5	1	5	5	4	4	4	7	5	4	5	2	1	1	5	4	4	5	5	2	1	1	1	1	1	1	1	1	1	1	1	1	2	1	1	1	1
2	7	7	5	6	7	5	5	7	7	5	6	5	5	5	5	5	5	7	4	5	5	5	3	2	3	2	4	3	2	2	3	2	3	2	3	2	1	1	3	3
2	1	1	5	5	7	5	1	1	1	1	5	5	5	5	6	5	1	5	1	5	5	5	3	3	3	2	3	1	3	3	2	2	3	2	3	3	1	3	3	4
2	7	8	1	5	9	1	8	9	8	3	5	1	8	2	9	7	3	1	7	2	9	5	4	2	4	4	3	4	2	4	4	2	3	4	3	3	4	3	4	5
2	1	1	5	1	9	6	5	3	1	5	5	7	2	7	2	1	1	9	9	9	5	6	4	3	4	3	1	3	4	3	1	1	3	3	3	2	2	1	4	2
2	9	9	5	9	9	5	9	7	9	7	5	5	6	5	9	9	9	9	9	5	9	5	4	3	4	4	4	4	4	4	4	4	2	1	4	3	2	3	3	2
2	2	4	5	3	6	5	2	5	3	4	5	5	5	6	3	2	1	6	2	4	3	5	1	1	2	2	1	1	1	1	1	1	3	3	1	2	1	2	1	1
2	1	2	5	2	1	5	2	2	1	1	5	5	3	5	1	1	1	5	3	5	1	5	1	1	1	1	2	1	2	1	1	1	1	1	1	1	1	1	1	1
2	3	4	6	7	9	8	5	9	2	5	7	7	8	6	8	7	9	6	8	7	7	8	3	3	3	4	3	2	4	4	4	3	3	2	3	2	3	3	3	3
2	2	5	5	3	1	6	4	1	1	5	6	5	2	5	3	3	3	5	5	6	3	6	2	3	2	2	1	2	1	1	2	1	4	2	1	2	2	4	1	5
2	6	5	5	5	7	6	5	5	5	4	6	5	5	5	3	5	5	5	5	5	5	5	1	2	2	1	2	2	2	1	2	1	2	2	1	2	1	2	1	3
2	9	9	5	9	9	5	9	7	9	7	5	5	6	5	9	9	9	9	9	5	9	5	4	3	4	4	4	4	4	4	4	4	2	1	4	3	2	3	3	2
2	5	8	5	5	4	3	8	3	8	3	5	3	7	3	3	5	3	5	5	3	3	5	2	2	2	1	2	3	3	2	1	3	2	1	1	2	3	3	1	5
2	1	3	5	1	6	5	1	1	1	5	5	5	5	5	2	1	3	5	1	5	1	5	3	4	2	1	1	1	2	2	1	2	3	1	2	1	3	3	2	5
2	9	9	5	5	7	5	4	3	3	3	5	5	7	5	5	3	3	5	5	4	3	5	1	3	4	1	1	4	1	1	2	3	4	1	2	3	3	4	2	4
2	5	3	7	4	5	7	5	4	4	3	5	7	3	5	5	5	5	5	4	4	4	5	3	3	2	1	1	1	1	1	1	1	3	2	2	2	1	3	2	5
2	5	4	6	3	6	6	3	5	3	2	5	5	5	5	3	2	4	6	5	5	3	5	2	4	2	1	3	2	2	1	1	2	3	1	2	2	2	3	1	2
2	5	5	6	4	2	4	5	6	6	3	6	7	4	5	4	2	1	7	3	5	4	5	3	3	1	1	3	1	3	3	1	1	4	2	1	1	2	4	1	5
2	1	5	5	5	7	6	6	5	5	3	5	5	7	5	8	4	4	3	1	5	6	6	2	2	3	1	1	2	1	2	1	2	1	1	1	1	4	3	2	1
2	6	6	5	5	7	5	8	6	4	3	5	5	5	5	7	3	2	4	3	6	5	6	2	2	4	1	2	3	2	2	2	2	3	2	2	2	3	3	1	3
2	6	6	4	5	6	7	5	6	5	5	6	5	5	6	5	5	5	5	5	5	5	5	3	1	2	1	2	2	2	1	3	1	1	1	1	2	1	4	2	3
2	5	5	5	5	9	5	5	5	5	5	9	5	5	5	5	5	1	5	5	5	5	5	1	1	1	1	1	1	4	1	1	1	4	1	1	3	4	3	1	4
2	5	5	7	5	9	7	5	5	5	5	5	5	5	5	6	6	5	5	5	5	5	7	2	3	4	2	1	2	1	1	4	1	3	4	3	1	4	3	2	6
2	4	4	6	4	4	6	4	4	4	4	6	6	6	6	5	5	4	6	5	6	4	6	3	1	1	4	2	2	4	4	3	2	2	2	3	3	3	1	1	5
2	1	3	6	4	3	7	5	6	1	4	6	6	3	6	6	3	1	5	1	5	4	5	2	2	1	1	2	2	2	2	2	2	2	3	1	2	4	2	2	4
2	7	6	5	6	9	5	6	5	7	5	5	5	5	5	2	2	3	3	1	2	5	5	3	2	3	2	3	2	3	2	2	1	3	3	2	2	3	3	3	5
2	7	5	5	5	8	5	5	5	7	5	5	5	6	5	4	5	3	5	5	3	5	5	2	3	3	1	2	4	3	1	1	3	3	1	1	3	2	2	1	4
2	7	5	5	6	9	5	7	1	7	3	6	6	7	5	7	6	5	1	5	3	1	5	3	1	4	3	3	4	3	3	3	3	1	1	4	3	4	2	3	3
2	5	6	5	5	7	5	5	3	5	5	5	5	4	5	5	5	6	5	5	5	5	5	1	3	2	1	2	2	2	2	3	1	3	1	1	2	3	2	2	3
2	7	7	5	5	8	7	8	5	7	5	6	5	5	6	3	3	3	7	3	5	5	6	3	3	4	3	2	3	2	2	2	2	3	3	2	1	3	3	3	5
2	9	5	5	5	9	5	9	5	9	5	5	5	9	5	9	4	6	5	2	2	5	5	3	3	3	3	3	3	3	3	4	3	3	3	3	2	3	2	3	4
2	3	3	6	1	2	7	2	6	2	5	7	7	6	5	1	1	1	6	1	8	5	8	1	2	1	2	2	1	3	3	1	1	3	2	1	3	2	2	3	3
2	2	2	5	5	7	6	6	1	1	5	7	5	1	5	4	4	2	5	4	6	5	6	1	3	2	1	1	2	2	1	1	2	3	3	2	1	3	1	2	6
2	5	5	5	5	5	9	5	8	5	5	9	5	5	5	5	5	5	5	5	5	5	5	2	1	1	1	3	1	3	1	3	1	1	1	3	3	1	1	1	3
2	1	5	5	5	1	7	3	5	3	3	7	7	5	5	5	3	5	6	4	5	5	6	3	3	2	2	3	1	3	2	2	1	4	3	2	3	4	4	3	5
2	7	5	5	5	3	6	5	5	7	5	7	6	7	6	3	2	2	5	6	3	7	5	2	2	2	1	2	3	2	2	3	4	2	1	3	4	1	2	2	2
2	5	5	5	5	6	5	5	8	7	5	3	4	7	5	5	5	5	5	5	5	7	5	1	2	2	1	2	2	2	1	1	2	3	1	2	2	4	3	2	5
2	5	5	5	5	6	4	5	4	5	3	6	6	5	5	6	5	5	5	5	7	5	5	3	2	2	2	3	2	2	2	3	2	2	4	3	4	2	3	3	5
2	1	4	5	5	9	6	7	5	1	1	6	5	5	6	4	2	1	5	1	7	4	5	3	4	4	4	4	1	3	1	2	2	4	2	1	3	3	4	3	4
2	5	5	5	5	6	5	5	5	5	5	5	5	5	6	6	5	5	5	5	5	5	6	2	2	2	2	2	2	3	2	3	2	2	2	2	3	2	3	2	3
2	3	3	6	1	7	7	6	2	1	1	8	9	5	8	2	1	1	5	5	5	1	6	1	4	2	2	1	1	1	2	3	2	3	3	1	2	4	4	2	6
2	1	3	5	5	2	5	5	3	1	5	5	5	5	5	2	3	1	6	5	5	5	5	1	3	2	1	1	2	1	1	1	1	1	3	1	1	2	1	1	6
2	7	5	3	7	9	5	7	2	4	1	5	5	1	7	1	2	5	7	8	7	7	5	2	1	3	3	2	3	2	2	1	1	1	1	1	2	1	3	2	4
2	2	3	6	5	4	5	3	5	2	5	5	6	5	5	3	2	3	1	2	2	5	6	3	1	2	1	2	1	4	1	1	1	1	1	1	2	1	1	1	3
2	2	1	6	2	1	7	5	3	4	1	7	6	4	6	2	1	1	5	3	4	2	6	3	2	2	1	2	1	3	2	3	2	3	2	3	3	2	3	2	3
2	3	5	5	6	5	7	4	3	3	5	6	6	5	5	6	5	5	5	5	5	4	5	2	2	2	2	3	1	3	1	1	2	3	3	3	1	1	4	2	2
2	2	5	5	3	2	6	5	1	1	2	6	7	4	7	5	4	2	5	3	6	4	6	2	3	2	1	1	1	2	1	1	1	4	3	1	1	3	3	2	5
2	4	2	5	2	3	6	4	7	2	5	7	5	5	8	5	4	4	6	5	7	4	5	3	2	2	2	3	2	1	1	2	1	1	1	2	2	4	3	1	2
2	1	1	5	5	8	8	2	8	2	5	6	6	5	5	9	8	3	7	1	8	5	5	2	1	3	1	4	1	1	3	2	2	1	1	3	2	3	2	1	1
2	7	7	5	5	7	5	6	4	7	5	5	5	5	5	5	6	4	5	7	5	5	5	1	1	2	1	2	2	2	3	3	1	2	2	2	3	4	3	2	5
2	6	6	4	6	7	4	6	7	7	3	5	4	5	4	4	6	5	4	5	4	5	4	2	3	4	4	3	3	3	2	3	2	3	2	2	2	3	2	3	3
2	6	8	8	8	9	5	6	5	6	4	5	5	8	4	8	3	3	5	3	2	1	5	4	2	4	3	3	3	2	2	2	4	2	1	4	3	2	2	4	3
2	1	7	5	8	9	6	2	4	1	6	5	3	4	6	3	7	2	6	1	5	5	5	3	3	3	3	2	1	3	2	1	3	4	3	2	2	3	4	3	4
2	6	6	5	6	6	6	6	4	4	5	5	5	4	5	6	5	4	6	2	5	4	5	2	1	3	2	2	3	3	2	2	1	3	1	2	3	1	3	3	3
2	8	7	5	9	9	5	7	9	9	5	1	5	7	5	9	7	7	5	9	5	8	5	4	2	4	4	2	4	4	4	3	1	1	1	3	3	2	3	2	3
2	1	3	5	5	1	5	3	5	2	4	5	5	5	5	2	2	1	2	2	5	2	2	2	1	1	2	2	1	1	2	2	1	1	1	2	2	2	1	2	2
2	7	7	5	7	8	5	6	2	7	3	5	5	2	5	3	3	5	5	5	3	5	5	2	1	3	2	2	4	1	3	1	3	1	1	1	2	3	1	1	2
2	3	3	5	3	1	5	3	3	1	1	5	5	1	5	1	1	1	5	1	5	5	5	1	2	2	1	1	2	1	1	1	1	2	1	1	1	1	1	1	4
2	2	3	5	5	5	5	4	4	2	5	5	5	5	5	5	5	4	6	4	5	5	5	2	1	1	1	1	1	1	1	1	1	1	1	1	3	1	1	1	1
2	3	3	6	1	2	7	2	6	2	5	7	7	6	5	1	1	1	6	1	8	5	8	1	2	1	2	2	1	3	3	1	1	3	2	1	3	2	2	3	3
2	7	4	5	4	8	5	3	3	2	2	7	5	5	5	8	3	3	5	3	5	1	5	1	4	3	2	3	3	1	3	4	2	4	2	1	2	4	4	1	4
2	7	6	6	5	7	5	5	5	5	5	5	5	5	8	5	7	5	7	5	5	5	6	2	1	2	2	2	3	1	1	1	2	3	1	1	3	3	4	2	6
2	7	3	5	3	7	8	6	5	7	2	7	7	3	5	3	6	7	8	5	7	7	8	3	3	3	2	3	2	4	2	3	2	2	3	2	2	4	3	2	5
2	7	3	5	5	8	5	3	3	7	2	5	6	7	5	5	2	4	5	6	5	1	5	2	1	3	2	1	2	2	1	2	4	1	4	3	1	3	3	3	3
2	4	6	5	5	7	5	6	5	4	4	5	5	5	5	4	4	2	5	2	5	2	5	3	3	2	3	3	2	2	1	2	1	2	1	2	2	4	3	3	1
2	4	4	5	4	3	6	5	5	3	5	6	6	5	6	4	2	2	5	4	5	5	6	2	3	2	2	2	2	2	2	3	2	3	3	2	1	3	3	3	5
2	1	1	6	6	1	5	1	4	1	4	5	5	3	5	3	1	1	5	1	3	2	5	1	2	1	1	1	1	3	3	3	1	2	1	1	1	4	3	2	4
2	7	7	5	7	7	5	7	7	7	5	7	5	7	5	3	7	7	5	5	3	7	5	1	4	3	3	2	3	3	2	1	2	4	2	2	2	3	4	2	6
2	4	2	4	1	9	5	5	7	5	5	2	3	1	1	6	4	4	7	6	5	5	6	3	2	4	1	3	3	2	1	1	2	2	1	1	2	3	3	2	4
2	3	2	5	5	9	7	7	2	2	5	5	5	7	5	3	1	1	5	3	3	7	5	4	2	4	4	3	2	4	3	4	3	2	1	2	2	2	2	3	3
2	5	5	5	5	5	5	5	7	5	5	5	5	5	5	3	5	5	5	5	5	5	5	1	1	1	4	1	1	1	3	1	1	1	1	3	2	2	2	4	1
2	7	5	5	5	4	5	7	4	7	5	6	4	5	3	4	5	5	5	5	5	6	5	3	1	2	1	2	3	2	2	2	2	1	1	2	2	3	2	2	2
2	3	3	6	4	6	6	3	3	3	3	6	6	3	6	4	4	4	6	3	6	3	6	2	1	1	1	3	1	2	2	1	1	1	1	2	2	1	2	2	3
2	7	6	5	6	8	5	9	7	6	5	4	5	7	5	6	6	5	5	7	3	5	6	2	1	3	2	2	3	2	1	2	3	1	1	2	2	3	2	2	2
2	6	7	5	7	9	6	8	5	2	5	5	5	6	6	6	5	3	6	6	6	5	5	3	2	4	4	3	3	3	3	4	3	2	1	3	3	2	1	3	4
2	7	6	5	4	9	5	8	5	6	4	5	5	7	5	4	3	1	5	7	7	5	5	3	3	3	3	3	3	2	1	1	3	4	2	2	1	3	3	3	5
2	9	3	5	4	6	5	7	5	8	5	5	6	7	5	5	1	1	3	2	5	3	5	3	2	3	2	3	4	3	1	2	3	3	3	2	1	1	3	2	2
2	4	4	6	4	7	8	3	3	1	3	8	8	3	8	3	3	1	8	1	8	1	8	3	2	4	4	4	4	4	3	4	3	3	4	4	2	2	2	2	3
2	6	5	5	5	8	5	7	7	7	5	6	5	5	5	6	5	5	6	7	5	6	5	3	2	3	3	2	2	3	2	2	2	2	2	2	2	2	2	3	3
2	2	4	5	4	6	5	4	1	1	2	5	5	4	6	4	3	4	2	6	4	6	6	3	1	3	1	1	1	2	1	2	2	1	1	1	1	1	2	1	1
2	6	4	5	5	7	6	5	4	6	5	5	5	5	6	4	4	5	6	5	5	5	6	3	2	3	2	2	3	2	2	2	2	2	2	2	3	2	2	3	4
2	2	3	5	5	6	5	2	1	1	4	6	6	3	5	2	2	1	5	3	4	3	5	3	1	2	2	2	1	3	1	1	1	2	1	1	1	1	3	2	2
2	3	4	5	5	1	5	6	5	1	2	5	5	3	5	2	4	2	5	3	5	6	5	2	3	1	2	1	2	2	4	2	1	3	4	1	2	3	3	2	6
2	8	8	5	5	9	5	5	5	5	4	6	5	5	6	4	3	4	5	5	6	5	5	2	1	4	2	2	3	2	2	2	1	1	1	2	2	2	3	1	5
2	6	6	5	5	8	5	6	5	6	5	5	5	5	6	6	5	7	5	7	5	5	5	3	1	3	1	2	3	2	2	2	2	3	2	2	2	2	3	3	5
2	6	5	5	5	5	6	5	6	5	5	5	5	6	5	6	5	5	5	5	5	5	5	3	2	1	1	1	2	3	4	4	3	1	4	2	3	1	1	4	2
2	7	5	5	5	6	5	6	4	5	5	5	5	6	5	5	5	3	5	5	5	3	6	2	1	1	1	2	3	1	1	1	2	1	1	1	1	4	3	2	6
2	9	9	5	9	9	1	9	9	9	5	1	1	7	1	9	9	9	1	9	1	9	1	3	3	4	2	2	3	3	3	1	2	3	3	2	2	2	3	4	6
2	3	3	5	1	7	7	4	3	3	1	7	6	6	5	1	1	1	6	1	7	1	6	3	2	3	2	2	3	2	2	2	2	2	1	2	2	3	3	2	6
2	9	9	5	9	9	1	9	9	9	5	1	1	7	1	9	9	9	1	9	1	9	1	3	3	4	2	2	3	3	3	1	2	3	3	2	2	2	3	4	6
2	7	7	5	5	8	5	5	4	7	4	5	5	6	5	6	5	4	5	5	3	5	5	2	2	4	2	3	4	1	3	1	1	3	2	2	2	3	3	1	5
2	7	6	4	1	9	2	9	8	8	5	2	5	8	1	7	2	1	2	8	2	5	5	2	3	3	2	2	3	2	2	2	3	3	3	3	3	3	4	3	4
2	3	3	5	6	5	5	3	6	5	3	6	6	5	6	4	2	1	1	1	6	2	6	3	3	1	1	3	1	3	1	1	1	4	2	1	2	3	3	1	5
2	5	5	2	5	7	5	6	5	2	2	5	5	7	6	5	5	4	5	5	5	5	5	2	2	3	3	2	2	4	4	4	2	2	2	3	2	3	3	2	4
2	7	6	3	3	4	5	6	8	6	5	5	5	5	5	2	2	2	6	4	6	3	4	2	1	2	2	4	3	3	3	2	2	2	2	3	3	2	3	3	7
2	7	8	2	2	8	5	2	5	7	5	5	5	6	3	1	2	1	5	8	3	7	3	1	1	3	2	3	4	2	1	1	2	3	2	1	3	3	3	2	2
2	4	4	5	5	9	7	9	4	7	4	6	3	4	5	7	6	4	5	7	5	5	4	3	3	4	2	4	3	3	2	2	3	3	1	2	2	2	3	2	3
2	7	7	5	5	1	5	5	3	1	1	5	5	5	4	1	1	1	5	1	5	4	5	1	2	3	2	1	3	2	2	3	3	3	4	3	3	3	3	2	4
2	7	7	5	2	7	5	5	4	6	5	5	5	6	5	3	2	5	5	3	6	5	6	2	1	4	1	1	3	2	1	1	1	1	1	1	3	2	1	2	1
2	2	5	5	5	4	5	5	5	2	4	5	5	4	6	3	3	1	6	1	6	3	6	2	1	2	1	1	1	1	2	1	1	1	1	1	2	2	1	1	1
2	7	9	4	5	9	5	9	5	6	4	6	3	9	4	6	3	3	4	4	2	5	4	2	2	4	4	4	4	3	2	2	4	2	1	1	2	1	3	3	3
2	6	7	8	9	6	5	7	9	6	2	3	5	7	2	1	1	1	2	7	6	7	9	3	1	3	2	2	1	3	2	2	1	1	1	2	2	2	2	2	2
2	3	4	6	4	1	7	3	4	4	2	5	6	5	5	3	3	4	5	5	5	5	5	2	1	3	1	2	1	3	1	1	2	1	1	1	2	1	2	2	1
2	6	1	5	1	9	9	9	5	1	3	5	6	9	2	8	4	7	2	9	3	4	5	4	1	3	3	4	3	4	3	3	4	2	2	2	2	2	2	3	1
2	5	5	4	6	7	5	7	6	7	2	5	5	5	3	1	1	1	1	1	1	1	5	3	1	3	2	2	2	2	2	2	2	1	1	1	2	2	3	3	2
2	7	6	5	6	7	5	8	5	4	5	5	5	5	5	3	4	4	3	5	5	3	5	1	1	3	2	2	2	2	2	2	3	2	1	2	2	2	1	2	4
2	5	4	5	4	7	5	4	5	4	6	5	5	5	5	6	5	4	5	4	5	5	5	2	3	3	1	2	1	1	1	1	1	2	2	1	2	2	3	2	5
2	7	9	3	5	7	4	7	9	7	4	3	3	5	5	3	5	4	5	1	5	5	5	4	3	3	4	4	4	3	2	3	2	3	3	3	2	4	3	3	6
2	2	3	5	4	7	5	8	4	1	1	5	5	6	5	3	1	1	3	1	6	4	5	2	4	3	4	2	3	2	1	1	2	4	4	1	1	4	4	4	8
2	3	3	5	2	7	7	3	5	2	6	3	5	3	6	6	6	3	7	4	3	4	5	3	3	3	3	2	3	3	3	3	1	3	2	3	3	2	3	3	3
2	9	8	8	5	9	7	8	8	6	5	6	5	7	6	5	4	5	8	5	3	5	5	2	2	2	3	3	2	1	2	1	2	2	3	3	2	2	4	3	3
2	2	5	5	5	4	5	5	5	2	4	5	5	4	6	3	3	1	6	1	6	3	6	2	1	2	1	1	1	1	2	1	1	1	1	1	2	2	1	1	1
2	5	4	5	4	7	5	4	5	4	6	5	5	5	5	6	5	4	5	4	5	5	5	2	3	3	1	2	1	1	1	1	1	2	2	1	2	2	3	2	5
2	5	5	5	5	7	6	5	5	7	5	7	7	5	6	6	3	3	5	5	5	7	6	2	1	3	1	2	3	1	3	2	1	1	1	2	3	2	1	1	3
2	7	7	6	8	7	7	6	7	7	5	7	5	7	5	3	3	3	4	7	5	5	6	3	2	4	4	2	4	2	2	2	3	2	1	2	3	1	3	3	3
2	7	7	5	5	7	6	5	5	6	5	5	5	7	5	6	5	7	8	4	5	5	7	2	2	3	3	3	3	3	3	2	2	1	2	1	2	2	2	2	4
2	3	5	5	5	7	5	5	1	1	5	5	5	5	5	2	3	3	5	5	5	3	5	4	1	4	1	1	1	3	1	1	1	1	1	1	2	2	1	1	1
2	6	6	2	6	9	5	8	5	7	1	5	4	5	4	3	7	8	5	6	5	9	5	3	2	4	3	3	4	3	3	2	3	3	2	2	3	3	3	3	5
2	1	1	5	5	9	5	9	5	1	5	7	5	9	5	9	1	1	5	1	6	5	5	4	1	3	3	3	1	4	2	1	2	3	2	1	1	3	2	3	2
2	1	2	5	7	7	5	5	4	1	3	5	5	5	5	7	1	2	6	1	5	5	5	2	1	3	2	3	1	2	3	3	1	1	1	3	3	2	1	2	3
2	7	7	5	4	2	5	7	4	6	3	5	5	6	6	2	3	2	5	1	6	3	6	3	1	2	2	3	4	2	2	1	3	2	1	1	2	2	2	2	3
2	6	7	5	4	6	5	4	4	4	5	5	6	4	5	3	5	4	5	5	5	5	5	2	3	2	1	3	3	2	3	3	1	4	3	3	4	2	4	3	4
2	5	5	5	5	6	6	6	5	5	5	6	5	5	5	5	5	5	5	5	6	5	6	2	3	2	2	2	2	3	2	2	2	3	3	2	3	3	4	2	5
2	4	4	5	5	4	5	5	6	4	5	5	5	6	5	3	3	3	6	3	5	3	5	3	2	4	2	3	2	3	3	2	2	2	2	4	3	2	2	2	1
2	3	8	5	8	5	5	8	7	2	5	6	5	7	3	7	5	2	2	2	2	7	5	4	3	4	2	3	3	4	1	3	3	2	1	3	3	2	2	3	1
2	7	6	5	6	7	5	7	4	6	4	5	5	7	5	6	7	4	5	6	5	5	5	3	2	3	2	2	3	1	1	2	3	2	2	1	2	2	2	2	4
2	5	5	5	5	6	6	5	4	4	5	6	5	5	6	4	5	5	5	5	6	5	5	1	1	2	1	1	2	1	1	2	1	2	1	2	2	3	3	1	5
2	1	4	6	4	3	8	5	5	3	4	8	7	6	7	4	3	1	7	2	5	3	8	2	1	1	1	2	1	1	1	1	1	1	1	1	1	2	2	1	1
2	5	5	5	5	7	5	8	6	7	5	5	5	6	5	5	7	5	6	6	5	8	7	2	1	4	3	2	2	2	2	2	1	2	1	1	2	1	2	2	1
2	7	5	5	6	6	4	6	4	7	3	4	5	4	5	3	3	4	3	3	5	6	6	2	3	3	2	2	3	3	2	2	3	3	2	2	1	2	3	3	5
2	6	6	5	1	1	5	6	1	1	3	5	5	7	6	1	1	1	5	6	5	1	5	2	1	3	1	1	1	2	2	2	3	2	1	1	2	3	4	1	6
2	5	5	5	5	6	6	5	4	4	6	5	5	7	6	5	5	5	6	7	6	5	6	2	1	2	1	2	2	2	1	1	3	2	1	1	1	2	1	1	4
2	6	7	5	5	6	4	6	3	2	2	5	6	3	5	6	3	1	5	5	3	6	6	3	2	3	2	2	3	2	3	2	4	3	4	3	2	3	3	3	3
2	1	4	6	4	3	8	5	5	3	4	8	7	6	7	4	3	1	7	2	5	3	8	2	1	1	1	2	1	1	1	1	1	1	1	1	1	2	2	1	1
2	1	4	6	4	3	8	5	5	3	4	8	7	6	7	4	3	1	7	2	5	3	8	2	1	1	1	2	1	1	1	1	1	1	1	1	1	2	2	1	1
2	9	8	1	9	9	1	9	9	9	8	2	1	9	3	6	1	5	5	5	6	9	5	3	3	4	3	3	4	2	2	3	4	1	1	3	4	3	3	4	4
2	8	7	5	7	8	5	7	3	9	3	6	5	7	5	8	9	9	5	5	2	8	5	3	3	4	3	1	4	4	3	3	4	3	3	3	3	4	3	3	4
2	8	6	5	7	9	5	5	8	7	4	6	5	7	6	6	5	4	4	4	6	3	6	2	1	3	4	3	4	2	2	3	2	1	1	3	3	1	1	4	1
2	4	5	7	3	8	7	4	5	4	4	5	5	5	5	4	4	3	5	4	5	5	5	2	2	3	3	1	1	2	1	2	1	3	1	1	2	3	2	3	2
2	5	5	5	5	9	5	8	3	1	5	5	5	5	5	7	5	7	5	5	5	7	5	2	2	3	1	2	1	2	3	2	1	2	1	2	3	1	2	1	3
2	5	6	5	5	6	5	5	5	5	5	6	5	5	5	5	5	5	5	5	5	5	5	2	1	2	2	2	1	2	2	2	2	2	3	2	2	2	2	2	4
2	6	8	6	3	6	7	5	6	3	7	4	6	5	7	6	7	7	5	5	9	9	5	2	3	4	2	2	4	3	3	3	3	2	3	2	2	2	4	2	4
2	7	7	5	7	3	5	7	5	7	5	5	5	6	5	4	7	3	5	7	5	5	5	3	2	2	2	3	3	2	2	4	3	2	2	2	3	1	3	3	3
2	1	2	5	2	8	5	2	5	1	5	5	5	5	5	5	2	2	5	1	5	5	5	3	1	4	1	2	1	1	2	1	1	1	1	4	2	2	3	2	2
2	2	2	8	3	1	9	4	4	2	5	9	5	6	4	2	2	2	5	3	2	5	6	4	1	1	3	2	1	3	4	2	4	1	1	2	1	4	2	1	1
2	8	5	5	5	9	5	4	4	2	1	5	5	5	6	2	1	1	5	5	5	2	5	4	2	4	3	3	2	2	4	1	2	3	1	1	3	1	4	3	3
2	1	9	5	5	9	5	9	1	1	5	5	5	1	5	4	1	6	7	5	5	3	6	3	4	4	2	2	2	3	1	1	4	3	2	1	1	3	3	3	4
2	7	7	5	7	7	1	6	5	6	5	5	5	5	5	7	1	1	5	8	5	7	5	2	4	2	1	2	3	1	1	1	1	4	4	1	2	3	4	2	7
2	5	5	5	5	5	5	5	5	5	5	5	5	5	5	5	5	5	5	5	5	5	5	3	1	1	1	1	1	1	1	1	1	1	3	1	1	3	3	1	4
2	7	5	5	7	9	5	7	5	7	5	5	5	5	5	4	4	4	5	5	5	5	5	2	1	3	1	1	3	1	1	1	1	1	2	1	2	3	1	1	3
2	3	7	5	8	9	5	7	4	9	3	5	4	8	4	3	1	2	4	7	4	6	5	3	2	4	3	3	2	3	3	3	4	2	1	3	4	2	2	4	3
2	6	6	7	8	9	3	9	9	6	7	3	1	5	4	3	5	1	5	5	4	4	5	2	1	2	1	1	2	1	1	1	1	1	2	1	2	1	2	2	4
2	3	6	5	6	7	5	7	5	1	4	5	5	4	5	3	1	2	3	7	4	5	5	2	1	4	2	2	2	4	2	3	2	2	2	2	2	2	3	2	3
2	8	4	5	5	9	5	9	3	9	5	5	5	9	5	1	3	1	5	9	5	5	5	3	1	4	3	3	3	3	3	4	3	2	1	3	3	3	1	3	2
2	8	7	3	8	4	5	4	5	3	5	5	6	5	6	2	7	3	7	4	5	5	6	2	2	4	2	3	2	2	3	2	1	3	2	1	2	2	2	3	7
2	4	5	5	4	6	5	6	5	5	5	5	5	6	5	3	3	5	4	5	5	5	6	3	1	2	1	1	1	1	1	1	1	2	2	2	3	1	2	2	2
2	2	4	7	3	2	8	5	7	1	4	5	8	1	8	1	2	1	9	5	8	5	9	4	1	2	3	4	1	4	4	4	2	1	1	3	4	2	1	3	1
2	7	5	3	5	9	5	4	3	3	3	5	3	3	5	2	3	3	2	5	3	2	5	3	4	4	3	3	3	3	3	2	3	3	2	1	2	3	3	3	5
2	4	4	5	5	2	6	4	3	2	2	5	5	6	5	1	5	2	5	4	6	4	5	2	1	1	1	2	1	3	1	1	1	1	1	1	3	2	2	2	2
2	3	3	7	1	7	7	3	2	1	2	5	5	3	7	3	2	1	7	1	5	5	5	2	1	2	1	2	1	2	1	2	2	2	4	2	1	1	3	2	3
2	2	2	7	2	7	7	2	5	2	5	7	7	5	7	2	2	1	7	1	7	5	5	3	4	3	3	3	1	3	2	2	3	4	4	3	2	3	4	3	6
2	5	7	5	7	9	6	8	3	3	3	7	5	7	5	7	5	9	5	5	4	7	5	3	3	3	3	3	2	3	3	3	2	3	2	3	4	3	3	3	3
2	3	3	5	7	8	5	3	2	3	3	5	6	5	6	3	3	4	4	2	5	4	7	1	2	2	2	1	1	2	2	1	2	3	2	1	1	2	2	1	3
2	2	2	7	1	1	7	1	6	1	1	7	6	1	6	3	6	1	8	1	6	1	7	3	1	3	1	1	2	3	2	1	1	2	3	2	2	3	2	3	3
2	3	6	4	3	7	8	2	6	3	3	5	7	3	5	4	3	2	6	2	2	4	7	1	1	3	2	1	1	1	1	1	2	1	1	1	1	2	1	2	1
2	3	5	5	5	7	5	5	8	3	5	8	8	5	6	2	6	1	1	6	3	2	3	3	3	2	1	3	3	3	1	1	2	3	1	3	2	1	2	3	2
2	7	9	5	9	9	5	9	5	3	1	5	5	9	5	9	7	5	5	9	1	9	5	4	2	4	4	4	3	4	4	3	4	2	2	3	4	2	2	4	1
2	1	5	5	5	9	7	5	3	1	1	9	7	5	7	1	5	1	5	1	7	1	5	1	1	3	4	2	1	2	4	3	2	2	2	2	1	1	2	3	3
2	2	2	6	2	7	8	1	1	1	1	5	9	1	5	5	5	2	8	3	5	2	9	3	3	3	3	4	1	2	1	1	3	3	4	2	3	3	3	2	6
2	7	8	5	4	6	7	8	7	7	5	7	4	5	5	6	6	8	5	5	2	7	5	1	3	3	2	1	3	2	2	1	3	3	2	1	1	3	2	3	3
2	5	7	6	7	9	5	4	4	4	9	5	6	6	6	4	6	8	6	8	6	8	5	3	1	4	2	3	2	3	1	1	1	2	2	3	2	1	2	2	2
2	1	5	7	4	6	8	2	5	2	5	7	9	5	6	4	1	4	5	5	7	4	6	3	4	3	2	2	1	4	3	1	2	4	2	1	2	1	3	3	4
2	5	5	5	5	7	6	5	3	2	5	5	5	5	5	6	5	4	6	5	5	4	6	2	2	1	1	3	2	3	1	1	1	1	2	1	1	2	2	2	4
2	4	7	5	8	9	5	9	7	3	5	6	6	8	5	5	6	3	5	5	6	7	5	4	1	4	4	4	3	4	2	4	2	1	1	3	1	4	2	3	3
2	7	5	5	5	7	8	5	5	8	4	6	5	7	5	5	5	7	5	8	5	5	6	2	2	3	2	2	4	3	3	1	3	3	4	2	2	2	3	2	4
2	7	7	5	7	9	5	4	3	7	5	5	5	2	5	3	5	5	5	5	4	6	5	2	1	4	1	1	3	1	1	1	1	1	1	1	3	2	2	2	3
2	3	3	5	6	3	5	4	4	4	3	7	7	5	5	2	3	2	5	2	4	5	6	2	2	2	2	3	2	3	3	1	2	2	2	2	2	1	3	1	4
2	7	7	5	4	1	5	8	6	3	2	5	5	7	5	7	2	1	5	6	5	4	6	2	1	2	3	3	2	1	2	3	3	1	2	3	2	3	2	2	3
2	8	6	4	6	7	5	6	5	8	4	5	5	6	5	6	4	5	5	6	5	7	5	2	3	3	2	2	4	2	3	3	2	3	1	3	1	3	3	2	3
2	3	3	7	3	3	5	2	5	3	3	7	6	6	6	2	2	5	7	7	7	7	7	2	3	2	2	2	2	3	2	2	3	3	2	2	2	3	3	2	6
2	7	6	5	8	7	6	4	4	5	3	5	5	6	5	6	5	4	5	8	5	4	6	2	2	3	1	2	3	3	2	2	3	3	2	3	2	3	4	2	1
2	7	7	5	8	9	5	9	9	9	3	5	5	7	3	8	2	3	5	7	5	9	7	2	2	3	1	1	4	3	1	1	4	2	3	1	2	3	3	3	5
2	8	5	4	1	9	6	5	9	9	3	4	9	5	5	9	9	9	9	9	9	9	9	4	1	4	4	4	3	4	4	4	4	4	4	4	3	2	2	4	3
2	7	1	5	1	1	5	5	1	7	1	5	5	7	5	7	1	3	6	6	5	4	5	2	1	2	1	3	2	2	2	3	1	1	1	1	2	1	2	3	1
2	2	3	5	5	3	6	6	5	3	5	7	5	5	5	3	5	3	6	3	5	4	6	3	2	2	1	2	1	2	1	1	3	2	2	2	2	2	2	2	1
2	6	8	5	5	6	6	7	9	6	5	1	5	5	5	6	7	5	5	3	5	5	5	3	1	3	1	3	2	2	3	2	2	2	1	3	3	3	2	2	2
2	6	4	5	7	8	4	2	5	7	1	1	1	6	2	7	6	5	5	6	6	5	5	4	1	4	4	4	4	3	3	3	3	1	1	3	4	2	2	3	1
2	7	7	5	5	7	6	5	3	7	5	4	5	8	5	5	3	1	5	9	7	5	9	2	1	2	3	4	3	2	2	3	3	4	3	2	2	3	2	3	6
2	7	7	4	6	9	5	7	4	7	6	2	5	2	5	4	6	5	4	7	4	5	5	3	3	4	3	2	3	3	2	3	1	3	2	1	1	3	3	3	5
2	6	7	4	5	6	5	6	5	7	5	5	5	4	5	6	5	6	5	5	4	5	5	2	1	3	2	2	2	2	1	1	2	2	3	2	2	3	2	2	3
2	9	9	5	9	9	5	9	7	9	7	5	5	1	5	9	8	8	4	9	5	7	5	2	1	4	2	3	4	2	3	1	1	4	4	1	2	4	3	2	3
2	7	9	5	4	8	5	3	5	4	2	7	5	8	6	3	2	4	5	7	5	3	7	3	1	3	2	2	3	2	3	2	3	1	1	2	3	3	2	2	3
2	1	1	5	1	3	6	3	5	2	1	5	5	5	5	4	1	4	5	5	5	4	5	2	1	1	1	1	1	2	2	1	1	1	1	1	1	1	1	2	1
2	1	7	5	1	1	9	8	4	1	1	9	9	7	9	1	1	1	9	1	7	1	9	3	4	2	4	2	1	3	4	1	1	4	4	2	2	3	4	3	8
2	7	7	5	4	8	7	5	6	6	5	5	5	3	5	6	3	5	5	5	3	5	5	3	3	3	3	3	3	3	3	2	1	3	2	2	3	2	2	4	3
2	1	1	5	1	5	5	1	1	1	5	5	5	5	5	1	1	1	5	1	5	1	5	1	1	1	1	2	1	1	1	1	1	3	3	1	1	3	4	1	6
2	1	9	5	7	9	6	9	3	2	8	5	5	1	5	9	8	8	3	3	4	8	6	4	1	4	3	2	4	3	2	2	4	1	1	2	2	1	2	3	1
2	1	2	5	8	9	5	9	9	9	5	5	5	9	5	1	9	9	5	9	5	9	5	4	2	4	4	4	4	3	2	2	2	2	2	3	2	3	1	3	6
2	9	9	1	9	9	5	9	5	9	9	5	5	5	5	9	9	5	5	1	5	9	5	2	3	4	4	4	4	2	2	2	4	3	4	4	4	3	4	4	4
2	9	5	5	5	9	5	7	5	9	5	5	5	5	5	7	1	1	5	1	3	1	5	1	2	4	3	1	4	1	1	1	1	3	1	1	2	4	3	2	4
2	2	2	4	2	2	7	2	7	2	2	8	8	6	5	1	1	1	5	1	1	1	5	2	3	1	1	3	1	1	1	1	1	3	4	1	1	1	2	1	4
2	2	6	5	6	7	5	3	4	1	4	5	5	4	5	3	4	2	5	1	5	3	5	2	1	2	1	3	1	2	1	1	2	1	1	1	1	1	1	1	2
2	6	5	5	5	7	6	6	3	7	3	5	5	5	5	1	4	1	5	5	7	5	5	2	1	3	1	2	3	3	4	2	1	2	2	2	2	3	2	1	4
2	6	3	1	2	9	5	3	8	1	8	1	7	9	2	5	5	5	5	3	5	5	5	1	1	1	2	2	2	1	2	1	1	3	4	2	2	4	2	2	4
2	1	7	5	5	3	6	5	5	5	5	5	5	5	5	5	6	5	3	1	5	5	5	3	3	3	2	1	2	2	2	1	1	3	3	3	2	2	3	3	5
2	4	5	5	5	4	5	5	5	4	4	5	5	4	5	4	5	4	5	5	5	5	5	2	2	2	1	2	2	2	2	1	2	1	1	1	2	4	3	1	5
2	7	5	4	6	9	3	7	5	8	5	5	4	7	6	6	4	5	2	5	2	5	6	3	1	3	2	3	3	2	2	1	2	2	1	2	3	3	3	2	4
2	4	4	5	4	8	8	4	5	4	5	8	8	5	9	4	3	3	5	3	8	3	5	4	1	3	4	4	2	4	4	4	1	1	1	4	4	2	2	4	3
2	4	6	5	5	9	6	4	9	2	1	2	4	5	3	7	7	7	4	5	4	4	6	2	3	2	4	2	3	3	1	3	1	3	4	2	1	4	3	4	4
2	5	3	6	2	9	7	7	7	5	8	5	8	1	5	9	4	3	4	9	5	7	5	2	2	4	4	3	4	3	3	2	1	1	1	3	3	3	3	3	4
2	5	5	5	5	5	5	5	5	5	5	5	5	5	5	5	5	5	5	5	5	5	5	1	1	1	1	1	1	1	1	1	1	1	1	1	1	3	4	1	7
2	2	6	6	3	7	5	7	2	2	2	6	5	6	5	5	5	3	2	5	1	6	5	2	1	2	2	3	1	3	3	3	3	1	1	1	2	2	2	2	3
2	3	5	7	5	3	7	3	5	3	4	5	5	5	7	2	2	2	5	3	7	5	7	1	1	1	1	1	1	3	4	2	2	1	1	3	3	4	1	2	1
2	1	3	7	3	7	8	3	3	1	2	7	6	5	6	5	3	5	7	2	5	5	6	1	1	2	2	3	1	2	3	3	1	1	1	3	2	1	1	3	1
2	1	3	7	3	7	8	3	3	1	2	7	6	5	6	5	3	5	7	2	5	5	6	1	1	2	2	3	1	2	3	3	1	1	1	3	2	1	1	3	1
2	7	5	5	4	7	7	6	5	5	4	5	6	4	5	7	2	1	5	4	5	5	7	2	2	4	3	2	3	3	2	1	1	3	2	1	1	3	2	2	5
2	5	5	6	4	8	6	3	4	2	5	5	5	7	5	4	3	3	6	6	5	4	5	2	1	3	2	3	3	3	4	2	3	1	1	4	3	2	3	3	3
2	9	1	5	4	9	8	1	9	9	5	7	7	9	9	4	1	1	5	9	8	1	5	1	3	4	4	3	4	1	4	1	1	1	1	4	3	1	4	3	1
2	4	3	5	3	4	6	2	2	1	5	7	5	4	6	4	3	3	3	3	7	4	7	3	2	2	3	3	2	2	2	2	2	2	3	2	1	3	2	2	2
2	9	9	1	9	9	1	9	9	9	5	1	1	9	1	9	8	1	1	9	1	9	1	4	3	4	4	4	4	3	2	2	4	3	3	3	2	4	3	4	4
2	9	9	5	9	9	5	9	9	9	4	9	3	9	5	9	3	9	5	5	1	9	4	2	1	4	4	4	4	3	4	4	4	3	3	4	3	3	2	4	5
2	8	8	8	8	9	8	7	5	5	4	5	5	1	5	6	5	5	3	3	5	5	5	3	2	4	2	2	3	2	2	1	2	4	2	2	1	2	2	3	3
2	5	5	5	5	5	5	5	5	5	5	7	7	5	5	5	4	3	5	5	5	5	5	2	1	1	1	2	1	1	4	3	1	1	3	4	4	3	3	2	5
2	4	7	5	7	8	5	6	9	4	5	5	5	7	5	5	5	5	5	5	6	5	5	1	1	2	2	4	2	3	3	3	1	1	1	3	3	1	2	2	1
2	5	7	5	7	7	5	7	2	7	2	5	7	5	5	2	2	2	7	5	5	5	7	3	1	3	1	2	2	3	1	2	2	2	2	2	2	3	2	2	3
2	9	5	1	5	9	5	8	9	9	5	1	5	9	5	9	5	9	9	9	9	9	5	4	1	4	4	4	4	2	2	1	4	3	3	3	3	1	3	3	4
2	3	3	4	3	7	7	5	5	3	3	6	6	4	6	4	4	3	3	4	6	4	7	2	2	3	4	2	1	2	3	3	2	3	3	3	3	4	2	3	6
2	9	9	5	9	9	5	9	9	9	9	5	5	9	5	1	5	5	5	9	9	9	5	3	3	4	4	4	4	3	4	4	4	2	1	3	3	2	3	4	2
2	5	6	4	6	9	4	5	9	8	9	1	5	1	5	9	9	9	1	1	1	9	1	1	4	1	1	1	1	1	1	1	1	4	1	1	2	3	3	1	4
2	3	3	7	3	7	5	2	3	1	1	7	7	5	6	3	3	3	4	4	5	4	6	3	1	2	1	1	2	2	1	1	2	1	4	1	1	1	3	2	4
2	9	9	3	7	9	3	9	3	9	2	2	1	6	3	7	8	9	5	5	2	5	5	2	3	4	2	4	4	1	1	2	3	3	3	2	3	2	4	3	5
2	4	6	5	6	6	5	5	4	6	4	5	6	4	6	6	3	6	5	5	5	6	5	3	1	2	2	2	1	2	2	2	1	1	1	1	2	3	2	1	6
2	3	3	6	3	7	5	3	5	3	3	6	5	5	5	3	3	3	5	3	6	3	5	3	3	3	3	3	2	3	3	3	3	3	2	2	3	2	2	2	1
2	7	7	5	4	9	8	4	5	3	8	8	7	2	5	8	5	1	9	8	5	3	5	3	2	4	3	3	3	4	2	3	2	3	3	3	4	3	3	3	4
2	6	5	5	4	7	5	7	4	5	5	5	5	4	5	7	5	4	6	5	5	6	5	3	1	3	4	3	2	2	3	3	2	2	1	2	3	2	3	2	3
2	6	1	5	4	3	6	2	5	4	5	6	5	3	5	3	2	1	2	6	5	5	5	3	4	2	3	2	2	4	1	1	2	4	3	1	1	3	3	2	6
2	2	1	6	1	3	6	1	5	1	4	4	1	1	4	1	1	1	5	5	5	1	5	2	1	1	1	2	1	2	1	1	1	2	2	1	1	3	2	1	4
2	1	1	2	1	9	6	2	1	1	1	7	7	6	4	1	1	1	4	6	6	3	7	2	1	4	4	2	1	1	2	1	1	2	2	2	2	4	4	2	4
2	6	1	5	4	3	6	2	5	4	5	6	5	3	5	3	2	1	2	6	5	5	5	3	4	2	3	2	2	4	1	1	2	4	3	1	1	3	3	2	6
2	1	1	5	1	9	5	9	3	9	5	5	5	9	6	2	1	1	6	1	5	1	5	4	2	4	4	4	4	4	4	4	4	4	3	2	2	1	1	4	2
2	5	5	5	5	7	5	7	5	5	5	5	5	5	5	5	5	5	5	5	6	5	5	2	1	2	3	3	2	2	2	2	1	1	1	2	3	2	1	2	1
2	2	3	8	7	1	8	4	4	1	1	6	8	5	8	2	3	2	6	5	6	3	6	2	4	1	1	3	1	2	2	2	1	3	3	3	2	2	3	2	5
2	9	1	5	1	9	5	9	1	9	1	5	5	5	5	7	5	9	3	5	1	9	4	3	1	4	3	1	4	3	4	2	1	1	2	3	3	1	2	3	1
2	5	7	5	5	8	7	7	7	5	6	5	4	5	5	7	5	5	5	5	4	7	7	2	2	3	3	2	2	3	4	2	2	2	2	1	2	1	2	4	3
2	2	2	7	3	2	6	2	6	1	1	3	4	6	2	6	8	9	5	6	6	6	7	2	1	1	1	1	1	2	3	1	1	1	1	1	2	3	1	1	2
2	1	5	5	5	5	5	5	5	5	5	5	5	1	5	5	5	1	5	5	5	5	5	1	2	1	1	1	1	1	1	1	1	2	1	1	2	4	3	1	8
2	5	5	6	5	8	7	8	6	2	5	5	5	6	5	3	5	3	2	5	5	5	5	2	3	4	2	2	3	4	2	4	3	4	2	1	1	3	2	3	7
2	2	2	3	2	1	5	3	2	1	1	4	5	5	4	1	1	1	5	1	5	5	6	2	1	1	2	2	2	2	2	2	2	2	2	1	1	2	3	2	3
2	9	6	5	8	9	6	9	9	9	5	5	3	8	4	3	3	6	3	3	2	6	3	3	2	4	3	4	4	4	4	2	4	2	2	3	3	3	4	1	4
2	4	7	4	7	8	5	4	4	3	4	5	5	1	5	7	5	4	6	4	5	5	5	2	4	3	3	2	2	3	1	2	2	4	3	1	2	4	4	3	5
2	1	1	6	4	1	7	3	5	1	3	6	6	6	6	6	1	1	5	1	6	4	6	3	2	2	2	3	2	3	2	3	3	2	2	2	2	3	2	2	3
2	1	3	6	5	6	7	5	5	1	5	7	5	7	8	1	1	1	7	1	5	5	7	3	2	2	3	3	1	3	3	2	3	3	2	2	2	2	3	3	3
2	1	9	1	5	9	1	9	1	1	1	1	1	1	1	1	1	1	1	1	1	1	5	4	1	1	1	3	1	4	3	1	1	1	1	1	1	1	1	1	1
2	1	3	6	5	6	7	5	5	1	5	7	5	7	8	1	1	1	7	1	5	5	7	3	2	2	3	3	1	3	3	2	3	3	2	2	2	2	3	3	3
2	1	1	5	1	1	5	1	1	1	1	5	5	1	5	1	1	1	5	1	5	1	5	1	1	1	1	1	1	1	1	1	1	1	1	1	1	1	1	1	1
2	3	3	5	5	3	7	3	3	2	4	7	8	3	4	3	2	2	5	2	7	2	6	3	2	2	3	2	2	3	3	3	2	1	1	2	2	3	2	3	4
2	7	3	3	7	9	5	9	2	7	1	5	5	5	5	3	3	5	1	5	1	5	5	2	2	4	4	3	4	3	1	1	2	2	2	2	1	1	2	3	1
2	9	9	5	5	9	5	9	3	8	3	5	5	9	5	9	9	2	9	1	6	5	5	3	2	4	4	3	4	3	4	3	4	2	2	3	2	1	3	4	3
2	3	4	8	5	7	8	3	7	3	3	8	8	7	7	3	1	2	5	3	6	3	8	3	2	3	4	4	2	3	4	4	3	1	1	3	2	3	2	3	2
2	4	3	5	3	5	6	5	4	3	4	6	5	5	5	4	3	3	5	3	3	5	6	3	2	1	1	3	1	1	3	2	2	3	1	1	2	4	4	1	4
2	7	3	3	7	9	5	9	2	7	1	5	5	5	5	3	3	5	1	5	1	5	5	2	2	4	4	3	4	3	1	1	2	2	2	2	1	1	2	3	1
2	5	5	5	5	8	5	5	5	2	5	6	5	6	5	6	5	2	5	3	5	3	5	3	1	4	3	3	2	2	3	2	3	1	1	3	2	1	1	2	1
2	8	8	8	8	9	8	8	6	4	3	5	6	5	5	2	1	2	6	5	6	5	6	3	1	4	3	2	3	2	4	3	2	2	2	2	2	3	2	3	7
2	9	9	5	5	9	5	7	7	9	5	5	5	1	5	9	9	9	4	9	4	6	5	4	3	4	4	2	4	4	1	1	4	3	3	1	2	1	1	4	5
2	7	3	5	3	2	5	8	6	7	5	5	5	7	3	7	5	1	5	6	5	3	5	2	2	2	2	2	3	2	2	2	3	2	2	1	2	2	2	2	3
2	9	1	5	3	9	6	7	1	1	1	5	5	5	7	9	1	3	5	5	5	5	7	3	1	4	3	4	4	3	4	3	1	1	1	4	3	1	2	4	1
2	6	3	5	4	6	5	4	4	4	5	5	5	5	5	2	4	2	5	5	5	4	5	2	1	1	1	2	2	2	1	3	1	1	1	1	2	1	1	2	3
2	3	3	7	5	7	7	3	5	3	7	5	7	7	7	3	3	3	7	3	7	3	7	3	1	3	1	1	1	2	1	1	1	2	3	1	2	2	4	1	6
2	9	1	5	9	1	5	7	9	1	5	5	5	1	5	1	1	1	5	9	5	7	5	3	1	2	4	4	3	4	4	3	1	1	1	2	3	3	2	3	3
2	7	8	5	8	8	6	8	5	7	5	6	5	5	5	6	6	5	5	3	5	6	6	3	1	4	4	3	3	3	3	3	2	2	2	2	2	3	3	3	2
2	7	8	5	8	8	6	8	5	7	5	6	5	5	5	6	6	5	5	3	5	6	6	3	1	4	4	3	3	3	3	3	2	2	2	2	2	3	3	3	2
2	1	2	5	1	4	6	2	4	1	2	5	6	4	6	2	4	2	6	5	5	3	5	4	4	1	1	2	1	3	1	1	1	4	2	1	1	4	3	1	2
2	1	9	5	5	9	7	9	6	9	5	5	5	9	5	9	9	9	5	1	7	5	5	4	2	4	4	4	4	4	4	4	4	3	3	3	3	1	1	4	3
2	6	5	3	4	8	3	7	6	6	5	3	3	6	3	6	6	6	7	7	5	5	7	4	3	4	3	4	3	3	3	2	2	3	3	2	1	4	3	3	3
2	1	1	9	2	2	8	2	3	3	2	7	8	6	8	4	8	5	9	5	8	5	8	3	1	2	1	1	1	1	1	1	1	1	1	2	2	1	1	1	2
2	2	5	6	3	1	7	4	1	1	5	6	7	5	6	3	1	1	6	4	6	4	6	2	1	1	1	1	1	2	3	3	1	1	1	3	3	4	1	1	2
2	7	6	5	5	8	5	6	4	8	5	5	5	6	5	6	5	4	5	4	6	6	7	2	4	3	2	2	3	2	1	1	2	4	4	2	2	4	3	2	6
2	4	3	5	3	9	6	4	4	4	4	4	4	7	7	7	5	5	5	3	5	5	5	4	1	3	3	4	2	1	2	4	1	2	1	4	4	1	1	3	1
2	7	5	5	5	6	5	6	6	6	5	5	4	5	5	6	5	5	5	5	4	4	6	2	3	3	3	3	3	2	2	2	3	3	2	3	3	2	2	3	4
2	8	7	5	7	9	4	7	7	8	4	6	6	6	6	8	6	5	2	2	5	3	5	3	3	3	2	3	3	2	2	1	1	3	1	1	2	1	3	3	4
2	5	6	3	2	6	7	1	1	1	1	7	4	4	7	1	1	1	5	5	5	5	5	2	1	3	1	2	2	2	2	2	2	2	2	2	1	2	3	2	1
2	7	7	5	6	6	7	5	5	7	7	5	5	5	5	5	5	5	5	7	7	5	8	2	1	1	4	4	3	3	2	3	2	4	3	4	2	2	3	3	5
2	1	1	3	1	7	8	2	7	2	1	4	5	1	3	6	5	7	9	9	6	5	7	3	1	3	2	2	3	2	3	2	4	1	1	2	3	4	3	2	4
2	5	6	4	6	8	6	6	7	4	6	3	6	6	5	8	8	8	4	5	3	3	3	2	3	4	4	3	3	4	4	4	4	3	3	2	3	3	3	3	5
2	7	5	5	5	6	6	5	4	7	4	6	5	8	5	5	5	7	5	5	7	5	5	4	3	2	4	2	3	4	4	3	2	3	1	1	2	2	3	3	3
2	2	2	5	6	1	5	6	4	4	5	5	5	5	5	2	5	1	5	1	5	5	5	3	2	1	1	3	2	2	3	2	3	1	1	3	4	3	1	3	4
2	7	7	5	6	6	7	5	5	7	7	5	5	5	5	5	5	5	5	7	7	5	8	2	1	1	4	4	3	3	2	3	2	4	3	4	2	2	3	3	5
2	1	1	5	1	1	3	1	1	1	3	7	5	3	1	1	1	1	3	1	5	5	5	3	1	1	2	2	1	3	4	4	1	1	1	3	4	1	1	1	2
2	5	5	5	5	1	5	5	3	3	5	5	5	5	5	1	2	1	4	4	6	5	5	2	1	1	1	2	2	1	2	1	2	2	2	1	2	3	2	2	3
2	8	7	2	5	9	5	7	6	8	6	3	3	6	4	7	6	7	3	6	2	4	6	3	3	4	3	4	3	3	2	3	2	3	3	3	2	3	2	3	4
2	6	6	3	5	7	4	6	6	6	7	4	4	5	4	1	1	1	1	1	6	2	6	3	1	1	2	3	1	2	2	2	2	1	1	2	2	3	2	2	3
2	5	8	3	4	9	4	7	8	9	5	4	6	9	3	8	6	2	5	8	3	5	5	4	3	4	2	3	3	4	2	2	4	3	2	2	2	3	3	4	4
2	2	5	5	5	8	5	7	5	3	5	5	5	5	5	4	6	3	5	2	4	7	6	1	2	3	2	2	1	1	1	1	2	2	1	1	1	1	2	2	3
2	2	4	5	6	4	5	7	5	2	3	6	5	5	4	4	3	2	5	1	5	4	6	2	2	1	1	2	1	2	2	1	2	3	2	1	2	1	2	1	4
2	2	2	5	4	3	6	6	3	3	4	5	5	6	6	3	1	1	3	1	5	4	6	2	1	1	1	1	1	1	1	1	3	4	4	1	2	3	3	2	5
2	7	7	2	8	5	5	8	8	9	5	5	5	5	5	2	9	1	1	7	5	5	5	3	3	2	4	2	4	1	3	2	3	2	1	1	2	2	3	3	5
2	8	6	5	7	9	5	7	5	9	6	6	5	7	8	4	4	4	7	4	5	5	5	3	4	4	2	2	4	4	3	3	2	4	1	3	4	2	3	3	4
2	3	3	5	5	8	5	3	3	1	2	5	5	4	5	7	3	1	7	1	5	7	5	2	3	4	1	1	1	1	1	2	1	4	3	1	2	2	3	2	5
2	3	7	5	7	9	5	3	1	1	1	5	7	5	7	1	1	1	7	9	5	3	7	3	3	4	2	3	2	3	2	2	3	3	3	3	3	4	3	2	4
2	8	5	3	7	9	3	3	1	4	2	4	4	8	4	9	4	9	5	5	2	8	5	2	3	4	2	2	3	2	2	1	4	3	4	1	1	3	2	3	5
2	9	5	1	9	9	1	9	5	9	1	5	1	9	5	1	1	1	1	1	5	5	9	4	2	4	4	4	4	4	4	4	2	2	1	3	2	2	2	4	3
2	6	7	7	5	8	8	6	8	6	6	7	6	9	8	6	6	8	8	9	8	6	9	4	1	2	2	3	1	4	4	2	2	1	1	4	3	1	2	3	7
2	4	9	5	9	9	5	9	5	4	3	5	5	5	8	5	4	1	1	1	5	4	5	4	1	4	3	3	1	3	4	3	3	1	1	4	4	3	2	4	1
2	3	7	5	4	7	6	6	5	3	5	5	5	7	5	7	6	3	5	4	6	5	6	2	2	3	2	3	2	2	2	2	2	3	1	1	2	1	3	3	2
2	9	9	5	9	9	7	9	3	3	5	5	5	5	5	9	2	1	7	1	7	5	6	2	1	4	1	3	2	2	1	3	3	1	1	1	2	1	1	2	1
2	7	5	5	8	8	5	8	9	3	5	5	5	9	5	9	9	4	7	3	5	5	5	2	2	3	4	3	2	2	2	2	4	3	2	2	2	2	3	2	4
2	7	4	4	5	9	6	6	4	7	4	5	5	6	4	3	2	3	3	3	6	3	7	4	4	4	3	2	3	3	2	2	2	2	3	1	1	1	3	4	4
2	7	5	5	4	1	5	4	4	7	1	6	5	6	4	3	2	1	1	1	6	2	5	1	2	1	2	3	3	2	2	1	2	3	3	2	2	1	3	3	3
2	2	2	5	2	1	6	2	5	1	3	6	5	5	5	3	1	1	5	4	6	2	6	1	1	1	1	1	1	1	2	1	1	2	3	1	2	3	3	1	3
2	4	6	7	5	2	7	8	5	2	3	6	5	5	5	8	4	3	5	3	7	5	5	3	1	1	1	1	3	3	1	2	3	1	1	3	3	2	1	2	1
2	4	4	7	4	4	6	4	5	4	2	7	5	5	5	2	2	1	5	5	5	5	5	2	1	2	1	1	1	2	3	1	1	1	1	1	3	2	4	2	1
2	2	5	6	1	5	7	1	9	1	5	3	8	1	6	7	7	9	5	9	5	7	5	3	4	3	3	1	3	1	1	1	2	4	4	2	2	3	3	4	7
2	3	9	9	9	9	9	9	9	3	9	9	9	9	9	9	9	2	9	9	9	9	9	4	2	4	4	4	2	4	4	4	4	2	2	4	4	1	1	4	1
2	1	5	5	5	1	7	1	5	1	5	6	6	1	6	1	5	5	5	5	6	5	6	2	1	2	1	1	1	1	2	1	1	1	1	1	3	3	3	2	4
2	7	7	5	5	8	7	6	4	6	4	5	5	6	6	4	5	3	6	5	4	4	6	2	2	4	2	4	3	3	4	3	3	3	4	3	4	4	3	2	6
2	5	3	5	5	1	5	5	5	5	2	5	5	5	5	3	2	3	5	1	5	5	5	3	2	1	1	2	1	3	2	1	1	1	1	1	2	3	3	2	2
2	6	4	5	4	1	5	5	5	6	5	5	5	6	5	4	3	4	5	5	5	5	5	3	1	1	1	3	2	2	1	2	2	1	1	2	3	1	3	1	3
2	9	9	5	3	5	5	5	5	9	5	5	5	1	5	5	5	5	5	7	7	5	5	4	4	2	1	2	4	4	2	1	4	4	1	1	1	3	2	2	3
2	1	1	5	1	1	5	5	7	1	1	5	5	1	5	1	1	1	5	1	5	5	5	2	3	1	1	2	1	2	1	1	1	4	4	1	2	3	4	2	5
2	4	2	5	1	4	5	5	3	3	4	6	4	3	5	2	2	1	6	5	6	5	5	2	1	1	1	2	1	2	1	1	1	1	1	1	1	1	2	1	1
2	6	6	5	5	4	6	6	5	6	6	5	5	6	5	6	5	4	6	4	5	4	6	2	1	3	2	3	2	3	2	2	3	2	3	2	3	2	3	2	4
2	1	5	5	3	4	6	4	5	1	5	6	6	4	5	5	5	4	5	3	5	5	5	2	3	2	2	2	2	2	2	2	2	3	2	1	2	2	3	2	5
2	7	6	3	5	9	2	6	5	3	5	6	5	7	3	6	7	3	6	2	3	6	3	3	4	4	4	4	3	2	2	2	3	4	4	2	2	3	4	4	6
2	6	5	5	5	6	6	4	3	3	4	5	5	5	5	5	4	4	5	5	4	5	5	2	1	2	1	1	1	2	1	1	1	1	1	1	1	4	1	2	3
2	2	8	5	8	3	5	7	5	1	1	5	5	5	5	3	1	1	5	1	5	2	5	3	1	4	2	1	2	3	1	1	1	2	1	1	2	3	1	2	2
2	4	6	5	6	7	5	8	7	9	6	5	5	6	5	6	5	6	5	5	5	4	5	2	1	3	2	1	3	2	1	2	2	1	3	2	3	2	2	2	3
2	3	7	5	3	9	5	9	7	2	7	5	7	5	5	9	3	5	5	5	3	7	5	3	2	4	4	2	2	2	4	4	4	4	4	3	2	3	4	3	4
2	7	6	8	8	8	5	4	4	6	4	4	7	6	8	4	3	2	6	8	6	4	7	3	2	3	2	3	2	3	3	1	2	3	1	2	2	3	3	2	3
2	4	4	5	5	7	5	7	7	7	5	4	5	4	6	6	3	3	4	2	5	5	5	2	2	3	1	1	3	1	1	1	2	2	3	1	1	1	3	2	4
2	4	7	5	5	8	7	8	8	4	3	5	5	7	5	6	4	3	5	3	5	5	6	3	1	4	3	2	1	3	3	4	3	1	1	3	3	3	2	4	4
2	4	5	5	5	7	5	5	4	6	3	5	5	6	5	3	4	3	5	5	5	4	5	2	2	3	1	2	2	1	1	1	2	3	2	1	2	3	3	1	3
2	3	5	5	5	7	5	6	4	3	5	5	5	6	5	6	4	4	5	5	5	4	5	2	2	3	2	3	2	2	3	2	2	3	2	2	2	2	3	2	3
2	5	5	5	5	8	5	6	5	5	5	5	5	6	5	6	5	5	5	5	5	5	5	1	3	2	2	1	1	2	1	3	1	4	1	3	2	1	2	3	3
2	1	1	5	1	1	5	1	1	1	1	5	5	5	5	1	1	1	5	3	5	2	5	3	1	1	1	2	1	3	1	1	1	1	1	2	1	2	4	1	1
2	8	7	6	6	9	7	7	5	6	5	3	3	9	7	9	9	5	5	5	5	4	8	3	1	4	3	3	3	3	3	3	3	2	2	3	2	3	2	3	2
2	3	1	7	6	8	8	3	8	2	5	4	6	5	7	8	6	7	5	7	4	6	5	4	3	4	3	3	3	2	3	4	2	2	3	3	1	4	2	3	3
2	9	9	5	8	9	6	8	5	9	5	6	6	4	7	6	3	4	5	8	4	7	7	4	1	4	4	3	3	3	4	4	3	1	1	3	3	3	2	3	2
2	5	6	4	5	7	5	3	6	5	9	3	6	2	3	5	3	1	5	5	5	5	5	2	2	1	1	1	2	2	1	3	1	3	3	2	1	4	2	1	4
2	1	1	5	3	1	7	5	2	1	5	6	6	3	7	6	6	7	5	5	6	3	7	4	1	1	2	2	1	3	2	1	2	1	1	1	1	1	2	1	1
2	3	3	5	1	1	6	4	1	1	1	5	7	5	4	1	1	1	4	5	4	1	6	3	4	1	2	2	2	2	1	1	1	4	4	1	1	4	3	1	6
2	1	1	7	9	9	5	2	1	1	5	5	8	3	5	5	1	1	5	2	5	3	5	3	1	4	4	3	1	2	4	4	1	1	1	3	3	2	3	3	3
2	7	1	6	2	6	7	3	1	1	3	5	5	4	5	5	2	3	6	2	3	2	5	2	1	2	1	2	1	2	1	1	1	1	1	1	3	2	1	2	2
2	5	9	5	9	9	5	9	4	9	5	5	5	9	5	9	9	5	5	9	5	9	5	4	1	4	1	3	2	1	1	1	4	1	1	1	2	1	4	1	1
2	7	5	5	5	3	5	5	4	7	1	6	6	5	5	1	2	2	5	2	5	3	5	3	2	2	2	3	2	3	2	2	2	2	1	2	2	1	1	2	2
2	7	5	3	4	9	5	7	9	7	7	1	6	5	4	9	7	9	5	1	4	9	7	4	2	4	4	3	4	4	3	4	4	1	2	3	4	3	2	3	3
2	2	3	5	2	2	5	5	5	1	5	7	6	7	6	2	1	1	6	1	6	2	6	4	1	1	1	3	1	4	2	2	3	2	2	1	2	1	3	2	3
2	6	6	5	4	8	6	5	5	6	4	5	5	5	5	4	4	4	6	4	5	4	5	3	4	4	2	4	2	3	4	4	2	4	4	3	2	4	3	3	6
2	8	5	2	5	9	2	1	7	7	5	5	5	7	5	6	6	7	1	9	1	8	3	3	4	4	4	3	4	2	1	2	4	4	4	3	3	4	3	4	6
2	1	5	5	5	2	5	3	1	1	1	6	5	4	3	1	3	1	5	1	5	1	5	2	4	2	1	1	1	1	1	1	1	3	2	1	1	2	4	1	4
2	5	5	3	6	8	6	7	8	8	2	8	5	7	5	3	5	3	7	2	3	2	8	3	3	3	2	3	2	3	2	1	1	3	3	1	2	3	3	2	5
2	2	2	8	7	9	7	2	3	1	2	8	8	5	7	5	2	2	5	1	5	5	8	3	1	4	1	3	1	3	2	2	3	1	1	3	3	1	1	2	1
2	3	4	5	5	6	5	3	1	2	5	5	7	1	5	4	3	3	3	5	4	2	5	4	2	2	2	3	2	2	1	2	1	1	1	1	2	2	2	1	3
2	6	5	3	5	6	5	5	5	5	1	5	5	7	5	5	1	5	5	5	5	5	5	3	4	2	1	1	2	3	1	2	2	4	4	2	2	4	4	2	5
2	7	6	5	4	2	6	8	5	7	1	5	5	4	3	3	2	3	3	1	3	3	7	3	3	2	2	3	3	1	1	2	3	3	3	1	2	4	4	3	6
2	9	9	5	7	6	5	8	9	7	2	3	5	9	2	2	1	1	4	1	8	2	7	2	1	1	2	2	1	3	2	1	1	2	1	2	2	2	2	2	1
2	3	3	3	3	5	3	3	1	3	5	4	6	2	6	2	1	1	6	1	3	1	5	2	1	2	1	3	2	2	2	1	1	1	1	1	1	1	1	2	2
2	4	2	7	6	8	6	3	5	2	7	5	5	9	5	5	2	1	5	2	7	2	7	2	3	3	2	2	2	3	3	1	3	3	3	3	1	4	4	3	4
2	3	1	5	4	8	6	4	5	3	4	5	6	4	6	3	1	4	5	4	5	5	5	1	1	3	1	1	1	1	2	1	1	1	1	1	2	3	3	2	4
2	6	6	5	4	8	6	5	5	6	4	5	5	5	5	4	4	4	6	4	5	4	5	3	4	4	2	4	2	3	4	4	2	4	4	3	2	4	3	3	6
2	1	5	5	5	2	5	3	1	1	1	6	5	4	3	1	3	1	5	1	5	1	5	2	4	2	1	1	1	1	1	1	1	3	2	1	1	2	4	1	4
2	1	1	9	5	1	9	5	5	1	5	9	9	5	5	1	1	1	5	1	8	1	8	1	1	1	1	3	1	2	2	2	2	1	1	2	1	2	4	2	5
2	3	5	5	6	9	5	4	5	7	5	6	5	8	5	8	5	3	1	7	6	7	6	3	1	4	2	2	2	3	2	2	3	1	1	2	2	3	2	3	1
2	3	3	3	3	5	3	3	1	3	5	4	6	2	6	2	1	1	6	1	3	1	5	2	1	2	1	3	2	2	2	1	1	1	1	1	1	1	1	2	2
2	6	5	4	7	9	6	7	3	6	3	4	6	8	5	7	9	4	3	7	5	6	5	4	1	3	3	2	3	3	2	3	3	2	1	3	3	1	1	4	2
2	3	3	5	4	6	5	4	3	3	3	5	5	6	5	3	3	3	4	4	5	4	5	2	1	3	2	2	2	2	2	2	3	1	1	2	2	2	3	2	4
2	4	5	5	5	6	6	4	6	4	3	5	5	4	6	4	4	1	6	3	6	5	6	3	2	3	2	3	2	3	3	3	2	2	2	3	3	2	2	3	3
2	7	2	5	2	9	6	7	2	1	4	5	6	6	5	7	8	3	7	8	5	7	7	2	1	4	2	2	4	2	1	1	2	2	2	1	1	4	2	2	5
2	9	9	1	9	9	1	9	9	9	5	1	1	9	1	9	5	5	9	1	1	1	1	4	4	4	4	4	4	4	4	4	1	4	1	4	4	3	1	3	6
2	9	9	1	9	9	1	9	9	9	5	1	1	9	1	9	5	5	9	1	1	1	1	4	4	4	4	4	4	4	4	4	1	4	1	4	4	3	1	3	6
2	1	5	5	1	1	5	5	3	2	1	5	5	3	5	3	1	5	6	1	6	5	5	3	4	1	1	3	1	4	1	1	1	4	2	1	2	1	3	2	1
2	7	7	5	7	9	5	8	7	9	5	5	5	4	5	8	3	3	5	9	5	5	5	2	3	3	2	2	3	2	2	2	2	3	3	1	2	2	2	3	4
2	7	7	5	3	3	6	7	5	7	4	5	6	7	5	7	3	1	5	5	5	4	7	3	1	2	3	3	3	3	3	3	3	4	2	1	2	2	3	3	3
2	7	5	3	3	9	5	9	7	7	6	1	3	3	3	9	9	9	5	9	5	2	5	3	4	4	3	3	4	4	3	3	3	2	2	2	3	3	3	3	5
2	8	3	5	3	7	6	3	3	7	2	3	5	3	5	3	3	7	4	3	5	5	5	2	2	3	3	3	4	3	2	2	2	3	4	1	1	3	3	3	6
2	9	9	5	9	9	3	9	9	9	2	5	5	9	5	1	9	1	1	9	1	5	5	3	1	4	2	4	4	3	2	2	4	2	1	2	2	1	3	4	1
2	5	5	5	3	7	3	1	1	8	5	5	5	3	5	1	5	5	5	1	2	5	5	1	4	2	1	1	2	3	1	1	1	4	3	1	2	3	4	1	6
2	7	2	5	1	9	6	9	5	6	2	2	2	9	5	3	2	1	7	7	8	9	7	4	2	4	4	3	4	3	2	3	4	1	1	4	2	4	2	4	2
2	5	9	5	9	9	5	9	4	9	5	5	5	9	5	9	9	5	5	9	5	9	5	4	1	4	1	3	2	1	1	1	4	1	1	1	2	1	4	1	1
2	5	7	6	4	9	5	7	6	2	5	4	1	9	2	1	1	1	6	1	6	1	7	2	1	4	2	2	2	3	3	2	2	2	1	3	2	3	2	3	2
2	7	7	4	8	9	3	9	9	9	6	4	5	9	5	9	5	1	3	9	7	6	5	1	3	4	2	4	3	2	3	2	2	3	4	3	2	4	2	2	2
2	3	5	5	3	8	5	5	5	3	5	5	5	5	5	5	2	2	5	5	4	5	5	2	1	3	1	2	1	3	2	1	1	1	1	1	2	2	2	1	1
2	5	9	5	8	8	7	5	9	5	5	3	5	6	5	5	5	5	5	1	5	5	5	3	1	2	1	2	2	2	3	3	2	1	1	3	4	2	2	2	1
2	1	5	7	5	6	9	5	5	1	3	8	9	4	9	5	4	2	7	1	9	3	7	3	1	3	3	3	1	1	4	2	2	3	1	4	3	2	1	1	1
2	9	9	5	4	9	5	9	9	9	1	7	7	7	8	8	1	1	3	7	5	1	7	4	1	4	3	4	3	3	3	3	3	2	2	3	2	3	2	4	2
2	5	7	5	5	3	5	7	7	4	5	5	5	5	6	2	5	5	5	5	5	7	6	2	2	1	3	3	2	4	2	2	2	4	3	2	4	1	2	2	3
2	3	3	5	4	7	5	4	5	2	4	7	7	6	5	4	4	3	6	4	5	4	6	3	1	3	4	4	2	4	2	1	2	1	1	2	2	1	2	2	4
2	6	4	3	1	9	6	9	9	7	4	1	6	7	4	1	1	1	1	1	8	1	9	3	2	1	1	2	1	2	2	1	1	1	1	1	2	2	3	1	3
2	6	4	6	5	3	6	4	5	2	5	5	5	5	7	4	4	2	2	5	6	4	7	1	2	1	1	1	1	1	1	1	1	2	2	1	1	3	2	1	4
2	8	8	6	8	8	7	8	5	8	3	5	5	8	6	8	2	1	5	8	2	4	5	1	1	4	2	3	4	2	3	2	4	1	2	4	4	4	1	3	2
2	1	4	5	2	1	6	6	6	1	3	5	5	6	5	1	1	2	4	5	5	3	6	3	1	2	1	3	1	3	1	1	2	1	1	1	2	1	1	1	2
2	8	7	5	5	5	5	6	3	3	5	5	5	5	5	5	6	5	7	5	5	5	5	2	2	2	4	3	4	3	4	3	2	3	4	3	1	4	3	3	6
2	5	5	5	6	7	7	6	5	7	5	5	5	8	5	5	6	7	5	5	5	6	5	3	1	2	2	1	2	4	3	1	1	1	1	1	2	2	2	1	3
2	5	5	5	5	7	6	5	5	4	5	6	5	6	5	7	5	3	5	5	6	4	5	1	1	3	2	2	2	1	1	1	2	3	1	1	1	1	1	2	3
2	1	1	6	5	1	8	5	5	1	1	7	8	5	6	1	5	1	5	5	7	5	7	2	3	1	1	2	1	2	1	2	2	3	2	1	2	1	3	2	4
2	9	9	5	9	6	9	9	1	9	1	5	5	7	5	9	9	1	1	9	4	9	7	3	2	3	4	3	4	3	4	4	3	3	1	3	3	1	3	3	3
2	7	3	5	3	8	5	6	3	7	3	5	5	5	5	3	3	1	5	6	5	5	5	2	3	4	1	2	3	2	1	1	1	4	4	1	1	3	4	1	5
2	3	1	5	3	1	6	3	5	1	1	6	6	5	6	1	2	3	5	1	5	3	5	2	2	2	1	2	1	4	2	1	3	2	2	1	2	2	2	2	4
2	7	5	4	5	8	4	7	6	7	4	5	5	6	5	7	6	5	5	5	5	5	6	3	2	4	2	3	3	3	2	2	2	2	2	2	2	3	3	3	2
2	7	7	5	7	7	5	6	4	7	5	5	5	7	5	6	6	8	5	5	5	7	6	2	1	3	2	2	3	2	1	1	3	3	3	1	2	3	4	1	4
2	9	9	5	9	9	5	9	9	9	9	4	4	9	5	9	9	9	6	7	5	7	5	3	2	4	2	3	4	3	2	2	4	2	3	2	2	1	2	3	4
2	7	5	5	5	7	4	6	3	7	5	5	5	7	5	8	3	2	5	8	3	5	5	3	1	4	2	2	3	2	2	1	2	1	3	1	2	4	4	3	5
2	5	5	5	5	4	6	5	4	3	6	7	7	3	6	5	5	5	5	5	3	5	7	2	1	1	3	1	2	2	1	1	1	3	3	2	3	4	2	3	5
2	6	5	5	5	6	5	5	6	4	5	5	5	6	5	5	5	5	5	5	3	5	4	3	3	2	3	3	3	2	3	4	1	4	2	2	2	4	2	3	4
2	1	1	5	1	8	7	1	2	1	1	6	5	6	5	7	8	7	6	1	9	5	7	3	2	4	1	1	2	3	3	1	1	2	2	1	2	3	3	2	4
2	8	4	5	3	6	5	6	7	4	1	3	5	7	2	1	1	1	1	3	1	1	1	4	1	1	2	3	3	4	4	3	2	2	1	3	2	2	2	4	1
2	5	5	5	3	6	5	4	2	2	4	5	6	4	5	3	3	3	4	4	6	3	5	3	1	2	2	3	2	3	2	1	2	3	2	1	1	4	3	2	3
2	7	3	6	4	7	8	5	4	5	3	6	5	5	7	6	6	4	5	5	4	5	5	2	2	4	2	3	3	2	4	2	3	1	1	4	4	2	4	3	3
2	3	3	6	3	1	7	8	3	5	2	8	7	4	6	2	2	2	5	2	5	3	6	2	1	1	2	3	2	3	1	2	1	1	1	2	2	2	3	1	3
2	9	9	5	9	9	5	9	9	9	5	5	5	9	6	9	7	5	5	9	4	7	9	4	2	4	4	4	4	4	3	2	4	2	1	3	2	1	2	2	4
2	3	7	6	5	6	7	4	4	5	5	6	5	7	6	4	4	4	5	3	7	4	6	3	3	2	3	3	2	4	2	2	3	3	3	3	3	2	3	4	4
2	6	4	5	4	2	5	7	5	4	3	5	5	5	6	5	5	2	5	5	5	5	5	3	2	2	1	2	2	3	2	3	2	2	2	1	3	1	2	2	3
2	5	5	5	5	5	5	5	5	5	5	6	5	5	5	1	5	3	5	5	5	5	4	2	1	1	1	1	1	1	2	1	1	3	1	2	2	1	3	1	4
2	6	5	5	5	6	5	5	5	6	5	5	5	5	5	5	5	3	5	5	5	5	5	3	2	3	1	2	2	2	3	2	1	2	2	3	2	2	3	3	3
2	7	8	5	8	9	5	9	7	5	5	6	5	5	6	7	8	5	5	1	5	5	5	3	2	3	2	3	3	2	2	1	1	2	3	1	3	3	3	3	2
2	3	7	5	5	6	5	5	5	3	4	7	5	5	5	4	3	2	2	9	5	5	5	2	2	2	2	2	1	2	1	3	2	2	3	1	2	2	2	2	4
2	6	4	5	4	2	5	7	5	4	3	5	5	5	6	5	5	2	5	5	5	5	5	3	2	2	1	2	2	3	2	3	2	2	2	1	3	1	2	2	3
2	1	4	5	3	6	5	5	2	1	5	5	5	3	5	6	2	1	3	1	5	4	5	1	1	3	1	2	1	2	1	2	1	1	1	2	1	4	3	3	3
2	9	7	5	9	9	5	9	2	6	1	9	5	5	5	9	7	2	5	5	1	5	5	2	2	4	3	2	4	3	2	2	1	2	2	2	2	3	3	3	3
2	1	5	5	6	6	6	1	1	1	5	5	5	7	6	6	2	1	8	1	5	1	5	4	1	3	1	1	1	3	2	1	1	1	1	2	1	2	1	1	3
2	1	2	8	1	5	9	3	9	4	1	5	5	1	5	1	1	1	1	1	7	1	7	1	1	1	1	1	1	2	1	1	1	1	1	1	1	2	1	1	7
2	7	7	2	8	9	5	8	5	8	5	3	5	5	5	9	5	6	7	3	5	7	5	2	1	4	2	3	3	3	1	2	2	1	1	2	2	2	2	2	2
2	2	1	6	1	1	8	2	5	2	2	8	5	5	5	7	6	3	4	7	2	4	5	2	1	4	4	4	4	3	2	1	3	3	4	2	3	4	3	3	6
2	1	9	5	9	9	5	9	9	9	9	5	5	9	5	1	1	1	9	1	5	1	5	4	1	4	4	2	1	4	4	4	1	1	1	2	3	1	1	3	1

## Sheet: EMAQ TFEQ Sample 3
Sample	EMAQ1	EMAQ2	EMAQ3	EMAQ4	EMAQ5	EMAQ6	EMAQ7	EMAQ8	EMAQ9	EMAQ10	EMAQ11	EMAQ12	EMAQ13	EMAQ14	EMAQ15	EMAQ16	EMAQ17	EMAQ18	EMAQ19	EMAQ20	EMAQ21	EMAQ22	TFEQ1	TFEQ2	TFEQ3	TFEQ4	TFEQ5	TFEQ6	TFEQ7	TFEQ8	TFEQ9	TFEQ10	TFEQ11	TFEQ12	TFEQ13	TFEQ14	TFEQ15	TFEQ16	TFEQ17	TFEQ18
3	6	6	5	6	7	5	6	4	6	5	4	5	6	5	6	6	5	4	6	3	5	4	2	4	1	1	2	2	2	2	1	1	4	4	1	2	4	3	2	7
3	4	5	5	5	6	5	4	5	4	5	5	5	5	5	5	5	5	5	4	5	5	5	2	2	2	1	1	1	1	1	1	1	3	3	1	2	2	3	2	4
3	1	4	7	4	3	7	4	3	4	3	7	7	3	8	3	2	2	8	2	5	3	8	3	1	1	3	2	2	3	2	2	2	1	1	2	2	1	3	2	1
3	5	5	5	5	5	5	5	5	5	5	5	5	4	5	5	5	5	5	5	4	4	5	4	1	2	2	2	2	2	2	1	1	1	1	2	2	1	2	2	1
3	8	8	1	6	7	1	7	1	7	1	5	5	5	3	7	2	2	5	7	3	5	5	3	3	2	2	1	3	3	2	2	3	3	1	2	2	2	3	2	2
3	4	1	5	1	6	8	5	3	5	5	6	7	5	6	5	3	1	5	5	8	4	8	2	1	3	3	3	1	2	3	3	1	2	2	2	3	2	2	2	2
3	6	6	6	6	6	7	5	5	6	4	9	7	9	6	7	7	5	9	3	5	5	5	1	2	4	4	4	3	3	4	2	3	4	3	3	1	3	3	3	4
3	1	4	7	4	3	7	4	3	4	3	7	7	3	8	3	2	2	8	2	5	3	8	3	1	1	3	2	2	3	2	2	2	1	1	2	2	1	3	2	1
3	1	1	2	1	6	5	1	5	2	1	6	6	5	5	1	1	1	5	1	6	5	5	2	3	3	2	2	1	2	2	1	1	3	1	2	2	2	3	2	6
3	6	6	5	6	9	4	5	7	7	6	3	4	4	4	3	3	3	6	3	6	3	6	3	3	1	1	1	1	3	2	2	2	2	1	1	3	2	3	2	2
3	5	5	5	5	5	5	5	5	5	5	5	5	5	5	5	5	5	5	5	2	5	5	1	1	1	1	1	1	1	1	1	1	1	1	1	1	3	2	1	1
3	7	6	5	5	6	5	6	5	6	5	5	5	7	5	6	6	6	5	6	5	6	5	2	1	3	3	3	3	2	2	2	3	3	3	3	2	2	3	3	6
3	1	2	8	2	6	8	2	5	2	2	6	8	2	8	3	5	3	3	3	3	5	5	2	3	3	4	3	2	2	2	2	2	3	3	2	2	3	3	2	5
3	2	3	5	6	7	6	3	3	3	5	6	5	2	7	3	5	2	3	5	6	2	8	3	3	3	2	2	2	3	2	3	2	2	2	3	2	1	3	3	4
3	9	9	5	8	9	5	3	2	4	4	8	8	5	7	8	3	3	5	8	5	3	5	3	1	3	2	2	2	3	2	2	2	3	2	2	2	2	3	3	2
3	7	5	5	5	5	5	5	5	5	5	6	5	7	5	5	5	5	5	5	5	5	5	3	2	1	2	3	2	3	3	3	3	2	1	2	1	1	2	1	1
3	3	2	5	5	7	5	7	5	2	5	7	5	5	5	3	3	5	5	3	7	5	5	2	2	3	3	3	2	2	1	1	1	3	1	1	2	3	3	3	6
3	3	5	5	5	6	5	5	4	3	5	5	5	5	5	4	4	5	5	5	6	4	5	2	1	3	1	1	1	3	1	1	1	1	1	1	2	1	2	2	3
3	5	7	5	5	9	6	9	3	4	5	5	5	5	6	4	3	5	5	2	5	7	6	3	3	4	3	4	2	4	1	3	3	3	4	3	2	3	2	4	5
3	2	2	5	5	8	5	3	3	3	3	5	7	3	6	5	3	2	5	3	7	3	5	2	1	3	2	2	1	3	1	2	1	3	3	1	1	3	4	1	5
3	6	4	5	6	8	5	7	7	3	4	5	5	4	5	4	4	2	3	8	4	4	5	2	3	3	3	4	3	3	2	2	2	2	3	2	1	4	3	4	6
3	9	9	6	9	9	9	5	5	9	5	7	5	9	5	1	9	5	5	9	1	9	7	4	1	4	3	3	4	3	4	1	3	1	1	2	1	4	3	3	1
3	3	4	5	4	3	6	5	5	3	5	5	6	5	5	4	5	1	4	3	5	4	5	3	3	1	2	3	1	3	2	2	2	1	2	2	2	2	3	1	3
3	7	7	2	5	8	6	8	5	7	3	5	6	3	6	4	5	2	5	5	5	5	5	2	3	4	2	2	3	1	2	1	1	3	3	2	2	3	4	3	5
3	5	5	5	5	5	5	5	7	5	5	5	5	5	5	5	5	5	5	5	5	5	5	1	2	1	2	1	1	1	1	1	1	3	1	2	1	1	1	2	1
3	4	6	5	6	8	5	5	4	6	5	5	5	5	4	3	4	4	5	7	5	5	7	2	3	3	1	3	2	1	1	1	3	3	2	1	2	3	2	1	4
3	5	5	6	5	6	6	5	6	5	5	6	5	5	6	3	4	4	4	4	6	5	6	1	3	2	1	2	1	2	2	1	1	3	2	2	2	2	3	2	4
3	5	5	6	5	6	6	5	6	5	5	6	5	5	6	3	4	4	4	4	6	5	6	1	3	2	1	2	1	2	2	1	1	3	2	2	2	2	3	2	4
3	4	4	7	6	8	8	5	5	3	5	5	5	4	7	5	4	5	6	5	5	3	5	4	1	3	4	4	2	4	4	4	3	1	1	3	3	1	4	4	2
3	5	5	3	2	8	3	2	1	1	1	3	3	2	4	1	1	1	1	1	1	1	2	1	1	3	1	1	1	1	1	1	1	4	3	1	2	4	4	2	6
3	5	6	5	7	8	5	7	5	5	5	5	5	5	7	8	5	9	5	4	5	4	5	3	3	3	3	3	2	2	3	3	2	2	2	3	3	3	3	3	5
3	5	5	5	5	5	5	5	5	5	5	5	5	5	5	5	5	5	5	5	5	5	5	2	1	2	2	3	1	2	1	1	2	1	1	2	3	3	4	2	2
3	3	3	5	2	3	7	3	5	2	2	5	5	5	5	2	1	2	2	2	5	3	5	2	1	2	2	2	2	2	2	2	2	1	1	1	1	1	1	2	1
3	3	3	5	5	4	5	4	5	4	5	5	5	5	5	4	4	4	5	5	4	5	5	2	1	1	2	2	1	2	2	1	1	3	3	1	1	1	3	2	1
3	5	7	5	5	6	5	6	4	4	5	5	5	5	5	5	3	3	3	3	5	4	6	3	3	2	3	4	3	3	3	2	2	3	1	2	1	3	3	2	5
3	8	8	5	8	8	8	8	8	8	5	5	5	5	8	8	5	2	5	4	4	5	5	2	4	4	2	4	4	2	2	2	2	4	4	3	3	4	4	2	7
3	5	5	1	1	6	5	1	1	1	1	1	1	5	1	1	1	1	5	1	6	1	5	3	3	2	1	2	2	3	1	1	1	2	2	2	2	3	4	1	6
3	5	5	5	5	5	5	5	5	5	5	5	5	5	5	3	3	3	3	3	3	5	5	1	1	2	1	3	1	1	1	1	1	1	1	1	1	1	2	1	1
3	6	5	5	5	6	5	6	6	6	5	4	5	5	5	3	2	1	5	8	5	7	5	2	3	3	1	2	3	2	1	2	2	3	2	2	2	3	3	1	4
3	6	5	5	5	6	5	6	6	6	5	4	5	5	5	3	2	1	5	8	5	7	5	2	3	3	1	2	3	2	1	2	2	3	2	2	2	3	3	1	4
3	6	7	5	6	8	5	7	7	5	5	4	6	5	6	7	7	7	5	2	5	8	5	4	2	4	3	2	3	2	3	1	3	4	4	1	1	3	3	3	5
3	7	7	5	7	9	5	5	5	7	5	5	5	4	5	1	1	1	5	3	5	1	9	4	1	4	4	4	1	1	4	2	1	1	1	3	4	2	2	3	1
3	7	5	4	5	7	5	6	3	4	3	5	5	6	5	2	2	4	4	7	4	4	6	1	2	2	2	2	3	2	2	1	3	3	2	1	2	3	3	2	4
3	8	8	5	9	6	6	2	3	6	5	5	5	5	7	2	1	3	8	3	7	2	8	3	1	2	3	3	2	3	2	3	3	1	2	1	2	2	2	2	4
3	1	1	6	1	1	6	1	1	1	1	5	6	5	6	1	1	1	8	1	6	1	7	2	1	1	2	2	2	1	3	2	1	1	2	1	2	3	2	2	1
3	3	3	7	3	6	8	2	5	2	2	2	7	2	7	5	5	3	4	3	7	3	5	2	1	2	1	3	2	3	1	2	1	3	3	2	2	2	2	2	5
3	7	7	5	4	9	5	4	5	8	5	7	5	5	6	8	2	3	5	3	5	5	5	3	2	4	3	3	4	3	1	1	1	2	2	1	2	3	2	3	3
3	2	6	9	6	1	9	2	2	1	5	7	8	2	8	3	2	2	1	9	7	1	9	2	4	2	4	1	1	1	4	4	2	4	4	2	3	4	4	2	6
3	2	3	5	3	7	6	7	6	3	5	5	5	6	5	5	3	2	5	3	5	2	6	3	2	3	2	2	2	3	3	1	3	2	1	2	3	3	2	3	3
3	3	7	5	6	6	5	8	6	5	6	4	1	1	3	7	7	3	5	7	5	7	7	4	4	4	4	4	4	4	4	4	4	4	4	4	4	4	2	4	8
3	7	5	5	5	9	3	7	7	8	7	1	5	7	4	5	3	3	1	1	1	5	7	3	1	3	3	3	2	3	3	4	4	1	1	2	2	3	1	2	3
3	7	7	5	7	9	5	8	7	7	6	3	5	2	2	8	5	5	5	5	6	6	5	3	3	4	3	2	3	3	2	2	3	3	3	2	2	4	2	3	3
3	7	5	5	6	7	7	6	3	4	5	5	5	4	5	3	4	3	7	4	5	4	6	4	2	3	2	3	1	2	3	1	2	1	1	2	2	1	3	2	1
3	2	2	5	6	8	5	4	4	2	3	5	5	5	5	3	6	2	5	3	5	4	6	3	3	4	2	2	1	2	2	2	2	3	2	2	2	3	4	2	6
3	9	7	2	5	9	5	7	5	9	6	3	5	2	5	9	7	5	7	5	5	7	5	2	2	4	2	3	3	2	2	3	2	2	1	2	2	2	3	2	3
3	3	5	5	5	3	7	4	3	4	5	5	5	5	6	4	4	3	7	5	5	4	5	1	1	1	1	1	1	1	1	1	1	1	1	1	2	1	3	1	1
3	4	5	5	5	5	5	5	4	4	5	6	5	6	5	4	5	5	6	5	5	4	5	4	1	1	4	4	2	3	4	4	2	1	1	4	4	3	1	1	2
3	1	1	5	3	1	6	4	5	1	5	7	7	5	5	1	1	1	5	1	5	2	6	2	2	1	1	2	1	1	1	1	1	2	2	1	1	3	2	1	2
3	1	1	7	1	5	8	5	9	1	1	5	5	9	5	5	5	1	5	5	5	1	5	3	1	3	1	1	2	2	1	3	1	1	1	4	1	1	1	1	1
3	8	8	7	5	7	7	9	2	8	2	5	5	2	8	2	2	1	5	1	5	8	5	3	2	3	2	4	2	3	2	2	2	2	2	2	1	3	2	3	4
3	7	7	5	3	9	7	7	6	7	1	7	5	4	5	6	1	1	5	5	5	3	5	3	4	3	2	2	3	3	1	1	2	4	4	2	2	4	4	2	5
3	3	4	5	4	6	5	4	5	1	2	5	5	5	5	3	2	1	5	1	4	4	5	2	1	2	2	1	1	2	1	1	1	1	1	1	2	4	4	2	4
3	8	8	7	5	7	7	9	2	8	2	5	5	2	8	2	2	1	5	1	5	8	5	3	2	3	2	4	2	3	2	2	2	2	2	2	1	3	2	3	4
3	8	8	7	5	7	7	9	2	8	2	5	5	2	8	2	2	1	5	1	5	8	5	3	2	3	2	4	2	3	2	2	2	2	2	2	1	3	2	3	4
3	8	8	7	5	7	7	9	2	8	2	5	5	2	8	2	2	1	5	1	5	8	5	3	2	3	2	4	2	3	2	2	2	2	2	2	1	3	2	3	4
3	9	9	5	8	6	5	8	6	8	6	5	5	4	5	2	5	1	6	5	3	7	2	3	1	3	1	3	3	2	3	1	3	2	2	1	2	3	3	2	3
3	5	5	5	5	7	5	5	4	5	5	5	5	5	5	5	5	5	5	5	5	5	6	2	1	4	4	2	2	2	4	2	1	2	1	2	1	4	3	3	2
3	2	5	5	5	8	5	8	8	3	5	5	5	3	5	8	7	2	5	7	5	3	5	2	2	4	2	2	2	2	2	2	3	2	1	1	3	2	2	3	4
3	1	1	5	5	9	5	8	3	1	5	5	5	5	5	5	5	1	5	1	5	7	5	1	1	2	1	1	1	1	1	1	1	1	2	1	1	4	2	1	1
3	8	8	7	5	7	7	9	2	8	2	5	5	2	8	2	2	1	5	1	5	8	5	3	2	3	2	4	2	3	2	2	2	2	2	2	1	3	2	3	4
3	8	6	4	2	8	6	6	3	3	2	5	4	3	5	5	5	1	9	5	5	1	7	3	4	3	2	3	3	2	2	1	1	3	4	3	2	3	3	3	7
3	7	7	7	4	6	7	6	7	6	5	6	6	7	6	6	5	5	5	4	6	5	6	1	2	3	2	2	2	1	1	1	2	3	3	2	2	1	2	1	2
3	8	5	5	7	9	6	9	5	4	3	7	5	4	6	4	4	4	5	7	4	7	5	2	4	3	2	3	4	2	1	1	1	4	4	2	2	4	3	2	6
3	5	5	5	5	5	5	5	7	5	5	5	5	5	5	5	6	3	5	5	6	5	5	1	2	1	1	1	1	1	1	1	1	3	1	1	1	2	4	1	6
3	9	9	5	7	9	6	9	9	9	1	5	5	8	5	4	5	3	9	9	8	5	5	3	3	3	3	3	4	3	2	3	2	3	2	3	2	3	3	3	3
3	7	7	4	4	9	7	7	9	9	8	4	5	5	5	7	9	8	5	7	8	9	6	3	2	3	4	4	4	4	4	4	3	2	3	3	3	3	2	3	5
3	5	5	5	5	5	5	5	5	5	5	5	5	5	5	5	5	5	5	1	5	5	5	3	1	1	2	2	1	3	3	3	1	1	1	2	1	1	1	2	1
3	2	2	7	5	2	6	7	7	2	2	5	5	5	5	2	2	2	4	4	6	2	7	2	1	1	1	2	2	2	2	1	2	1	1	1	2	3	1	1	5
3	3	3	5	5	7	5	3	5	3	5	5	5	5	5	3	1	3	5	5	7	4	5	4	4	4	1	4	1	3	1	1	1	4	3	1	1	4	3	1	2
3	7	6	3	7	9	3	3	5	4	4	4	5	5	6	7	8	8	5	5	4	8	5	3	3	4	3	3	3	3	4	4	2	3	3	3	3	2	2	3	4
3	4	3	8	3	4	7	4	3	3	4	6	5	3	6	6	7	4	7	6	5	8	6	3	3	2	2	2	2	2	2	2	2	2	3	3	1	1	3	1	3
3	5	5	5	5	7	6	5	5	5	4	6	5	7	5	4	4	1	5	1	6	2	5	3	1	3	1	3	2	3	2	2	2	1	1	2	2	2	2	2	2
3	9	9	5	7	9	8	4	6	8	3	7	5	9	5	7	7	9	9	9	9	9	7	4	4	4	3	4	4	4	4	4	4	3	3	4	4	3	2	4	3
3	5	5	5	5	7	5	5	5	5	5	5	5	5	5	5	4	3	5	5	5	5	5	3	2	3	2	2	1	3	2	2	2	3	1	2	2	3	3	1	3
3	8	5	5	3	9	6	8	1	9	3	5	5	8	6	9	4	3	3	2	5	3	6	2	2	4	3	3	2	1	3	1	3	2	2	1	2	2	3	2	5
3	5	5	5	1	1	5	6	6	1	5	5	5	5	5	1	1	1	9	1	5	5	5	2	4	1	2	2	1	2	2	2	1	3	2	3	3	3	4	2	4
3	9	9	5	5	9	5	5	4	8	5	5	5	9	5	6	1	3	5	1	5	1	9	1	1	4	1	2	3	2	2	1	4	1	4	2	3	4	2	1	7
3	6	3	5	3	6	6	6	6	6	5	6	6	3	5	5	3	3	5	4	5	5	6	2	4	2	2	1	3	3	3	4	2	4	1	2	1	4	4	2	4
3	5	7	5	9	9	5	7	1	1	1	5	5	8	1	7	8	1	5	1	1	8	1	3	3	4	1	3	1	2	2	2	3	4	2	2	2	3	4	2	5
3	7	5	5	5	8	5	7	6	6	5	5	5	3	5	6	5	3	3	2	5	5	5	4	2	4	3	3	2	3	2	2	1	3	3	3	2	3	3	3	4
3	5	5	5	3	1	6	5	3	1	3	5	5	5	5	3	2	1	5	5	5	5	5	2	1	1	1	2	1	3	2	1	1	2	2	2	1	4	4	2	4
3	7	7	5	8	9	7	6	5	5	5	6	6	5	7	4	7	2	7	9	5	6	8	3	3	4	2	3	2	3	4	2	2	4	1	4	3	1	3	2	4
3	9	9	9	9	9	9	9	8	7	5	4	4	5	9	9	5	5	5	5	5	7	7	3	3	4	2	3	4	3	1	2	4	3	4	1	2	3	4	3	3
3	4	6	5	5	3	5	5	5	5	5	6	5	4	4	3	5	5	5	5	5	5	5	1	1	1	1	3	1	3	1	1	1	1	1	1	2	2	2	2	3
3	6	6	5	6	7	5	5	4	4	5	5	5	5	5	5	5	4	5	4	5	4	5	3	3	3	3	3	3	3	3	2	2	3	2	2	2	3	3	2	5
3	9	7	5	9	9	9	9	5	5	9	5	5	4	5	9	5	5	5	5	1	9	9	4	3	4	4	3	4	4	4	3	2	3	3	3	2	4	4	3	5
3	2	2	8	2	5	8	2	6	2	2	5	7	2	6	6	2	2	2	8	8	8	5	2	2	3	3	2	2	2	3	2	2	3	2	2	1	2	2	2	5
3	4	4	6	5	3	7	4	5	4	3	6	5	6	6	3	3	2	6	6	6	3	6	3	2	3	2	3	2	3	1	1	1	3	2	2	2	3	3	3	4
3	7	5	5	3	9	5	8	9	9	5	5	5	6	5	8	4	4	4	9	5	5	7	3	2	4	3	4	4	3	3	2	3	2	2	3	3	2	2	3	3
3	3	4	7	5	1	8	2	4	2	3	7	8	3	6	2	1	1	7	2	7	4	7	2	1	1	1	1	1	1	1	2	1	3	3	3	2	1	3	1	2
3	4	5	5	1	7	6	5	7	6	1	4	5	7	6	8	8	4	6	8	6	8	8	3	2	4	3	3	3	3	2	2	3	3	2	2	3	3	2	3	4
3	3	3	7	1	1	8	1	1	1	3	8	7	5	6	1	1	1	8	3	7	2	7	2	1	1	2	3	1	3	2	2	1	1	1	2	3	2	4	1	1
3	2	4	5	5	1	9	5	6	3	1	7	7	3	7	3	3	1	1	1	4	4	6	2	1	1	2	2	1	1	1	1	1	1	1	1	2	2	3	2	2
3	9	9	5	9	9	5	9	9	9	9	6	5	9	6	9	9	9	5	9	5	9	6	4	1	4	4	3	4	4	4	3	4	1	2	2	2	2	2	4	1
3	5	5	5	6	9	5	9	5	5	5	5	5	5	5	5	9	5	5	9	4	9	5	3	1	4	3	2	4	3	3	2	3	2	1	1	2	1	3	3	2
3	9	5	5	9	9	5	9	5	9	5	5	5	2	5	1	1	1	5	9	5	5	9	3	2	3	4	3	4	4	3	3	2	2	4	4	2	3	2	3	5
3	7	7	3	2	8	3	7	7	5	2	2	9	7	5	5	3	5	8	5	5	5	5	4	3	3	4	4	3	4	2	3	3	3	2	3	3	2	2	3	3
3	9	5	5	5	7	5	5	3	7	5	5	5	5	5	7	5	5	5	5	7	5	5	3	1	2	2	3	4	3	3	2	3	2	1	4	4	1	3	2	1
3	3	4	7	5	1	8	2	4	2	3	7	8	3	6	2	1	1	7	2	7	4	7	2	1	1	1	1	1	1	1	2	1	3	3	3	2	1	3	1	2
3	7	7	5	5	9	5	5	4	6	5	6	5	7	5	4	5	3	5	7	6	5	5	2	2	3	3	3	3	3	2	2	2	2	1	2	3	2	3	2	3
3	8	9	4	6	9	6	9	9	9	2	5	3	9	2	9	9	9	3	9	6	2	6	3	3	4	4	4	4	3	4	4	4	2	3	4	3	2	2	3	5
3	7	5	5	5	9	6	5	5	3	5	5	5	8	5	3	5	3	5	8	3	7	5	2	2	4	4	1	3	3	3	1	3	2	2	2	2	3	3	3	6
3	7	5	5	5	8	6	8	6	8	5	6	6	4	5	6	2	2	5	2	6	5	5	2	3	3	2	3	3	2	2	1	2	3	1	2	2	3	3	3	4
3	9	8	1	8	9	2	6	9	9	9	2	3	5	2	1	2	2	7	9	9	5	9	3	2	4	3	3	3	3	3	2	2	3	3	2	2	3	3	3	5
3	7	7	7	7	8	7	7	7	7	7	6	6	7	6	6	6	5	5	4	6	4	6	2	3	3	2	2	3	2	2	2	3	3	3	2	3	4	3	1	6
3	1	1	4	1	6	5	5	5	5	2	6	4	2	6	1	1	1	5	5	5	4	5	2	2	3	1	1	1	1	2	1	1	2	2	3	2	1	4	1	4
3	7	7	7	7	8	7	7	7	7	7	6	6	7	6	6	6	5	5	4	6	4	6	2	3	3	2	2	3	2	2	2	3	3	3	2	3	4	3	1	6
3	9	5	5	7	9	5	9	3	7	2	4	4	6	7	9	8	1	3	9	3	4	5	4	2	4	3	4	4	3	4	4	3	2	1	4	3	3	2	4	3
3	1	1	5	5	5	5	1	5	1	4	5	5	5	5	5	5	1	5	1	5	5	5	3	1	1	1	4	1	4	4	2	1	2	2	2	2	3	3	1	4
3	7	5	5	5	8	6	6	4	6	4	5	5	4	5	2	4	4	4	5	7	5	6	3	2	3	1	2	3	2	2	3	2	3	3	3	2	3	3	3	5
3	5	5	5	5	5	5	5	8	6	7	4	4	4	6	6	6	6	6	6	6	6	6	3	3	2	2	3	3	3	3	3	3	1	2	3	2	2	2	2	4
3	6	6	4	5	7	5	6	6	5	8	4	3	5	5	4	7	4	4	5	7	4	6	1	2	2	3	3	3	2	1	3	1	4	3	3	3	1	4	3	8
3	5	5	9	5	9	9	5	9	5	1	9	9	5	9	1	1	1	9	1	9	5	9	1	2	3	1	2	1	1	1	3	3	2	3	1	1	1	3	1	4
3	7	7	5	5	7	5	4	5	4	5	5	5	6	5	4	4	4	5	3	5	4	5	3	3	3	2	3	2	2	1	1	2	3	4	2	2	3	3	3	5
3	1	3	5	7	2	8	2	2	2	3	5	7	5	6	1	2	1	5	1	5	3	5	2	1	1	1	3	1	2	3	2	2	1	1	1	2	3	2	2	2
3	4	5	6	5	6	5	5	4	4	3	6	5	4	5	4	4	3	5	5	5	4	5	1	1	2	1	2	1	1	1	1	1	1	1	1	2	1	1	1	1
3	6	6	6	6	8	6	4	7	7	6	5	5	7	5	7	7	7	5	5	5	7	7	3	3	3	3	3	3	3	2	3	3	2	3	2	3	3	3	3	6
3	9	9	5	9	9	6	9	6	9	5	5	5	9	5	9	9	6	4	4	3	5	5	3	3	4	4	4	4	4	4	3	2	3	3	2	2	4	3	3	5
3	9	9	5	9	9	7	9	5	7	5	5	5	8	5	9	9	7	5	9	4	8	7	4	1	4	4	4	4	4	4	3	4	2	1	3	3	3	3	4	2
3	4	8	5	7	5	5	8	8	4	5	5	5	5	7	7	5	5	5	3	3	5	7	2	3	2	3	3	2	2	2	2	2	3	3	3	2	3	3	3	5
3	5	5	5	3	4	5	5	3	4	5	7	5	7	5	5	4	3	5	3	4	5	5	3	3	2	1	2	2	3	1	1	1	4	3	2	2	3	4	2	5
3	5	5	5	5	7	5	6	4	6	3	5	5	5	5	2	1	3	5	6	5	4	5	2	3	2	1	1	2	1	1	2	1	4	3	1	1	4	2	2	7
3	4	4	6	4	5	6	5	5	4	5	5	6	5	6	5	4	5	5	5	5	5	5	2	2	2	2	2	2	2	2	1	1	1	1	1	2	4	3	2	6
3	4	7	5	7	9	5	3	3	2	5	6	5	4	5	7	4	5	5	6	6	3	6	1	1	2	1	2	1	2	2	2	1	1	1	1	1	1	2	1	1
3	2	2	5	2	1	5	2	5	2	5	5	5	3	5	2	1	1	5	2	5	2	5	1	1	1	1	2	1	1	1	1	1	1	3	1	1	3	2	2	4
3	1	5	5	1	9	5	1	5	9	1	5	5	9	5	1	1	1	5	1	5	1	5	3	3	3	2	2	1	3	1	1	1	4	4	1	1	4	3	4	3
3	9	9	9	9	9	9	9	9	6	9	6	6	9	8	9	9	9	6	9	6	9	8	4	3	4	4	4	4	4	4	4	3	2	2	4	4	2	2	4	2
3	9	9	5	9	9	6	9	6	9	5	5	5	9	5	9	9	6	4	4	3	5	5	3	3	4	4	4	4	4	4	3	2	3	3	2	2	4	3	3	5
3	2	5	5	5	7	5	6	2	2	5	5	5	6	5	7	2	2	5	2	5	2	5	2	2	4	1	2	1	2	1	1	2	3	3	1	1	4	3	2	3
3	7	7	5	6	5	9	7	9	5	5	7	5	2	5	5	9	7	5	5	7	5	6	1	1	2	4	2	1	2	3	3	1	2	4	2	1	4	2	4	4
3	1	5	5	9	9	7	8	2	2	5	5	5	5	5	9	8	5	7	9	5	5	5	3	2	4	2	3	3	2	3	2	2	2	1	4	2	4	2	1	2
3	7	5	5	5	7	5	5	4	5	5	5	5	5	5	6	3	3	5	5	5	5	5	3	1	3	1	3	2	1	1	1	1	2	1	2	2	2	3	1	1
3	1	1	5	5	1	5	1	5	1	5	6	6	5	6	1	5	5	5	1	6	2	7	1	1	1	1	1	1	3	1	1	2	1	1	1	1	1	4	3	1
3	3	4	5	6	7	5	6	2	1	1	6	5	5	5	3	1	1	5	6	3	3	6	3	2	3	2	3	2	1	2	3	3	2	2	2	2	1	2	2	3
3	3	3	5	2	5	5	5	5	5	5	5	5	3	5	4	1	1	5	3	5	5	5	1	3	2	2	2	1	3	1	2	3	4	3	2	2	2	2	2	4
3	1	5	5	5	7	5	3	1	1	5	7	8	3	5	1	1	1	8	3	7	5	5	2	1	2	1	3	1	3	2	2	1	1	1	2	1	1	1	2	1
3	9	6	6	2	9	5	9	1	1	7	6	5	7	5	9	5	3	3	7	5	8	6	3	2	4	4	3	3	3	1	2	2	1	1	3	3	3	2	4	5
3	7	7	2	7	9	3	9	9	7	7	1	1	7	2	9	8	5	1	9	5	9	5	3	1	4	4	4	4	4	3	4	3	3	3	3	3	3	2	4	1
3	1	1	7	7	9	5	3	4	6	1	7	8	7	6	3	1	1	9	1	8	1	8	2	3	3	1	2	2	2	2	2	3	4	3	1	2	3	3	2	4
3	1	1	5	1	1	5	1	1	1	1	5	5	5	5	1	1	1	1	1	5	1	5	1	3	1	1	1	1	1	1	1	1	4	4	1	2	4	4	1	6
3	1	1	5	1	1	3	2	5	1	1	9	5	5	3	1	1	1	1	1	5	1	5	4	1	1	1	3	1	3	2	2	1	1	1	1	4	3	1	1	1
3	6	3	7	3	7	5	5	4	5	1	7	7	7	7	1	3	1	5	1	7	2	5	2	4	3	2	2	2	3	2	2	3	3	4	2	2	4	3	2	7
3	8	3	8	4	4	8	3	5	2	2	6	7	4	7	3	3	1	5	1	4	3	7	3	1	3	3	3	2	4	1	2	1	3	3	1	2	3	3	3	5
3	9	5	5	5	9	5	5	3	9	3	3	3	3	3	9	9	5	5	9	3	9	5	2	2	4	3	2	4	1	2	2	2	3	3	1	2	4	3	2	5
3	8	7	5	5	8	5	5	3	3	5	5	5	3	5	7	5	3	7	3	3	5	5	3	2	2	1	4	2	3	2	1	1	3	2	2	2	2	3	2	5
3	6	3	7	3	7	5	5	4	5	1	7	7	7	7	1	3	1	5	1	7	2	5	2	4	3	2	2	2	3	2	2	3	3	4	2	2	4	3	2	7
3	9	6	5	4	9	5	9	5	4	1	5	5	9	5	6	4	5	5	9	5	4	6	3	1	4	4	3	4	2	2	3	4	2	2	3	3	4	2	3	2
3	8	8	5	5	9	5	9	5	5	5	5	5	5	5	7	5	5	5	5	5	5	5	3	4	3	3	3	4	3	2	3	1	4	2	4	3	3	4	2	5
3	5	7	1	5	9	4	7	9	7	5	9	3	9	3	9	5	9	1	1	1	9	9	2	3	4	4	4	4	1	4	3	4	2	3	3	3	4	4	3	5
3	4	6	5	3	6	5	6	3	4	4	4	5	6	5	4	5	6	5	5	5	6	4	3	3	3	2	2	3	2	1	3	2	3	3	2	2	3	3	3	5
3	7	5	5	1	5	6	4	2	1	5	7	9	1	7	1	5	1	7	1	7	3	7	1	1	2	1	3	1	1	1	1	1	1	1	1	1	1	4	1	1
3	4	6	7	2	4	5	3	6	5	3	6	5	1	5	5	5	3	5	5	5	5	7	2	1	1	1	1	1	2	3	2	1	1	1	3	2	2	1	1	3
3	5	5	5	5	7	5	6	7	5	5	5	5	7	5	5	5	5	5	5	5	5	5	2	3	2	3	3	2	3	2	4	2	3	2	3	2	3	3	3	3
3	6	1	5	2	5	5	1	6	5	2	7	5	9	5	5	1	1	5	2	3	3	5	3	1	2	3	3	1	2	2	4	3	2	2	4	2	4	1	4	2
3	5	5	5	5	6	5	5	6	5	5	5	5	7	5	5	5	5	6	3	5	5	5	2	1	3	1	2	2	2	4	1	3	1	1	3	2	2	1	2	1
3	7	7	5	7	8	7	7	3	4	4	5	6	5	6	7	5	5	7	7	4	6	6	3	1	3	2	2	3	1	2	2	1	2	3	1	3	3	2	3	6
3	8	8	5	3	9	7	8	4	9	3	6	4	9	5	6	2	2	4	4	7	2	7	3	2	4	3	3	3	4	4	4	4	1	1	3	3	1	1	3	5
3	8	6	2	2	9	4	8	4	8	2	2	2	5	2	6	2	2	3	2	2	5	5	3	3	4	2	2	3	3	4	2	1	4	3	1	2	3	3	2	2
3	7	5	5	6	9	5	5	3	6	5	5	5	3	5	1	5	5	5	5	5	5	5	3	2	3	2	2	1	2	2	3	2	3	1	2	2	1	3	4	4
3	9	5	5	5	7	6	5	6	9	1	5	5	9	5	1	9	1	3	9	5	5	5	2	2	3	3	1	4	3	1	1	3	3	3	1	1	4	4	3	5
3	7	7	6	7	7	6	7	8	7	5	6	5	7	6	7	6	5	5	5	6	4	6	3	2	4	3	3	3	2	2	3	3	2	3	2	2	3	2	2	2
3	6	7	5	6	8	5	7	4	5	4	5	5	3	5	7	7	5	5	6	3	5	5	3	2	3	3	3	3	3	2	3	2	2	2	3	2	4	2	3	3
3	3	5	4	7	9	4	7	5	3	7	5	6	7	5	8	4	3	7	7	6	6	5	3	3	4	4	3	2	3	3	3	3	3	3	2	2	3	3	3	4
3	5	5	5	5	5	7	5	5	5	5	6	5	5	5	5	5	5	5	5	5	2	7	3	1	2	2	3	1	1	2	2	1	1	1	1	2	1	2	2	3
3	6	6	2	6	6	5	6	2	2	2	5	5	2	5	5	5	2	5	3	5	2	5	2	3	3	2	1	1	1	1	1	1	3	3	1	2	3	2	2	3
3	7	7	7	7	9	8	6	5	2	5	5	5	7	5	7	7	7	5	3	5	5	7	3	1	3	2	2	2	2	3	3	2	4	1	3	3	4	4	4	7
3	5	5	2	5	3	1	5	4	5	3	5	5	3	2	5	5	5	1	5	2	5	2	2	3	2	2	2	1	2	3	2	1	3	2	1	3	2	4	1	5
3	7	5	5	6	3	6	3	3	3	3	5	5	2	5	3	3	3	6	3	6	3	5	2	2	2	1	2	1	1	2	2	1	3	2	1	1	1	3	1	1
3	5	7	5	6	7	7	5	4	4	5	4	5	3	5	6	4	2	5	4	1	1	6	3	1	4	4	4	2	4	4	2	1	2	1	1	3	1	3	4	1
3	6	6	6	4	2	5	3	4	6	3	6	5	5	5	1	2	2	5	5	5	5	5	2	1	3	1	3	3	4	3	2	1	2	1	2	2	2	3	2	3
3	5	5	5	4	7	5	5	4	5	5	5	5	3	5	3	5	3	5	5	6	4	5	1	2	3	2	2	2	1	2	1	1	1	1	2	2	2	3	2	3
3	5	5	5	5	5	5	5	5	5	5	5	6	4	5	6	6	5	5	5	6	5	5	1	1	1	1	2	1	1	2	3	1	1	1	2	3	1	1	1	1
3	6	4	3	7	7	6	4	5	6	2	2	5	7	5	7	5	6	8	8	5	7	5	1	1	3	3	2	3	2	2	2	3	2	2	2	2	1	3	3	5
3	7	6	5	5	7	5	7	4	7	5	5	5	7	6	5	5	5	5	5	6	6	5	2	1	2	3	2	2	2	2	3	1	3	1	1	2	1	2	3	3
3	6	5	5	5	7	6	5	5	5	5	6	5	7	5	5	5	5	5	7	5	5	6	2	3	3	2	2	2	2	2	2	3	3	2	2	1	1	3	3	4
3	4	4	5	6	6	5	6	7	4	6	5	5	5	5	5	5	4	6	3	5	5	5	1	3	2	1	1	1	1	1	1	2	2	1	1	2	4	3	2	5
3	7	3	5	3	9	7	9	7	9	1	5	5	1	5	1	7	2	8	1	5	5	5	4	3	4	4	4	2	4	4	4	1	1	1	3	2	4	2	3	1
3	6	6	5	5	4	7	3	4	3	5	5	5	4	6	3	4	4	5	5	4	5	7	3	2	1	2	1	1	2	2	2	1	3	3	3	2	3	3	2	3
3	5	5	5	5	5	5	5	5	5	5	5	5	5	5	5	5	5	5	5	6	5	5	1	1	1	1	2	1	2	2	1	1	1	1	1	2	1	1	1	4
3	9	5	5	5	9	7	9	5	7	6	5	5	7	5	3	7	2	3	7	6	9	5	3	3	4	2	4	4	2	1	2	2	3	1	2	3	3	3	4	3
3	5	5	5	5	1	6	5	4	2	5	5	5	5	6	3	5	3	5	5	5	2	5	1	2	1	1	1	1	1	1	1	1	2	1	1	1	3	4	2	4
3	5	5	5	3	7	5	6	5	4	4	8	5	4	5	7	2	2	5	5	4	3	5	3	1	3	4	3	2	3	4	4	1	1	1	3	3	3	3	4	2
3	7	7	5	5	7	5	5	5	5	5	5	5	4	5	4	5	4	5	5	4	5	5	3	2	3	2	2	2	2	3	3	2	2	2	3	2	2	2	2	6
3	3	1	5	5	5	7	5	6	5	5	8	7	3	7	3	2	5	7	2	7	5	5	2	4	3	2	3	1	2	1	1	2	3	3	1	2	2	3	2	6
3	3	2	5	1	6	7	3	9	4	7	3	9	1	6	9	5	2	5	5	5	7	5	3	2	4	4	2	4	2	4	2	2	2	1	2	1	2	3	2	3
3	5	4	6	7	8	8	5	3	2	5	6	5	7	5	4	3	5	5	5	6	5	5	1	1	1	1	1	1	1	1	1	2	3	1	1	1	1	3	1	1
3	1	1	6	1	4	6	1	1	1	4	1	5	3	5	1	1	1	5	1	5	1	5	2	2	1	2	1	1	2	1	1	1	3	1	1	1	1	4	1	1
3	4	6	5	3	8	5	6	3	3	5	5	5	4	5	6	4	3	5	4	5	5	6	1	1	3	3	3	2	3	3	3	3	3	1	3	2	4	2	2	2
3	6	5	5	5	7	6	3	4	3	4	5	6	6	7	6	4	4	7	7	5	4	5	1	4	2	1	2	2	1	1	1	2	4	4	2	2	1	3	1	7
3	8	6	5	5	9	6	7	3	7	5	5	7	5	5	4	4	1	5	5	6	4	6	3	2	3	3	4	3	2	2	2	2	2	1	2	3	2	3	3	3
3	9	8	7	8	9	8	5	4	7	5	5	5	5	5	5	5	5	7	5	5	3	7	3	2	3	2	2	3	2	2	2	2	3	3	2	3	3	3	2	5
3	1	1	6	1	9	6	8	1	1	1	5	5	4	6	5	5	1	5	5	5	5	6	4	4	4	4	4	2	4	4	3	1	4	2	3	1	4	2	4	3
3	3	3	5	3	7	5	3	2	7	2	5	5	6	5	2	2	3	1	3	5	4	5	2	1	3	3	3	2	3	3	3	3	1	1	2	1	2	3	3	4
3	1	1	6	1	9	6	8	1	1	1	5	5	4	6	5	5	1	5	5	5	5	6	4	4	4	4	4	2	4	4	3	1	4	2	3	1	4	2	4	3
3	4	4	6	4	6	4	4	3	3	3	6	6	3	6	4	3	3	2	5	5	3	5	2	1	2	1	1	1	1	1	1	1	1	1	3	3	4	3	1	6
3	4	5	5	6	3	5	5	3	5	5	5	5	4	5	4	2	2	2	5	3	5	5	1	1	2	1	1	1	2	1	2	1	2	2	1	2	1	2	1	4
3	7	7	4	5	7	5	6	4	4	5	7	5	5	3	3	4	3	5	5	5	5	5	4	4	3	2	2	2	3	1	2	2	3	4	2	1	3	3	1	7
3	9	7	1	5	9	4	7	5	7	9	1	5	4	1	9	1	1	5	7	5	1	7	4	1	4	4	2	4	3	1	1	4	1	1	3	1	2	2	4	1
3	1	7	7	5	7	6	6	5	5	5	6	5	5	5	6	1	1	5	1	6	1	5	3	3	3	3	3	1	4	3	2	3	3	3	2	1	2	3	2	4
3	3	5	4	5	4	5	1	5	3	6	5	7	5	5	4	5	1	5	1	5	5	5	3	1	2	2	2	1	2	3	2	1	4	1	3	3	2	2	2	3
3	3	3	5	4	1	6	3	3	1	4	5	6	5	5	2	3	1	5	4	5	3	6	2	1	2	1	2	2	2	1	1	1	1	1	1	2	1	3	1	1
3	3	7	4	6	7	7	7	6	3	5	4	5	6	4	7	6	3	4	4	4	6	5	3	2	1	2	2	2	2	2	1	2	1	2	1	2	3	1	3	3
3	3	6	5	5	6	1	7	1	6	1	5	1	5	1	6	3	5	3	1	3	6	5	2	4	3	2	3	3	1	1	1	1	4	4	1	1	4	4	2	8
3	7	5	5	5	8	5	5	4	5	3	5	5	5	5	7	5	3	5	5	5	5	5	3	1	3	3	3	3	3	3	3	3	2	2	2	2	3	3	4	3
3	3	2	5	5	7	5	4	7	5	5	3	5	2	2	5	5	5	5	6	5	5	7	3	4	3	3	2	2	3	3	3	2	3	4	2	1	4	3	1	5
3	5	5	5	5	5	5	5	5	5	5	5	5	5	5	5	5	5	7	5	5	3	5	1	1	1	1	4	1	1	1	1	1	1	4	1	4	4	1	1	8
3	5	9	3	3	9	4	4	8	5	7	1	2	3	1	1	1	1	2	1	9	2	9	2	3	2	1	1	1	2	2	1	2	3	2	2	2	3	4	2	5
3	5	5	5	5	5	5	5	5	4	5	5	5	5	5	5	5	5	5	5	5	5	5	2	1	2	1	2	1	2	2	1	1	1	1	1	2	1	1	1	2
3	7	6	5	4	8	7	7	5	5	5	5	5	5	6	7	4	5	5	5	4	5	5	1	2	3	4	1	3	2	2	3	1	2	1	2	2	2	2	3	6
3	2	5	5	5	7	6	6	4	1	2	5	5	3	3	2	2	3	2	1	2	2	5	3	2	3	2	3	2	3	2	2	2	2	1	1	1	2	4	2	2
3	1	4	6	4	9	7	6	1	1	3	7	7	1	6	3	3	1	7	1	5	7	5	2	1	3	1	3	2	4	2	1	3	1	1	2	2	1	2	2	2
3	5	5	5	5	5	5	5	5	5	5	5	5	5	5	5	5	3	8	5	5	5	7	2	1	1	1	1	1	1	2	1	1	1	1	1	1	1	1	1	1
3	9	9	5	9	9	5	5	2	2	5	5	5	5	5	1	5	1	2	2	5	5	5	2	1	4	1	1	1	2	1	3	3	2	1	1	2	4	1	3	3
3	3	7	5	7	9	6	8	5	3	5	5	5	7	5	7	7	2	6	7	5	7	6	2	4	4	3	2	2	1	1	2	2	4	4	1	2	4	3	3	4
3	4	4	5	4	4	7	3	3	3	2	7	7	6	7	2	2	3	3	3	7	3	8	3	2	3	3	4	2	4	1	1	4	3	4	2	2	4	3	4	6
3	2	4	5	6	2	5	4	2	2	2	5	5	3	6	2	1	1	5	2	5	2	6	2	1	2	1	3	1	2	2	2	2	1	1	1	2	2	3	2	2
3	1	6	5	6	9	6	9	7	1	1	5	5	6	5	1	5	1	4	1	4	5	6	4	2	4	4	2	1	3	1	1	2	4	3	1	1	3	3	4	6
3	7	7	3	5	9	5	8	6	7	5	5	5	8	5	8	6	7	5	5	5	5	5	2	3	3	2	2	3	2	2	2	3	3	2	3	2	3	3	2	4
3	9	9	2	1	4	5	9	5	9	1	1	5	6	3	1	1	1	5	3	1	9	5	3	3	3	4	3	4	3	3	2	4	2	1	2	1	2	2	4	1
3	4	6	5	6	8	7	7	5	7	5	7	7	7	8	8	6	7	4	8	8	4	7	3	2	4	3	4	2	4	3	2	4	2	1	3	3	3	2	3	3
3	5	5	5	5	5	5	5	5	5	5	5	5	5	5	5	5	5	5	5	5	5	5	2	2	3	3	1	2	2	1	3	1	2	2	3	2	1	2	2	3
3	7	7	5	5	7	5	7	5	7	5	5	5	9	5	8	5	5	5	5	5	5	5	4	4	4	3	3	3	3	4	4	4	3	4	3	4	4	2	3	6
3	5	5	5	2	3	5	5	5	5	5	5	5	5	5	3	2	5	5	5	5	5	5	1	1	1	1	1	1	1	1	1	1	1	1	1	1	1	1	1	1
3	5	5	5	5	5	5	5	5	5	5	5	5	5	5	5	5	5	5	5	5	5	5	3	1	1	2	3	1	3	2	1	1	1	1	1	1	4	4	2	6
3	6	5	6	3	6	5	4	4	6	5	5	5	4	5	6	5	6	5	7	5	5	5	2	3	3	1	2	3	1	2	2	2	4	2	1	1	2	3	1	6
3	9	9	1	9	9	5	9	6	9	5	1	1	1	1	6	3	2	5	5	2	1	8	1	1	4	3	3	4	4	4	4	3	2	1	3	1	4	3	2	4
3	3	2	5	3	7	8	5	5	7	5	6	5	6	5	4	3	2	6	3	7	4	7	3	3	3	3	3	2	4	3	2	3	3	3	2	1	3	2	4	4
3	5	5	5	4	1	6	4	3	3	3	7	5	5	6	3	2	3	5	2	6	5	6	3	1	1	1	3	2	3	3	2	1	1	1	2	2	3	2	1	1
3	4	4	5	5	7	5	6	6	4	4	5	5	4	5	5	3	3	5	5	5	5	5	2	1	2	1	2	2	3	2	1	1	1	1	1	1	3	3	1	2
3	4	6	5	5	3	5	6	5	5	5	7	6	5	5	4	5	5	5	5	5	5	5	3	2	2	2	3	2	3	1	1	1	3	1	1	2	2	2	1	3
3	6	7	5	7	8	3	8	5	6	1	5	4	4	5	1	1	1	5	4	3	4	7	3	3	3	1	3	3	3	1	1	3	4	2	2	2	2	4	2	5
3	4	7	5	7	7	7	7	5	4	3	5	5	5	5	8	5	7	5	4	5	5	5	4	2	3	1	2	2	3	2	2	2	2	1	1	3	2	2	1	2
3	9	9	1	9	9	5	9	6	9	5	1	1	1	1	6	3	2	5	5	2	1	8	1	1	4	3	3	4	4	4	4	3	2	1	3	1	4	3	2	4
3	7	9	1	6	9	2	9	7	7	5	4	4	8	2	9	6	4	5	5	5	4	5	2	3	4	2	3	2	2	2	2	3	4	2	1	2	2	3	2	6
3	8	7	6	5	9	5	7	3	6	7	4	3	5	3	9	7	5	5	7	2	7	7	2	3	4	4	3	4	4	2	2	2	2	2	2	2	4	3	3	4
3	8	8	5	9	9	4	8	7	8	5	4	4	6	4	8	6	5	5	5	5	7	5	3	1	4	3	3	3	3	3	3	3	2	2	3	3	2	2	3	3
3	7	6	5	5	9	5	8	1	1	5	5	5	9	6	9	5	1	7	1	1	9	5	3	1	4	2	2	3	4	4	1	2	1	1	1	2	1	3	3	5
3	2	5	5	5	8	7	5	2	2	5	5	5	5	5	4	5	2	5	5	7	5	5	2	1	3	1	1	1	1	2	1	1	1	1	1	2	4	4	2	2
3	1	1	5	5	7	5	6	5	8	1	5	5	5	5	7	1	1	3	1	5	7	5	1	2	3	2	1	1	1	1	1	1	1	2	1	2	3	3	2	3
3	7	9	6	3	9	6	3	3	4	1	5	5	6	7	6	3	3	7	3	3	4	7	3	2	4	4	3	3	3	3	2	3	4	3	2	3	3	3	3	5
3	6	4	5	6	6	6	5	4	6	5	5	5	5	5	3	3	3	4	6	5	6	5	2	1	3	1	1	3	1	2	1	3	2	3	2	1	3	2	2	6
3	4	7	5	7	7	7	7	5	4	3	5	5	5	5	8	5	7	5	4	5	5	5	4	2	3	1	2	2	3	2	2	2	2	1	1	3	2	2	1	2
3	6	5	5	5	7	5	3	4	5	5	5	5	5	5	6	5	1	5	5	5	5	5	3	1	2	1	1	1	3	1	2	1	3	2	1	1	3	3	1	3
3	3	3	5	2	3	7	5	4	2	5	7	5	3	6	4	3	5	5	2	4	5	5	2	1	2	2	2	1	2	3	2	2	1	1	2	3	2	2	3	1
3	7	7	2	5	9	5	5	1	1	5	7	7	5	5	1	1	5	5	1	5	9	5	1	1	3	1	3	2	1	3	1	1	3	3	1	2	4	2	1	4
3	9	7	6	8	9	6	8	1	9	1	5	7	1	6	1	1	1	9	1	5	1	5	4	4	3	2	3	2	4	4	4	1	3	4	3	1	4	3	1	5
3	5	5	5	5	9	5	5	5	5	5	5	5	7	5	3	2	1	5	5	5	5	5	1	3	4	1	2	1	1	1	1	2	4	1	2	2	1	3	2	1
3	1	3	5	4	2	5	5	2	1	3	6	6	3	5	3	1	1	3	1	5	5	5	2	1	2	1	1	1	2	1	1	3	1	2	2	2	2	3	2	1
3	3	1	5	3	7	5	2	7	7	3	5	6	7	5	5	3	2	5	6	5	4	5	3	1	4	2	2	1	3	3	2	3	1	1	1	2	2	3	3	1
3	9	7	5	9	9	5	8	5	5	5	6	5	9	5	9	9	9	9	9	4	9	5	3	2	3	3	3	4	3	4	3	3	3	3	4	3	2	2	2	6
3	5	5	5	5	5	5	5	5	5	5	5	5	7	5	5	5	5	5	5	5	5	5	2	1	2	2	2	2	2	1	1	1	1	1	3	3	3	3	2	1
3	8	8	5	5	1	6	7	5	7	2	6	5	5	6	5	7	3	5	8	5	5	5	3	2	2	2	1	3	3	1	1	3	3	3	1	1	3	3	2	6
3	6	6	4	4	8	4	6	5	7	3	6	3	4	4	3	3	3	7	9	3	3	6	3	3	3	2	2	2	3	2	3	2	2	3	2	2	3	3	2	5
3	5	5	7	6	8	8	5	3	5	5	7	5	5	6	6	5	1	5	6	6	5	5	3	1	3	1	3	3	3	4	3	2	2	1	2	2	1	2	1	1
3	5	5	5	5	5	5	5	5	5	5	5	5	5	5	3	5	5	5	5	5	5	5	1	1	1	1	3	1	3	3	3	1	1	1	2	1	2	3	3	1
3	5	7	5	9	9	9	9	1	1	9	6	5	5	7	1	1	9	9	5	5	4	5	3	2	4	4	3	4	3	4	4	4	2	2	4	4	3	2	4	3
3	5	5	7	4	8	7	7	3	3	2	6	5	3	7	2	1	1	5	3	6	5	6	3	3	3	2	3	2	2	1	3	2	3	2	1	3	3	2	1	3
3	3	3	5	5	1	5	5	5	3	3	5	5	3	4	3	3	1	5	1	5	5	5	1	2	1	1	1	1	1	1	1	1	1	1	1	1	4	1	1	5
3	2	7	5	7	7	5	5	5	3	5	5	5	5	5	3	2	3	3	3	5	7	5	2	2	3	2	2	2	3	2	3	2	2	2	1	2	3	2	2	1
3	3	3	6	3	3	6	3	5	3	3	5	5	5	5	2	4	3	5	3	5	4	5	2	2	2	2	2	1	3	2	2	3	3	2	2	2	1	3	1	5
3	3	3	6	3	9	6	3	3	9	3	7	7	9	7	3	3	3	5	8	5	5	5	1	2	4	3	2	3	3	3	2	3	3	1	1	2	2	2	2	3
3	7	7	9	6	9	5	5	9	8	9	3	3	8	7	6	5	5	5	5	5	5	5	1	1	3	1	1	1	1	3	3	1	1	1	2	3	1	2	2	1
3	7	7	5	7	7	5	7	7	7	7	5	5	3	5	5	7	4	5	4	5	5	5	3	3	3	2	2	4	3	2	2	2	3	2	2	2	3	2	2	4
3	6	5	3	1	8	5	6	4	9	4	4	4	5	5	1	1	3	1	1	3	4	5	3	3	4	4	4	2	3	3	2	2	3	2	2	2	3	3	3	4
3	1	2	5	5	1	6	3	2	2	5	5	6	7	6	9	3	1	6	7	5	3	6	3	3	4	4	2	3	2	4	1	2	3	1	1	3	2	3	3	3
3	7	7	4	7	3	5	7	5	8	3	5	5	4	5	1	6	4	4	4	3	6	5	4	2	3	3	4	3	4	3	2	2	3	3	3	3	3	3	4	4
3	1	7	5	9	9	5	4	3	1	5	5	7	5	7	4	6	2	4	3	5	7	5	4	3	4	3	4	3	4	2	2	3	3	2	4	3	3	3	3	4
3	6	6	5	6	6	5	6	4	4	5	5	5	5	5	3	3	3	5	6	5	5	5	3	3	3	1	1	4	4	1	2	1	4	3	1	2	2	3	2	4
3	7	3	5	3	7	5	3	5	3	5	6	6	5	5	3	3	3	7	3	6	5	5	2	3	3	1	2	3	2	1	1	2	3	2	1	1	3	4	2	3
3	5	5	5	5	5	5	5	1	5	5	5	5	7	5	5	5	1	5	5	5	3	5	3	1	1	1	3	1	3	2	3	2	1	2	2	1	4	3	2	1
3	2	3	5	5	6	7	4	5	4	5	7	7	6	6	2	3	1	9	2	5	5	6	3	4	3	1	3	1	2	2	2	3	3	1	1	2	2	4	2	2
3	9	5	2	1	9	6	9	1	1	3	2	2	7	1	3	8	6	8	1	1	5	6	3	4	4	4	3	3	3	2	1	3	3	4	3	2	2	3	3	3
3	1	2	6	3	4	6	3	5	2	2	5	5	3	5	2	1	3	5	3	5	4	5	2	3	2	1	2	1	2	2	1	1	3	3	2	2	3	3	2	4
3	5	6	5	6	7	5	6	5	4	5	5	5	5	5	6	6	4	6	6	4	4	6	2	3	3	2	2	2	3	1	2	2	3	3	2	2	3	3	2	4
3	1	1	5	1	6	5	1	5	1	5	5	6	1	6	6	1	4	6	1	6	5	6	2	2	1	1	2	1	2	1	1	1	2	2	1	1	4	3	1	4
3	3	3	5	8	9	5	9	9	9	5	5	5	9	5	9	9	9	5	1	5	7	5	2	2	4	4	1	1	3	4	4	3	2	2	4	4	4	2	3	1
3	1	1	9	1	1	9	1	1	1	1	9	9	1	9	1	1	1	1	1	1	1	1	2	4	1	1	1	1	1	4	2	2	2	4	1	1	4	3	1	5
3	8	8	1	1	9	1	9	1	9	1	5	5	5	5	9	5	5	5	9	5	9	5	3	3	4	4	2	4	3	2	4	1	3	3	2	1	1	4	4	4
3	5	5	6	5	8	6	5	4	5	4	6	6	5	5	4	4	3	5	5	5	5	5	3	1	3	1	2	2	3	1	3	1	1	3	1	1	2	3	1	2
3	9	9	5	1	9	5	9	1	9	1	5	5	9	5	1	1	1	5	9	3	9	6	2	1	4	3	3	4	3	2	4	4	1	1	2	2	2	2	4	3
3	1	3	9	3	9	9	1	1	1	1	9	9	9	9	1	9	1	1	1	9	1	9	3	1	2	2	4	2	4	4	3	2	2	2	3	3	3	3	3	2
3	3	5	5	5	5	6	5	3	2	5	5	6	5	5	5	5	2	6	3	5	5	7	2	4	1	1	1	1	2	1	1	1	4	4	1	1	3	4	2	7
3	5	7	5	7	8	5	7	4	5	4	5	5	7	5	7	4	6	7	3	3	5	6	3	3	4	3	3	2	3	2	2	3	2	1	1	1	2	3	3	4
3	1	1	5	1	1	5	5	7	5	1	5	5	5	5	5	1	1	5	5	5	1	5	4	4	1	4	4	1	4	2	2	1	3	4	4	3	4	3	3	5
3	8	6	4	1	9	5	7	5	7	4	5	5	4	5	3	7	5	5	3	1	5	2	3	3	4	2	3	3	2	3	3	2	4	2	3	3	3	4	1	3
3	5	5	5	5	7	9	5	9	9	5	9	9	9	9	3	3	3	9	3	9	3	9	2	1	3	3	3	2	4	4	3	2	2	2	2	2	4	3	3	6
3	9	9	1	5	9	5	6	6	9	3	3	4	8	5	6	4	6	4	4	3	9	5	3	2	4	4	3	3	4	2	2	3	2	1	2	1	1	2	4	1
3	9	9	4	9	9	1	9	9	9	9	3	5	9	1	9	9	9	9	9	3	9	1	4	3	1	1	1	1	1	1	1	1	4	2	1	2	3	2	2	4
3	6	7	5	7	6	5	6	7	8	5	5	5	6	5	9	5	5	5	7	6	5	5	3	1	3	1	3	3	3	3	3	3	3	2	2	2	4	3	2	3
3	6	4	5	1	7	5	3	2	6	1	6	5	8	4	3	1	2	5	1	5	2	6	2	2	2	2	3	2	1	3	3	2	1	1	3	4	3	3	2	3
3	3	1	5	3	1	5	1	2	1	1	6	5	5	3	2	5	1	4	6	5	3	5	1	1	1	1	1	1	1	1	1	1	2	1	1	2	3	4	1	4
3	4	4	5	4	9	5	9	4	9	3	4	4	9	4	9	9	9	9	9	4	6	5	3	4	4	4	4	4	4	4	4	4	4	4	4	1	1	3	3	5
3	3	3	7	6	6	8	2	5	1	5	8	9	2	5	6	4	1	5	5	7	5	7	3	1	3	2	4	1	3	1	2	1	1	1	3	1	1	1	2	2
3	5	6	5	4	4	7	6	4	5	4	6	5	4	5	3	2	3	5	4	4	3	5	2	3	2	3	1	1	2	4	1	2	3	4	2	2	2	4	2	6
3	5	7	4	3	9	5	2	6	9	2	5	5	5	4	3	2	1	6	6	5	7	5	2	3	4	4	3	3	4	4	4	4	1	2	3	3	4	2	3	3
3	8	5	3	5	9	5	7	3	8	5	5	5	5	5	5	3	1	5	3	5	5	5	2	3	4	2	2	3	3	3	2	3	3	2	1	2	3	3	2	4
3	6	6	5	5	6	5	6	6	6	5	5	5	4	5	4	5	5	5	6	5	5	5	4	1	4	2	3	3	3	2	3	2	2	2	2	2	3	2	3	3
3	5	5	6	5	6	6	5	5	4	5	5	5	6	5	4	5	3	5	5	5	5	6	2	1	1	1	1	1	1	1	1	1	1	1	1	1	4	1	2	5
3	7	6	6	3	4	5	4	5	1	5	5	6	5	5	3	1	2	5	3	7	1	5	2	1	2	1	2	1	2	2	3	2	2	1	2	2	3	1	2	2
3	8	8	1	5	8	1	8	5	8	8	1	1	1	2	8	1	1	1	8	1	2	8	2	3	3	2	2	3	2	2	1	2	4	4	2	2	4	3	2	8
3	6	8	5	7	8	6	6	4	6	5	6	5	6	5	6	5	5	6	8	4	7	5	3	3	3	2	3	3	3	2	1	1	2	3	1	2	2	2	2	4
3	4	5	5	5	3	5	7	3	5	5	5	5	5	2	3	5	5	5	5	1	5	5	2	4	1	1	1	1	3	1	1	1	4	3	1	1	4	4	1	6
3	3	5	5	4	9	5	8	9	3	4	4	5	7	4	9	7	5	3	8	4	7	4	2	2	3	2	3	2	3	2	2	3	2	2	2	2	2	3	2	4
3	4	4	5	9	8	5	9	2	2	3	5	5	5	5	4	2	2	5	2	5	7	6	2	1	3	3	3	2	1	2	1	1	2	1	2	1	1	3	3	1
3	4	6	5	4	6	5	5	3	4	5	5	5	4	5	4	3	3	5	4	5	5	5	2	1	2	2	3	2	3	1	2	2	1	2	2	2	2	2	3	7
3	7	7	3	7	7	1	7	6	7	6	2	2	5	1	7	6	5	1	7	1	6	1	2	3	4	2	1	3	2	2	2	2	3	4	2	1	4	3	3	7
3	5	5	5	3	6	5	3	5	7	2	5	5	5	5	2	2	2	5	2	5	2	5	2	4	4	4	4	1	3	3	2	1	4	4	1	2	3	3	3	5
3	3	5	5	2	9	6	9	5	9	5	4	5	4	5	3	2	1	5	1	5	5	5	1	4	3	3	2	2	3	4	4	2	3	4	2	1	4	2	3	6
3	2	4	5	5	9	5	9	5	2	5	5	5	5	5	6	4	3	5	4	4	7	5	2	1	4	2	1	2	2	1	1	2	1	2	1	2	2	2	2	4
3	7	9	5	9	9	6	9	4	3	2	5	5	2	5	3	3	1	5	2	4	2	5	4	2	4	4	4	4	4	4	3	2	2	1	3	3	4	3	3	1
3	1	1	9	1	1	9	1	1	1	1	9	9	1	9	1	1	2	1	1	1	9	1	1	1	4	2	1	3	1	3	2	3	3	3	2	2	2	2	3	4
3	6	8	5	5	9	5	7	5	8	5	5	5	7	5	7	5	5	5	5	3	6	5	3	4	3	3	3	3	3	3	4	3	4	3	3	2	4	4	3	6
3	9	8	5	5	9	5	9	1	9	7	3	3	2	6	8	9	3	4	3	5	7	5	3	2	3	3	1	4	2	2	1	1	3	3	2	3	4	4	2	3
3	9	9	1	9	9	1	9	9	9	5	1	1	9	1	9	9	9	1	9	1	9	1	3	2	4	4	4	4	4	4	4	4	2	4	4	4	4	1	4	2
3	1	7	6	5	8	5	7	5	1	3	6	5	3	5	5	5	5	5	1	7	5	5	1	2	3	2	2	1	3	2	2	1	3	2	2	2	2	3	2	5
3	2	7	5	8	8	5	6	6	1	5	6	5	7	5	7	3	1	3	2	5	3	5	2	2	3	3	3	2	2	2	3	3	3	3	3	2	2	3	3	4
3	7	5	5	5	9	5	6	5	3	5	5	5	7	5	7	5	5	1	1	5	5	5	2	1	4	1	1	4	1	2	1	1	1	1	1	3	3	3	2	3
3	3	5	5	5	3	5	7	1	3	5	5	5	5	5	3	7	2	5	7	3	7	5	1	2	2	1	2	1	2	3	2	1	2	4	2	2	3	3	2	6
3	6	5	6	6	5	5	7	8	5	5	5	5	4	7	6	6	5	4	5	4	5	6	4	2	2	3	3	2	4	4	3	1	3	3	4	4	1	3	3	6
3	6	6	4	4	7	5	6	4	4	4	5	4	6	5	6	4	6	3	6	5	3	5	2	3	3	2	3	2	2	1	2	3	3	2	2	1	3	4	2	4
3	3	5	5	5	2	5	8	6	2	5	5	5	5	5	5	5	5	5	5	5	5	5	3	2	2	3	2	1	3	4	4	2	2	2	4	3	2	2	3	4
3	4	4	5	5	7	5	7	5	3	5	5	5	5	5	5	5	7	5	7	5	5	5	1	3	2	1	2	3	2	2	4	2	4	3	1	2	1	3	2	1
3	7	7	5	7	7	5	7	5	5	3	5	5	7	5	3	3	3	5	7	5	7	5	2	3	2	2	1	1	2	2	2	2	3	3	2	1	3	3	2	5
3	7	7	5	7	8	6	8	4	3	5	6	6	6	6	6	6	4	3	3	6	6	5	3	3	3	3	3	3	2	2	4	3	4	4	3	2	4	2	3	7
3	3	5	5	5	3	5	5	5	3	3	6	6	5	6	3	3	2	5	2	6	2	5	4	2	2	4	4	2	3	2	2	2	2	2	2	2	2	3	3	2
3	5	5	5	5	7	5	5	6	3	3	5	5	5	5	7	5	3	5	5	5	5	5	2	2	3	2	3	1	3	3	1	2	3	2	3	3	2	3	2	3
3	3	5	5	5	5	7	5	5	3	5	5	5	5	5	5	4	5	5	3	5	5	7	1	4	1	1	1	1	1	1	1	1	4	3	1	1	3	3	1	4
3	5	5	5	5	7	5	3	7	5	5	7	9	8	8	7	5	5	5	5	6	5	5	4	3	4	3	3	1	4	3	4	1	3	3	4	3	4	2	4	4
3	7	7	6	7	8	6	6	5	6	5	8	5	7	5	6	5	5	5	7	6	5	5	2	3	3	2	3	3	2	2	2	3	3	2	2	2	4	3	2	5
3	8	8	5	7	9	5	8	5	8	5	5	5	5	5	8	8	8	5	8	7	7	5	3	3	4	3	3	4	3	2	2	2	3	2	2	2	4	3	3	6
3	7	4	4	6	8	4	7	8	4	4	5	5	4	4	6	5	4	4	4	3	6	4	3	3	3	2	3	2	3	2	2	2	3	3	2	2	4	3	2	3
3	5	5	5	5	6	6	5	5	5	5	5	5	5	5	7	6	6	5	5	5	6	6	3	3	3	1	3	3	2	2	1	1	3	2	1	2	3	3	2	5
3	7	5	5	5	5	7	5	5	6	5	5	5	5	5	5	5	5	5	5	5	5	7	2	3	1	2	2	2	2	1	1	3	4	4	2	2	4	3	2	6
3	1	1	5	5	1	5	5	5	1	1	5	5	2	5	1	1	1	5	1	5	1	5	2	3	1	1	3	1	1	1	1	1	3	1	4	4	1	4	1	8
3	5	5	5	5	9	5	5	5	6	4	5	5	5	5	4	3	1	5	5	5	3	5	2	4	4	2	1	1	2	2	1	1	4	2	4	1	4	1	3	6
3	6	6	5	5	9	8	6	1	3	5	5	5	6	6	9	5	5	5	1	4	8	5	3	2	3	2	3	2	2	1	1	2	1	1	2	2	2	2	2	5
3	3	3	5	3	9	7	9	7	7	7	5	5	5	6	3	3	5	6	9	5	9	5	3	2	4	1	2	2	2	2	2	2	2	2	2	2	1	3	2	4
3	4	5	5	5	7	6	2	8	2	2	6	6	5	6	7	2	2	5	2	7	5	7	3	2	3	2	2	2	3	1	1	2	2	2	1	1	1	4	3	2
3	2	2	5	4	7	6	3	5	3	5	6	6	6	6	4	3	3	5	3	6	3	6	3	2	3	2	3	1	3	2	2	2	2	2	2	2	3	3	2	3
3	7	7	4	5	7	4	8	6	6	5	5	5	4	4	4	6	4	6	6	6	5	5	4	1	3	3	3	3	3	2	3	2	3	3	4	3	2	2	4	3
3	6	6	5	5	8	6	4	4	6	4	5	5	5	5	2	5	4	5	5	6	5	6	3	3	3	1	2	2	3	2	2	1	3	2	2	2	3	2	2	4
3	7	7	5	6	9	6	8	4	6	2	5	5	7	5	7	7	8	5	3	5	6	5	3	2	4	2	3	3	3	2	1	3	3	3	2	2	2	2	2	2
3	1	5	5	5	7	5	6	2	1	4	5	5	7	5	3	1	1	5	3	5	6	5	2	1	3	1	2	1	2	1	1	4	3	1	1	2	4	1	2	2
3	7	1	5	1	7	5	6	1	1	5	5	5	5	5	1	1	1	5	5	5	3	5	3	1	2	1	3	1	3	1	1	2	3	2	1	2	2	3	2	4
3	6	5	5	5	5	7	6	7	6	5	6	6	6	7	5	5	5	7	5	6	6	6	3	1	1	2	2	2	1	2	1	1	4	3	1	2	4	4	2	6
3	5	5	2	5	4	7	5	7	5	5	6	5	5	7	5	5	5	5	3	6	5	7	2	2	2	3	3	2	2	2	3	1	2	3	4	3	4	1	3	5
3	5	5	5	5	7	5	5	4	5	5	5	5	5	5	5	5	5	5	5	5	5	5	1	3	2	2	1	1	2	2	1	1	1	4	1	1	4	3	1	6
3	9	9	5	9	9	5	5	5	5	1	5	5	5	1	5	6	1	1	6	4	5	6	2	4	3	3	3	3	3	2	2	2	3	1	2	2	3	4	4	4
3	3	5	5	5	6	6	3	3	3	5	5	5	4	6	3	3	2	6	4	4	4	5	3	2	1	2	3	1	2	2	2	1	2	1	2	2	3	2	3	3
3	3	3	8	4	2	9	3	8	2	4	8	9	8	6	2	3	2	7	4	6	2	7	2	2	1	3	3	3	2	4	3	2	3	3	2	1	4	2	2	4
3	6	6	5	6	7	7	6	3	3	3	7	7	5	6	4	4	4	6	6	4	4	7	3	1	3	1	3	3	1	3	3	2	1	1	2	2	3	2	2	5
3	5	5	8	3	9	5	5	8	7	6	3	7	7	5	7	7	7	5	7	5	7	5	3	3	4	2	3	3	3	2	3	3	4	4	3	2	4	3	2	5
3	9	9	7	9	9	6	9	9	9	9	4	5	5	7	9	8	9	6	9	4	8	5	3	2	4	4	3	4	3	3	3	4	2	2	3	3	2	2	4	4
3	1	1	5	4	2	7	3	5	3	5	7	7	5	5	2	1	1	5	2	5	2	6	2	3	1	1	3	1	1	3	2	2	3	3	2	2	3	3	2	3
3	9	8	1	8	7	1	9	8	8	8	1	5	3	1	8	9	8	1	8	5	8	5	4	2	4	3	4	4	3	2	2	3	3	3	2	1	3	1	4	5
3	6	6	5	2	8	6	4	2	2	3	7	5	3	4	1	2	1	4	8	5	6	7	2	3	3	2	1	3	3	2	1	1	3	2	1	2	3	3	1	4
3	8	3	8	1	1	7	1	1	1	1	1	5	5	7	5	1	1	5	5	5	1	5	1	3	1	1	1	1	2	1	1	1	4	4	2	2	1	3	2	6
3	5	5	5	5	6	5	5	5	6	5	5	5	5	5	5	5	5	5	5	5	5	5	1	1	1	4	1	1	1	1	1	1	4	1	4	1	4	4	1	7
3	5	5	5	5	5	5	5	5	5	5	6	6	6	6	5	5	5	5	5	7	5	7	1	1	1	1	1	1	1	1	1	1	1	1	1	3	3	4	1	7
3	2	3	5	3	6	5	8	7	1	5	5	5	5	6	6	7	1	7	1	5	5	7	2	1	3	2	4	1	4	2	4	1	1	1	2	2	1	2	3	3
3	5	5	6	5	9	5	8	6	5	3	5	4	5	5	2	1	3	5	5	3	5	5	1	3	4	2	2	1	2	2	1	1	3	4	2	2	3	3	1	4
3	7	7	5	5	9	5	7	4	6	5	4	5	5	5	8	4	1	5	2	5	5	5	3	3	4	1	1	4	3	1	1	1	3	3	2	1	2	3	1	4
3	9	9	8	7	9	9	7	8	9	5	6	6	6	6	5	4	3	5	7	5	4	8	4	1	4	4	4	4	4	4	4	3	3	1	3	2	3	2	4	2
3	2	6	6	7	1	5	7	2	1	1	7	6	2	7	6	5	6	8	6	8	2	9	3	1	1	1	2	2	2	4	1	4	1	1	3	3	1	1	3	1
3	1	1	5	5	1	5	1	5	1	1	5	5	5	5	5	1	1	1	1	5	1	5	1	1	1	1	1	1	1	1	3	1	4	4	2	2	1	4	2	7
3	9	9	9	9	9	9	9	9	9	9	9	9	9	9	9	9	9	4	4	5	9	9	4	1	4	4	4	4	4	4	4	4	1	1	4	4	2	2	4	1
3	2	3	5	5	2	5	2	2	1	5	5	5	2	7	5	5	2	5	2	5	2	5	1	1	1	1	2	1	1	3	2	1	1	2	2	2	2	3	2	4
3	4	3	5	5	7	6	5	1	5	5	6	6	5	7	4	1	3	5	4	7	5	7	2	1	3	3	3	1	2	2	2	1	4	4	2	2	3	2	2	5
3	8	8	5	8	9	7	7	3	7	5	5	5	9	5	7	6	7	4	8	2	8	5	3	1	4	4	3	3	2	2	4	4	3	3	2	1	2	2	3	3
3	3	7	5	7	7	6	8	7	1	7	5	5	6	5	6	5	1	5	1	3	7	5	4	1	3	3	3	1	3	2	3	2	2	2	3	2	3	3	3	5
3	7	5	5	5	7	5	6	5	6	5	5	5	4	5	7	6	3	5	5	2	4	5	1	2	3	3	1	3	3	1	1	1	3	3	1	2	3	2	1	3
3	5	5	5	5	6	5	5	3	5	5	5	5	4	5	3	5	5	5	5	6	5	5	2	4	2	2	1	1	1	1	1	1	4	2	2	2	3	2	2	5
3	5	5	5	5	5	5	5	5	5	5	5	5	5	5	5	5	5	5	5	5	5	5	1	1	2	1	1	1	1	1	1	1	1	1	1	2	1	1	1	1
3	1	2	5	6	7	5	7	5	4	5	5	5	5	5	5	3	1	4	1	2	5	5	3	3	4	2	3	3	2	2	1	2	3	3	2	2	1	2	3	5
3	5	6	7	3	3	7	6	3	3	3	7	5	6	6	5	5	3	7	5	3	3	7	3	2	2	2	3	2	3	4	2	2	3	2	3	3	3	3	2	3
3	5	5	5	5	7	5	5	5	5	5	5	5	7	5	3	5	5	5	5	5	5	5	2	2	3	2	2	2	2	2	2	2	3	2	2	2	2	3	2	4
3	6	5	5	5	7	9	5	7	3	5	7	9	8	7	6	5	5	8	1	7	5	9	4	3	4	4	4	2	4	4	4	2	2	2	4	3	3	3	3	2
3	3	4	5	3	7	5	4	4	3	5	5	5	5	5	5	4	2	5	3	5	2	7	2	2	2	1	2	2	2	1	1	1	2	2	1	2	3	3	2	1
3	2	3	5	3	8	6	6	5	4	4	5	5	4	6	9	2	1	5	4	5	3	6	2	2	4	2	3	2	2	2	1	3	3	1	3	3	3	3	2	6
3	2	2	5	5	6	7	5	5	5	2	7	7	5	8	3	5	2	8	5	7	5	7	2	2	2	2	2	2	3	2	2	2	3	3	2	2	3	3	2	5
3	3	7	5	7	9	6	7	3	2	4	5	5	7	6	7	3	2	3	7	2	6	6	3	3	4	2	3	2	3	2	3	3	2	2	3	2	3	2	3	3
3	7	6	5	6	7	5	6	4	6	3	5	5	5	5	7	4	2	5	4	3	6	5	2	2	3	1	2	3	2	2	1	2	2	2	2	1	2	3	2	3
3	3	7	5	7	9	6	7	3	2	4	5	5	7	6	7	3	2	3	7	2	6	6	3	3	4	2	3	2	3	2	3	3	2	2	3	2	3	2	3	3
3	3	5	7	3	7	7	3	3	1	3	5	5	3	5	3	1	3	7	1	7	3	6	2	2	3	1	2	1	3	2	2	2	3	2	2	2	3	3	3	5
3	7	7	7	5	8	7	8	5	7	7	5	7	5	7	6	4	4	5	5	7	4	7	2	1	4	3	3	2	3	3	2	3	3	1	2	2	3	2	3	4
3	3	6	5	5	9	5	6	4	8	5	5	5	5	5	4	4	5	5	6	5	6	5	2	3	4	2	2	1	3	2	1	1	3	1	1	2	4	2	3	3
3	4	7	5	5	3	5	6	5	5	5	5	5	5	5	3	5	3	5	3	5	5	6	1	3	2	3	3	2	2	3	3	1	2	3	3	2	1	2	3	5
3	5	5	5	5	7	5	5	5	5	5	5	5	5	5	5	5	5	6	5	6	5	6	2	3	3	2	2	1	2	2	2	1	3	1	1	2	2	1	2	6
3	8	8	4	8	9	4	8	8	8	8	6	5	5	4	7	7	4	3	8	4	8	4	3	2	4	2	2	3	2	3	2	2	2	4	3	2	3	4	2	4
3	3	5	7	5	7	6	4	5	3	5	5	7	4	6	7	3	3	1	3	6	5	6	3	2	3	2	2	1	3	2	2	1	3	2	2	2	3	2	2	3
3	9	9	6	6	9	6	9	9	9	7	3	4	5	2	8	7	9	5	5	3	8	6	3	1	4	4	4	4	3	4	3	3	3	1	2	3	3	2	2	3
3	8	6	4	7	9	5	7	6	9	3	5	4	5	5	5	3	1	5	6	5	4	4	3	2	3	2	2	3	2	2	2	2	1	1	1	2	2	3	2	3
3	4	7	7	6	9	7	4	5	9	2	5	7	9	5	3	4	4	6	1	4	1	5	3	3	3	1	2	2	3	2	2	4	3	1	2	3	2	3	2	2
3	5	5	5	5	3	5	5	5	5	5	5	5	5	5	3	5	5	3	3	4	4	5	3	1	3	1	4	2	3	4	4	1	2	3	3	2	4	3	3	2
3	5	5	5	7	8	1	8	5	7	1	8	1	1	1	1	1	1	9	5	5	7	9	3	3	4	4	2	1	4	3	1	1	2	2	1	2	4	3	2	3
3	2	2	5	2	4	6	3	3	3	3	8	7	3	7	6	4	7	5	7	5	6	6	3	2	4	2	3	3	3	3	2	3	2	2	2	2	3	2	2	3
3	9	9	1	9	9	1	9	9	9	5	5	5	9	5	9	9	5	1	9	1	9	5	4	4	4	3	4	4	3	4	4	2	2	1	4	4	3	3	3	3
3	7	7	2	4	8	5	7	6	8	3	6	6	6	5	3	2	3	3	1	7	1	7	2	3	4	3	3	4	3	4	3	4	4	4	3	3	3	2	3	5
3	9	8	5	9	9	5	9	9	9	1	5	5	5	5	7	2	1	5	5	5	6	9	4	3	3	2	3	4	4	2	2	2	2	2	3	2	2	3	3	2
3	6	5	5	3	4	5	5	5	5	4	5	5	6	5	3	2	2	6	3	5	6	5	2	1	2	2	2	3	2	1	3	3	1	1	2	2	1	1	2	1
3	2	3	5	6	7	4	6	4	7	3	6	5	4	6	6	4	3	6	3	5	6	5	2	3	3	2	2	2	3	1	1	3	3	3	2	2	3	3	2	5
3	7	6	7	5	7	7	6	6	7	5	7	7	5	7	7	7	4	7	7	5	7	7	2	3	4	3	3	3	3	2	2	2	2	2	1	2	3	3	3	5
3	7	6	7	5	7	7	6	6	7	5	7	7	5	7	7	7	4	7	7	5	7	7	2	3	4	3	3	3	3	2	2	2	2	2	1	2	3	3	3	5
3	9	9	5	9	9	9	5	7	9	5	7	7	7	7	7	7	7	9	5	5	9	9	3	4	4	3	4	4	3	3	2	3	3	3	3	3	2	2	3	5
3	5	7	5	5	3	5	3	5	5	5	7	5	7	5	2	9	1	5	9	1	5	5	3	3	3	1	3	3	2	1	1	1	3	3	1	1	3	3	2	5
3	9	6	5	6	9	5	9	1	9	5	5	5	9	5	4	3	4	5	9	4	6	4	3	1	4	3	3	4	3	4	2	4	2	1	2	2	3	2	2	4
3	2	3	9	5	9	8	6	9	6	9	5	9	6	9	9	1	5	6	1	6	6	9	3	1	2	3	3	1	4	4	1	1	2	2	1	2	3	1	3	3
3	2	5	5	5	1	5	5	1	1	2	5	5	2	5	2	1	6	5	1	5	5	5	1	2	1	1	2	2	2	2	1	2	1	1	1	1	4	2	1	2
3	5	5	5	5	7	5	5	5	5	5	4	5	3	5	6	3	5	5	5	5	5	5	2	3	3	1	1	2	2	1	1	1	3	3	1	2	3	4	1	5
3	2	5	5	5	1	5	5	1	1	2	5	5	2	5	2	1	6	5	1	5	5	5	1	2	1	1	2	2	2	2	1	2	1	1	1	1	4	2	1	2
3	3	3	5	3	3	5	5	5	3	5	5	5	5	5	3	3	3	5	5	5	5	5	1	1	1	1	1	1	1	1	1	1	1	1	1	2	1	3	1	1
3	7	7	5	8	7	6	7	7	8	4	5	5	7	6	6	7	6	6	7	5	7	6	2	3	4	3	2	4	3	3	4	4	3	2	3	3	2	3	4	5
3	1	3	5	4	8	7	6	5	2	5	7	7	5	6	6	3	1	5	3	6	1	8	3	3	4	3	2	2	2	3	2	2	3	2	2	2	3	3	3	3
3	5	9	5	9	9	7	9	9	9	4	7	7	5	5	9	5	5	5	5	4	5	5	4	1	4	4	4	4	4	4	4	2	1	2	4	4	3	2	4	3
3	3	7	5	5	6	5	5	5	4	5	5	5	5	5	5	5	5	5	3	5	5	5	2	2	2	2	2	2	2	2	2	2	2	3	2	1	3	3	2	7
3	7	5	5	1	9	7	3	3	6	1	5	5	7	5	3	1	1	5	9	5	1	7	1	3	4	2	2	3	1	2	4	2	3	2	1	2	2	3	2	4
3	4	7	7	9	1	9	9	9	1	5	5	5	5	5	1	9	5	5	5	5	9	5	1	3	3	2	1	1	2	3	4	3	3	1	3	3	3	1	2	7
3	1	1	7	1	4	8	1	6	1	6	3	7	1	8	3	1	1	1	1	1	1	1	2	1	3	2	2	1	2	2	2	2	2	1	2	2	3	2	3	5
3	3	3	5	4	7	7	5	2	2	3	7	5	6	5	2	4	4	5	5	6	7	5	3	1	3	1	3	2	3	2	3	2	1	1	3	2	4	3	3	4
3	3	5	5	5	8	8	7	5	3	5	6	5	7	6	7	7	6	5	4	6	5	5	3	2	3	3	3	3	3	2	2	1	2	3	3	2	2	2	3	4
3	1	1	7	6	4	5	6	4	2	5	6	5	4	5	4	4	3	5	1	7	1	7	2	4	2	1	1	1	2	1	1	2	3	4	1	1	4	4	2	7
3	9	9	5	5	9	5	9	5	9	5	5	5	5	5	7	6	3	9	9	5	5	5	3	1	4	3	3	4	3	2	2	3	2	1	2	2	2	2	3	3
3	6	4	5	5	8	7	9	5	6	1	6	5	5	5	7	7	1	5	6	6	3	7	3	2	3	2	1	4	3	2	2	1	3	3	2	2	2	3	3	5
3	6	4	5	5	8	7	9	5	6	1	6	5	5	5	7	7	1	5	6	6	3	7	3	2	3	2	1	4	3	2	2	1	3	3	2	2	2	3	3	5
3	7	6	2	7	9	5	8	5	6	1	5	1	5	1	9	8	1	2	9	5	9	5	3	3	4	3	2	3	3	3	2	2	3	4	3	2	3	3	2	5
3	7	7	5	7	9	5	7	6	8	5	5	5	5	5	9	9	6	5	9	5	9	5	3	2	4	3	3	4	3	3	2	3	2	1	2	2	2	3	2	4
3	4	3	6	2	7	5	5	9	2	3	4	5	7	5	6	3	3	4	7	4	5	4	3	2	3	2	2	3	3	2	3	2	3	3	2	2	4	3	3	4
3	8	8	2	7	9	4	8	9	9	9	5	1	9	2	8	3	2	9	9	5	2	9	3	2	3	3	3	3	3	2	3	2	2	2	4	3	2	2	4	2
3	5	5	5	5	5	5	5	5	5	5	5	5	5	5	5	3	5	5	3	5	5	5	2	1	2	2	3	1	2	1	1	1	1	1	1	1	2	4	2	1
3	9	9	5	9	9	5	9	9	9	9	1	5	1	5	9	9	9	3	9	1	9	5	4	4	4	4	4	4	4	2	2	4	3	3	2	1	4	3	4	7
3	4	5	5	5	5	6	6	4	6	4	7	6	5	6	5	5	5	6	5	5	5	6	2	2	1	3	3	1	2	1	3	1	3	2	1	2	2	3	3	4
3	7	7	7	7	1	5	7	5	1	1	5	5	5	5	1	1	1	1	9	1	1	5	2	1	4	1	2	4	1	1	1	1	1	1	1	2	1	2	1	1
3	6	6	5	5	1	6	3	3	7	2	5	5	5	5	2	3	1	5	5	7	6	6	2	3	3	3	3	2	3	2	2	1	4	4	1	1	4	1	2	2
3	5	5	5	5	5	5	5	5	5	5	5	5	5	5	5	5	5	5	5	5	5	5	2	4	3	3	3	4	2	4	3	3	4	1	1	2	3	3	2	1
3	8	8	5	9	9	7	9	9	9	5	3	3	5	7	9	8	7	5	7	2	5	7	3	1	4	2	2	4	3	1	2	4	2	1	2	2	3	2	3	2
3	4	4	6	4	7	6	4	4	4	7	5	6	5	6	4	1	4	7	4	6	4	6	2	2	3	2	2	2	1	1	2	1	3	1	1	1	3	3	1	2
3	6	5	5	6	7	6	6	5	6	5	5	5	6	5	7	6	5	5	5	6	6	5	2	3	3	1	2	3	3	2	1	2	3	3	2	2	4	3	2	4
3	3	6	5	5	7	5	6	5	7	5	7	6	5	6	2	5	2	5	5	7	5	5	3	3	3	3	4	2	3	3	2	2	2	3	3	2	3	3	3	3
3	6	6	5	7	9	5	9	9	9	1	6	6	9	5	6	1	1	5	1	6	1	6	2	3	4	3	3	3	2	2	3	2	2	3	2	3	3	3	3	4
3	6	5	5	5	7	5	5	3	3	5	5	5	5	5	4	3	3	6	2	5	5	5	2	3	4	1	2	3	1	1	1	1	2	3	2	3	2	2	2	4
3	7	5	5	5	8	5	6	3	4	5	5	5	5	5	4	5	4	5	4	5	3	5	2	1	3	2	2	2	1	1	1	1	1	1	1	2	2	2	1	3
3	5	4	5	5	6	6	5	5	5	5	6	6	4	5	5	5	5	5	5	5	5	5	3	3	3	2	2	3	2	1	1	2	3	3	2	2	4	3	2	5
3	5	5	5	5	5	7	5	3	5	5	5	7	5	6	5	4	4	6	3	5	3	5	2	2	1	2	3	1	2	2	3	1	1	1	2	1	2	3	3	5
3	7	5	7	3	7	7	7	4	7	1	8	8	8	6	1	3	1	5	5	3	7	8	4	1	3	4	3	3	3	3	4	2	1	1	3	2	2	2	3	2
3	7	5	7	3	7	7	7	4	7	1	8	8	8	6	1	3	1	5	5	3	7	8	4	1	3	4	3	3	3	3	4	2	1	1	3	2	2	2	3	2
3	7	7	4	7	9	6	3	5	1	5	7	6	3	6	3	1	1	8	3	6	7	6	4	2	4	4	4	3	3	4	4	4	2	1	3	2	2	3	3	3
3	6	5	5	5	8	7	5	6	7	5	6	6	7	5	5	5	5	6	7	5	5	5	3	2	3	1	3	3	2	2	4	2	3	2	2	2	4	2	2	4
3	7	7	5	5	6	5	6	6	7	5	5	5	6	5	6	4	4	5	6	6	5	5	3	2	4	2	3	3	2	2	2	2	3	2	2	2	2	1	1	4
3	6	7	5	5	9	9	5	4	6	3	1	1	9	6	9	1	1	1	1	9	1	5	3	3	4	2	4	4	4	4	3	2	4	3	3	2	4	3	3	5
3	5	2	5	5	6	5	6	3	2	3	5	5	5	5	3	5	7	3	5	5	5	6	2	2	3	2	2	2	2	1	1	2	3	1	1	2	3	1	2	4
3	3	3	2	2	6	5	5	5	5	5	5	5	5	5	6	5	2	5	1	6	5	5	2	4	3	2	1	2	2	2	2	2	4	2	1	2	1	4	2	5
3	7	5	5	5	8	5	7	5	7	5	5	5	7	5	8	6	6	5	7	5	5	5	2	3	4	3	3	3	2	3	2	3	3	2	1	2	3	3	2	4
3	8	7	5	5	7	8	8	5	5	5	5	5	5	6	4	4	5	5	5	4	5	5	3	2	3	4	3	3	3	2	2	2	2	2	4	2	3	1	4	3
3	1	5	5	5	9	5	9	9	5	1	5	5	5	5	9	4	1	2	1	5	9	3	4	2	4	4	4	1	4	4	4	1	3	3	4	4	4	2	3	2
3	7	7	5	3	7	5	8	5	6	5	5	5	3	4	4	2	4	5	3	7	5	6	3	3	3	2	3	3	1	1	1	2	3	3	2	3	4	4	1	4
3	9	5	5	5	9	5	5	9	9	5	5	5	4	5	4	3	3	8	3	5	5	5	1	1	1	2	1	3	1	1	1	2	3	3	1	2	3	3	2	4
3	9	8	3	8	8	1	8	6	6	5	2	7	7	2	8	3	3	1	2	2	2	5	3	2	4	3	3	3	4	3	2	2	3	4	2	3	4	4	2	7
3	9	7	5	7	9	5	9	5	7	7	5	5	7	5	9	9	9	5	9	5	9	5	3	2	4	3	3	3	3	3	3	3	3	3	2	2	3	3	3	4
3	2	5	5	5	2	5	5	5	5	5	5	5	5	5	4	4	1	5	3	4	5	5	3	1	1	2	3	1	3	2	3	1	2	2	3	3	3	1	1	3
3	7	7	5	5	8	5	9	7	7	5	5	5	5	5	7	3	1	5	7	4	7	5	1	2	3	3	3	4	2	1	3	4	4	4	2	1	3	3	3	4
3	1	3	6	5	1	6	4	3	1	3	7	6	5	6	3	1	1	5	6	6	5	6	3	1	1	2	3	2	3	3	2	2	1	2	1	2	1	2	2	2
3	6	6	3	6	6	3	6	6	4	3	3	3	3	3	6	5	3	3	5	5	6	5	3	3	3	1	3	3	3	2	1	2	3	3	2	2	3	3	2	4
3	5	5	5	5	6	5	5	5	5	5	5	5	5	5	5	5	5	5	4	5	5	5	1	1	2	1	2	2	1	1	1	1	1	1	1	2	2	3	1	1
3	1	1	5	5	1	9	1	5	1	1	9	9	5	8	3	1	1	8	1	8	1	8	2	2	3	4	4	2	4	2	1	1	2	1	1	2	3	3	2	4
3	5	5	5	5	6	5	6	6	6	5	4	5	4	6	5	5	6	5	6	6	6	5	2	2	4	3	2	4	1	2	3	2	3	3	3	4	2	3	3	6
3	5	5	5	5	5	7	5	5	5	5	5	5	3	5	5	3	2	5	2	5	5	7	1	2	1	1	1	1	1	1	2	2	3	2	1	2	3	2	2	3
3	4	4	5	7	9	5	7	4	4	5	5	5	3	5	5	5	5	5	7	2	5	5	2	1	3	1	3	3	3	1	1	3	2	1	4	2	3	3	2	6
3	9	9	5	5	9	5	6	4	9	4	7	5	7	5	9	5	5	5	8	5	7	5	1	1	4	3	4	4	4	1	2	3	1	1	1	2	2	2	4	1
3	6	6	5	6	6	6	5	6	6	5	6	5	6	5	6	3	3	5	6	6	5	5	2	1	3	4	2	3	2	1	2	1	2	1	2	3	1	2	2	2
3	3	3	5	5	4	7	3	7	4	5	5	5	5	5	3	5	4	7	4	5	4	5	3	1	2	2	3	2	3	3	3	2	1	1	2	2	3	3	1	4
3	2	5	3	5	8	5	6	5	1	5	5	5	7	5	5	3	3	5	2	2	2	5	2	1	4	3	1	3	1	2	1	2	1	2	1	2	3	1	3	4
3	7	5	5	5	3	6	4	7	5	2	5	5	5	5	7	3	3	5	6	5	5	6	2	3	3	2	2	3	2	3	3	4	4	1	2	2	4	4	2	3
3	7	6	5	5	8	6	6	4	6	7	5	6	7	6	6	6	5	5	5	6	2	6	2	3	3	2	1	3	2	2	2	3	3	3	3	2	2	3	4	5
3	1	3	5	3	8	5	7	3	3	3	5	5	5	5	3	3	3	5	5	5	5	5	2	1	3	2	2	1	2	2	1	2	2	1	1	1	3	3	2	6
3	6	5	5	5	7	5	5	3	3	5	5	5	6	5	5	5	2	5	2	5	5	6	3	3	2	3	3	1	3	2	3	1	4	3	2	2	4	3	2	6
3	5	4	4	4	2	2	7	8	3	6	2	1	1	1	2	2	5	5	5	5	6	6	2	3	1	1	1	1	2	2	2	1	3	4	2	1	4	2	1	4
3	4	4	5	6	6	5	3	3	4	2	6	6	6	6	4	6	2	3	6	3	4	6	2	2	2	1	3	1	2	1	1	2	2	1	2	2	2	2	2	2
3	1	7	5	5	9	7	7	5	1	3	5	5	9	6	9	5	1	5	1	5	5	5	2	2	4	4	2	4	1	1	2	4	3	2	1	1	4	2	2	1
3	9	7	5	5	6	5	5	8	7	5	5	5	5	5	7	9	9	5	5	5	6	5	3	4	3	1	1	4	3	1	1	1	3	1	1	2	3	4	2	4
3	3	3	5	4	6	6	6	2	2	1	7	5	6	4	2	2	1	5	2	6	3	7	3	1	2	2	4	1	3	2	2	2	2	2	2	2	1	2	3	3
3	7	7	5	7	8	5	7	7	7	6	5	5	6	5	7	7	7	5	5	4	5	5	2	3	3	3	3	3	3	2	3	2	3	2	2	2	4	4	3	6
3	6	2	5	5	9	3	1	1	1	1	5	5	4	6	3	1	1	5	5	5	5	6	4	2	3	3	4	4	3	2	1	2	3	2	2	3	3	4	3	2
3	5	5	6	5	1	7	5	3	4	5	8	7	4	5	1	1	1	5	1	6	5	7	2	1	1	1	2	1	3	1	1	1	1	1	1	1	2	4	2	3
3	7	7	5	6	9	5	6	6	7	5	5	5	7	5	9	6	6	5	6	5	5	5	3	1	4	2	4	4	3	2	4	3	3	3	2	2	1	2	3	4
3	7	9	5	7	9	5	9	7	9	5	5	5	5	5	7	5	5	5	3	5	7	5	3	2	3	2	3	3	3	3	2	2	3	2	2	2	3	3	3	4
3	2	6	5	4	7	6	6	4	1	5	5	5	6	5	2	1	5	5	3	5	7	5	2	2	2	1	4	1	1	3	4	1	3	1	4	4	1	3	2	1
3	7	6	4	8	8	4	9	9	9	9	2	1	7	4	6	6	1	2	2	6	6	4	3	2	3	2	3	3	2	2	2	3	2	2	2	1	3	3	3	3
3	5	5	6	7	7	6	4	1	1	5	5	7	6	6	9	9	1	1	5	5	1	7	1	3	4	1	1	1	2	4	1	2	4	2	1	2	2	2	1	5
3	1	5	5	2	1	5	5	1	1	5	5	5	5	5	1	1	1	5	2	5	5	5	4	2	1	1	1	1	1	2	1	1	1	2	1	1	1	2	1	2
3	3	5	6	6	9	6	8	7	2	1	6	5	8	5	8	2	1	1	1	5	5	5	1	2	4	4	3	1	2	1	1	3	3	2	1	2	3	4	4	5
3	1	1	7	1	5	5	5	6	6	6	3	1	5	5	1	3	1	5	1	2	1	5	2	4	4	3	1	4	3	1	1	4	4	4	2	1	3	4	2	5
3	9	9	5	3	9	9	9	5	9	1	5	5	7	5	1	1	1	1	1	5	9	7	3	3	4	2	3	4	3	2	4	4	4	2	2	2	2	4	3	5
3	5	4	6	4	4	7	7	5	4	3	6	5	6	7	2	4	3	7	5	6	5	7	2	1	2	2	1	1	2	1	1	1	1	1	1	1	2	3	1	3
3	9	5	5	5	9	5	5	9	9	5	5	5	4	5	4	3	3	8	3	5	5	5	1	1	1	2	1	3	1	1	1	2	3	3	1	2	3	3	2	4
3	3	3	5	5	6	5	6	5	5	6	5	5	7	6	6	5	3	6	3	7	3	6	2	2	2	2	3	2	3	3	2	2	3	3	3	3	3	3	2	5
3	3	3	3	6	6	3	5	5	5	5	3	5	5	3	3	4	6	5	5	5	6	3	4	4	2	2	4	3	3	1	2	1	4	2	1	1	4	3	3	3
3	4	3	7	9	4	6	9	8	4	7	5	5	7	5	9	9	4	4	1	6	1	6	3	2	3	4	3	3	3	2	4	4	1	2	3	2	4	3	4	2
3	8	7	5	5	9	5	9	5	9	5	6	5	6	5	9	8	8	5	5	5	5	5	2	4	4	3	2	4	2	1	2	1	4	1	1	3	3	3	3	4
3	5	6	5	7	8	5	7	5	7	5	5	7	6	6	5	5	1	3	2	6	4	5	2	3	3	1	2	2	2	1	4	3	3	3	2	3	3	1	2	7
3	2	2	5	5	8	5	5	8	3	5	5	6	4	6	9	4	2	5	5	3	5	5	4	3	4	4	2	1	2	2	3	1	3	2	2	2	4	2	2	5
3	3	3	5	5	7	5	3	6	1	4	6	5	5	5	4	5	3	5	5	6	5	5	1	1	3	2	2	3	1	1	1	2	1	2	2	2	3	1	1	3
3	5	4	5	6	8	6	6	6	6	1	5	6	6	4	6	1	1	6	1	4	5	6	3	2	3	3	3	3	2	2	2	3	2	2	3	3	3	3	3	3
3	7	7	6	7	9	9	8	7	8	6	5	5	6	6	7	7	7	4	6	5	7	7	3	2	4	4	4	3	4	2	4	3	2	2	3	2	3	2	4	5
3	5	5	5	5	1	7	5	4	5	5	6	5	5	6	3	5	5	5	5	2	5	7	2	1	1	1	1	1	3	3	2	1	1	4	2	2	4	1	1	1
3	9	9	5	3	9	9	9	5	9	1	5	5	7	5	1	1	1	1	1	5	9	7	3	3	4	2	3	4	3	2	4	4	4	2	2	2	2	4	3	5
3	5	5	6	5	5	7	5	5	5	5	7	6	5	7	5	5	5	5	5	5	5	7	2	3	1	1	2	1	3	1	1	1	3	2	1	2	3	2	1	6
3	6	6	1	6	7	1	5	5	6	5	5	5	4	1	1	1	1	1	1	6	1	7	2	3	2	1	2	2	2	4	2	2	3	2	2	2	3	3	2	4
3	7	5	5	5	7	6	5	5	7	5	5	5	5	5	7	3	2	3	8	5	7	5	2	3	3	2	2	4	1	3	1	1	3	1	2	2	4	3	2	5
3	6	4	5	5	6	5	6	4	3	5	5	6	5	5	6	4	3	6	3	5	5	5	1	1	2	1	2	2	2	2	3	1	1	1	2	3	1	2	1	3
3	6	6	2	2	6	5	6	6	6	1	4	5	6	3	5	4	5	9	3	7	9	6	1	2	3	2	2	2	2	1	3	2	2	2	2	2	3	3	2	3
3	7	7	5	4	8	6	6	4	5	3	7	5	9	6	4	2	2	4	4	7	3	6	3	2	4	3	3	3	4	2	3	4	2	2	2	2	2	3	3	4
3	1	2	5	1	3	8	2	3	2	4	5	5	5	4	2	1	4	7	1	5	6	7	3	3	3	2	4	1	3	2	2	1	3	4	2	1	3	3	1	4
3	7	5	5	5	9	5	6	4	6	5	5	6	4	5	6	5	6	5	4	5	6	5	3	2	4	4	3	4	2	2	4	2	1	2	2	1	3	3	3	4
3	5	5	5	5	9	5	5	6	6	5	5	5	5	5	9	9	9	5	9	5	5	5	3	2	3	3	2	3	2	2	3	2	2	2	3	3	2	3	3	6
3	1	5	7	5	9	7	2	5	3	5	5	5	5	5	5	3	2	7	2	5	3	6	2	3	3	1	2	1	1	3	2	1	1	3	3	2	4	2	1	6
3	1	6	5	6	8	5	3	6	1	7	5	5	5	5	7	5	2	5	4	6	5	7	3	1	3	2	1	1	2	2	1	1	4	3	2	3	4	3	2	4
3	1	1	5	1	3	5	5	5	2	2	5	5	5	5	1	1	1	2	2	5	2	5	1	3	1	1	1	1	1	2	1	1	4	3	1	2	4	4	1	4
3	5	5	5	5	6	5	6	5	5	5	6	5	4	5	5	5	5	5	5	5	5	5	2	2	2	2	3	2	2	2	2	1	2	2	1	2	3	2	1	3
3	5	5	5	5	7	5	5	4	4	4	6	5	7	5	6	4	3	4	4	5	4	5	2	3	3	2	2	2	2	2	3	2	3	3	2	2	3	3	2	5
3	7	4	5	4	7	5	7	1	4	7	5	5	6	5	1	1	1	5	5	2	5	5	2	1	4	2	1	4	3	1	2	3	1	1	2	2	1	3	3	1
3	5	5	5	5	5	5	5	5	5	5	5	5	5	5	5	5	5	5	5	5	5	5	1	1	1	1	1	1	1	1	1	1	3	1	1	1	2	3	1	5
3	3	5	5	5	8	6	8	3	4	5	6	5	5	5	7	4	5	5	8	5	3	7	3	3	4	1	2	3	3	2	3	3	4	3	2	3	4	2	2	5
3	9	9	5	3	9	9	9	3	7	2	9	5	9	5	5	5	5	8	9	6	9	5	3	2	4	4	4	4	4	4	3	4	2	2	3	4	3	3	4	3
3	4	5	4	3	9	5	7	5	7	3	5	5	5	5	1	3	1	5	5	4	4	5	2	1	3	3	2	2	2	2	2	2	1	1	1	1	3	3	3	2
3	2	7	5	9	9	4	9	9	9	9	4	6	4	5	9	9	5	1	7	6	1	6	2	3	3	3	3	3	2	2	3	2	4	4	1	3	4	3	3	6
3	6	6	4	6	8	5	7	6	6	5	5	5	6	5	7	6	4	5	5	5	5	5	3	2	3	3	3	3	3	2	2	3	2	2	2	2	3	3	3	4
3	7	6	7	7	7	5	5	9	8	3	4	5	9	7	5	1	1	9	9	7	5	7	4	3	3	1	3	3	4	2	1	2	3	1	2	1	1	3	3	1
3	1	1	7	1	1	7	1	1	2	1	5	5	5	7	1	1	1	5	1	7	5	5	2	1	1	3	3	1	1	3	1	1	2	1	1	2	3	3	1	4
3	9	7	5	8	9	5	8	9	9	5	5	3	9	1	9	9	5	2	8	2	7	6	3	2	4	4	4	4	2	3	3	4	2	4	3	3	3	1	4	5
3	9	9	5	5	9	5	9	4	9	3	5	5	7	5	9	5	5	5	6	4	5	5	2	1	4	3	3	4	2	4	3	4	3	2	3	3	3	3	2	5
3	5	5	5	5	5	6	5	3	5	5	6	6	5	6	5	5	5	5	5	6	5	6	2	1	1	1	1	1	2	1	3	1	1	3	1	1	3	2	1	2
3	6	5	5	5	8	5	5	3	5	5	5	5	5	5	3	3	3	4	1	2	5	5	2	1	2	2	1	2	1	1	1	1	1	2	1	1	1	4	2	3
3	5	5	5	5	5	5	5	6	5	5	5	5	4	5	4	5	5	5	5	6	4	6	3	3	3	3	2	2	2	1	2	1	4	3	1	2	4	3	2	5
3	6	3	8	2	7	9	2	5	6	4	8	9	2	7	5	5	5	6	6	5	6	6	1	2	2	1	2	2	1	1	1	1	4	3	1	2	4	4	1	7
3	3	3	5	2	4	6	2	2	3	5	6	6	4	5	2	3	3	5	4	3	2	6	2	1	1	1	2	2	3	2	1	1	2	2	1	2	2	2	1	3
3	5	6	5	5	6	5	7	4	4	3	5	5	5	5	3	3	1	5	6	5	5	5	2	4	2	2	2	2	1	1	2	1	4	2	1	2	3	3	2	5
3	9	9	6	9	9	7	9	3	9	4	6	6	6	7	9	9	1	4	5	6	3	6	4	3	3	3	3	4	3	3	4	3	2	3	3	3	3	2	3	4
3	5	5	5	3	6	5	7	9	3	5	3	7	5	4	5	5	5	5	4	5	3	6	2	1	2	1	1	1	3	2	2	1	2	3	2	2	3	3	2	4
3	3	4	5	5	3	5	5	5	1	3	5	6	5	5	2	1	3	2	3	5	2	5	1	2	1	2	1	1	2	2	1	1	2	2	1	1	1	3	1	3
3	9	9	1	6	9	1	1	1	1	6	6	5	5	4	7	7	1	1	1	4	7	7	2	3	4	4	3	4	3	3	3	3	4	2	3	3	4	4	4	6
3	5	6	4	5	5	4	5	5	6	2	4	4	5	6	4	4	2	2	2	5	5	5	2	4	2	1	1	2	2	1	1	1	3	2	2	1	1	3	2	3
3	8	8	6	7	9	9	6	5	7	5	7	6	8	6	8	6	5	5	5	8	5	9	3	2	4	3	3	3	3	3	3	4	2	3	3	3	3	2	3	4
3	1	1	5	5	6	8	5	8	6	1	8	5	5	8	1	1	1	1	1	7	1	8	3	2	2	1	3	1	3	2	4	2	3	1	3	3	4	3	1	3
3	4	6	5	6	9	6	6	3	3	2	5	5	5	5	7	2	2	6	7	8	6	5	3	3	3	3	3	2	3	2	2	2	3	3	3	2	3	2	3	3
3	2	2	5	2	2	5	2	5	1	5	5	5	5	5	5	3	5	5	5	5	2	5	2	3	1	1	1	1	3	1	2	1	3	4	1	1	2	3	1	2
3	3	1	6	5	8	7	2	1	2	2	9	8	5	7	7	5	2	1	1	5	5	7	2	2	3	2	1	2	1	1	1	1	2	2	1	1	3	3	3	6
3	5	5	5	4	1	9	9	7	7	8	3	1	8	8	5	5	5	5	5	5	5	9	3	2	1	1	3	1	3	1	1	1	3	3	1	2	4	3	1	8
3	2	2	6	5	5	8	4	2	2	3	6	6	5	6	3	3	2	6	1	5	5	7	2	3	1	1	1	1	2	2	1	1	3	3	1	2	3	2	2	4
3	8	7	2	7	8	8	3	2	2	1	5	5	1	8	1	1	1	1	1	8	1	8	4	3	3	2	3	3	4	4	4	3	4	4	2	2	4	4	4	5
3	7	7	3	5	6	5	5	8	3	5	5	4	5	5	6	4	5	5	5	2	3	6	3	2	2	1	1	3	2	1	1	3	2	1	1	2	2	2	2	1
3	6	6	6	5	7	6	7	5	5	7	5	5	5	7	8	5	5	5	5	5	5	7	2	2	3	2	1	1	1	1	3	1	2	2	1	2	2	2	3	1
3	8	8	5	1	3	5	2	1	8	1	5	5	5	5	1	1	1	5	3	5	5	5	3	1	2	2	3	4	3	2	1	1	4	2	2	1	3	1	3	3
3	5	5	5	5	5	5	5	5	5	3	5	5	5	5	5	3	1	5	5	5	5	5	1	4	1	1	1	1	1	1	1	1	3	1	1	1	4	2	1	4
3	5	5	5	5	5	5	5	5	5	5	6	5	5	5	5	5	5	5	5	6	5	6	3	2	1	1	3	1	1	2	1	1	3	2	1	3	3	4	3	2
3	1	1	6	5	8	5	3	3	1	6	5	5	6	5	7	2	3	5	1	5	4	6	1	2	3	3	3	1	2	2	2	2	2	3	2	2	3	2	2	3
3	6	5	5	5	6	5	5	5	6	5	5	5	6	5	5	3	5	5	4	4	5	5	3	3	2	2	1	1	2	1	1	1	3	1	1	3	3	3	2	3
3	5	6	5	4	7	6	6	5	6	5	6	5	5	5	7	4	3	5	5	6	6	6	2	1	3	2	3	2	1	2	3	2	4	3	2	2	3	3	3	5
3	6	4	4	5	6	5	6	7	6	3	5	6	6	5	3	4	4	5	6	5	4	6	1	3	2	1	4	3	3	1	2	2	4	4	1	2	4	1	1	6
3	4	1	5	5	8	6	5	9	5	5	5	5	1	7	4	4	7	1	1	1	9	4	4	4	4	3	4	2	4	3	3	4	2	3	3	3	1	3	3	2
3	3	5	5	5	3	5	6	4	6	5	5	5	5	5	6	2	3	5	3	5	4	4	1	1	2	2	2	2	3	1	1	2	1	1	2	2	1	1	2	1
3	1	1	1	1	1	5	1	1	1	1	5	5	5	5	1	1	1	5	1	6	1	5	2	1	2	1	1	1	1	1	1	1	3	2	1	1	3	1	1	4
3	5	5	5	5	5	5	5	5	5	5	5	5	5	5	5	5	5	5	5	5	5	5	1	3	1	1	1	1	1	1	1	1	1	2	2	2	2	1	2	1
3	6	5	5	5	6	5	5	5	6	5	5	5	5	5	5	5	5	4	4	5	5	5	1	3	2	2	1	2	1	2	1	1	4	3	1	2	1	3	2	6
3	5	6	5	7	9	6	9	9	9	5	5	5	4	5	8	5	7	3	5	4	5	5	2	2	4	1	3	3	1	1	1	1	2	1	1	2	3	3	2	4
3	8	3	4	3	8	5	8	9	5	5	5	5	8	3	8	3	3	3	3	5	5	5	3	4	4	2	3	4	3	1	2	3	4	3	1	1	4	3	2	6
3	2	2	6	2	6	8	2	2	2	2	9	7	5	7	7	2	5	7	3	7	2	8	2	4	3	1	1	2	1	1	1	1	3	4	1	1	3	3	1	6
3	5	5	5	5	7	7	7	5	4	4	8	8	7	7	3	1	1	5	1	7	5	7	3	1	2	1	3	1	3	1	1	1	2	3	4	3	3	3	1	1
3	7	5	5	5	7	5	7	3	7	5	5	5	5	7	1	7	9	9	5	7	3	5	2	2	4	2	2	4	3	2	1	2	1	1	3	3	3	3	2	1
3	3	3	5	6	7	6	5	7	3	5	7	5	5	6	2	2	1	5	6	6	5	6	2	1	3	1	2	2	2	1	1	1	2	2	1	2	1	3	1	5
3	8	7	1	9	8	4	7	5	7	5	1	5	5	5	7	6	5	5	5	5	5	5	2	1	4	2	3	4	4	2	2	2	1	1	1	3	1	3	3	1
3	3	6	5	5	7	5	3	5	6	5	5	5	4	5	4	2	2	5	5	5	4	5	2	1	2	2	2	2	2	2	2	1	1	1	2	2	3	2	2	3
3	4	3	7	5	5	6	4	3	2	3	7	5	5	7	5	5	2	5	3	6	5	7	3	2	1	2	2	1	2	2	2	1	1	1	3	2	3	2	2	1
3	4	5	5	5	3	5	5	4	3	6	5	5	5	5	2	3	3	5	4	5	5	5	3	1	2	3	2	1	3	2	3	1	1	1	2	3	2	2	2	1
3	2	1	5	1	2	5	6	5	3	5	5	7	5	5	1	1	5	5	3	5	2	5	1	1	1	1	1	2	1	1	1	1	2	1	1	1	1	1	1	1
3	5	5	6	5	4	7	5	5	5	4	6	6	5	6	4	3	3	7	1	6	6	6	3	3	2	1	3	2	3	2	1	2	3	3	3	2	3	3	2	3
3	9	7	5	3	9	9	6	9	1	5	5	5	9	5	5	5	5	5	5	8	5	8	2	2	4	2	4	4	2	4	3	4	2	1	3	2	4	3	1	3
3	1	3	5	5	5	5	4	3	1	5	6	6	1	5	5	5	5	5	3	5	4	5	2	2	1	1	2	1	1	1	1	1	2	2	1	2	1	2	1	3
3	4	4	4	4	4	6	5	5	6	4	5	5	5	5	7	7	5	5	5	5	5	6	3	2	2	2	2	2	3	2	2	1	3	1	2	3	1	2	2	2
3	5	5	5	5	5	5	5	5	5	5	5	5	5	5	5	5	5	5	5	5	5	5	2	1	1	1	1	1	1	1	1	1	1	1	1	2	1	1	1	1
3	4	4	6	4	4	5	4	5	4	4	6	5	5	5	5	4	3	4	4	5	4	5	2	1	2	2	2	2	2	2	2	1	1	1	1	2	1	2	2	2
3	8	8	5	5	9	5	9	5	9	3	5	5	5	5	4	4	4	3	3	5	5	5	4	1	4	3	3	4	4	1	1	2	1	3	1	2	3	3	3	5
3	5	5	5	5	7	5	7	5	5	5	5	5	5	5	7	5	5	5	5	5	5	6	2	1	3	1	2	2	2	1	1	1	1	1	1	2	1	3	1	1
3	2	5	5	5	9	5	7	5	6	5	6	5	5	5	9	5	3	6	2	4	6	5	2	3	4	2	2	1	2	1	1	1	3	2	1	2	3	3	3	4
3	9	7	3	6	9	5	7	6	8	9	5	5	6	5	8	8	7	5	9	3	9	5	2	3	3	3	2	3	3	2	2	4	4	4	2	3	4	4	3	4
3	8	6	5	6	9	5	8	5	8	5	4	5	6	5	9	5	1	2	5	5	5	5	3	3	4	2	2	4	3	1	1	2	2	2	1	2	2	3	3	3
3	8	6	5	2	9	5	8	3	1	5	5	5	7	5	4	2	2	7	1	5	3	5	2	2	4	3	3	4	3	2	2	3	2	1	2	2	1	2	2	3
3	4	5	5	5	9	9	1	1	9	1	5	8	9	9	7	9	9	5	9	5	9	9	4	2	4	3	3	4	3	4	3	2	2	1	1	1	3	3	3	3
3	6	2	5	5	1	6	6	2	3	5	5	5	7	5	1	1	1	1	5	1	3	5	2	1	2	2	1	3	4	4	4	3	1	1	3	3	2	4	2	1
3	5	5	2	3	9	5	9	5	6	5	4	5	5	5	7	3	3	9	9	1	5	6	3	2	3	1	2	3	1	1	2	2	3	1	2	1	2	3	3	4
3	6	5	5	6	7	5	8	6	8	5	5	5	7	5	5	5	2	5	2	6	5	6	2	2	3	1	2	3	2	4	2	3	2	2	1	1	2	2	1	3
3	5	5	6	5	2	6	5	4	4	1	5	6	3	6	1	1	1	1	1	6	1	6	3	1	2	2	3	2	3	3	2	1	2	1	1	2	2	2	2	3
3	7	8	5	6	9	5	5	7	5	5	5	5	6	5	4	7	6	5	5	5	5	7	2	3	4	4	3	4	3	2	2	3	3	3	3	2	3	4	4	5
3	7	5	5	5	9	5	5	5	1	5	5	5	5	5	5	1	1	5	1	5	5	5	1	3	4	1	2	2	1	1	1	1	4	1	1	2	2	1	1	5
3	2	2	5	5	6	5	3	3	1	5	6	5	5	5	4	2	1	5	3	5	5	5	2	2	2	1	2	2	2	3	1	2	2	1	2	3	3	2	1	4
3	6	7	7	8	7	5	7	8	5	6	3	5	7	5	9	7	4	2	2	2	8	8	3	2	4	3	2	3	2	2	2	3	2	2	2	2	3	2	3	4
3	9	9	5	9	9	9	9	9	1	5	5	5	9	5	9	9	9	1	9	5	9	5	3	2	4	4	3	4	4	4	4	4	2	1	4	4	2	2	3	1
3	5	5	5	5	7	5	5	4	4	5	6	7	6	5	4	3	3	5	5	7	5	6	2	2	3	3	3	2	3	2	2	2	2	1	3	3	2	1	2	3
3	3	3	9	5	9	6	5	2	1	1	9	5	4	4	9	5	1	1	1	5	5	9	3	3	3	2	4	1	4	4	4	1	3	2	4	4	3	4	3	5
3	7	7	5	7	7	5	6	3	2	5	5	5	5	5	3	3	1	5	1	5	3	6	3	1	3	1	1	4	3	1	1	1	3	1	1	3	4	1	2	3
3	7	4	6	4	9	8	2	9	8	8	3	2	8	3	7	9	5	5	9	9	6	5	3	2	3	3	4	3	3	2	1	3	4	4	4	3	4	4	3	6
3	6	6	4	6	8	8	7	5	6	3	6	6	8	7	3	5	3	7	7	3	6	7	3	2	4	3	3	3	4	2	2	3	2	1	2	2	3	3	4	2
3	7	5	5	5	8	5	8	6	5	5	5	5	3	5	6	5	5	5	5	4	7	5	3	2	4	2	3	4	2	3	3	1	2	2	2	2	4	3	3	3
3	5	6	5	5	7	5	5	5	5	5	5	5	5	5	7	6	3	5	3	5	5	6	2	2	3	1	2	2	2	1	2	1	3	2	2	2	3	3	1	2
3	2	5	6	3	8	6	5	8	2	2	7	7	5	5	8	8	2	7	2	5	8	5	3	3	4	4	2	2	2	1	3	2	1	1	1	3	2	2	4	3
3	3	5	5	5	8	5	5	5	6	5	5	5	5	5	6	5	2	5	2	5	5	5	3	1	4	3	2	2	2	3	2	1	3	1	1	2	3	2	4	4
3	3	4	5	4	6	5	4	6	3	5	5	5	5	5	4	3	2	5	2	5	4	5	3	1	3	3	3	3	3	3	3	2	3	3	2	2	3	3	2	5
3	4	4	5	4	7	7	3	5	3	3	7	7	5	6	3	3	5	5	5	7	5	5	3	1	3	2	3	2	3	2	1	2	1	1	1	2	1	1	2	1
3	4	7	5	6	9	5	7	6	6	6	5	5	6	5	9	6	4	4	4	4	7	5	3	2	4	3	4	4	3	4	3	2	3	2	3	3	4	2	3	3
3	3	4	6	2	3	7	4	5	4	3	8	6	6	7	2	2	3	6	4	7	5	6	1	3	1	1	2	1	2	1	2	1	3	4	1	1	4	4	2	7
3	9	9	5	5	9	5	6	7	5	5	5	5	8	5	9	5	5	5	5	8	5	5	3	2	4	3	2	3	3	3	4	3	2	2	4	4	1	3	3	3
3	7	7	2	5	7	5	7	7	7	5	5	3	3	3	6	6	5	5	5	3	6	3	3	2	4	2	3	1	2	1	2	3	3	2	2	1	4	3	1	3
3	7	7	5	8	7	6	6	6	7	3	6	6	7	7	4	3	1	3	2	3	6	6	2	3	3	2	4	3	2	2	1	3	4	3	2	3	2	3	2	4
3	5	6	6	5	8	8	5	5	5	5	5	5	5	6	6	5	5	5	5	5	5	5	4	1	3	4	2	2	3	3	3	2	2	2	2	1	2	2	3	5
3	5	7	3	5	7	5	7	5	7	5	5	5	5	5	5	7	7	4	7	3	7	7	3	2	3	3	3	2	2	2	2	2	2	3	2	2	3	2	3	3
3	3	3	5	5	2	5	3	7	2	1	5	6	6	6	2	2	1	6	2	6	3	5	1	1	2	1	1	1	1	2	1	1	1	1	2	3	2	1	2	1
3	2	1	5	6	8	5	3	8	5	2	2	8	5	6	3	2	1	1	1	1	3	3	1	1	2	1	1	2	2	2	1	1	1	1	2	4	1	3	1	1
3	7	9	4	5	8	7	9	5	5	3	6	6	5	7	4	4	6	5	5	7	7	7	2	3	3	4	4	3	3	1	1	3	3	3	2	1	4	2	3	5
3	8	9	5	6	9	5	9	7	2	4	7	7	8	5	7	6	1	5	2	6	5	8	4	2	4	4	4	4	4	3	4	4	4	3	3	3	4	3	3	5
3	3	7	5	7	9	4	7	7	8	5	4	3	6	5	5	4	3	3	4	4	7	5	2	3	3	2	2	3	3	3	2	2	3	3	2	1	1	2	2	6
3	9	2	5	1	8	5	5	8	8	5	5	5	8	8	1	1	1	1	1	9	9	5	4	1	4	3	4	4	4	4	4	4	1	1	4	3	1	1	4	1
3	7	7	4	6	9	5	4	8	9	6	3	5	8	2	3	1	1	5	1	7	4	5	2	1	1	1	3	1	3	2	1	1	1	1	1	1	1	2	2	1
3	1	7	5	7	1	8	6	4	1	3	7	8	5	7	7	4	2	9	1	5	7	5	3	3	3	2	3	3	3	2	1	2	4	2	1	2	4	3	3	4
3	6	5	4	6	7	5	6	3	6	5	6	5	3	5	3	5	3	6	5	7	3	7	2	2	3	2	2	3	3	3	2	3	2	1	2	2	3	2	3	3
3	6	5	6	5	7	6	6	5	5	5	6	5	5	5	5	5	4	5	4	5	5	5	3	1	2	1	2	2	2	1	1	1	1	1	2	1	2	1	1	1
3	4	4	6	5	6	6	5	6	4	2	5	5	5	6	4	3	2	6	3	6	4	7	2	2	2	2	3	2	2	2	2	2	3	1	2	1	3	2	3	3
3	7	6	5	7	7	4	6	6	6	5	5	5	5	5	7	5	5	4	6	4	6	5	2	3	3	2	3	3	3	2	3	1	3	2	3	2	4	4	2	3
3	7	6	5	5	9	7	5	5	5	5	7	5	7	7	7	6	5	5	5	5	6	5	3	1	4	3	4	3	3	2	2	2	1	4	2	2	3	3	3	1
3	3	3	5	3	3	5	3	4	3	2	5	5	5	5	5	2	5	5	3	5	5	5	3	1	1	1	1	1	1	2	1	1	1	1	1	2	1	1	1	1
3	7	7	5	5	8	5	6	5	7	5	5	5	7	5	5	3	4	5	6	5	4	5	3	3	3	2	3	3	3	1	1	3	4	3	1	1	1	4	2	4
3	4	4	5	4	3	5	4	4	6	4	5	5	5	5	5	4	3	5	4	5	4	6	1	2	2	1	1	1	1	1	1	1	2	1	1	1	1	2	1	1
3	5	5	5	5	5	5	5	6	5	5	5	5	5	5	5	3	4	5	5	4	5	5	2	1	1	1	1	1	1	1	1	1	1	1	1	1	3	1	1	3
3	1	7	5	7	1	8	6	4	1	3	7	8	5	7	7	4	2	9	1	5	7	5	3	3	3	2	3	3	3	2	1	2	4	2	1	2	4	3	3	4
3	4	7	5	5	9	5	6	9	5	9	3	5	7	5	3	5	5	5	5	6	5	5	4	1	2	3	2	2	3	1	3	2	2	2	3	3	2	1	4	4
3	9	9	5	1	1	5	9	6	9	1	6	5	9	5	1	1	1	5	1	4	5	5	2	2	3	3	3	3	3	2	1	3	2	2	1	3	2	2	3	2
3	4	5	7	5	9	7	4	2	3	5	6	6	5	7	6	2	1	5	3	5	7	5	2	1	3	2	2	2	3	3	1	1	2	1	1	2	1	3	1	1
3	1	1	5	2	2	5	2	1	1	1	5	5	5	5	5	1	1	1	1	5	5	5	2	1	2	1	1	1	1	1	1	1	2	2	1	2	1	1	1	2
3	3	5	5	5	7	5	6	3	2	3	6	5	1	5	3	1	3	5	3	6	5	5	2	1	3	2	2	3	4	2	1	2	1	1	1	2	2	3	2	3
3	5	5	5	5	5	6	6	5	5	5	9	5	5	5	1	1	1	5	4	7	1	6	2	1	2	2	2	1	1	2	3	1	1	1	1	2	3	1	2	2
3	7	7	6	4	8	5	5	7	6	4	5	5	7	5	6	5	6	5	4	5	7	5	3	2	4	3	3	3	3	2	2	4	2	2	2	2	1	3	2	3
3	1	1	6	6	2	7	5	6	3	2	7	6	7	5	3	3	1	5	5	6	3	7	2	2	2	2	2	1	3	2	3	3	3	3	2	2	3	2	2	3
3	1	5	5	5	7	5	5	5	3	5	5	5	4	5	5	5	2	5	5	6	2	6	3	3	2	2	3	1	3	3	3	2	4	3	3	2	4	2	3	5
3	3	8	6	3	9	7	9	6	1	3	7	6	7	5	7	3	3	3	2	7	2	7	1	2	4	4	4	4	4	3	2	3	2	3	2	2	4	2	3	3
3	7	5	5	8	9	5	8	5	3	5	5	5	7	5	9	1	1	5	1	5	8	7	2	1	4	1	1	3	2	2	1	3	1	1	3	2	2	4	2	3
3	3	6	5	6	7	5	4	5	2	2	5	5	3	5	6	6	2	3	7	5	5	5	3	2	3	3	3	3	3	3	2	2	3	3	2	1	3	3	3	3
3	5	5	5	5	9	8	7	5	8	8	9	5	5	5	3	3	3	5	5	5	3	8	4	1	2	3	4	2	4	3	2	2	2	2	2	2	2	1	2	1
3	9	6	1	6	9	2	8	3	3	3	1	1	7	2	9	2	5	5	2	1	5	5	2	1	4	1	3	3	2	1	3	3	4	4	1	2	4	3	1	6
3	6	6	5	5	6	5	6	4	4	4	6	5	5	5	2	4	2	5	4	5	3	6	3	2	2	1	3	2	3	3	3	2	3	3	3	3	3	4	1	4
3	3	3	5	3	3	5	3	2	3	2	6	6	5	7	3	3	1	5	5	5	4	5	2	1	2	2	3	2	2	2	1	2	2	2	2	1	3	2	2	2
3	4	5	6	5	7	5	6	5	5	5	5	6	5	5	6	4	1	5	5	6	3	6	3	3	3	2	2	2	3	1	2	1	4	3	1	1	3	4	3	6
3	5	6	4	8	9	5	3	6	6	4	1	3	6	3	6	7	6	4	7	3	9	3	1	1	4	1	2	4	3	4	4	1	2	1	1	1	2	1	2	1
3	4	2	5	2	6	5	3	7	4	2	2	2	7	2	2	2	2	2	2	4	2	6	2	3	3	2	2	3	2	2	1	1	3	1	2	2	4	3	3	6
3	9	9	5	9	9	6	9	9	9	9	6	5	9	5	9	9	9	6	9	5	9	5	3	1	4	4	4	4	3	2	4	4	2	2	3	3	3	3	4	3
3	6	6	5	5	6	6	6	3	5	5	6	6	5	5	3	3	3	7	3	3	3	7	3	1	3	2	1	2	2	2	1	2	1	2	3	2	3	3	2	3
3	8	7	5	5	9	6	6	4	7	5	6	5	6	6	7	5	5	5	5	5	5	6	3	3	4	3	2	3	2	1	1	1	3	1	2	3	2	3	2	3
3	4	5	5	5	7	5	6	3	3	3	5	6	6	6	4	4	3	6	6	4	3	5	3	1	3	2	3	1	2	1	1	2	2	2	1	2	1	3	2	3
3	1	5	5	6	7	5	6	5	1	5	5	5	6	7	6	4	3	1	1	6	4	5	3	2	2	1	3	1	2	1	3	2	3	3	2	1	3	3	2	2
3	3	3	5	5	1	5	6	5	6	3	6	5	2	5	1	2	2	5	3	5	5	5	1	2	1	1	2	3	1	1	1	3	2	1	2	2	4	3	2	4
3	5	5	7	3	8	5	4	7	4	3	3	7	2	8	8	8	9	7	1	8	8	8	4	4	4	4	4	4	4	4	3	4	2	1	3	2	3	3	3	4
3	2	2	5	5	5	5	5	5	5	7	7	6	4	7	4	6	9	7	7	8	8	9	2	3	3	2	1	1	2	2	1	2	2	1	2	3	1	2	3	6
3	9	9	6	1	9	7	8	7	6	1	9	6	8	6	5	5	1	5	9	3	9	9	3	3	4	4	4	4	4	4	4	3	3	1	4	2	3	1	1	4
3	5	5	6	5	7	7	4	6	6	5	5	5	4	6	5	5	5	6	7	7	5	5	4	3	2	2	4	2	3	2	1	2	3	1	2	2	3	3	2	5
3	3	3	5	1	7	5	9	4	3	1	7	5	4	5	3	3	3	5	8	5	5	5	4	2	3	3	2	2	3	1	3	1	2	2	2	1	4	1	4	2
3	7	5	3	6	8	6	5	4	8	3	5	6	5	5	7	2	2	6	8	6	2	6	3	2	3	3	2	2	3	2	2	2	2	2	2	2	3	2	2	3
3	5	5	5	4	6	5	5	4	4	5	5	4	3	6	4	4	3	4	5	5	4	6	1	1	1	1	2	1	1	1	1	1	2	1	1	2	2	2	2	3
3	1	1	5	5	5	1	5	5	3	5	3	5	5	5	1	1	1	1	9	9	5	9	3	3	3	2	3	3	3	2	2	3	1	1	3	3	3	2	1	1
3	7	7	5	7	8	5	7	7	7	3	5	5	8	5	7	2	2	4	1	5	2	5	2	1	4	3	2	4	2	4	3	4	2	3	1	2	2	2	3	5
3	4	5	6	5	7	8	5	5	4	5	6	8	6	5	3	4	4	6	5	8	5	7	1	1	2	2	1	1	1	2	1	1	1	1	2	2	1	2	1	4
3	4	5	5	5	7	6	4	4	3	5	5	5	3	5	3	2	1	5	1	6	3	5	2	1	3	1	1	2	2	2	2	2	3	4	1	2	2	3	1	7
3	8	8	5	5	8	6	8	8	8	5	5	5	4	5	6	4	4	4	4	4	4	5	2	3	2	1	3	3	2	2	1	2	3	3	2	2	4	4	2	3
3	2	2	5	7	8	5	8	8	3	8	5	7	5	7	8	8	3	3	2	6	8	8	2	3	3	2	3	1	2	2	2	2	3	1	2	1	3	3	2	5
3	3	4	7	1	8	8	3	7	1	1	2	7	3	7	1	1	1	1	9	5	5	5	2	2	3	2	2	3	2	2	2	3	2	2	2	2	4	2	3	3
3	5	5	5	1	5	4	1	1	1	5	5	9	9	5	1	1	1	5	1	9	5	6	2	1	1	1	3	1	2	1	2	2	1	1	3	2	3	3	1	1
3	1	1	6	1	1	6	1	1	1	1	6	5	1	5	9	1	1	5	1	5	1	5	4	2	2	3	3	3	3	3	3	3	3	3	3	2	2	2	2	5
3	5	5	5	5	5	5	5	5	5	5	5	5	5	5	4	5	5	5	5	5	5	5	1	1	1	1	1	1	2	1	1	1	1	1	1	2	2	2	1	6
3	7	7	5	7	7	5	5	5	4	4	5	5	5	5	5	6	5	5	7	5	7	5	3	3	3	3	3	3	3	3	3	2	3	2	3	2	3	3	2	2
3	7	7	5	5	9	5	8	8	7	3	5	5	6	5	8	5	5	2	7	3	7	5	2	3	4	3	3	4	2	2	1	2	3	2	1	2	3	3	3	3
3	9	9	5	9	9	5	9	7	9	5	7	5	5	5	5	5	9	5	9	5	5	5	4	1	4	4	3	4	3	4	4	1	1	1	4	4	2	1	3	1
3	5	5	9	5	7	7	5	5	6	5	6	6	5	6	5	5	5	6	5	5	5	5	2	4	3	2	4	1	4	2	2	1	4	3	4	4	4	4	2	5
3	5	5	5	4	6	5	6	5	6	5	5	5	4	5	6	5	5	5	6	4	5	5	2	2	2	2	2	3	3	1	1	1	1	3	1	2	3	2	2	4
3	7	6	4	4	8	5	6	5	4	3	7	4	6	5	4	2	1	6	7	6	7	5	3	2	3	3	3	3	4	4	3	2	3	2	3	2	3	2	4	3
3	3	7	5	4	6	5	7	7	3	3	5	5	5	5	7	3	3	4	4	5	5	5	2	1	3	1	2	2	1	1	2	2	1	1	1	2	2	2	2	3
3	7	3	5	3	7	5	6	8	7	3	5	5	5	5	3	3	3	7	7	2	5	5	3	2	3	2	3	3	4	2	2	2	2	2	2	1	2	1	2	4
3	5	5	5	5	5	5	5	5	4	3	5	5	4	5	5	5	4	5	5	5	5	5	3	1	2	2	2	1	1	1	1	1	1	1	1	3	3	2	2	2
3	3	3	5	5	1	5	5	1	1	5	6	5	5	5	5	1	1	5	1	7	1	5	2	2	1	1	2	1	2	1	2	1	3	4	2	2	2	2	2	3
3	5	8	3	5	9	4	8	5	7	1	5	5	5	5	8	5	8	3	8	3	7	4	4	4	4	1	4	4	3	1	1	2	4	4	1	2	4	4	2	6
3	7	5	4	6	7	5	7	5	7	5	5	5	5	5	6	5	5	5	6	4	5	5	2	2	4	2	3	3	2	2	2	2	2	2	2	2	4	2	3	6
3	9	7	6	5	7	9	9	6	7	3	5	3	7	6	7	4	1	6	5	6	5	9	2	1	3	2	2	4	2	3	2	3	3	3	2	2	3	3	3	6
3	2	2	5	2	2	5	5	2	2	2	2	4	2	4	2	2	2	4	2	2	6	5	1	2	2	2	2	2	2	2	2	2	3	3	2	2	3	2	1	1
3	1	1	6	5	3	5	1	5	1	3	7	5	1	5	2	3	1	6	2	6	1	5	2	4	1	2	2	1	3	2	1	1	2	1	1	2	2	3	2	4
3	2	3	9	5	4	7	4	5	4	5	5	5	5	5	5	4	1	5	2	5	3	5	3	1	1	1	3	1	3	1	1	1	1	1	2	3	3	1	1	7
3	6	6	3	5	9	2	7	7	9	4	5	4	7	5	5	4	4	6	7	4	7	4	3	1	4	3	3	4	3	4	3	3	2	2	3	4	2	2	3	1
3	5	5	5	5	5	5	5	5	5	5	5	5	5	5	4	5	5	5	5	5	5	5	1	1	1	1	2	1	2	1	2	1	2	2	1	1	3	3	2	3
3	1	2	6	5	3	8	2	5	1	5	5	7	3	7	6	5	4	6	2	7	1	5	2	1	2	1	1	1	2	2	1	2	2	3	2	2	4	3	1	4
3	3	3	5	3	8	7	5	2	1	1	5	5	5	5	2	2	2	5	3	4	2	5	3	1	3	1	2	1	2	2	1	2	1	1	1	2	1	1	2	2
3	6	6	5	6	6	5	6	5	6	6	5	5	6	5	6	6	5	5	5	5	5	5	3	3	2	2	1	2	3	3	2	2	3	3	2	3	3	2	2	4
3	7	6	5	5	6	5	6	5	4	5	3	5	5	4	2	2	1	5	8	4	6	5	2	1	3	1	2	2	1	1	1	1	2	2	1	2	2	4	2	3
3	7	7	5	7	7	5	7	4	7	3	5	5	5	5	7	3	5	5	5	5	7	5	3	2	3	2	2	3	2	2	2	2	2	2	2	2	3	2	2	1
3	1	1	5	1	1	5	1	5	1	1	5	5	1	5	1	1	1	5	1	5	1	5	2	4	1	1	1	1	1	1	1	1	1	1	1	1	1	2	1	1
3	6	6	5	6	8	6	6	5	8	5	6	5	7	6	7	5	5	2	5	7	5	5	3	2	4	3	3	3	3	2	4	2	2	2	4	2	1	2	3	3
3	4	5	5	5	3	5	5	5	4	5	5	5	5	6	5	5	4	5	5	6	5	5	2	1	2	2	2	2	2	2	2	2	2	2	2	2	3	3	2	3
3	4	7	1	6	9	7	5	7	2	5	5	5	8	5	9	9	9	5	9	5	5	5	4	2	4	4	4	2	4	2	3	3	2	3	2	2	3	3	3	6
3	9	9	1	9	9	1	9	9	9	9	1	1	9	1	9	9	9	5	5	1	9	1	4	2	4	4	4	4	4	4	4	4	1	2	4	3	1	2	3	3
3	9	7	5	5	9	5	7	3	4	1	7	5	5	5	8	3	3	4	7	5	5	5	1	1	3	3	2	3	2	1	2	2	3	2	1	1	4	3	3	5
3	1	1	5	1	1	5	1	1	1	1	5	5	5	5	1	1	1	5	1	5	1	5	1	2	1	1	1	1	3	1	1	1	1	2	1	3	4	2	1	1
3	5	5	6	5	2	7	5	4	4	4	6	7	4	7	4	2	1	5	1	6	5	6	3	1	1	1	2	1	3	2	1	1	1	1	1	2	3	3	1	1
3	5	5	5	5	8	5	4	3	3	5	5	5	5	5	4	6	3	5	5	5	5	5	2	1	3	2	1	2	2	2	2	2	3	1	2	2	3	3	2	3
3	1	1	5	1	1	7	1	1	1	1	1	5	5	9	1	1	1	1	1	5	1	1	2	1	1	1	1	1	1	1	1	1	2	1	1	1	3	2	1	1
3	1	1	7	2	3	7	2	6	3	1	5	6	1	6	1	1	1	6	5	8	1	7	2	1	2	1	1	2	2	1	1	2	1	1	1	2	2	2	1	2
3	1	3	9	1	1	9	1	1	1	5	5	5	5	5	1	1	1	5	5	1	1	8	1	1	1	1	3	1	3	1	1	1	2	2	1	1	4	4	1	4
3	5	7	7	5	8	8	8	5	2	8	3	9	5	8	8	7	1	5	5	7	5	8	1	3	4	1	2	3	1	1	1	4	4	3	1	1	1	2	1	4
3	1	7	5	9	9	7	7	5	3	5	7	6	8	5	5	7	1	9	1	5	9	9	3	2	4	2	3	1	4	4	1	3	2	2	1	2	3	1	2	2
3	3	7	5	7	9	5	7	6	1	1	5	5	7	5	7	2	1	4	1	5	1	5	2	1	3	2	2	2	4	1	1	2	1	1	1	2	3	1	3	2
3	1	1	5	1	1	7	2	1	1	1	5	7	1	7	7	1	1	1	1	7	1	7	1	1	2	1	3	1	1	1	1	1	1	1	1	1	4	2	2	2
3	3	3	5	4	6	5	5	5	5	5	6	6	5	5	2	2	2	5	2	5	5	5	2	1	3	2	1	2	2	3	1	1	1	1	2	1	3	2	2	1
3	6	4	4	5	9	3	4	9	4	5	1	3	9	2	7	8	6	5	4	9	9	9	3	3	3	1	3	1	2	1	1	1	3	2	1	1	2	2	1	1
3	8	1	3	1	8	5	8	6	1	5	5	5	5	5	8	1	2	5	1	5	1	5	2	3	4	1	1	3	2	1	1	2	3	3	1	2	4	4	3	5
3	2	5	5	5	7	5	1	3	1	1	7	5	5	6	2	1	1	5	1	6	3	7	2	2	3	2	2	1	3	2	2	2	2	4	2	1	4	2	2	4
3	4	5	5	5	3	5	3	5	3	5	5	5	5	5	3	3	5	5	1	5	3	5	2	4	2	1	1	1	2	1	1	2	4	3	1	1	3	3	2	3
3	8	5	2	5	8	2	5	1	8	5	5	2	3	5	5	5	5	2	8	2	5	5	2	1	4	1	2	3	3	1	1	1	1	1	1	1	3	3	2	1
3	2	3	5	4	5	5	3	2	1	3	5	5	4	5	2	1	2	5	1	5	4	5	1	2	1	1	2	1	2	2	1	1	3	2	1	2	4	4	1	4
3	4	6	4	4	6	4	6	5	4	4	5	6	5	6	6	4	4	4	6	6	4	6	2	1	3	1	3	1	2	1	1	2	3	3	2	1	4	3	2	6
3	5	2	5	1	1	5	1	6	5	2	6	5	5	4	1	1	1	1	1	5	5	5	3	2	1	2	3	1	4	1	2	2	3	2	1	3	4	3	1	2
3	6	6	6	4	9	5	8	4	4	2	5	4	8	7	6	4	1	4	4	1	1	4	4	2	4	3	4	2	4	4	4	1	1	1	4	4	3	1	2	1
3	5	5	5	5	7	5	6	5	5	5	5	5	5	5	3	5	5	5	5	5	5	5	2	2	3	1	1	1	1	2	2	1	4	2	1	1	4	2	2	4
3	2	3	5	5	7	5	5	4	1	4	5	5	5	5	3	3	1	6	1	5	4	5	3	2	3	2	2	1	2	3	1	1	3	3	1	2	1	4	2	4
3	9	9	5	5	9	5	1	1	1	5	5	5	1	5	1	1	1	5	1	5	5	5	2	2	4	2	2	1	3	3	1	1	1	3	2	2	3	4	2	1
3	7	6	5	6	6	7	6	3	5	5	5	3	5	5	7	5	3	5	4	3	4	5	4	1	3	3	3	2	4	2	2	1	1	1	3	3	3	1	2	2
3	3	3	5	5	5	6	5	5	3	4	5	6	3	5	4	1	1	5	1	5	1	5	2	3	3	2	2	2	3	3	2	2	3	3	2	2	2	3	3	4
3	8	7	4	7	9	5	7	5	5	3	5	5	5	5	5	5	5	4	5	5	4	6	1	3	4	3	3	3	3	3	3	2	2	3	2	2	3	3	3	4
3	3	5	5	5	7	5	3	3	1	5	5	5	3	5	7	2	2	5	7	5	5	6	3	2	3	1	2	1	3	1	1	2	1	1	1	1	2	3	2	2
3	2	2	8	3	1	9	2	3	2	2	2	5	7	7	4	4	4	9	1	6	3	8	1	1	1	2	2	1	1	4	3	1	1	1	4	3	1	3	3	4
3	9	9	5	8	9	5	8	7	9	7	5	5	8	5	9	6	7	6	3	5	5	5	4	2	4	4	4	4	4	1	2	4	1	1	2	2	2	2	4	2
3	9	5	5	5	9	5	5	5	9	1	5	5	7	5	1	1	1	5	1	5	5	5	1	1	4	3	1	4	1	3	3	4	1	2	2	2	2	2	4	2
3	6	6	6	6	7	5	7	4	1	5	5	6	4	6	6	5	4	6	6	4	6	8	2	1	2	2	3	3	2	2	2	2	1	2	2	3	1	1	2	3
3	5	5	5	5	6	6	5	4	5	5	5	5	4	6	4	2	2	7	3	6	5	7	2	3	2	1	2	2	3	2	1	1	3	4	2	1	3	2	1	5
3	5	5	5	5	7	5	5	5	5	5	5	5	5	5	6	4	4	7	5	5	5	5	2	1	3	3	1	2	3	3	1	1	1	1	1	2	1	3	2	1
3	3	6	5	4	7	6	3	7	3	3	6	5	5	5	6	1	1	4	4	3	6	5	2	1	3	2	3	1	2	1	1	1	3	3	1	2	3	4	2	5
3	3	6	5	4	7	6	3	7	3	3	6	5	5	5	6	1	1	4	4	3	6	5	2	1	3	2	3	1	2	1	1	1	3	3	1	2	3	4	2	5
3	6	5	5	4	1	5	6	2	2	1	5	5	4	6	1	1	3	5	3	5	4	7	2	3	1	2	3	1	3	2	2	1	2	1	2	2	2	3	2	4
3	6	7	4	7	7	5	3	7	4	5	3	5	3	7	5	5	5	5	3	5	4	5	1	1	1	1	3	1	1	1	1	1	4	4	1	1	2	1	1	5
3	6	5	5	5	7	5	6	5	5	5	5	5	5	5	6	6	5	5	5	5	6	6	2	1	3	3	2	2	2	2	1	3	4	4	1	1	4	4	2	6
3	2	3	5	3	4	7	5	1	1	3	7	6	6	5	6	1	1	7	1	5	3	6	1	2	1	1	2	1	1	2	1	2	2	1	3	2	3	1	1	1
3	8	8	3	5	9	5	8	6	8	4	5	5	8	5	8	8	8	5	7	5	5	5	3	2	4	3	3	3	3	2	2	3	3	2	2	3	3	4	4	3
3	6	7	5	5	6	5	6	6	5	5	5	5	6	5	4	4	5	5	6	5	5	5	3	4	4	2	4	2	3	3	4	4	4	3	2	4	3	2	2	6
3	7	8	5	7	7	7	4	3	3	5	5	5	3	6	4	2	1	6	1	5	3	8	2	3	3	2	2	2	3	1	1	2	3	2	2	2	3	3	2	4
3	3	3	3	2	6	6	5	6	5	1	6	6	7	6	2	1	1	1	1	2	6	5	3	2	4	3	3	2	3	2	2	2	3	3	1	1	4	4	2	3
3	3	3	3	2	6	6	5	6	5	1	6	6	7	6	2	1	1	1	1	2	6	5	3	2	4	3	3	2	3	2	2	2	3	3	1	1	4	4	2	3
3	6	7	6	4	8	5	5	8	8	4	3	5	6	4	3	3	3	7	3	7	3	7	2	3	3	3	3	2	2	2	3	2	3	3	2	2	3	3	2	5
3	4	4	5	4	6	5	4	5	4	4	6	5	5	6	4	4	4	5	4	5	4	5	2	1	1	1	2	2	2	2	2	1	1	1	1	2	2	2	1	1
3	5	5	5	5	7	5	5	5	5	5	5	5	1	5	5	5	5	5	5	5	5	5	1	1	2	1	2	1	1	1	1	1	4	4	1	1	1	4	1	6
3	5	5	5	4	6	5	4	5	3	5	6	5	5	5	4	5	4	4	2	4	4	5	2	2	2	1	2	2	2	2	2	2	2	1	2	2	3	3	2	4
3	6	5	6	5	7	6	5	4	4	4	6	5	6	5	5	4	4	4	4	5	6	6	2	3	3	1	1	2	2	3	3	3	3	3	3	2	4	4	1	2
3	9	9	5	9	9	5	9	5	9	5	5	5	9	5	9	9	9	1	1	1	9	5	3	1	4	4	4	4	4	4	2	4	2	2	3	4	1	2	4	2
3	7	7	5	7	9	5	9	7	8	5	5	5	9	5	9	9	9	5	9	5	9	7	3	2	4	4	3	4	4	3	4	3	2	1	3	3	1	2	4	1
3	7	7	5	7	9	5	9	7	8	5	5	5	9	5	9	9	9	5	9	5	9	7	3	2	4	4	3	4	4	3	4	3	2	1	3	3	1	2	4	1
3	3	7	9	4	3	8	3	5	3	4	8	8	8	8	5	4	3	8	2	8	3	8	2	1	1	3	3	1	2	3	2	2	2	1	3	2	2	2	1	6
3	5	5	5	5	6	5	5	5	4	5	5	5	5	5	4	5	4	5	5	5	5	5	3	1	3	2	3	1	2	3	3	1	1	2	3	3	2	2	1	2
3	1	1	5	1	1	7	3	7	1	5	8	5	7	5	3	1	4	6	1	7	8	7	2	1	1	1	2	1	2	2	3	3	2	3	1	3	4	3	1	6
3	5	5	6	6	5	5	5	5	5	3	6	7	5	5	5	5	4	5	5	7	6	5	2	3	1	1	1	1	1	3	1	1	1	2	1	3	4	2	1	3
3	7	8	3	5	7	5	9	6	5	1	5	5	7	3	4	6	7	6	8	4	7	4	2	1	4	1	2	3	4	1	3	3	2	1	1	2	4	3	1	4
3	7	7	5	6	7	5	6	5	6	5	5	5	5	5	7	5	4	5	5	5	5	5	2	1	3	2	2	1	3	3	1	1	1	1	3	2	3	2	2	3
3	7	3	6	3	4	7	5	5	5	5	5	6	4	6	5	5	4	5	4	6	4	7	4	2	4	2	3	2	3	2	3	2	1	1	3	2	3	1	3	3
3	2	1	7	1	9	8	4	4	1	1	8	8	1	7	6	8	9	7	9	9	7	9	3	1	1	2	2	1	2	4	2	1	3	3	1	1	2	3	2	4
3	5	5	5	5	3	5	5	5	5	5	5	5	5	5	3	5	3	5	5	6	5	5	2	1	1	1	2	1	2	1	1	2	1	1	1	1	1	2	1	2
3	3	6	5	6	6	5	6	4	4	4	6	6	6	6	4	6	3	3	3	4	3	5	1	3	3	3	1	1	1	1	1	1	3	1	1	2	4	2	1	3
3	2	1	7	1	9	8	4	4	1	1	8	8	1	7	6	8	9	7	9	9	7	9	3	1	1	2	2	1	2	4	2	1	3	3	1	1	2	3	2	4
3	1	9	5	9	1	5	7	5	1	1	5	5	6	5	1	1	1	1	1	6	2	6	3	3	2	2	2	1	2	2	2	2	2	2	2	2	2	3	3	4
3	5	5	5	5	9	6	7	9	6	1	1	1	2	5	9	9	5	1	1	1	5	5	2	2	4	4	3	3	2	2	1	1	4	3	1	1	3	4	4	6
3	3	3	7	2	8	7	4	4	4	4	2	4	2	6	7	3	2	6	7	6	9	4	3	3	4	4	4	3	2	2	1	3	2	2	2	2	1	3	1	4
3	8	5	4	5	1	6	8	3	3	1	5	5	6	5	2	1	1	2	2	5	3	5	2	1	2	3	3	4	2	2	3	3	1	2	3	3	4	3	3	4
3	8	6	3	5	8	5	7	5	8	5	5	5	7	5	5	3	5	4	8	4	5	5	3	2	4	2	3	3	3	2	2	3	3	2	3	3	1	3	3	3
3	5	6	5	7	9	6	3	4	7	3	5	6	5	5	2	1	1	3	6	5	1	5	3	1	3	2	3	2	3	2	2	2	3	2	3	3	3	3	2	4
3	6	5	5	4	5	6	5	4	5	4	7	6	5	5	5	6	6	6	6	7	3	6	2	3	2	2	2	2	3	2	2	2	3	3	2	2	4	3	3	6
3	1	5	5	5	1	5	5	1	1	5	7	7	1	7	5	5	1	5	5	8	1	7	4	1	2	1	1	1	1	1	1	1	1	1	1	2	1	1	1	1
3	1	7	6	2	7	6	7	5	1	2	5	7	7	6	5	1	1	6	1	6	3	6	3	1	4	4	4	2	3	3	2	3	2	1	2	2	1	2	3	2
3	7	4	4	3	8	7	8	7	8	3	5	5	6	4	3	1	1	6	8	5	7	5	3	3	4	2	2	3	3	3	3	4	3	2	3	2	2	3	2	5
3	9	9	1	5	9	2	9	9	9	9	5	3	9	1	9	9	1	5	5	1	9	5	4	4	4	1	2	4	2	4	1	4	4	2	1	2	1	3	1	6
3	5	7	5	7	8	6	4	5	3	5	5	6	4	5	7	3	1	5	5	4	4	5	3	3	3	4	4	2	4	2	3	2	3	2	2	2	4	3	2	6
3	8	2	2	6	9	3	8	7	8	2	5	3	3	3	7	7	7	5	5	3	7	3	4	2	4	4	3	4	3	1	1	1	3	3	1	2	4	2	3	4
3	4	6	5	3	3	6	7	7	7	3	5	5	6	4	4	3	2	3	7	5	6	5	2	1	3	1	2	3	3	2	2	3	2	3	3	2	2	3	2	1
3	5	4	5	5	2	6	3	2	4	4	6	5	5	6	2	1	3	5	5	5	3	6	3	1	1	1	2	1	1	1	1	1	1	1	1	1	2	2	2	2
3	1	1	5	5	1	5	5	5	1	5	5	5	5	5	5	1	5	5	1	5	1	5	2	3	1	1	3	1	3	2	3	1	4	3	1	1	4	4	1	5
3	3	3	6	4	8	9	3	8	2	3	6	5	5	8	7	3	1	7	4	5	4	8	3	2	3	2	2	1	2	2	2	2	2	1	2	2	3	2	2	2
3	3	3	6	3	2	6	3	5	3	3	6	5	5	4	3	2	3	4	3	5	5	5	2	1	1	1	2	1	1	1	1	1	1	1	1	2	1	2	2	2
3	6	4	5	4	7	5	6	5	6	5	5	5	5	6	4	3	3	5	4	5	5	5	2	2	3	2	2	2	2	1	2	1	2	1	3	4	3	4	2	3
3	7	7	5	5	9	5	6	5	9	5	7	5	7	5	5	5	5	5	5	5	5	7	4	4	4	2	4	3	4	4	4	2	3	3	4	2	4	2	3	4
3	8	8	4	2	1	5	8	3	2	1	5	5	5	4	6	2	1	5	5	3	5	5	2	1	1	2	2	3	2	2	3	3	1	1	2	1	4	3	2	2
3	3	2	5	1	4	7	1	1	2	1	5	5	1	6	3	1	1	5	5	5	1	7	3	2	3	1	3	1	2	1	2	1	3	3	1	2	3	2	2	4
3	4	5	6	5	9	5	5	7	8	5	6	6	8	5	5	4	3	3	5	5	5	5	4	1	3	3	3	2	2	2	2	2	1	1	2	2	1	1	3	1
3	7	8	5	6	9	5	7	6	4	3	6	5	7	5	2	3	3	5	7	7	5	5	4	1	4	4	3	3	4	3	3	4	3	3	3	1	3	2	3	2
3	9	9	5	9	9	5	5	5	9	5	5	5	9	5	9	9	9	5	9	5	9	8	4	1	4	4	4	4	4	4	3	4	1	1	2	2	3	1	4	1
3	9	9	7	9	9	7	9	5	3	5	7	5	9	7	9	9	5	2	3	5	9	9	4	1	4	4	4	4	4	4	4	4	3	3	4	4	4	2	4	1
3	6	5	5	5	9	5	7	6	7	5	5	5	5	6	6	5	6	5	6	5	6	5	4	3	4	3	1	3	3	4	2	1	4	2	3	2	3	1	3	3
3	8	1	5	1	9	5	1	3	9	1	7	5	7	5	1	1	6	1	1	5	1	5	3	3	4	2	1	4	2	1	1	3	3	3	1	1	4	3	3	1
3	7	7	5	5	7	5	5	7	7	5	5	5	3	5	5	5	3	5	5	5	5	7	3	3	3	1	3	3	2	2	2	2	3	1	2	1	2	3	1	4
3	6	6	5	6	7	5	5	3	5	5	5	5	5	5	2	5	3	5	7	5	5	5	1	3	2	1	3	1	2	1	1	2	3	3	1	1	3	2	1	5
3	9	5	1	1	9	5	9	5	9	5	5	5	9	5	5	5	9	1	1	6	5	5	2	4	4	4	4	4	2	1	1	4	4	4	4	3	2	1	4	5
3	1	1	9	1	9	5	5	8	1	1	5	5	1	5	1	5	1	5	1	9	1	5	3	4	3	3	3	1	4	1	1	1	4	4	1	2	2	3	2	7
3	1	1	5	1	1	5	1	1	1	1	5	5	5	5	1	1	1	3	1	5	1	5	2	1	1	1	1	1	1	1	1	1	1	1	1	2	3	2	1	1
3	1	4	5	4	1	5	5	5	7	5	5	5	5	5	2	2	1	5	1	6	5	5	2	2	1	1	1	1	2	1	1	1	1	3	1	2	1	2	2	4
3	5	5	4	5	5	4	5	5	5	5	4	4	4	4	5	5	5	5	5	5	5	5	2	1	2	1	1	1	2	2	1	1	3	3	1	1	4	3	1	6
3	9	9	1	9	9	1	9	9	9	9	1	5	5	1	9	1	1	5	1	5	5	5	4	4	4	4	4	4	4	4	4	4	3	3	4	4	4	4	3	4
3	8	8	5	6	9	5	6	5	6	3	5	5	6	5	3	6	5	6	8	5	3	5	2	4	3	2	3	4	3	1	2	3	4	4	1	2	4	4	2	6
3	7	7	3	3	7	7	7	3	7	3	5	6	3	5	2	2	1	6	3	3	4	5	4	2	3	4	4	2	3	4	2	2	2	2	3	1	2	2	3	1
3	1	1	5	1	7	6	1	1	1	1	6	5	1	6	1	1	1	9	1	3	1	7	3	1	1	1	3	1	3	1	2	1	3	2	1	2	4	4	2	2
3	4	4	5	5	6	5	6	4	3	5	5	5	6	5	4	3	3	5	3	6	5	5	2	1	3	1	2	2	1	2	1	2	1	1	1	2	1	2	2	2
3	5	5	5	5	6	6	5	5	5	5	7	5	5	5	5	5	5	6	5	5	5	5	2	2	2	2	2	2	2	3	2	1	2	2	2	2	3	2	2	6
3	5	5	5	6	9	5	5	2	5	5	5	5	5	5	5	5	5	5	5	5	5	5	2	1	4	3	3	2	3	3	2	1	2	2	1	1	2	2	2	6
3	6	6	5	6	8	5	5	9	9	6	5	5	7	5	7	6	7	5	7	1	5	5	2	3	4	2	2	3	2	3	1	1	3	2	3	2	3	3	2	4
3	7	7	2	6	8	2	8	5	5	1	3	1	5	3	1	1	1	5	2	2	6	2	1	3	3	4	3	1	3	2	2	2	3	3	2	3	1	2	4	5
3	9	8	5	5	5	5	5	8	8	5	5	5	3	5	5	5	5	2	2	3	5	5	2	2	2	3	4	4	3	1	2	1	2	2	3	2	2	2	2	3
3	2	2	5	5	6	5	2	5	1	5	6	5	5	5	3	5	3	4	3	4	3	5	3	1	2	2	2	2	2	1	1	1	1	1	1	2	1	2	2	1
3	5	5	5	5	6	5	5	4	4	5	5	5	5	5	5	5	5	5	5	5	5	5	2	1	2	2	1	1	1	1	1	1	1	1	1	1	1	1	1	1
3	2	2	5	5	6	5	2	5	1	5	6	5	5	5	3	5	3	4	3	4	3	5	3	1	2	2	2	2	2	1	1	1	1	1	1	2	1	2	2	1
3	5	7	5	7	8	5	8	3	3	2	5	5	6	6	8	6	3	6	3	5	2	7	2	3	3	2	2	3	1	1	2	2	4	4	2	2	4	3	2	5
3	9	6	5	5	9	6	7	5	6	5	5	5	3	6	8	4	3	5	3	5	5	8	3	3	4	4	4	3	4	3	4	2	3	3	3	3	3	3	3	4
3	5	5	9	5	9	9	5	5	5	5	9	9	9	9	5	5	5	9	5	9	5	5	2	1	3	3	2	2	4	3	2	3	1	1	2	1	1	2	2	4
3	6	3	5	2	7	6	6	8	3	1	5	7	7	5	7	2	4	1	1	5	5	3	2	1	3	2	2	3	2	1	1	2	2	4	2	1	3	4	2	3
3	5	5	5	5	9	7	5	6	7	5	5	5	5	5	9	7	1	7	1	7	9	9	4	1	4	4	4	2	3	4	4	3	1	1	3	4	2	1	3	3
3	9	7	3	8	9	2	6	8	9	6	5	5	9	5	5	7	9	9	9	5	9	5	3	2	4	2	2	4	4	2	1	4	4	2	1	1	3	3	4	3
3	3	3	5	5	9	9	9	9	9	9	5	5	5	5	5	2	2	2	9	5	9	5	3	1	4	2	3	2	2	3	3	3	2	1	4	4	3	1	3	2
3	4	4	5	5	3	5	3	3	3	4	5	5	3	5	3	3	5	5	5	5	3	5	3	1	2	1	3	1	3	2	1	1	1	1	1	2	2	2	1	2
3	2	3	5	3	3	5	3	4	2	3	5	5	3	5	3	3	1	5	2	5	4	5	2	2	2	2	2	2	2	1	1	1	3	2	1	1	1	3	1	5
3	9	9	5	5	9	5	9	5	9	9	5	5	5	5	9	7	2	3	3	5	3	5	2	2	4	4	2	4	2	2	2	1	2	2	2	2	2	4	2	3
3	9	9	5	9	9	5	9	5	9	5	5	5	9	5	9	9	9	5	9	5	9	5	2	2	3	1	3	3	2	1	1	3	3	4	2	1	1	2	1	3
3	9	9	5	5	9	5	9	5	9	9	5	5	5	5	9	7	2	3	3	5	3	5	2	2	4	4	2	4	2	2	2	1	2	2	2	2	2	4	2	3
3	1	5	7	5	1	7	9	5	1	1	5	5	8	8	1	2	1	5	1	7	6	8	3	2	1	2	3	1	3	4	3	4	1	1	2	1	3	2	2	1
3	5	5	5	5	9	7	5	6	7	5	5	5	5	5	9	7	1	7	1	7	9	9	4	1	4	4	4	2	3	4	4	3	1	1	3	4	2	1	3	3
3	1	6	5	3	7	5	6	4	7	2	7	5	6	6	1	1	1	6	5	5	2	6	2	1	3	3	2	2	3	2	2	2	1	1	1	2	2	2	1	7
3	5	6	2	5	9	6	5	7	9	5	4	1	1	1	7	7	2	5	5	1	7	1	3	2	3	3	4	3	3	2	4	2	2	3	2	2	3	2	3	4
3	1	1	6	3	3	5	1	1	1	1	5	6	4	6	1	1	1	5	1	5	8	5	1	3	2	1	1	1	1	2	1	2	3	3	2	1	2	4	1	2
3	5	5	5	5	5	5	5	3	5	5	3	5	5	5	5	5	2	5	5	5	2	5	1	1	1	1	1	1	3	4	2	1	1	1	1	1	1	2	2	8
3	1	1	8	2	6	9	2	4	2	2	6	7	7	8	2	2	2	8	2	7	2	7	2	2	1	1	2	1	2	2	3	2	3	2	2	2	2	2	3	4
3	9	9	4	7	9	3	9	7	9	1	5	5	5	3	9	8	9	1	9	5	9	5	4	1	4	4	4	4	3	2	2	1	1	2	4	3	3	3	4	3
3	5	6	5	5	9	5	7	5	6	4	5	5	7	5	8	5	3	7	7	3	5	6	2	1	4	4	3	3	2	2	4	3	3	3	1	2	3	2	3	6
3	3	3	7	4	6	7	4	7	1	5	6	5	4	5	5	2	3	4	2	7	4	6	2	2	1	1	3	1	1	3	1	1	2	2	1	1	3	3	1	3
3	7	2	1	1	9	1	6	1	1	1	5	5	5	5	1	1	3	5	1	7	5	5	2	4	4	3	1	1	2	2	1	1	4	2	2	2	1	3	2	4
3	7	7	6	5	8	7	7	5	6	4	5	5	3	7	5	4	4	5	7	5	5	7	3	2	4	4	4	3	3	4	4	2	2	2	3	2	3	3	3	4
3	1	1	5	5	3	7	1	3	2	5	7	8	1	7	2	2	2	5	2	7	2	8	3	2	1	1	2	1	2	2	1	1	1	3	1	2	3	3	1	3
3	7	7	5	5	9	6	8	8	7	5	5	7	7	5	8	7	7	5	7	6	7	6	3	1	3	3	3	4	3	2	3	2	2	2	2	3	2	3	3	3
3	6	1	5	5	9	5	2	7	3	5	5	5	5	5	6	2	1	1	6	5	5	5	3	4	2	2	2	1	2	3	4	1	2	1	3	4	1	1	3	5
3	5	5	5	7	7	5	8	3	5	5	5	5	5	6	6	8	5	5	5	5	7	5	2	1	3	2	2	2	2	1	1	2	1	1	3	2	3	1	2	2
3	2	2	5	2	2	5	3	1	2	1	6	5	5	5	6	5	2	5	3	5	5	5	2	3	2	1	2	1	1	1	2	2	3	2	1	2	4	1	1	5
3	9	8	5	5	8	8	5	1	1	5	5	5	9	5	1	1	1	5	9	9	9	5	4	4	4	4	4	3	3	3	3	1	3	4	3	3	4	3	3	7
3	2	9	5	9	9	5	9	5	7	5	5	5	5	5	2	9	5	5	5	9	5	7	3	1	3	1	3	3	3	2	1	1	2	1	1	2	3	3	3	4
3	5	5	5	5	5	5	5	5	5	5	6	5	5	5	5	5	2	5	5	3	5	5	1	1	1	1	1	1	1	1	1	1	1	3	1	1	1	4	1	2
3	4	6	6	5	7	6	5	3	5	5	5	5	5	5	7	5	7	5	5	3	5	5	2	3	3	1	2	1	2	1	1	1	3	2	1	1	4	3	1	4
3	9	8	3	7	9	2	9	5	9	4	5	5	8	5	7	7	3	5	5	5	8	5	2	2	4	4	2	4	3	3	4	3	2	2	3	3	3	3	3	3
3	5	5	5	5	5	5	5	5	5	5	5	5	7	5	5	5	5	3	5	5	5	5	4	1	1	3	3	1	3	3	2	1	1	1	3	2	1	3	2	1
3	6	6	5	6	7	5	4	3	3	4	5	5	5	4	5	4	2	6	3	4	3	6	2	2	3	1	3	2	3	3	2	3	4	3	2	2	2	3	1	3
3	3	5	6	5	5	9	4	3	3	1	6	9	3	6	1	1	1	5	1	6	1	7	1	1	1	1	3	1	2	1	3	1	1	1	3	4	1	2	1	1
3	3	3	7	5	3	7	3	5	3	3	7	8	5	7	5	3	1	7	1	7	5	7	2	2	1	2	3	1	2	3	2	3	1	1	2	1	1	2	2	1
3	9	7	5	7	9	5	8	5	9	7	5	5	8	5	8	7	7	5	9	5	7	5	3	3	4	4	4	4	3	4	4	4	2	3	3	2	3	3	3	4
3	7	5	5	5	8	5	5	4	6	5	5	5	5	5	8	5	5	5	5	6	5	5	2	1	3	1	1	3	2	2	2	2	1	1	2	2	2	1	2	1
3	8	7	5	3	9	6	7	6	9	4	6	7	3	5	8	4	4	3	5	3	7	8	2	3	3	3	4	4	2	2	3	2	3	4	3	2	4	1	3	5
3	3	3	5	5	5	7	5	4	5	5	6	5	5	5	7	5	3	7	3	3	5	7	4	2	3	3	3	2	3	3	2	2	3	3	3	1	3	3	3	2
3	3	6	5	7	3	6	3	1	2	1	5	4	3	5	6	2	1	2	5	5	4	3	2	1	2	3	1	1	2	1	1	1	1	1	1	1	3	1	4	1
3	9	9	1	9	9	5	9	1	1	1	5	6	5	5	1	6	1	5	9	5	9	5	4	4	4	4	4	4	1	1	1	4	3	1	1	2	3	2	2	1
3	7	5	5	5	9	5	7	5	5	5	3	5	5	5	9	1	1	5	5	3	5	5	2	4	3	2	2	1	2	2	2	1	4	2	2	1	3	3	1	4
3	1	5	1	5	9	1	9	1	5	9	1	1	5	1	5	5	5	1	1	1	5	5	3	1	4	4	2	1	4	3	1	1	2	2	1	1	2	4	3	6
3	5	5	5	5	8	5	5	5	5	5	5	5	5	5	5	5	5	5	5	5	5	5	2	1	2	3	3	2	2	2	2	2	2	1	3	2	2	1	3	2
3	4	4	7	4	7	7	4	2	4	4	8	7	5	7	5	5	3	5	5	8	5	8	2	2	2	2	1	1	2	1	1	1	3	3	2	2	1	3	2	5
3	3	3	5	5	7	7	5	9	7	5	7	4	5	7	4	5	5	3	9	4	6	9	3	2	3	2	4	4	4	2	2	3	3	4	2	2	3	2	2	4
3	2	3	7	4	1	5	4	4	2	4	5	5	4	5	2	5	4	6	5	4	4	5	2	3	1	2	3	1	3	3	3	2	2	2	3	1	4	1	2	3
3	2	2	5	5	1	5	5	3	3	5	5	5	4	5	1	1	1	5	1	5	2	6	2	1	2	1	3	1	3	3	2	1	1	1	1	2	2	2	2	1
3	5	6	4	6	6	3	8	8	5	5	2	2	2	2	2	2	1	5	5	5	5	5	2	3	1	1	1	1	1	1	1	1	3	3	2	1	4	3	1	6
3	5	5	5	5	6	6	5	4	5	5	5	6	4	6	4	3	3	5	4	6	5	6	2	3	3	2	2	2	2	1	1	1	3	3	1	1	2	4	1	6
3	4	2	2	2	8	6	2	9	1	1	5	5	5	5	6	6	1	5	9	5	8	5	2	3	4	3	3	3	3	3	4	1	3	1	2	2	3	2	2	2
3	3	3	5	4	6	5	4	4	4	5	5	5	5	6	2	2	2	5	4	5	4	5	3	1	2	2	3	1	1	1	3	3	1	1	3	3	1	1	2	1
3	7	7	5	7	7	7	7	5	7	5	5	5	5	5	5	5	5	5	3	5	5	5	2	2	3	1	2	3	3	2	2	1	3	2	1	2	2	3	1	1
3	4	5	5	4	4	5	4	4	5	5	6	6	5	6	5	4	4	5	5	6	5	6	3	1	2	1	2	1	3	1	2	1	1	1	2	2	3	2	1	1
3	6	4	5	4	7	5	6	5	6	5	5	5	5	6	4	3	3	5	4	5	5	5	2	2	3	2	2	2	2	1	2	1	2	1	3	4	3	4	2	3
3	1	1	6	2	2	6	1	4	1	5	6	7	2	4	1	1	1	3	1	5	1	5	2	4	1	2	2	1	2	3	3	1	1	1	3	3	2	1	3	1
3	2	1	5	3	9	6	1	2	7	1	4	5	6	5	9	1	1	4	2	5	2	5	1	3	2	3	2	3	4	2	1	2	4	3	1	1	3	3	2	2
3	6	4	5	4	7	7	7	3	3	3	6	5	7	5	4	3	3	4	3	7	4	7	2	3	3	2	2	2	2	2	2	3	3	2	2	1	3	3	2	4
3	7	5	4	5	8	4	6	7	6	6	5	5	5	5	8	5	4	5	2	5	5	5	2	3	3	3	3	3	3	2	3	3	3	4	3	1	1	3	3	6
3	3	5	7	3	5	7	6	8	3	5	5	5	3	7	5	7	5	5	5	7	2	7	2	1	1	3	3	1	2	3	3	1	2	2	2	1	3	3	3	3
3	5	6	3	5	7	3	6	7	5	3	4	5	7	4	6	5	2	2	4	3	6	5	2	2	3	2	2	2	3	2	2	2	3	2	1	2	2	3	3	4
3	9	5	5	3	9	4	9	5	9	9	7	5	9	5	3	7	5	7	5	4	5	7	4	1	4	4	4	4	4	4	4	3	1	3	4	4	2	2	4	2
3	5	8	5	5	7	7	5	2	2	2	5	5	2	5	2	2	1	5	5	7	2	5	3	1	3	3	3	1	3	2	1	1	1	1	2	2	1	3	2	1
3	5	5	7	5	7	7	5	5	3	2	7	5	5	6	5	5	1	5	5	5	3	7	3	3	2	3	3	2	3	3	3	2	3	3	3	2	3	2	3	5
3	2	2	5	5	7	5	8	1	1	5	5	5	7	5	1	5	1	5	5	6	5	5	3	3	3	1	3	1	4	2	1	3	2	3	1	1	3	2	1	6
3	7	7	3	5	8	6	7	5	7	5	5	5	2	5	3	3	1	1	5	5	1	5	3	3	3	2	3	4	3	4	3	2	3	3	3	3	4	3	3	6
3	4	6	5	6	7	5	4	5	3	4	6	5	3	6	3	4	2	5	4	5	3	6	3	2	2	3	3	2	3	2	2	2	2	2	3	2	4	1	3	5
3	1	2	5	4	9	5	1	3	3	3	6	6	2	6	3	3	1	5	5	6	2	6	3	1	3	2	2	2	3	1	2	2	2	1	2	3	3	1	2	4
3	6	6	5	5	3	6	5	4	5	5	6	6	6	5	2	2	2	5	2	6	2	6	1	2	2	2	2	2	2	4	2	2	2	2	2	2	2	3	2	2
3	5	5	5	5	6	5	5	5	5	5	5	5	5	5	5	5	5	5	5	5	5	5	4	4	2	1	3	1	2	1	1	1	2	1	1	2	3	1	1	1
3	3	7	3	7	8	3	8	8	8	3	5	5	5	5	3	3	2	2	2	2	2	7	3	2	4	4	4	4	3	3	3	2	2	2	3	3	4	2	3	6
3	9	8	5	1	9	5	7	3	9	1	5	5	5	3	1	1	1	5	1	5	7	5	3	3	4	4	1	3	2	4	2	3	4	3	1	1	4	3	2	3
3	8	8	5	5	9	8	5	9	8	5	6	5	5	6	5	5	5	5	5	5	5	6	3	3	4	3	3	4	3	1	1	1	3	3	1	2	2	2	3	6
3	7	8	1	5	7	5	7	2	5	1	5	5	1	5	6	5	1	1	5	2	7	5	3	1	3	2	2	3	2	2	2	2	2	1	1	2	1	2	2	2
3	7	7	6	4	9	8	4	8	6	2	7	7	3	5	6	2	1	5	1	5	2	5	4	2	4	3	4	4	3	3	2	2	1	1	3	3	1	3	2	2
3	3	3	7	3	1	7	3	5	3	3	7	7	5	5	1	3	1	7	1	7	3	7	1	1	1	1	3	1	2	2	2	1	1	1	3	3	2	1	1	2
3	1	1	5	1	1	5	5	5	1	1	5	9	5	5	1	1	9	1	1	9	5	9	2	2	3	1	3	1	1	1	1	1	2	2	1	2	4	3	2	5
3	9	7	5	8	9	5	8	3	3	4	5	5	7	6	6	4	2	5	6	4	7	6	3	2	4	3	4	4	2	2	3	3	2	3	3	3	3	2	3	3
3	9	8	4	5	8	3	6	5	6	5	5	5	7	5	6	5	4	6	7	5	6	4	3	3	3	3	3	3	4	4	3	3	3	3	2	2	2	3	3	4
3	8	8	5	6	9	2	9	9	4	4	5	5	9	5	9	9	1	1	5	1	7	5	4	2	4	4	1	4	4	4	4	4	1	2	3	4	4	1	4	1
3	4	6	5	4	8	5	6	6	4	4	5	5	6	4	7	3	3	5	4	5	6	5	2	1	3	1	3	2	3	1	2	3	2	2	1	1	3	1	1	4
3	9	8	4	5	8	3	6	5	6	5	5	5	7	5	6	5	4	6	7	5	6	4	3	3	3	3	3	3	4	4	3	3	3	3	2	2	2	3	3	4
